# Supplementary material for: Early Emergence Phase of SARS-CoV-2 Delta Variant in Florida, US
Source: MDPI journal article supplement (doi:10.3390/v14040766), 2022-04-06
Supplement: s1 [file s1]

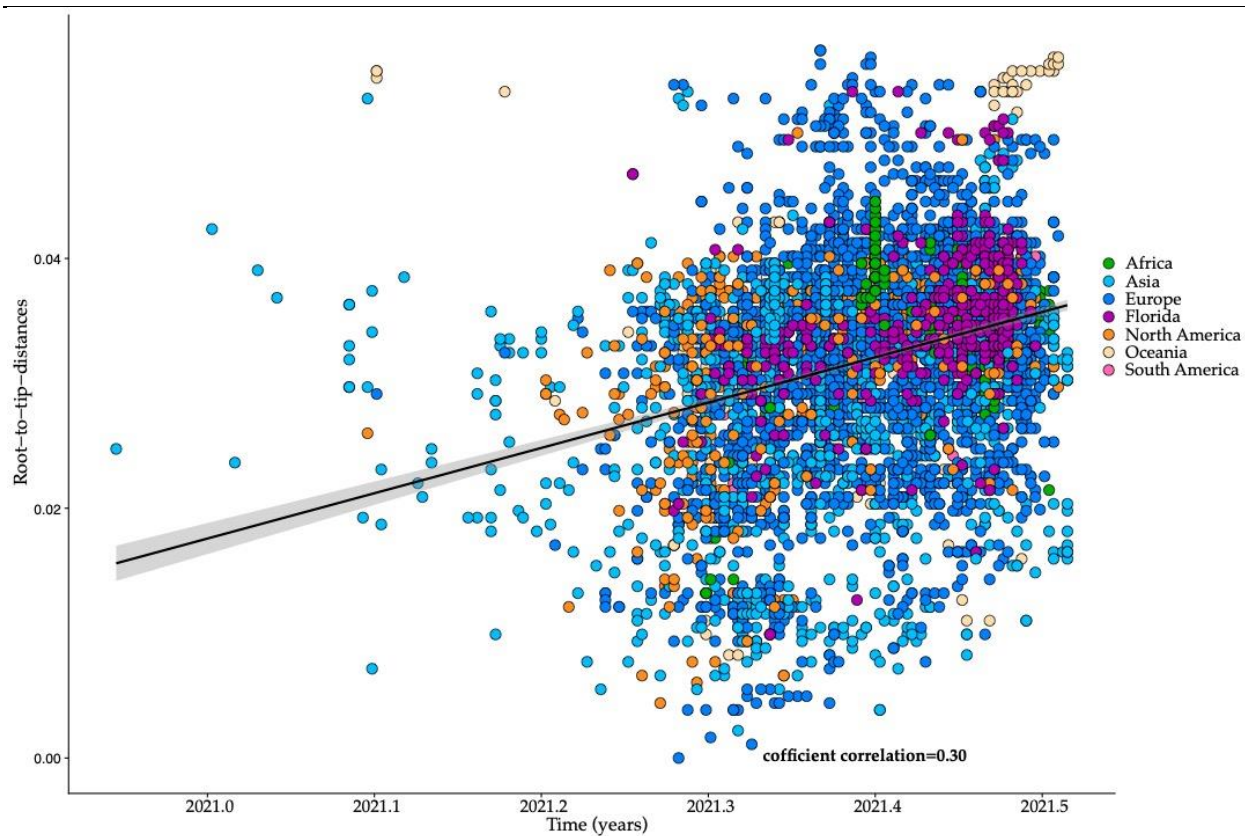

**Figure S1.** Analysis of temporal structure. Root-to-tip genetic divergence for the whole dataset against time of sampling.
