# Supplementary material for: Early Emergence Phase of SARS-CoV-2 Delta Variant in Florida, US
Source: MDPI journal article supplement (doi:10.3390/v14040766), 2022-04-06
Supplement: s1 [file s1]

Authors are sorted alphabetically.

EPI.ISL.2137225, EPI.ISL.2427162, EPI.ISL.2484977, EPI.ISL.2485157, EPI.ISL.2657385, EPI.ISL.265716, EPI.ISL.2657390, EPI.ISL.2657404, EPI.ISL.2657474, EPI.ISL.2657475, EPI.ISL.2657482, EPI.ISL.2657485, EPI.ISL.2657486, EPI.ISL.2657487, EPI.ISL.2657488, EPI.ISL.2657490, EPI.ISL.2657492, EPI.ISL.2657495, EPI.ISL.2657498, EPI.ISL.2757953, EPI.ISL.2757954, EPI.ISL.2757955, EPI.ISL.2757956, EPI.ISL.2757958, EPI.ISL.2757959, EPI.ISL.2757966, EPI.ISL.2757972, EPI.ISL.2757977, EPI.ISL.2757980, EPI.ISL.2757981, EPI.ISL.2757983, EPI.ISL.2757984, EPI.ISL.2757990, EPI.ISL.2757992, EPI.ISL.2757993, EPI.ISL.2757994, EPI.ISL.2757995, EPI.ISL.2758002, EPI.ISL.2758004, EPI.ISL.2758005, EPI.ISL.2758051, EPI.ISL.2758052, EPI.ISL.2758054, EPI.ISL.2758056, EPI.ISL.2758057, EPI.ISL.2758058, EPI.ISL.2758059, EPI.ISL.2758060, EPI.ISL.2758061, EPI.ISL.2758063, EPI.ISL.2758064, EPI.ISL.2758065, EPI.ISL.2758066, EPI.ISL.2758067, EPI.ISL.2758068, EPI.ISL.2758069, EPI.ISL.2758070, EPI.ISL.2758071,

|                                                                                                                                                                                                                                                                                                                                                                                                                                                                                                                                                                                                                                                                                                                                                                                                                                                                                                                                                                                                                                                                                                                                                                                                                                                                                                                                                                                                                                                                                                                                                                                                           |                                                                                        |                                                                                                                                            |                                                                                                                                                                                                                                                                                                                                                                                                                                                                                                                                                                                                                                                                                                                                                |  |
|-----------------------------------------------------------------------------------------------------------------------------------------------------------------------------------------------------------------------------------------------------------------------------------------------------------------------------------------------------------------------------------------------------------------------------------------------------------------------------------------------------------------------------------------------------------------------------------------------------------------------------------------------------------------------------------------------------------------------------------------------------------------------------------------------------------------------------------------------------------------------------------------------------------------------------------------------------------------------------------------------------------------------------------------------------------------------------------------------------------------------------------------------------------------------------------------------------------------------------------------------------------------------------------------------------------------------------------------------------------------------------------------------------------------------------------------------------------------------------------------------------------------------------------------------------------------------------------------------------------|----------------------------------------------------------------------------------------|--------------------------------------------------------------------------------------------------------------------------------------------|------------------------------------------------------------------------------------------------------------------------------------------------------------------------------------------------------------------------------------------------------------------------------------------------------------------------------------------------------------------------------------------------------------------------------------------------------------------------------------------------------------------------------------------------------------------------------------------------------------------------------------------------------------------------------------------------------------------------------------------------|--|
| EPI_ISL_2758073, EPI_ISL_2758074, EPI_ISL_2758075, EPI_ISL_2758076, EPI_ISL_2758077, EPI_ISL_2758078, EPI_ISL_2758083, EPI_ISL_2758085, EPI_ISL_2758087, EPI_ISL_2758088, EPI_ISL_2758090, EPI_ISL_2758091, EPI_ISL_2758092, EPI_ISL_2758094, EPI_ISL_2758095, EPI_ISL_2758096, EPI_ISL_2758102, EPI_ISL_2758103, EPI_ISL_2758104, EPI_ISL_2758106, EPI_ISL_2758107, EPI_ISL_2758108, EPI_ISL_2758113, EPI_ISL_2758114, EPI_ISL_2758118, EPI_ISL_2758119, EPI_ISL_2758122, EPI_ISL_2758123, EPI_ISL_2758127, EPI_ISL_2758128, EPI_ISL_2758141, EPI_ISL_2758148, EPI_ISL_2758163, EPI_ISL_2758167, EPI_ISL_2758174, EPI_ISL_2887417, EPI_ISL_2887420, EPI_ISL_2887429, EPI_ISL_2887436, EPI_ISL_2887439, EPI_ISL_2887448, EPI_ISL_2887456, EPI_ISL_2887457, EPI_ISL_2887464, EPI_ISL_2887466, EPI_ISL_2887473, EPI_ISL_2887477, EPI_ISL_2887484, EPI_ISL_2887485, EPI_ISL_2887486, EPI_ISL_2887487, EPI_ISL_2887494, EPI_ISL_2887527, EPI_ISL_2887528, EPI_ISL_2887572, EPI_ISL_2887573, EPI_ISL_2887604, EPI_ISL_2887610, EPI_ISL_2887616, EPI_ISL_2887619, EPI_ISL_2887621, EPI_ISL_2887625, EPI_ISL_2887626, EPI_ISL_2887629, EPI_ISL_2887636, EPI_ISL_2887649, EPI_ISL_2887653, EPI_ISL_2887661, EPI_ISL_2887662, EPI_ISL_2887665                                                                                                                                                                                                                                                                                                                                                                      |                                                                                        |                                                                                                                                            |                                                                                                                                                                                                                                                                                                                                                                                                                                                                                                                                                                                                                                                                                                                                                |  |
| see above                                                                                                                                                                                                                                                                                                                                                                                                                                                                                                                                                                                                                                                                                                                                                                                                                                                                                                                                                                                                                                                                                                                                                                                                                                                                                                                                                                                                                                                                                                                                                                                                 | Austrian Agency for Health and Food Safety (AGES)                                      | Berghaler laboratory, CeMM Research Center for Molecular Medicine of the Austrian Academy of Sciences                                      | Andreas Berghaler; Anna Schedl; Bekir Erguner; Benedikt Agerer; Christoph Bock; Fabian Amman; Jan Laine; Lukas Endler; Maelle Le Moing; Martin Senekowitsch; Matthew Thornton; Michael Schuster; Petr Triska; Thomas Penz                                                                                                                                                                                                                                                                                                                                                                                                                                                                                                                      |  |
| EPI_ISL_2895330, EPI_ISL_2895337, EPI_ISL_2895346                                                                                                                                                                                                                                                                                                                                                                                                                                                                                                                                                                                                                                                                                                                                                                                                                                                                                                                                                                                                                                                                                                                                                                                                                                                                                                                                                                                                                                                                                                                                                         | Avelab                                                                                 | Instituto Nacional de Saude (INSA)                                                                                                         | Borges et al                                                                                                                                                                                                                                                                                                                                                                                                                                                                                                                                                                                                                                                                                                                                   |  |
| EPI_ISL_3031275, EPI_ISL_3031276                                                                                                                                                                                                                                                                                                                                                                                                                                                                                                                                                                                                                                                                                                                                                                                                                                                                                                                                                                                                                                                                                                                                                                                                                                                                                                                                                                                                                                                                                                                                                                          | Azarian Lab at Burnett School of Biomedical Sciences                                   | Azarian Lab at Burnett School of Biomedical Sciences                                                                                       | Catherine Johnston; Eleonora Cella; Taj Azarian                                                                                                                                                                                                                                                                                                                                                                                                                                                                                                                                                                                                                                                                                                |  |
| EPI_ISL_2872658, EPI_ISL_2872660                                                                                                                                                                                                                                                                                                                                                                                                                                                                                                                                                                                                                                                                                                                                                                                                                                                                                                                                                                                                                                                                                                                                                                                                                                                                                                                                                                                                                                                                                                                                                                          | Azienda Ospedaliero Universitaria di Sassari                                           | AMES Centro Polidiagnostico Strumentale S.r.l.                                                                                             | Anna Puggioni; Bianca Paglietti; Caterina Serra; Claudia Piu; Elena Rimini; Erica Mura; Flavia Angioj; Gabriele Ibba; Giulia Rocca; Laura Firino; Rosalba Govoni; Salvatore Rubino; Sergio Uzzau; Vincenzo Lai                                                                                                                                                                                                                                                                                                                                                                                                                                                                                                                                 |  |
| EPI_ISL_2680969, EPI_ISL_2725540                                                                                                                                                                                                                                                                                                                                                                                                                                                                                                                                                                                                                                                                                                                                                                                                                                                                                                                                                                                                                                                                                                                                                                                                                                                                                                                                                                                                                                                                                                                                                                          | Azienda Sanitaria dell'Alto Adige - Laboratorio Aziendale di Microbiologia e Virologia | Azienda Sanitaria dell'Alto Adige                                                                                                          | Irene Bianconi                                                                                                                                                                                                                                                                                                                                                                                                                                                                                                                                                                                                                                                                                                                                 |  |
| EPI_ISL_1840787, EPI_ISL_2080266, EPI_ISL_2080267, EPI_ISL_2080268, EPI_ISL_2080270, EPI_ISL_2318924, EPI_ISL_2318925, EPI_ISL_2517124, EPI_ISL_2550649, EPI_ISL_2550690                                                                                                                                                                                                                                                                                                                                                                                                                                                                                                                                                                                                                                                                                                                                                                                                                                                                                                                                                                                                                                                                                                                                                                                                                                                                                                                                                                                                                                  |                                                                                        |                                                                                                                                            |                                                                                                                                                                                                                                                                                                                                                                                                                                                                                                                                                                                                                                                                                                                                                |  |
| see above                                                                                                                                                                                                                                                                                                                                                                                                                                                                                                                                                                                                                                                                                                                                                                                                                                                                                                                                                                                                                                                                                                                                                                                                                                                                                                                                                                                                                                                                                                                                                                                                 | Azienda Sanitaria dell'Alto Adige Laboratorio Aziendale di Microbiologia e Virologia   | Istituto di Genomica Applicata                                                                                                             | Davide Scaglione; Eleonora Paparelli; Elisa Masi; Elisabetta Giacobazzi; Elisabetta Pagani; Gabriele Magris; Irena Jurman; Irene Bianconi; Michele Morgante; Stefanie Wieser; Vera Vendramin                                                                                                                                                                                                                                                                                                                                                                                                                                                                                                                                                   |  |
| EPI_ISL_2600798                                                                                                                                                                                                                                                                                                                                                                                                                                                                                                                                                                                                                                                                                                                                                                                                                                                                                                                                                                                                                                                                                                                                                                                                                                                                                                                                                                                                                                                                                                                                                                                           | Azienda USL Umbria 2                                                                   | Istituto Zooprofilattico Sperimentale dell'Abruzzo e Molise "G. Caporale"                                                                  | Ancora M; Calistri P; Cammà C; Curini V; Delli Compagni E; Di Domenico M; Di Pasquale A; Lorusso A; Mangone I; Marcacci M; Pistoni E; Proietti A; Puglia I; Rinaldi A; Savini G; Scialabba S                                                                                                                                                                                                                                                                                                                                                                                                                                                                                                                                                   |  |
| EPI_ISL_2728246, EPI_ISL_2728311, EPI_ISL_2728465                                                                                                                                                                                                                                                                                                                                                                                                                                                                                                                                                                                                                                                                                                                                                                                                                                                                                                                                                                                                                                                                                                                                                                                                                                                                                                                                                                                                                                                                                                                                                         | BBMP Urban                                                                             | INSACOG-KA, NIMHANS                                                                                                                        | Ananthapadmanabha Kotambail; Anita S Desai; Anson Kunjumon George; Chetan G K; Chitra Pattabiraman; Darshan Sreenivas; Ellango Ramasamy; Gautham Arunachal Udupi; Mahesh Kumar.C.S; Sony Sharma; V Ravi                                                                                                                                                                                                                                                                                                                                                                                                                                                                                                                                        |  |
| EPI_ISL_2529589, EPI_ISL_2530862, EPI_ISL_2530880, EPI_ISL_2530909, EPI_ISL_2530949, EPI_ISL_2530951, EPI_ISL_2530954, EPI_ISL_2531022, EPI_ISL_2531043, EPI_ISL_2531046, EPI_ISL_2531050, EPI_ISL_2531058, EPI_ISL_2531067, EPI_ISL_2531077, EPI_ISL_2531079, EPI_ISL_2531082, EPI_ISL_2531084, EPI_ISL_2531086, EPI_ISL_2531090, EPI_ISL_2531092, EPI_ISL_2531094, EPI_ISL_2531096, EPI_ISL_2531099, EPI_ISL_2531100, EPI_ISL_2531104, EPI_ISL_2531105, EPI_ISL_2655690, EPI_ISL_2655803, EPI_ISL_2655902, EPI_ISL_2655964, EPI_ISL_2655972, EPI_ISL_2655998, EPI_ISL_2656001, EPI_ISL_2656025, EPI_ISL_2656181, EPI_ISL_2656303, EPI_ISL_2656337, EPI_ISL_2656349, EPI_ISL_2656460, EPI_ISL_2656487, EPI_ISL_2656634, EPI_ISL_2656637, EPI_ISL_2656727, EPI_ISL_2656736, EPI_ISL_2657111, EPI_ISL_2657112, EPI_ISL_2657119, EPI_ISL_2719042, EPI_ISL_2719043, EPI_ISL_2719387, EPI_ISL_2719392, EPI_ISL_2719401, EPI_ISL_2719427, EPI_ISL_2719483, EPI_ISL_2719510, EPI_ISL_2719559, EPI_ISL_2719571, EPI_ISL_2719705, EPI_ISL_2719872, EPI_ISL_2719873, EPI_ISL_2719883, EPI_ISL_2719905, EPI_ISL_2719923, EPI_ISL_2719960, EPI_ISL_2719983, EPI_ISL_2720222, EPI_ISL_2720230, EPI_ISL_2720291, EPI_ISL_2720387, EPI_ISL_2720609, EPI_ISL_2720610, EPI_ISL_2720639, EPI_ISL_2720689, EPI_ISL_2720718, EPI_ISL_2721073, EPI_ISL_2721074, EPI_ISL_2721398, EPI_ISL_2721424, EPI_ISL_2721428, EPI_ISL_2721429, EPI_ISL_2721488, EPI_ISL_2721494, EPI_ISL_2721514, EPI_ISL_2721532, EPI_ISL_2721583, EPI_ISL_2721636, EPI_ISL_2721653, EPI_ISL_2721679, EPI_ISL_2721717, EPI_ISL_2721731, EPI_ISL_2721759 |                                                                                        |                                                                                                                                            |                                                                                                                                                                                                                                                                                                                                                                                                                                                                                                                                                                                                                                                                                                                                                |  |
| see above                                                                                                                                                                                                                                                                                                                                                                                                                                                                                                                                                                                                                                                                                                                                                                                                                                                                                                                                                                                                                                                                                                                                                                                                                                                                                                                                                                                                                                                                                                                                                                                                 | BCCDC Public Health Laboratory                                                         | BCCDC Public Health Laboratory                                                                                                             | Ana Pacagnella; Corrinne Ng; Dan Fornika; John Tyson; Kim Macdonald; Kimia Kamelian; Linda Hoang; Loretta Janz; Mel Kraiden; Prystajczyk Natalie; Robert Azana; Shannon Russell                                                                                                                                                                                                                                                                                                                                                                                                                                                                                                                                                                |  |
| EPI_ISL_2878555                                                                                                                                                                                                                                                                                                                                                                                                                                                                                                                                                                                                                                                                                                                                                                                                                                                                                                                                                                                                                                                                                                                                                                                                                                                                                                                                                                                                                                                                                                                                                                                           | BIO67-BIOSPHERE                                                                        | Department of Virology, Henri Mondor University Hospital, Assistance Publique Hôpitaux de Paris, Université Paris-Est Créteil, INSERM U955 | Alexandre Soulier; Christophe Rodríguez; Elisabeth Trawinski; Guillaume Gricourt; Jean-Michel Pawlowsky; Melissa N'Debi; Slim Fourati; Vanessa Demontant                                                                                                                                                                                                                                                                                                                                                                                                                                                                                                                                                                                       |  |
| EPI_ISL_2894131, EPI_ISL_2894132, EPI_ISL_2894133                                                                                                                                                                                                                                                                                                                                                                                                                                                                                                                                                                                                                                                                                                                                                                                                                                                                                                                                                                                                                                                                                                                                                                                                                                                                                                                                                                                                                                                                                                                                                         | BIO86 GENCAY                                                                           | CHU Poitiers                                                                                                                               | Agnes BEBY-DEFAUX; Birama N'DIAYE; Caroline MICHAUD; Magali GARCIA; Manon PRAT; Maxime PICHON; Nicolas LEVEQUE; Valentin BON-BARET                                                                                                                                                                                                                                                                                                                                                                                                                                                                                                                                                                                                             |  |
| EPI_ISL_2229053, EPI_ISL_2878456                                                                                                                                                                                                                                                                                                                                                                                                                                                                                                                                                                                                                                                                                                                                                                                                                                                                                                                                                                                                                                                                                                                                                                                                                                                                                                                                                                                                                                                                                                                                                                          | BIOMNIS EUROFINS IVRY                                                                  | Department of Virology, Henri Mondor University Hospital, Assistance Publique Hôpitaux de Paris, Université Paris-Est Créteil, INSERM U955 | Alexandre Soulier; Christophe Rodríguez; Elisabeth Trawinski; Guillaume Gricourt; Jean-Michel Pawlowsky; Melissa N'Debi; Slim Fourati; Vanessa Demontant                                                                                                                                                                                                                                                                                                                                                                                                                                                                                                                                                                                       |  |
| EPI_ISL_2106975                                                                                                                                                                                                                                                                                                                                                                                                                                                                                                                                                                                                                                                                                                                                                                                                                                                                                                                                                                                                                                                                                                                                                                                                                                                                                                                                                                                                                                                                                                                                                                                           | BPOM Gorontalo                                                                         | National Institute of Health Research and Development                                                                                      | Arie Ardiansyah Nugraha; Hana Apsari Pawestri; Hartanti Dian Ikawati; Kartika Dewi Puspa; Krisna Pangesti; Nelly Puspandari; Subangkit; Triyani Soekarso; Vivi Setiawaty                                                                                                                                                                                                                                                                                                                                                                                                                                                                                                                                                                       |  |
| EPI_ISL_2288982                                                                                                                                                                                                                                                                                                                                                                                                                                                                                                                                                                                                                                                                                                                                                                                                                                                                                                                                                                                                                                                                                                                                                                                                                                                                                                                                                                                                                                                                                                                                                                                           | BST                                                                                    | Banc de Sang i Teixits                                                                                                                     | Carlos Hobeich; Francisco Vidal; Irene Corrales; Lorena Ramirez; Maria Glòria Soria; Natàlia Comes; Nina Borràs; Noemí Gonzalez; Silvia Sauleda                                                                                                                                                                                                                                                                                                                                                                                                                                                                                                                                                                                                |  |
| EPI_ISL_2868887, EPI_ISL_2868889, EPI_ISL_2868891, EPI_ISL_2868892, EPI_ISL_2868894, EPI_ISL_2868896, EPI_ISL_2868897, EPI_ISL_2868899, EPI_ISL_2868901                                                                                                                                                                                                                                                                                                                                                                                                                                                                                                                                                                                                                                                                                                                                                                                                                                                                                                                                                                                                                                                                                                                                                                                                                                                                                                                                                                                                                                                   |                                                                                        |                                                                                                                                            |                                                                                                                                                                                                                                                                                                                                                                                                                                                                                                                                                                                                                                                                                                                                                |  |
| see above                                                                                                                                                                                                                                                                                                                                                                                                                                                                                                                                                                                                                                                                                                                                                                                                                                                                                                                                                                                                                                                                                                                                                                                                                                                                                                                                                                                                                                                                                                                                                                                                 | BTCLPP Kelas I Makassar                                                                | National Institute of Health Research and Development                                                                                      | Arie Ardiansyah Nugraha; Hana Apsari Pawestri; Hartanti Dian Ikawati; Kartika Dewi Puspa; Krisna Pangesti; Nelly Puspandari; Subangkit; Triyani Soekarso; Vivi Setiawaty                                                                                                                                                                                                                                                                                                                                                                                                                                                                                                                                                                       |  |
| EPI_ISL_2801892, EPI_ISL_2801893, EPI_ISL_2801894                                                                                                                                                                                                                                                                                                                                                                                                                                                                                                                                                                                                                                                                                                                                                                                                                                                                                                                                                                                                                                                                                                                                                                                                                                                                                                                                                                                                                                                                                                                                                         | Banteay Meanchey Regional Laboratory                                                   | Virology Unit, Institut Pasteur du Cambodge                                                                                                | Cecile Troupin; Chau Darapeak; Chin Savuth; Erik A Karlsson; Jurre Y Siegers; Kraing Sidonn; Leakhena Pum; Ly Sovann; Veasna Duong; Yi Sengdoeum                                                                                                                                                                                                                                                                                                                                                                                                                                                                                                                                                                                               |  |
| EPI_ISL_2490307, EPI_ISL_2544529                                                                                                                                                                                                                                                                                                                                                                                                                                                                                                                                                                                                                                                                                                                                                                                                                                                                                                                                                                                                                                                                                                                                                                                                                                                                                                                                                                                                                                                                                                                                                                          | Basurto University Hospital: Clinical Microbiology Laboratory                          | Biocruces Bizkaia                                                                                                                          | Ana de la Hoz; Estibaliz Ugalde Zarraga; José Luis Díaz de Tuesta del Arco; Mikel Gallego Rodrigo; Mikel Urrutikoetxea-Gutiérrez; Mª Carmen Nieto Toboso                                                                                                                                                                                                                                                                                                                                                                                                                                                                                                                                                                                       |  |
| EPI_ISL_2406459, EPI_ISL_2406460                                                                                                                                                                                                                                                                                                                                                                                                                                                                                                                                                                                                                                                                                                                                                                                                                                                                                                                                                                                                                                                                                                                                                                                                                                                                                                                                                                                                                                                                                                                                                                          | Battambang Provincial Laboratory                                                       | Virology Unit, Institut Pasteur du Cambodge                                                                                                | Cecile Troupin; Chau Darapeak; Chin Savuth; Erik A Karlsson; Jurre Y Siegers; Kraing Sidonn; Leakhena Pum; Ly Sovann; Veasna Duong; Yi Sengdoeum                                                                                                                                                                                                                                                                                                                                                                                                                                                                                                                                                                                               |  |
| EPI_ISL_2801895                                                                                                                                                                                                                                                                                                                                                                                                                                                                                                                                                                                                                                                                                                                                                                                                                                                                                                                                                                                                                                                                                                                                                                                                                                                                                                                                                                                                                                                                                                                                                                                           | Battambang Rapid Response Team                                                         | Virology Unit, Institut Pasteur du Cambodge                                                                                                | Cecile Troupin; Chau Darapeak; Chin Savuth; Erik A Karlsson; Jurre Y Siegers; Kraing Sidonn; Leakhena Pum; Ly Sovann; Veasna Duong; Yi Sengdoeum                                                                                                                                                                                                                                                                                                                                                                                                                                                                                                                                                                                               |  |
| EPI_ISL_2260533, EPI_ISL_2260540, EPI_ISL_2260543, EPI_ISL_2262724, EPI_ISL_2262751                                                                                                                                                                                                                                                                                                                                                                                                                                                                                                                                                                                                                                                                                                                                                                                                                                                                                                                                                                                                                                                                                                                                                                                                                                                                                                                                                                                                                                                                                                                       | Bayerisches Landesamt für Gesundheit und Lebensmittelsicherheit (LGL)                  | Robert Koch Institute                                                                                                                      |                                                                                                                                                                                                                                                                                                                                                                                                                                                                                                                                                                                                                                                                                                                                                |  |
| EPI_ISL_2529852, EPI_ISL_2529861                                                                                                                                                                                                                                                                                                                                                                                                                                                                                                                                                                                                                                                                                                                                                                                                                                                                                                                                                                                                                                                                                                                                                                                                                                                                                                                                                                                                                                                                                                                                                                          | Baylor College of Medicine/ GCID                                                       | Baylor College of Medicine/ GCID                                                                                                           | Charu Agrawal; Donna Muzny; Harsha Doddapaneni; Joseph Pertosino; Paige Farinholt; Pedro A. Piedra; Qinchang Meng; Qing Meng; Richard A. Gibbs; Timothy Farinholt; Vipin Menon; Xiang Qin                                                                                                                                                                                                                                                                                                                                                                                                                                                                                                                                                      |  |
| EPI_ISL_2333747, EPI_ISL_2878292, EPI_ISL_2878311, EPI_ISL_2878370, EPI_ISL_2878383, EPI_ISL_2878392, EPI_ISL_2878484                                                                                                                                                                                                                                                                                                                                                                                                                                                                                                                                                                                                                                                                                                                                                                                                                                                                                                                                                                                                                                                                                                                                                                                                                                                                                                                                                                                                                                                                                     |                                                                                        |                                                                                                                                            |                                                                                                                                                                                                                                                                                                                                                                                                                                                                                                                                                                                                                                                                                                                                                |  |
| see above                                                                                                                                                                                                                                                                                                                                                                                                                                                                                                                                                                                                                                                                                                                                                                                                                                                                                                                                                                                                                                                                                                                                                                                                                                                                                                                                                                                                                                                                                                                                                                                                 | Biogroup Bio Lam-LCD Saint-Denis                                                       | Department of Virology, Henri Mondor University Hospital, Assistance Publique Hôpitaux de Paris, Université Paris-Est Créteil, INSERM U955 | Alexandre Soulier; Christophe Rodríguez; Elisabeth Trawinski; Guillaume Gricourt; Jean-Michel Pawlowsky; Melissa N'Debi; Slim Fourati; Vanessa Demontant                                                                                                                                                                                                                                                                                                                                                                                                                                                                                                                                                                                       |  |
| EPI_ISL_2105673, EPI_ISL_2868422                                                                                                                                                                                                                                                                                                                                                                                                                                                                                                                                                                                                                                                                                                                                                                                                                                                                                                                                                                                                                                                                                                                                                                                                                                                                                                                                                                                                                                                                                                                                                                          | Biolab Diagnostic Laboratories                                                         | Biolab Diagnostic Laboratories                                                                                                             | Ahmad Tibi; Amid Abdelnour; Badia Saddedin; Elad Atwa; Issa Abu-Dayyeh; Lama Hussein; Shaima Ali; Shayma Ali                                                                                                                                                                                                                                                                                                                                                                                                                                                                                                                                                                                                                                   |  |
| EPI_ISL_2401509, EPI_ISL_2401510, EPI_ISL_2401513, EPI_ISL_2401516, EPI_ISL_2401517, EPI_ISL_2401526, EPI_ISL_2401615, EPI_ISL_2401625, EPI_ISL_2401633, EPI_ISL_2401651, EPI_ISL_2401678, EPI_ISL_2401687, EPI_ISL_2401709, EPI_ISL_2401720, EPI_ISL_2401729, EPI_ISL_2401749                                                                                                                                                                                                                                                                                                                                                                                                                                                                                                                                                                                                                                                                                                                                                                                                                                                                                                                                                                                                                                                                                                                                                                                                                                                                                                                            |                                                                                        |                                                                                                                                            |                                                                                                                                                                                                                                                                                                                                                                                                                                                                                                                                                                                                                                                                                                                                                |  |
| see above                                                                                                                                                                                                                                                                                                                                                                                                                                                                                                                                                                                                                                                                                                                                                                                                                                                                                                                                                                                                                                                                                                                                                                                                                                                                                                                                                                                                                                                                                                                                                                                                 | BioneXt Lab                                                                            | Laboratoire national de sante, Microbiologie, Microbial Genomics Platform                                                                  | Anke Wienecke-Baldacchino; Catherine Ragimbeau; Fatu Djabi; Jessica Tapp; Lise Pignon; Raoul Salmon; Tamir Abdelrahman; Thibault Ferrandon                                                                                                                                                                                                                                                                                                                                                                                                                                                                                                                                                                                                     |  |
| EPI_ISL_2108737, EPI_ISL_2125827, EPI_ISL_2470057, EPI_ISL_2636922, EPI_ISL_2636979, EPI_ISL_2637176, EPI_ISL_2759829, EPI_ISL_2845342                                                                                                                                                                                                                                                                                                                                                                                                                                                                                                                                                                                                                                                                                                                                                                                                                                                                                                                                                                                                                                                                                                                                                                                                                                                                                                                                                                                                                                                                    |                                                                                        |                                                                                                                                            |                                                                                                                                                                                                                                                                                                                                                                                                                                                                                                                                                                                                                                                                                                                                                |  |
| see above                                                                                                                                                                                                                                                                                                                                                                                                                                                                                                                                                                                                                                                                                                                                                                                                                                                                                                                                                                                                                                                                                                                                                                                                                                                                                                                                                                                                                                                                                                                                                                                                 | Bioscientia Labor Wermsdorf                                                            | Robert Koch Institute                                                                                                                      |                                                                                                                                                                                                                                                                                                                                                                                                                                                                                                                                                                                                                                                                                                                                                |  |
| EPI_ISL_2761985                                                                                                                                                                                                                                                                                                                                                                                                                                                                                                                                                                                                                                                                                                                                                                                                                                                                                                                                                                                                                                                                                                                                                                                                                                                                                                                                                                                                                                                                                                                                                                                           | Bioscientia MVZ Labor Karlsruhe GmbH                                                   | Robert Koch Institute                                                                                                                      |                                                                                                                                                                                                                                                                                                                                                                                                                                                                                                                                                                                                                                                                                                                                                |  |
| EPI_ISL_1970094, EPI_ISL_1970221, EPI_ISL_1970223, EPI_ISL_1970224, EPI_ISL_1970249, EPI_ISL_1970335                                                                                                                                                                                                                                                                                                                                                                                                                                                                                                                                                                                                                                                                                                                                                                                                                                                                                                                                                                                                                                                                                                                                                                                                                                                                                                                                                                                                                                                                                                      | Biotechnology Division, NCDC Delhi                                                     | NCDC Delhi, Biotechnology Division                                                                                                         | Hema Gogia; Hemlata Lal; Kalaarasan Ponnusamy; Mahesh S Dhar; Manoj K Singh; Meena Datta; Partha Rakshit; Preeti Madan; Priyanka Singh; Radhakrishnan V. S; Robin Marwal; Sandhya Kabra; Sujeet K Singh; Uma Sharma                                                                                                                                                                                                                                                                                                                                                                                                                                                                                                                            |  |
| EPI_ISL_2360256, EPI_ISL_2360257                                                                                                                                                                                                                                                                                                                                                                                                                                                                                                                                                                                                                                                                                                                                                                                                                                                                                                                                                                                                                                                                                                                                                                                                                                                                                                                                                                                                                                                                                                                                                                          | Boshehr University of Medical Sciences                                                 | National Influenza Center                                                                                                                  | A Nejati; F Ajaminejad; F Ajaminejad and T Mokhtari Azad; J Yavarian; K Sadeghi; N Ghavvami; N Ghavvami and T Mokhtari Azad; NZ Shafiei Jandaghi; V Salimi; Mostafa Salehi-Vaziri                                                                                                                                                                                                                                                                                                                                                                                                                                                                                                                                                              |  |
| EPI_ISL_2820339, EPI_ISL_2820341, EPI_ISL_2820342, EPI_ISL_2820343, EPI_ISL_2820345, EPI_ISL_2820350, EPI_ISL_2820353, EPI_ISL_2820366, EPI_ISL_2820374, EPI_ISL_2820430, EPI_ISL_2820459, EPI_ISL_2820462, EPI_ISL_2868394, EPI_ISL_2868395, EPI_ISL_2868397, EPI_ISL_2868399, EPI_ISL_2868400, EPI_ISL_2868401, EPI_ISL_2868402, EPI_ISL_2868403, EPI_ISL_2868405, EPI_ISL_2868406, EPI_ISL_2868407, EPI_ISL_2868408, EPI_ISL_2868409, EPI_ISL_2868410, EPI_ISL_2868413                                                                                                                                                                                                                                                                                                                                                                                                                                                                                                                                                                                                                                                                                                                                                                                                                                                                                                                                                                                                                                                                                                                                 |                                                                                        |                                                                                                                                            |                                                                                                                                                                                                                                                                                                                                                                                                                                                                                                                                                                                                                                                                                                                                                |  |
| see above                                                                                                                                                                                                                                                                                                                                                                                                                                                                                                                                                                                                                                                                                                                                                                                                                                                                                                                                                                                                                                                                                                                                                                                                                                                                                                                                                                                                                                                                                                                                                                                                 | Botswana Harvard HIV Reference Laboratory                                              | Botswana Harvard HIV Reference Laboratory                                                                                                  | Boitumelo Zuze; Botshelo Radibe; Dorcas Maruapula; Godfrey Simoonga; Joseph Makhema; Keoratlhe Ntshambiwa; Kereng Mphoyakgosi; Legodile Kooepile; Madisa Mine; Modisa Motswaledi; Mosepele Mosepele; Motlalepule L. Pone; Ontlametse T. Bareng; Roger Shapiro; Shahin Lockman; Sikhulle Moyo; Simani Gasetiwe; Thongbotho Mphoyakgosi; Wonderful T. Choga                                                                                                                                                                                                                                                                                                                                                                                      |  |
| EPI_ISL_2558054, EPI_ISL_2558056, EPI_ISL_2558058, EPI_ISL_2558059, EPI_ISL_2558062, EPI_ISL_2558063                                                                                                                                                                                                                                                                                                                                                                                                                                                                                                                                                                                                                                                                                                                                                                                                                                                                                                                                                                                                                                                                                                                                                                                                                                                                                                                                                                                                                                                                                                      | Bureau Of Quarantine (BOQ)                                                             | Philippine Genome Center                                                                                                                   | Alethea R. de Guzman; Anna Ong-Lim; Arianne A. Zamora; Asia Louisa U. Chong; Benedict A. Maralit; Candice Francheska B. Tambaoan; Carlo M. Lapid; Celia Carlos; Devon Ray Pacial; Edsel Maurice Salvaña; El King D. Morado; Elcid Aaron R. Pangilinan; Eva Maria Cutiongco-de la Paz; Francis A. Tablizo; Irish Coleen A. Asin; Jaime C. Montoya; Jan Michael C. Yap; Jo-Hannah S. Llamas; John Q. Wong; Joshua Gregor A. Dizon; Juan Antonio R. Magalang; Karol Sophia Agape R. Padilla; Kenneth M. Kim; Kris P. Punayan; Marc Edsel C. Ayes; Maria Rosario Singh-Vergeire and Cynthia P. Saloma; Maria Sofia L. Yangzon; Marissa Alejandrini; Razel Nikka M. Hao; Renato Jacinto Q. Mantaring; Rianna Patricia S. Cruz; Sheila Mae M. Araiza |  |
| EPI_ISL_2170808, EPI_ISL_2534478                                                                                                                                                                                                                                                                                                                                                                                                                                                                                                                                                                                                                                                                                                                                                                                                                                                                                                                                                                                                                                                                                                                                                                                                                                                                                                                                                                                                                                                                                                                                                                          | CAP SARRIA                                                                             | Banc de Sang i Teixits                                                                                                                     | Carlos Hobeich; Francisco Vidal; Irene Corrales; Lorena Ramirez; Maria Glòria Soria; Natàlia Comes; Nina Borràs; Noemí Gonzalez; Silvia Sauleda                                                                                                                                                                                                                                                                                                                                                                                                                                                                                                                                                                                                |  |
| EPI_ISL_2825796, EPI_ISL_2825999                                                                                                                                                                                                                                                                                                                                                                                                                                                                                                                                                                                                                                                                                                                                                                                                                                                                                                                                                                                                                                                                                                                                                                                                                                                                                                                                                                                                                                                                                                                                                                          | CDPH VBL                                                                               | California Department of Public Health                                                                                                     | CDPH-COVIDNet; UCLA Technology Center for Genomics & Bioinformatics                                                                                                                                                                                                                                                                                                                                                                                                                                                                                                                                                                                                                                                                            |  |
| EPI_ISL_2445707, EPI_ISL_2445709                                                                                                                                                                                                                                                                                                                                                                                                                                                                                                                                                                                                                                                                                                                                                                                                                                                                                                                                                                                                                                                                                                                                                                                                                                                                                                                                                                                                                                                                                                                                                                          | CEDOC                                                                                  | Instituto Nacional de Saude (INSA)                                                                                                         | Borges et al                                                                                                                                                                                                                                                                                                                                                                                                                                                                                                                                                                                                                                                                                                                                   |  |
| EPI_ISL_2386977,                                                                                                                                                                                                                                                                                                                                                                                                                                                                                                                                                                                                                                                                                                                                                                                                                                                                                                                                                                                                                                                                                                                                                                                                                                                                                                                                                                                                                                                                                                                                                                                          | CENTOGENE Frankfurt Laboratory: Niederlassung                                          | Robert Koch Institute                                                                                                                      |                                                                                                                                                                                                                                                                                                                                                                                                                                                                                                                                                                                                                                                                                                                                                |  |

|                                                                                                                                                                                                                                                                                                                                                                                                                                                                                                                                               |                                                                                                                                                                                                                                                                                                                                                                                                                                                                                                                                                                                                                                                                                                                                                                                                                                                                                                                                                                                                                                                                                                              |                                                                                                                                                                                                                                                                                                                                                                                                                                                                                                                                                                                                                                                                                                                                                                                                                                                                                                                                                                                                                                                                                                                                                                                                                                                                                                                                                                                                                                                                                                                                                                                              |                                                                                                                                                                                                                                                                                                                                                                                                                                                                                                                                                                                                                                                                                                                                                                                                                                                                                                                                                                                                                                                                                                                                                                                                                                                                                                                                                                                                                                                                                                                                                                                                                                                                                                                                                                                                                                                                                                                                                                                                                                                                                                                                                                                                                                                                                                        |  |
|-----------------------------------------------------------------------------------------------------------------------------------------------------------------------------------------------------------------------------------------------------------------------------------------------------------------------------------------------------------------------------------------------------------------------------------------------------------------------------------------------------------------------------------------------|--------------------------------------------------------------------------------------------------------------------------------------------------------------------------------------------------------------------------------------------------------------------------------------------------------------------------------------------------------------------------------------------------------------------------------------------------------------------------------------------------------------------------------------------------------------------------------------------------------------------------------------------------------------------------------------------------------------------------------------------------------------------------------------------------------------------------------------------------------------------------------------------------------------------------------------------------------------------------------------------------------------------------------------------------------------------------------------------------------------|----------------------------------------------------------------------------------------------------------------------------------------------------------------------------------------------------------------------------------------------------------------------------------------------------------------------------------------------------------------------------------------------------------------------------------------------------------------------------------------------------------------------------------------------------------------------------------------------------------------------------------------------------------------------------------------------------------------------------------------------------------------------------------------------------------------------------------------------------------------------------------------------------------------------------------------------------------------------------------------------------------------------------------------------------------------------------------------------------------------------------------------------------------------------------------------------------------------------------------------------------------------------------------------------------------------------------------------------------------------------------------------------------------------------------------------------------------------------------------------------------------------------------------------------------------------------------------------------|--------------------------------------------------------------------------------------------------------------------------------------------------------------------------------------------------------------------------------------------------------------------------------------------------------------------------------------------------------------------------------------------------------------------------------------------------------------------------------------------------------------------------------------------------------------------------------------------------------------------------------------------------------------------------------------------------------------------------------------------------------------------------------------------------------------------------------------------------------------------------------------------------------------------------------------------------------------------------------------------------------------------------------------------------------------------------------------------------------------------------------------------------------------------------------------------------------------------------------------------------------------------------------------------------------------------------------------------------------------------------------------------------------------------------------------------------------------------------------------------------------------------------------------------------------------------------------------------------------------------------------------------------------------------------------------------------------------------------------------------------------------------------------------------------------------------------------------------------------------------------------------------------------------------------------------------------------------------------------------------------------------------------------------------------------------------------------------------------------------------------------------------------------------------------------------------------------------------------------------------------------------------------------------------------------|--|
| EPI_ISL_2387117,<br>EPI_ISL_2471310,<br>EPI_ISL_2845484,<br>EPI_ISL_2845517                                                                                                                                                                                                                                                                                                                                                                                                                                                                   | Industriepark Höchst                                                                                                                                                                                                                                                                                                                                                                                                                                                                                                                                                                                                                                                                                                                                                                                                                                                                                                                                                                                                                                                                                         |                                                                                                                                                                                                                                                                                                                                                                                                                                                                                                                                                                                                                                                                                                                                                                                                                                                                                                                                                                                                                                                                                                                                                                                                                                                                                                                                                                                                                                                                                                                                                                                              |                                                                                                                                                                                                                                                                                                                                                                                                                                                                                                                                                                                                                                                                                                                                                                                                                                                                                                                                                                                                                                                                                                                                                                                                                                                                                                                                                                                                                                                                                                                                                                                                                                                                                                                                                                                                                                                                                                                                                                                                                                                                                                                                                                                                                                                                                                        |  |
| EPI_ISL_2893779<br>EPI_ISL_2289683<br>EPI_ISL_2445735,<br>EPI_ISL_2895302<br>EPI_ISL_2004296,<br>EPI_ISL_2695160<br>EPI_ISL_2887746                                                                                                                                                                                                                                                                                                                                                                                                           | CENTRE HOSPITALIER ST JOSEPH ST LUC<br>CERBALLIANCE LAURENT DU VAR<br>CH Porto - H Sto Antonio<br>CH Setubal<br>CH Tourcoing                                                                                                                                                                                                                                                                                                                                                                                                                                                                                                                                                                                                                                                                                                                                                                                                                                                                                                                                                                                 | CNR Virus des Infections Respiratoires - France SUD<br>CNR Virus des Infections Respiratoires - France SUD<br>Instituto Nacional de Saude (INSA)<br>Instituto Nacional de Saude (INSA)<br>CHU Lille - Laboratoire de Virologie                                                                                                                                                                                                                                                                                                                                                                                                                                                                                                                                                                                                                                                                                                                                                                                                                                                                                                                                                                                                                                                                                                                                                                                                                                                                                                                                                               | Antonin Bal; Bruno Lina; Gregory Destras; Gwendolyne Burfin; Hadrien Regue; Laurence Josset; Martine Valette; Quentin Semanas<br>Antonin Bal; Bruno Lina; Gregory Destras; Gwendolyne Burfin; Hadrien Regue; Laurence Josset; Martine Valette; Quentin Semanas<br>Borges et al<br>Borges et al                                                                                                                                                                                                                                                                                                                                                                                                                                                                                                                                                                                                                                                                                                                                                                                                                                                                                                                                                                                                                                                                                                                                                                                                                                                                                                                                                                                                                                                                                                                                                                                                                                                                                                                                                                                                                                                                                                                                                                                                         |  |
| EPI_ISL_2464982,<br>EPI_ISL_2465025<br>EPI_ISL_2878377                                                                                                                                                                                                                                                                                                                                                                                                                                                                                        | CH. ROBERT BALLANGER<br>CH.INTERCOMMUNAL DE CRETEIL                                                                                                                                                                                                                                                                                                                                                                                                                                                                                                                                                                                                                                                                                                                                                                                                                                                                                                                                                                                                                                                          | Department of Virology, Henri Mondor University Hospital, Assistance Publique Hôpitaux de Paris, Université Paris-Est Créteil, INSERM U955<br>Department of Virology, Henri Mondor University Hospital, Assistance Publique Hôpitaux de Paris, Université Paris-Est Créteil, INSERM U955                                                                                                                                                                                                                                                                                                                                                                                                                                                                                                                                                                                                                                                                                                                                                                                                                                                                                                                                                                                                                                                                                                                                                                                                                                                                                                     | Alexandre Soulier; Christophe Rodriguez; Elisabeth Trawinski; Guillaume Gricourt; Jean-Michel Pawlowsky; Melissa N'Debi; Slim Fourati; Vanessa Demontant<br>Alexandre Soulier; Christophe Rodriguez; Elisabeth Trawinski; Guillaume Gricourt; Jean-Michel Pawlowsky; Melissa N'Debi; Slim Fourati; Vanessa Demontant                                                                                                                                                                                                                                                                                                                                                                                                                                                                                                                                                                                                                                                                                                                                                                                                                                                                                                                                                                                                                                                                                                                                                                                                                                                                                                                                                                                                                                                                                                                                                                                                                                                                                                                                                                                                                                                                                                                                                                                   |  |
| EPI_ISL_2248799, EPI_ISL_2248815, EPI_ISL_2248821, EPI_ISL_2248831, EPI_ISL_2248833, EPI_ISL_2248834, EPI_ISL_2362089, EPI_ISL_2362091, EPI_ISL_2362092, EPI_ISL_2362096, EPI_ISL_2362097, EPI_ISL_2362100, EPI_ISL_2362102, EPI_ISL_2362103, EPI_ISL_2362106, EPI_ISL_2362115, EPI_ISL_2362117, EPI_ISL_2362118, EPI_ISL_2376421, EPI_ISL_2536049, EPI_ISL_2536050, EPI_ISL_2536052, EPI_ISL_2536058, EPI_ISL_2536059, EPI_ISL_2536060, EPI_ISL_2536066, EPI_ISL_2536067, EPI_ISL_2536068, EPI_ISL_2536075, EPI_ISL_2694930, EPI_ISL_2694932 | see above<br>CHLC<br>CHLN<br>CHMT<br>CHOR<br>CHTMAD<br>CHU DE DIJON<br>CHU LILLE<br>CHU POITIERS<br>CHU de la Réunion - Nord<br>CHUGA-IBP-laboratoire de Virologie<br>CHULN - H Santa Maria                                                                                                                                                                                                                                                                                                                                                                                                                                                                                                                                                                                                                                                                                                                                                                                                                                                                                                                  | Instituto Nacional de Saude (INSA)<br>Instituto Nacional de Saude (INSA)<br>Instituto Nacional de Saude (INSA)<br>UMR PIMIT<br>Instituto Nacional de Saude (INSA)<br>Department of Virology, Henri Mondor University Hospital, Assistance Publique Hôpitaux de Paris, Université Paris-Est Créteil, INSERM U955<br>CHU Lille - Laboratoire de Virologie<br>CHU Poitiers<br>Laboratoire de virologie, CNR arbovirus Associé, Chu de la Réunion<br>IBP-laboratoire de virologie<br>Instituto Nacional de Saude (INSA)                                                                                                                                                                                                                                                                                                                                                                                                                                                                                                                                                                                                                                                                                                                                                                                                                                                                                                                                                                                                                                                                          | Borges et al<br>Borges et al<br>Borges et al<br>Dr Camille Lebarbenchon; Dr David A Wilkinson; Dr Patrick Mavingui; Magali Turpin<br>Borges et al<br>Alexandre Soulier; Christophe Rodriguez; Elisabeth Trawinski; Guillaume Gricourt; Jean-Michel Pawlowsky; Melissa N'Debi; Slim Fourati; Vanessa Demontant<br>AIT YAHYA Emilie; ALIDJINOUE Enagnon Kazali; BOCKET Laurence; CREPIN Michel; DEMAY Christophe; ENGELMANN Ilka; GEFFROY Sandrine; GUIGON Aurélie; LAMBERT Valérie; LAZREK Mouna; NOBILLIAUX Florian; PREVOST Brigitte; TCHANTCHOU NJOSSE YANICK; THUILLIER Caroline; TINEZ Claire<br>Agnes BEBY-DEFAUX; Birama N'DIAYE; Caroline MICHAUD; Magali GARCIA; Manon PRAT; Maxime PICHON; Nicolas LEVEQUE; Valentin BON-BARET<br>Etienne Frumence; Marie-Christine Jaffar Bandjee; Nicolas Traversier; Sabrina Petit Genet<br>Alban Caporossi; Anne Signori -Schmuck; Anne-Karen Faure; Aurélie Truffot; Benjamin Nemoz; Hugo Jardin; Julien Andréani; Julien Lupo; Léa Ponderand; Pascal Poignard; Patrice Morand; Raphaëlle Germi; Sylvie Larrat<br>Borges et al                                                                                                                                                                                                                                                                                                                                                                                                                                                                                                                                                                                                                                                                                                                                                                                                                                                                                                                                                                                                                                                                                                                                                                                                                           |  |
| EPI_ISL_2102154, EPI_ISL_2622101, EPI_ISL_2686816, EPI_ISL_2820533, EPI_ISL_2820536, EPI_ISL_2868568, EPI_ISL_2868587, EPI_ISL_2868601, EPI_ISL_2868603, EPI_ISL_2868606, EPI_ISL_2868608, EPI_ISL_2868614                                                                                                                                                                                                                                                                                                                                    | see above<br>CHUV<br>CLILAB                                                                                                                                                                                                                                                                                                                                                                                                                                                                                                                                                                                                                                                                                                                                                                                                                                                                                                                                                                                                                                                                                  | Laboratory of genomics and metagenomics<br>Microbiology Department                                                                                                                                                                                                                                                                                                                                                                                                                                                                                                                                                                                                                                                                                                                                                                                                                                                                                                                                                                                                                                                                                                                                                                                                                                                                                                                                                                                                                                                                                                                           | Claire Bertelli; Damien Jacot; Gilbert Greub; Sébastien Aeby; Trestan Pillonel<br>Aida Gonzalez-Diaz; Carmen Ardanuy; Jordi Camara; Jordi Niubó; Laura Calatayud; M Angeles Domínguez; Miguel Fernandez-Huerta; Sara Marti                                                                                                                                                                                                                                                                                                                                                                                                                                                                                                                                                                                                                                                                                                                                                                                                                                                                                                                                                                                                                                                                                                                                                                                                                                                                                                                                                                                                                                                                                                                                                                                                                                                                                                                                                                                                                                                                                                                                                                                                                                                                             |  |
| EPI_ISL_2629572,<br>EPI_ISL_2676802<br>EPI_ISL_2227272<br>EPI_ISL_2227271<br>EPI_ISL_2227204,<br>EPI_ISL_2227268,<br>EPI_ISL_2227269<br>EPI_ISL_2227270<br>EPI_ISL_2156846, EPI_ISL_2373412, EPI_ISL_2373492, EPI_ISL_2661097, EPI_ISL_2775023, EPI_ISL_2775030, EPI_ISL_2775075, EPI_ISL_2775084, EPI_ISL_2775091, EPI_ISL_2775096, EPI_ISL_2775099, EPI_ISL_2775105, EPI_ISL_2775251                                                                                                                                                        | CNR Virus des Infections Respiratoires - France SUD<br>COVID-19 National Reference Laboratory, Pasteur Institute of Iran<br>COVID-19 National Reference Laboratory, Pasteur Institute of Iran<br>COVID-19 National Reference Laboratoty, Pasteur Institute of Iran<br>COVID-19 National Reference Laboratory, Pasteur Institute of Iran<br>see above<br>CSIR-Centre for Cellular and Molecular Biology<br>CSIR-National Environmental Engineering Research Institute<br>California Department of Public Health<br>California Department of Public Health Valencia Branch Laboratory (CDPH VBL)<br>Cantacuzino National Military-Medical Institute, Viral Respiratory Infections Laboratory<br>Cell-T<br>Center for Laboratory Medicine<br>Center for Virology, Medical University of Vienna<br>Centers for Disease Control, R.O.C. (Taiwan)<br>Centogene; Dr. Bauer Laboratoriums GmbH<br>Central Health Laboratory/Airport Health Laboratory<br>Centralny Szpital Kliniczny MSWiA w Warszawie<br>Centre Hospitalier Universitaire Clermont-Ferrand<br>Centro de Investigacion Biomedica de Occidente (CIBO) | CNR Virus des Infections Respiratoires - France SUD<br>Genetics Research Center, University of Social Welfare and Rehabilitation Sciences<br>Genetics Research Center, University of Social Welfare and Rehabilitation Sciences<br>Genetics Research Center, University of Social Welfare and Rehabilitation Sciences<br>Genetics Research Center, University of Social Welfare and Rehabilitation Sciences<br>Genetics Research Center, University of Social Welfare and Rehabilitation Sciences<br>CSIR-Centre for Cellular and Molecular Biology-INSACOG<br>CSIR-Centre for Cellular and Molecular Biology-INSACOG<br>California Department of Public Health<br>California Department of Public Health<br>Cantacuzino Institute Virology<br>1. National Institute of Public Health - National Institute of Hygiene, Warsaw, Poland 2. Biobank Lab, University of Lodz 3. Laboratory of Respiratory Viruses, Teaching and Clinical Center of the Medical University of Lodz<br>Center for Laboratory Medicine<br>Bergthaler laboratory, CeMM Research Center for Molecular Medicine of the Austrian Academy of Sciences<br>Centers for Disease Control, R.O.C. (Taiwan)<br>Robert Koch Institute<br>Central Health Laboratory ,Victoria Hospital, Candos,Ministry of Health and Wellness, Mauritius<br>1. Virogenetics Laboratory of Virology, Malopolska Centre of Biotechnology, Jagiellonian University. 2. Intercollegiate Faculty of Biotechnology University of Gdansk and Medical University of Gdansk<br>CHU Clermont-Ferrand, service de virologie<br>Unidad de Genomica Avanzada | Antonin Bal; Bruno Lina; Gregory Destras; Gwendolyne Burfin; Hadrien Regue; Laurence Josset; Martine Valette; Quentin Semanas<br>Hossein Najmabadi.; Kimia Kahrizi; Mahsa Tavakoli; Marzieh Mohseni; Mohammad Hassan Pouriayevali; Mostafa Salehi-Vaziri; Tahmineh Jalali; Zohreh Fattahi<br>Hossein Najmabadi.; Kimia Kahrizi; Mahsa Tavakoli; Marzieh Mohseni; Mohammad Hassan Pouriayevali; Mostafa Salehi-Vaziri; Tahmineh Jalali; Zohreh Fattahi<br>Hossein Najmabadi.; Kimia Kahrizi; Mahsa Tavakoli; Marzieh Mohseni; Mohammad Hassan Pouriayevali; Mostafa Salehi-Vaziri; Tahmineh Jalali; Zohreh Fattahi<br>Hossein Najmabadi.; Kimia Kahrizi; Mahsa Tavakoli; Marzieh Mohseni; Mohammad Hassan Pouriayevali; Mostafa Salehi-Vaziri; Tahmineh Jalali; Zohreh Fattahi<br>Amareshwar Vodapalli; Ara Sreenivas; Archana Bharadwaj Siva; B Himasri; Blessy B John; Divya Tej Sowpati; Jandhyala Sai Krishna; Karthik Bharadwaj Tallapaka; Lamuk Zaveri; Onkar Kulkarni; Payel Mukherjee; Priya Nurkurthy; Rakesh K Mishra; Sharath Chandra Thota; Shreekant Verma; Sofia Banu; Sumedha Avadhanula; Tulasi Nagabandi; Valli Nagalakshmi Undamatia; Vidhyadhari Methuku; Viswagithe S L<br>Amareshwar Vodapalli; Ara Sreenivas; Archana Bharadwaj Siva; B Himasri; Divya Tej Sowpati; Karthik Bharadwaj Tallapaka; Krishna Khairmar; Lamuk Zaveri; Onkar Kulkarni; Payel Mukherjee; Priya Nurkurthy; Rakesh K Mishra; Shreekant Verma; Sofia Banu; Sumedha Avadhanula; Tulasi Nagabandi; Valli Nagalakshmi Undamatia; Vidhyadhari Methuku<br>CDPH IDLB COVIDNet et al<br>CDPH-COVIDNet<br>Carmen Cherciu; Luiza Ustea; Mihaela Lazar; Mihaela Oprea; Nicoleta Paraschiv; Sorin Dinu<br>Dominik Strapagiel; Izabela Drózdź; Jakub Lach; Katarzyna Zacharczuk; Klaudyna Królikowska; Maciej Borowiec; Magdalena Nowakowska; Magdalena Traczyk-Borszyńska; Marcin Słomka; Marta Sobalska-Kwapis; Małgorzata Sadkowska-Todys; Tomasz Płoszaj; Tomasz Wołkowicz<br>Yannick Gerth<br>Ji-Rong Yang; Jung-Jung Mu; Ming-Tsan-Liu; Yu-Chi-Lin<br>Bahadoor BS; Jannoo N; Manraj SS; Mathur H; Patoo M; Ramuth M; Sonoo J; Sujeewon C<br>Adam Sybilski; Anna Meler; Krystyna Bienkowska-Szewczyk; Krzysztof Pyrc; Lukasz Rabalski; Maciej Kosinski; Michał Hampel; Natalia Mazur-Panasiuk; Sławomir Butkiewicz |  |
| EPI_ISL_2450030,<br>EPI_ISL_2574058,<br>EPI_ISL_2574080,<br>EPI_ISL_2671456<br>EPI_ISL_2887701<br>EPI_ISL_2705575<br>EPI_ISL_1843777,<br>EPI_ISL_1843874,<br>EPI_ISL_2123187,<br>EPI_ISL_2123202,<br>EPI_ISL_2123266<br>EPI_ISL_2834925,<br>EPI_ISL_2834927<br>EPI_ISL_1827727<br>EPI_ISL_2002644<br>EPI_ISL_2671484                                                                                                                                                                                                                          |                                                                                                                                                                                                                                                                                                                                                                                                                                                                                                                                                                                                                                                                                                                                                                                                                                                                                                                                                                                                                                                                                                              |                                                                                                                                                                                                                                                                                                                                                                                                                                                                                                                                                                                                                                                                                                                                                                                                                                                                                                                                                                                                                                                                                                                                                                                                                                                                                                                                                                                                                                                                                                                                                                                              | Bisseux Maxime; Combes Patricia; Henquell Cécile; Mirand Audrey<br>; Alejandra Garcia-Gasca; Alejandra Hernandez-Teran; Alejandro Sanchez-Flores; Alfredo Herrera-Estrella; Alicia Ocaña-Mondragon; Andreu Comas-Garcia; Angel Gustavo Salas-Lais; Antonio Loza Roman; Bernardo Martinez-Miguel; Blanca Taboada; Brenda Irasema Maldonado-Meza; Bruno Gomez-Gil; Carla Ivon Herrera-Najera; Carlos F. Arias; Celia Boukadida; Celida Duque Molina; Celida Martinez- Rodriguez; Clara Esperanza Santacruz-Tinoco; Concepcion Grajales-Muñiz; Consorcio Mexicano de Vigilancia Genomica (CoViGen-Mex). Authors (in alphabetical order): Julio Elias Alvarado-Yaah; Cristobal Chaidez-Quiroz; Daniel Fregoso-Rueda; Daniel Lira Morales; Eduardo Becerril-Vargas; Fernando Fontove-Herrera; Fidencio Mejia-Nepomuceno;                                                                                                                                                                                                                                                                                                                                                                                                                                                                                                                                                                                                                                                                                                                                                                                                                                                                                                                                                                                                                                                                                                                                                                                                                                                                                                                                                                                                                                                                                    |  |

|                                                                                                                                                                                                                                                                                                                                                                                                                                                                                                                                                                                                                                                                                                                                                                                                                                                                                                                                                                                                                                                                                                                                                                                                                                                                                                                                                                                                                                                                                                                                                                                                                                                                                                                                                                                                                                                                                                                                                                                                                                                                                                                                                                                                                                                                                                                                                                                                                                                                                                                                                                                                                                                                                                                                                                                                                                                                                                                                                                                                                                                                                                                                                                                                                                                                                                                                                                                                                                                                                                                                                                                                                                                                                                                                                                                                                                                                                                                                                                                                                                                                                                                                                                                                                                                                                                                                                                                                                                                                                                                                                                                                                                                                                                                                                                                                                                                                                                                                                                                                                                                                                                                                                                                                                                                                                                                                                                                           |                                                                                                                                                                                         |                                                                                                                                                                                         |                                                                                                                                                                                                                                                                                                                                                                                                                                                                                                                                                                                                                                                                                                                                                                                                                                                                                                                                                                                                                                                                                                                                                                                                                                                                                                                                                                                                                                                                                                                                                                                                                                           |                                                                                                                                                                                                                                                                                                      |
|-------------------------------------------------------------------------------------------------------------------------------------------------------------------------------------------------------------------------------------------------------------------------------------------------------------------------------------------------------------------------------------------------------------------------------------------------------------------------------------------------------------------------------------------------------------------------------------------------------------------------------------------------------------------------------------------------------------------------------------------------------------------------------------------------------------------------------------------------------------------------------------------------------------------------------------------------------------------------------------------------------------------------------------------------------------------------------------------------------------------------------------------------------------------------------------------------------------------------------------------------------------------------------------------------------------------------------------------------------------------------------------------------------------------------------------------------------------------------------------------------------------------------------------------------------------------------------------------------------------------------------------------------------------------------------------------------------------------------------------------------------------------------------------------------------------------------------------------------------------------------------------------------------------------------------------------------------------------------------------------------------------------------------------------------------------------------------------------------------------------------------------------------------------------------------------------------------------------------------------------------------------------------------------------------------------------------------------------------------------------------------------------------------------------------------------------------------------------------------------------------------------------------------------------------------------------------------------------------------------------------------------------------------------------------------------------------------------------------------------------------------------------------------------------------------------------------------------------------------------------------------------------------------------------------------------------------------------------------------------------------------------------------------------------------------------------------------------------------------------------------------------------------------------------------------------------------------------------------------------------------------------------------------------------------------------------------------------------------------------------------------------------------------------------------------------------------------------------------------------------------------------------------------------------------------------------------------------------------------------------------------------------------------------------------------------------------------------------------------------------------------------------------------------------------------------------------------------------------------------------------------------------------------------------------------------------------------------------------------------------------------------------------------------------------------------------------------------------------------------------------------------------------------------------------------------------------------------------------------------------------------------------------------------------------------------------------------------------------------------------------------------------------------------------------------------------------------------------------------------------------------------------------------------------------------------------------------------------------------------------------------------------------------------------------------------------------------------------------------------------------------------------------------------------------------------------------------------------------------------------------------------------------------------------------------------------------------------------------------------------------------------------------------------------------------------------------------------------------------------------------------------------------------------------------------------------------------------------------------------------------------------------------------------------------------------------------------------------------------------------------------------------|-----------------------------------------------------------------------------------------------------------------------------------------------------------------------------------------|-----------------------------------------------------------------------------------------------------------------------------------------------------------------------------------------|-------------------------------------------------------------------------------------------------------------------------------------------------------------------------------------------------------------------------------------------------------------------------------------------------------------------------------------------------------------------------------------------------------------------------------------------------------------------------------------------------------------------------------------------------------------------------------------------------------------------------------------------------------------------------------------------------------------------------------------------------------------------------------------------------------------------------------------------------------------------------------------------------------------------------------------------------------------------------------------------------------------------------------------------------------------------------------------------------------------------------------------------------------------------------------------------------------------------------------------------------------------------------------------------------------------------------------------------------------------------------------------------------------------------------------------------------------------------------------------------------------------------------------------------------------------------------------------------------------------------------------------------|------------------------------------------------------------------------------------------------------------------------------------------------------------------------------------------------------------------------------------------------------------------------------------------------------|
| Francisco Pulido; Gloria Elena Espinosa-Ayala; Gloria Maria Molina-Salinas; Gloria Vazquez; Hector Esteban Paz-Juarez; Hector Montoya-Fuentes; Helen Haydee Fernanda Ramirez-Plascencia; Irvin Gonzalez-Lopez; Jean Pierre Gonzalez; Jesus Hernandez; Joel Armando Vazquez-Perez.; Jorge Salas-Hernandez; Jose Antonio Enciso-Moreno; Jose Arturo Martinez-Orozco; Jose Esteban Muñoz-Medina; Jose de Jesus Nuñez-Contreras; Juan Bautista Chale-Dzul; Julissa Enciso-Ibarra; Luis Alberto Ochoa-Carrera; Margarita Matias-Florentino; Maria Guadalupe Santiago-Mauricio; Maria Guadalupe de Jesus Mireles-Rivera; Mario Mujica-Sanchez; Marissa Perez-Garcia; Nelly Selem-Mojica; Pavel Isa; Ricardo Ciria Merce; Ricardo Grande; Rosa Maria Gutierrez Rios; Santiago avila-Rios; Selene Zarate; Susana Lopez; Veronica Mata-Haro; Victor Eduardo Garcia-Arias; Victor Hugo Borja-Aburto                                                                                                                                                                                                                                                                                                                                                                                                                                                                                                                                                                                                                                                                                                                                                                                                                                                                                                                                                                                                                                                                                                                                                                                                                                                                                                                                                                                                                                                                                                                                                                                                                                                                                                                                                                                                                                                                                                                                                                                                                                                                                                                                                                                                                                                                                                                                                                                                                                                                                                                                                                                                                                                                                                                                                                                                                                                                                                                                                                                                                                                                                                                                                                                                                                                                                                                                                                                                                                                                                                                                                                                                                                                                                                                                                                                                                                                                                                                                                                                                                                                                                                                                                                                                                                                                                                                                                                                                                                                                                                 |                                                                                                                                                                                         |                                                                                                                                                                                         |                                                                                                                                                                                                                                                                                                                                                                                                                                                                                                                                                                                                                                                                                                                                                                                                                                                                                                                                                                                                                                                                                                                                                                                                                                                                                                                                                                                                                                                                                                                                                                                                                                           |                                                                                                                                                                                                                                                                                                      |
| EPI_ISL_2671635, EPI_ISL_2671636                                                                                                                                                                                                                                                                                                                                                                                                                                                                                                                                                                                                                                                                                                                                                                                                                                                                                                                                                                                                                                                                                                                                                                                                                                                                                                                                                                                                                                                                                                                                                                                                                                                                                                                                                                                                                                                                                                                                                                                                                                                                                                                                                                                                                                                                                                                                                                                                                                                                                                                                                                                                                                                                                                                                                                                                                                                                                                                                                                                                                                                                                                                                                                                                                                                                                                                                                                                                                                                                                                                                                                                                                                                                                                                                                                                                                                                                                                                                                                                                                                                                                                                                                                                                                                                                                                                                                                                                                                                                                                                                                                                                                                                                                                                                                                                                                                                                                                                                                                                                                                                                                                                                                                                                                                                                                                                                                          | Centro de Investigación Biomedica del Noreste (CIBIN)                                                                                                                                   | Unidad de Genomica Avanzada                                                                                                                                                             | ; Alejandra Garcia-Gasca; Alejandra Hernandez-Teran; Alejandro Sanchez-Flores; Alfredo Herrera-Estrella; Alicia Ocaña-Mondragon; Andreu Comas-Garcia; Angel Gustavo Salas-Lais; Antonio Loza Roman; Bernardo Martinez-Miguel; Blanca Taboada; Brenda Irasema Maldonado-Meza; Bruno Gomez-Gil; Carla Ivon Herrera-Najera; Carlos F. Arias; Celia Boukadida; Celida Duque Molina; Celida Martinez- Rodriguez; Clara Esperanza Santacruz-Tinoco; Concepcion Grajales-Muñiz; Consorcio Mexicano de Vigilancia Genomica (CoVGen-Mex). Authors (in alphabetical order): Julio Elias Alvarado-Yaah; Cristóbal Chaldez-Quiroz; Daniel Fregoso-Rueda; Daniel Lira Morales; Eduardo Becerril-Vargas; Fernando Fontove-Herrera; Fidencio Mejia-Nepomuceno; Francisco Pulido; Gloria Elena Espinosa-Ayala; Gloria Maria Molina-Salinas; Gloria Vazquez; Hector Esteban Paz-Juarez; Hector Montoya-Fuentes; Helen Haydee Fernanda Ramirez-Plascencia; Irvin Gonzalez-Lopez; Jean Pierre Gonzalez; Jesus Hernandez; Joel Armando Vazquez-Perez.; Jorge Salas-Hernandez; Jose Antonio Enciso-Moreno; Jose Arturo Martinez-Orozco; Jose Esteban Muñoz-Medina; Jose de Jesus Nuñez-Contreras; Juan Bautista Chale-Dzul; Julissa Enciso-Ibarra; Luis Alberto Ochoa-Carrera; Margarita Matias-Florentino; Maria Guadalupe Santiago-Mauricio; Maria Guadalupe de Jesus Mireles-Rivera; Mario Mujica-Sanchez; Marissa Perez-Garcia; Nelly Selem-Mojica; Pavel Isa; Ricardo Ciria Merce; Ricardo Grande; Rosa Maria Gutierrez Rios; Santiago avila-Rios; Selene Zarate; Susana Lopez; Veronica Mata-Haro; Victor Eduardo Garcia-Arias; Victor Hugo Borja-Aburto |                                                                                                                                                                                                                                                                                                      |
| EPI_ISL_2798753, EPI_ISL_2798754, EPI_ISL_2798755, EPI_ISL_2799000, EPI_ISL_2799099, EPI_ISL_2799114, EPI_ISL_2799137, EPI_ISL_2799152, EPI_ISL_2799171, EPI_ISL_2799172, EPI_ISL_2799198, EPI_ISL_2799200, EPI_ISL_2799206, EPI_ISL_2799215, EPI_ISL_2799230, EPI_ISL_2799236, EPI_ISL_2799240                                                                                                                                                                                                                                                                                                                                                                                                                                                                                                                                                                                                                                                                                                                                                                                                                                                                                                                                                                                                                                                                                                                                                                                                                                                                                                                                                                                                                                                                                                                                                                                                                                                                                                                                                                                                                                                                                                                                                                                                                                                                                                                                                                                                                                                                                                                                                                                                                                                                                                                                                                                                                                                                                                                                                                                                                                                                                                                                                                                                                                                                                                                                                                                                                                                                                                                                                                                                                                                                                                                                                                                                                                                                                                                                                                                                                                                                                                                                                                                                                                                                                                                                                                                                                                                                                                                                                                                                                                                                                                                                                                                                                                                                                                                                                                                                                                                                                                                                                                                                                                                                                           | see above                                                                                                                                                                               | Centrālā Laboratorija, SIA                                                                                                                                                              | Riga East University Hospital, National Microbiology Reference Laboratory; Eurofins Genomics Europe Sequencing GmbH                                                                                                                                                                                                                                                                                                                                                                                                                                                                                                                                                                                                                                                                                                                                                                                                                                                                                                                                                                                                                                                                                                                                                                                                                                                                                                                                                                                                                                                                                                                       | Arzu Alguileva; Diāna Dušacka; Dārta Pūpola; Ilva Pole; Jana Osīte; Jevgenijs Bodrenko; Jūlija Čevere; Reinis Vangravs; Reinis Zeltmats; Sergejs Nikišins; Stella Lapīņa; Ģirts Šķenders                                                                                                             |
| EPI_ISL_2228858, EPI_ISL_2464723, EPI_ISL_2795744, EPI_ISL_2795874                                                                                                                                                                                                                                                                                                                                                                                                                                                                                                                                                                                                                                                                                                                                                                                                                                                                                                                                                                                                                                                                                                                                                                                                                                                                                                                                                                                                                                                                                                                                                                                                                                                                                                                                                                                                                                                                                                                                                                                                                                                                                                                                                                                                                                                                                                                                                                                                                                                                                                                                                                                                                                                                                                                                                                                                                                                                                                                                                                                                                                                                                                                                                                                                                                                                                                                                                                                                                                                                                                                                                                                                                                                                                                                                                                                                                                                                                                                                                                                                                                                                                                                                                                                                                                                                                                                                                                                                                                                                                                                                                                                                                                                                                                                                                                                                                                                                                                                                                                                                                                                                                                                                                                                                                                                                                                                        | Cerballiance Paris IDF est Saint-Denis                                                                                                                                                  | Department of Virology, Henri Mondor University Hospital, Assistance Publique Hôpitaux de Paris, Université Paris-Est Créteil, INSERM U955                                              | Alexandre Soulier; Christophe Rodriguez; Elisabeth Trawinski; Guillaume Gricourt; Jean-Michel Pawlitsky; Melissa N'Debi; Slim Fourati; Vanessa Demontant                                                                                                                                                                                                                                                                                                                                                                                                                                                                                                                                                                                                                                                                                                                                                                                                                                                                                                                                                                                                                                                                                                                                                                                                                                                                                                                                                                                                                                                                                  |                                                                                                                                                                                                                                                                                                      |
| EPI_ISL_2646234, EPI_ISL_2646238, EPI_ISL_2646262, EPI_ISL_2646269, EPI_ISL_2652114, EPI_ISL_2652115                                                                                                                                                                                                                                                                                                                                                                                                                                                                                                                                                                                                                                                                                                                                                                                                                                                                                                                                                                                                                                                                                                                                                                                                                                                                                                                                                                                                                                                                                                                                                                                                                                                                                                                                                                                                                                                                                                                                                                                                                                                                                                                                                                                                                                                                                                                                                                                                                                                                                                                                                                                                                                                                                                                                                                                                                                                                                                                                                                                                                                                                                                                                                                                                                                                                                                                                                                                                                                                                                                                                                                                                                                                                                                                                                                                                                                                                                                                                                                                                                                                                                                                                                                                                                                                                                                                                                                                                                                                                                                                                                                                                                                                                                                                                                                                                                                                                                                                                                                                                                                                                                                                                                                                                                                                                                      | Cerballiance-IDF                                                                                                                                                                        | Cerba lab                                                                                                                                                                               | Aude Lessenne; Bénédicte Roquebert; Emmanuel Lecorche; Kader Merah; Laura Verdurme; Patrice Herisson; Sabine Trombert-Paolantoni; Stéphanie Haim-Boukobza; Thierry Collin                                                                                                                                                                                                                                                                                                                                                                                                                                                                                                                                                                                                                                                                                                                                                                                                                                                                                                                                                                                                                                                                                                                                                                                                                                                                                                                                                                                                                                                                 |                                                                                                                                                                                                                                                                                                      |
| EPI_ISL_2646255, EPI_ISL_2646258, EPI_ISL_2646261, EPI_ISL_2646278                                                                                                                                                                                                                                                                                                                                                                                                                                                                                                                                                                                                                                                                                                                                                                                                                                                                                                                                                                                                                                                                                                                                                                                                                                                                                                                                                                                                                                                                                                                                                                                                                                                                                                                                                                                                                                                                                                                                                                                                                                                                                                                                                                                                                                                                                                                                                                                                                                                                                                                                                                                                                                                                                                                                                                                                                                                                                                                                                                                                                                                                                                                                                                                                                                                                                                                                                                                                                                                                                                                                                                                                                                                                                                                                                                                                                                                                                                                                                                                                                                                                                                                                                                                                                                                                                                                                                                                                                                                                                                                                                                                                                                                                                                                                                                                                                                                                                                                                                                                                                                                                                                                                                                                                                                                                                                                        | Cerballiance-Paris                                                                                                                                                                      | Cerba lab                                                                                                                                                                               | Aude Lessenne; Bénédicte Roquebert; Emmanuel Lecorche; Kader Merah; Laura Verdurme; Patrice Herisson; Sabine Trombert-Paolantoni; Stéphanie Haim-Boukobza; Thierry Collin                                                                                                                                                                                                                                                                                                                                                                                                                                                                                                                                                                                                                                                                                                                                                                                                                                                                                                                                                                                                                                                                                                                                                                                                                                                                                                                                                                                                                                                                 |                                                                                                                                                                                                                                                                                                      |
| EPI_ISL_2646274, EPI_ISL_2646277                                                                                                                                                                                                                                                                                                                                                                                                                                                                                                                                                                                                                                                                                                                                                                                                                                                                                                                                                                                                                                                                                                                                                                                                                                                                                                                                                                                                                                                                                                                                                                                                                                                                                                                                                                                                                                                                                                                                                                                                                                                                                                                                                                                                                                                                                                                                                                                                                                                                                                                                                                                                                                                                                                                                                                                                                                                                                                                                                                                                                                                                                                                                                                                                                                                                                                                                                                                                                                                                                                                                                                                                                                                                                                                                                                                                                                                                                                                                                                                                                                                                                                                                                                                                                                                                                                                                                                                                                                                                                                                                                                                                                                                                                                                                                                                                                                                                                                                                                                                                                                                                                                                                                                                                                                                                                                                                                          | Cerballiance-Provence                                                                                                                                                                   | Cerba lab                                                                                                                                                                               | Aude Lessenne; Bénédicte Roquebert; Emmanuel Lecorche; Kader Merah; Laura Verdurme; Patrice Herisson; Sabine Trombert-Paolantoni; Stéphanie Haim-Boukobza; Thierry Collin                                                                                                                                                                                                                                                                                                                                                                                                                                                                                                                                                                                                                                                                                                                                                                                                                                                                                                                                                                                                                                                                                                                                                                                                                                                                                                                                                                                                                                                                 |                                                                                                                                                                                                                                                                                                      |
| EPI_ISL_2646253                                                                                                                                                                                                                                                                                                                                                                                                                                                                                                                                                                                                                                                                                                                                                                                                                                                                                                                                                                                                                                                                                                                                                                                                                                                                                                                                                                                                                                                                                                                                                                                                                                                                                                                                                                                                                                                                                                                                                                                                                                                                                                                                                                                                                                                                                                                                                                                                                                                                                                                                                                                                                                                                                                                                                                                                                                                                                                                                                                                                                                                                                                                                                                                                                                                                                                                                                                                                                                                                                                                                                                                                                                                                                                                                                                                                                                                                                                                                                                                                                                                                                                                                                                                                                                                                                                                                                                                                                                                                                                                                                                                                                                                                                                                                                                                                                                                                                                                                                                                                                                                                                                                                                                                                                                                                                                                                                                           | Cerballiance-Pyrénées                                                                                                                                                                   | Cerba lab                                                                                                                                                                               | Aude Lessenne; Bénédicte Roquebert; Emmanuel Lecorche; Kader Merah; Laura Verdurme; Patrice Herisson; Sabine Trombert-Paolantoni; Stéphanie Haim-Boukobza; Thierry Collin                                                                                                                                                                                                                                                                                                                                                                                                                                                                                                                                                                                                                                                                                                                                                                                                                                                                                                                                                                                                                                                                                                                                                                                                                                                                                                                                                                                                                                                                 |                                                                                                                                                                                                                                                                                                      |
| EPI_ISL_2337257                                                                                                                                                                                                                                                                                                                                                                                                                                                                                                                                                                                                                                                                                                                                                                                                                                                                                                                                                                                                                                                                                                                                                                                                                                                                                                                                                                                                                                                                                                                                                                                                                                                                                                                                                                                                                                                                                                                                                                                                                                                                                                                                                                                                                                                                                                                                                                                                                                                                                                                                                                                                                                                                                                                                                                                                                                                                                                                                                                                                                                                                                                                                                                                                                                                                                                                                                                                                                                                                                                                                                                                                                                                                                                                                                                                                                                                                                                                                                                                                                                                                                                                                                                                                                                                                                                                                                                                                                                                                                                                                                                                                                                                                                                                                                                                                                                                                                                                                                                                                                                                                                                                                                                                                                                                                                                                                                                           | Chiba Prefectural Institute of Public Health                                                                                                                                            | Pathogen Genomics Center, National Institute of Infectious Diseases                                                                                                                     | Kentaro Itokawa; Makoto Kuroda; Masanori Hashino; Rina Tanaka; Tsuyoshi Sekizuka                                                                                                                                                                                                                                                                                                                                                                                                                                                                                                                                                                                                                                                                                                                                                                                                                                                                                                                                                                                                                                                                                                                                                                                                                                                                                                                                                                                                                                                                                                                                                          |                                                                                                                                                                                                                                                                                                      |
| EPI_ISL_1970347                                                                                                                                                                                                                                                                                                                                                                                                                                                                                                                                                                                                                                                                                                                                                                                                                                                                                                                                                                                                                                                                                                                                                                                                                                                                                                                                                                                                                                                                                                                                                                                                                                                                                                                                                                                                                                                                                                                                                                                                                                                                                                                                                                                                                                                                                                                                                                                                                                                                                                                                                                                                                                                                                                                                                                                                                                                                                                                                                                                                                                                                                                                                                                                                                                                                                                                                                                                                                                                                                                                                                                                                                                                                                                                                                                                                                                                                                                                                                                                                                                                                                                                                                                                                                                                                                                                                                                                                                                                                                                                                                                                                                                                                                                                                                                                                                                                                                                                                                                                                                                                                                                                                                                                                                                                                                                                                                                           | Chongqing Yuzhong District Center For Disease Control And Prevention                                                                                                                    | Chongqing Municipal Center for Disease Control and Prevention                                                                                                                           | Hua Ling; Jiaqi Li; Mingyue Wang; Rong Rong; Sheng Ye; Shuang Chen; Wenge Tang; Yingbing Zhou; Yun Tang; Yuyue Luo; Zhangping Tan; Zhen Yu                                                                                                                                                                                                                                                                                                                                                                                                                                                                                                                                                                                                                                                                                                                                                                                                                                                                                                                                                                                                                                                                                                                                                                                                                                                                                                                                                                                                                                                                                                |                                                                                                                                                                                                                                                                                                      |
| EPI_ISL_2433619, EPI_ISL_2433620, EPI_ISL_2433621, EPI_ISL_2433622, EPI_ISL_2433623, EPI_ISL_2433624, EPI_ISL_2433625, EPI_ISL_2433626, EPI_ISL_2433627, EPI_ISL_2433628, EPI_ISL_2433629, EPI_ISL_2433630, EPI_ISL_2433631, EPI_ISL_2433632, EPI_ISL_2433633, EPI_ISL_2433634, EPI_ISL_2433635, EPI_ISL_2433636, EPI_ISL_2433637, EPI_ISL_2433638, EPI_ISL_2433639, EPI_ISL_2433640, EPI_ISL_2433641, EPI_ISL_2433642, EPI_ISL_2433643, EPI_ISL_2433644, EPI_ISL_2433645                                                                                                                                                                                                                                                                                                                                                                                                                                                                                                                                                                                                                                                                                                                                                                                                                                                                                                                                                                                                                                                                                                                                                                                                                                                                                                                                                                                                                                                                                                                                                                                                                                                                                                                                                                                                                                                                                                                                                                                                                                                                                                                                                                                                                                                                                                                                                                                                                                                                                                                                                                                                                                                                                                                                                                                                                                                                                                                                                                                                                                                                                                                                                                                                                                                                                                                                                                                                                                                                                                                                                                                                                                                                                                                                                                                                                                                                                                                                                                                                                                                                                                                                                                                                                                                                                                                                                                                                                                                                                                                                                                                                                                                                                                                                                                                                                                                                                                                 | see above                                                                                                                                                                               | Chulabhorn Hospital                                                                                                                                                                     | Division of Genomic Medicine and Innovation support,Department of Medical Sciences, Ministry of Public Health, Thailand                                                                                                                                                                                                                                                                                                                                                                                                                                                                                                                                                                                                                                                                                                                                                                                                                                                                                                                                                                                                                                                                                                                                                                                                                                                                                                                                                                                                                                                                                                                   | Archawin Rojanawiwat; Jirapha Pakdee; Natthakul Bunneang; Nuanjun Wichuchinda; Penpittha Thawong; Pilailuk Akkapaiboon Okada; Pundharika Piboonsiri; Surakameth Mahasirimongkol; Waritta Sawaengdee                                                                                                  |
| EPI_ISL_2840598, EPI_ISL_2840599, EPI_ISL_2840600, EPI_ISL_2877030, EPI_ISL_2877031                                                                                                                                                                                                                                                                                                                                                                                                                                                                                                                                                                                                                                                                                                                                                                                                                                                                                                                                                                                                                                                                                                                                                                                                                                                                                                                                                                                                                                                                                                                                                                                                                                                                                                                                                                                                                                                                                                                                                                                                                                                                                                                                                                                                                                                                                                                                                                                                                                                                                                                                                                                                                                                                                                                                                                                                                                                                                                                                                                                                                                                                                                                                                                                                                                                                                                                                                                                                                                                                                                                                                                                                                                                                                                                                                                                                                                                                                                                                                                                                                                                                                                                                                                                                                                                                                                                                                                                                                                                                                                                                                                                                                                                                                                                                                                                                                                                                                                                                                                                                                                                                                                                                                                                                                                                                                                       | Chulabhorn Hospital                                                                                                                                                                     | National Institute of Health, Department of Medical Sciences, Ministry of Public Health, Thailand                                                                                       | ; Natchaya Khidsang; Natchaya Khidsang; Nuttida Thongpramul; Pakorn Piromtong; Pilailuk Okada; Ratana Tacharoenmuang; Siripaporn Phuyung; Sittiporn Parmmen; Sunthareeya Waicharen; Thanutsapa Thanadachakul; Warawan Wongboot; sirikandana wimal                                                                                                                                                                                                                                                                                                                                                                                                                                                                                                                                                                                                                                                                                                                                                                                                                                                                                                                                                                                                                                                                                                                                                                                                                                                                                                                                                                                         |                                                                                                                                                                                                                                                                                                      |
| EPI_ISL_2450544, EPI_ISL_2450554, EPI_ISL_2450563, EPI_ISL_2450565, EPI_ISL_2523808, EPI_ISL_2523821, EPI_ISL_2523836                                                                                                                                                                                                                                                                                                                                                                                                                                                                                                                                                                                                                                                                                                                                                                                                                                                                                                                                                                                                                                                                                                                                                                                                                                                                                                                                                                                                                                                                                                                                                                                                                                                                                                                                                                                                                                                                                                                                                                                                                                                                                                                                                                                                                                                                                                                                                                                                                                                                                                                                                                                                                                                                                                                                                                                                                                                                                                                                                                                                                                                                                                                                                                                                                                                                                                                                                                                                                                                                                                                                                                                                                                                                                                                                                                                                                                                                                                                                                                                                                                                                                                                                                                                                                                                                                                                                                                                                                                                                                                                                                                                                                                                                                                                                                                                                                                                                                                                                                                                                                                                                                                                                                                                                                                                                     | see above                                                                                                                                                                               | City Hospital No 40                                                                                                                                                                     | WHO National Influenza Centre Russian Federation                                                                                                                                                                                                                                                                                                                                                                                                                                                                                                                                                                                                                                                                                                                                                                                                                                                                                                                                                                                                                                                                                                                                                                                                                                                                                                                                                                                                                                                                                                                                                                                          | Andrey Komissarov; Artem Fadeev; Daria Danilenko; Dmitry Lioznov; Elena Nabieva; Georgii Bazykin; Kirill Varchenko; Ksenia Safina; Kseniya Komissarova; Maria Pisareva; Maria Timofeeva; Mikhail Bakaev; Nikita Yolshin; Olga Shneider; Oula Mansour; Sergey Scherbak; Tamila Musaeva; Veronika Eder |
| EPI_ISL_2264591, EPI_ISL_2652215                                                                                                                                                                                                                                                                                                                                                                                                                                                                                                                                                                                                                                                                                                                                                                                                                                                                                                                                                                                                                                                                                                                                                                                                                                                                                                                                                                                                                                                                                                                                                                                                                                                                                                                                                                                                                                                                                                                                                                                                                                                                                                                                                                                                                                                                                                                                                                                                                                                                                                                                                                                                                                                                                                                                                                                                                                                                                                                                                                                                                                                                                                                                                                                                                                                                                                                                                                                                                                                                                                                                                                                                                                                                                                                                                                                                                                                                                                                                                                                                                                                                                                                                                                                                                                                                                                                                                                                                                                                                                                                                                                                                                                                                                                                                                                                                                                                                                                                                                                                                                                                                                                                                                                                                                                                                                                                                                          | Clemenshospital - Alexianer Clemenshospital Münster                                                                                                                                     | Robert Koch Institute                                                                                                                                                                   | Carmen Cherciu; Luiza Ustea; Mihaela Lazar; Mihaela Oprea; Nicoleta Paraschiv; Sorin Dinu                                                                                                                                                                                                                                                                                                                                                                                                                                                                                                                                                                                                                                                                                                                                                                                                                                                                                                                                                                                                                                                                                                                                                                                                                                                                                                                                                                                                                                                                                                                                                 |                                                                                                                                                                                                                                                                                                      |
| EPI_ISL_2100243, EPI_ISL_2100244, EPI_ISL_2100245, EPI_ISL_2100246, EPI_ISL_2100247                                                                                                                                                                                                                                                                                                                                                                                                                                                                                                                                                                                                                                                                                                                                                                                                                                                                                                                                                                                                                                                                                                                                                                                                                                                                                                                                                                                                                                                                                                                                                                                                                                                                                                                                                                                                                                                                                                                                                                                                                                                                                                                                                                                                                                                                                                                                                                                                                                                                                                                                                                                                                                                                                                                                                                                                                                                                                                                                                                                                                                                                                                                                                                                                                                                                                                                                                                                                                                                                                                                                                                                                                                                                                                                                                                                                                                                                                                                                                                                                                                                                                                                                                                                                                                                                                                                                                                                                                                                                                                                                                                                                                                                                                                                                                                                                                                                                                                                                                                                                                                                                                                                                                                                                                                                                                                       | Clinical Hospital of Infectious and Tropical Diseases "Dr. Victor Babes"                                                                                                                | Cantacuzino Institute Virology                                                                                                                                                          | Carmen Cherciu; Mihaela Lazar; Mihaela Oprea; Sorin Dinu                                                                                                                                                                                                                                                                                                                                                                                                                                                                                                                                                                                                                                                                                                                                                                                                                                                                                                                                                                                                                                                                                                                                                                                                                                                                                                                                                                                                                                                                                                                                                                                  |                                                                                                                                                                                                                                                                                                      |
| EPI_ISL_2835648, EPI_ISL_2835685                                                                                                                                                                                                                                                                                                                                                                                                                                                                                                                                                                                                                                                                                                                                                                                                                                                                                                                                                                                                                                                                                                                                                                                                                                                                                                                                                                                                                                                                                                                                                                                                                                                                                                                                                                                                                                                                                                                                                                                                                                                                                                                                                                                                                                                                                                                                                                                                                                                                                                                                                                                                                                                                                                                                                                                                                                                                                                                                                                                                                                                                                                                                                                                                                                                                                                                                                                                                                                                                                                                                                                                                                                                                                                                                                                                                                                                                                                                                                                                                                                                                                                                                                                                                                                                                                                                                                                                                                                                                                                                                                                                                                                                                                                                                                                                                                                                                                                                                                                                                                                                                                                                                                                                                                                                                                                                                                          | Clinical Microbiology Laboratory, Faculty of Medicine, Universitas Indonesia                                                                                                            | Faculty of Medicine, Universitas Indonesia                                                                                                                                              | Andi Yasmon; Anis Karuniawati; Ari Fahrial Syam; Badriul Hegar; Beti Ernawati; Budi Wiweko; Fadilah; Fera Ibrahim; Fitriyah; Hana Apsari Pawestri; Khaerunnisa Anbar Istiadi; Linda Erlina; Pratiwi Sudarmono; Rafika Indah Paramita; Vivi Setiawaty; Yulia Rosa                                                                                                                                                                                                                                                                                                                                                                                                                                                                                                                                                                                                                                                                                                                                                                                                                                                                                                                                                                                                                                                                                                                                                                                                                                                                                                                                                                          |                                                                                                                                                                                                                                                                                                      |
| EPI_ISL_1833679, EPI_ISL_1993840, EPI_ISL_1993870, EPI_ISL_1993872, EPI_ISL_1993906, EPI_ISL_2367243, EPI_ISL_2408445, EPI_ISL_2466573, EPI_ISL_2610961, EPI_ISL_2610993, EPI_ISL_2611003, EPI_ISL_2652262                                                                                                                                                                                                                                                                                                                                                                                                                                                                                                                                                                                                                                                                                                                                                                                                                                                                                                                                                                                                                                                                                                                                                                                                                                                                                                                                                                                                                                                                                                                                                                                                                                                                                                                                                                                                                                                                                                                                                                                                                                                                                                                                                                                                                                                                                                                                                                                                                                                                                                                                                                                                                                                                                                                                                                                                                                                                                                                                                                                                                                                                                                                                                                                                                                                                                                                                                                                                                                                                                                                                                                                                                                                                                                                                                                                                                                                                                                                                                                                                                                                                                                                                                                                                                                                                                                                                                                                                                                                                                                                                                                                                                                                                                                                                                                                                                                                                                                                                                                                                                                                                                                                                                                                | see above                                                                                                                                                                               | Clinical Virology                                                                                                                                                                       | Clinical Bacteriology                                                                                                                                                                                                                                                                                                                                                                                                                                                                                                                                                                                                                                                                                                                                                                                                                                                                                                                                                                                                                                                                                                                                                                                                                                                                                                                                                                                                                                                                                                                                                                                                                     | Adrian Egli; Alfredo Mari; Fanny Wegner; Hans Hirsch; Helena MB Seth-Smith; Julia Bielicki; Karoline Leuzinger; Madlen Stange; Manuel Battegay; Tim Roloff                                                                                                                                           |
| EPI_ISL_2427389, EPI_ISL_2492438, EPI_ISL_2638046, EPI_ISL_2885681                                                                                                                                                                                                                                                                                                                                                                                                                                                                                                                                                                                                                                                                                                                                                                                                                                                                                                                                                                                                                                                                                                                                                                                                                                                                                                                                                                                                                                                                                                                                                                                                                                                                                                                                                                                                                                                                                                                                                                                                                                                                                                                                                                                                                                                                                                                                                                                                                                                                                                                                                                                                                                                                                                                                                                                                                                                                                                                                                                                                                                                                                                                                                                                                                                                                                                                                                                                                                                                                                                                                                                                                                                                                                                                                                                                                                                                                                                                                                                                                                                                                                                                                                                                                                                                                                                                                                                                                                                                                                                                                                                                                                                                                                                                                                                                                                                                                                                                                                                                                                                                                                                                                                                                                                                                                                                                        | Clinique Saint-Pierre Ottignies                                                                                                                                                         | UCLouvain/REC/MBLG<br>Benoit Kabamba Mukadi; Bertrand Bearzatto; Jean Ruelle; Ophélie Simon                                                                                             |                                                                                                                                                                                                                                                                                                                                                                                                                                                                                                                                                                                                                                                                                                                                                                                                                                                                                                                                                                                                                                                                                                                                                                                                                                                                                                                                                                                                                                                                                                                                                                                                                                           |                                                                                                                                                                                                                                                                                                      |
| EPI_ISL_1935601, EPI_ISL_2427353, EPI_ISL_2492431, EPI_ISL_2492433, EPI_ISL_2492436, EPI_ISL_2626021, EPI_ISL_2626037, EPI_ISL_2778026, EPI_ISL_2778040, EPI_ISL_2778041, EPI_ISL_2778047, EPI_ISL_2885626, EPI_ISL_2885638, EPI_ISL_2885663                                                                                                                                                                                                                                                                                                                                                                                                                                                                                                                                                                                                                                                                                                                                                                                                                                                                                                                                                                                                                                                                                                                                                                                                                                                                                                                                                                                                                                                                                                                                                                                                                                                                                                                                                                                                                                                                                                                                                                                                                                                                                                                                                                                                                                                                                                                                                                                                                                                                                                                                                                                                                                                                                                                                                                                                                                                                                                                                                                                                                                                                                                                                                                                                                                                                                                                                                                                                                                                                                                                                                                                                                                                                                                                                                                                                                                                                                                                                                                                                                                                                                                                                                                                                                                                                                                                                                                                                                                                                                                                                                                                                                                                                                                                                                                                                                                                                                                                                                                                                                                                                                                                                              | see above                                                                                                                                                                               | Cliniques universitaires Saint-Luc                                                                                                                                                      | UCLouvain/REC/MBLG                                                                                                                                                                                                                                                                                                                                                                                                                                                                                                                                                                                                                                                                                                                                                                                                                                                                                                                                                                                                                                                                                                                                                                                                                                                                                                                                                                                                                                                                                                                                                                                                                        | Benoit Kabamba Mukadi; Bertrand Bearzatto; Eleonore Ngyuvula; Jean Ruelle; Ophélie Simon                                                                                                                                                                                                             |
| EPI_ISL_2469771, EPI_ISL_2469774, EPI_ISL_2469779                                                                                                                                                                                                                                                                                                                                                                                                                                                                                                                                                                                                                                                                                                                                                                                                                                                                                                                                                                                                                                                                                                                                                                                                                                                                                                                                                                                                                                                                                                                                                                                                                                                                                                                                                                                                                                                                                                                                                                                                                                                                                                                                                                                                                                                                                                                                                                                                                                                                                                                                                                                                                                                                                                                                                                                                                                                                                                                                                                                                                                                                                                                                                                                                                                                                                                                                                                                                                                                                                                                                                                                                                                                                                                                                                                                                                                                                                                                                                                                                                                                                                                                                                                                                                                                                                                                                                                                                                                                                                                                                                                                                                                                                                                                                                                                                                                                                                                                                                                                                                                                                                                                                                                                                                                                                                                                                         | Corona-Testzentrum ifp Institut für Produktqualität GmbH                                                                                                                                | Robert Koch Institute                                                                                                                                                                   |                                                                                                                                                                                                                                                                                                                                                                                                                                                                                                                                                                                                                                                                                                                                                                                                                                                                                                                                                                                                                                                                                                                                                                                                                                                                                                                                                                                                                                                                                                                                                                                                                                           |                                                                                                                                                                                                                                                                                                      |
| EPI_ISL_2507326, EPI_ISL_2839783                                                                                                                                                                                                                                                                                                                                                                                                                                                                                                                                                                                                                                                                                                                                                                                                                                                                                                                                                                                                                                                                                                                                                                                                                                                                                                                                                                                                                                                                                                                                                                                                                                                                                                                                                                                                                                                                                                                                                                                                                                                                                                                                                                                                                                                                                                                                                                                                                                                                                                                                                                                                                                                                                                                                                                                                                                                                                                                                                                                                                                                                                                                                                                                                                                                                                                                                                                                                                                                                                                                                                                                                                                                                                                                                                                                                                                                                                                                                                                                                                                                                                                                                                                                                                                                                                                                                                                                                                                                                                                                                                                                                                                                                                                                                                                                                                                                                                                                                                                                                                                                                                                                                                                                                                                                                                                                                                          | Curative Labs                                                                                                                                                                           | Curative Labs                                                                                                                                                                           |                                                                                                                                                                                                                                                                                                                                                                                                                                                                                                                                                                                                                                                                                                                                                                                                                                                                                                                                                                                                                                                                                                                                                                                                                                                                                                                                                                                                                                                                                                                                                                                                                                           |                                                                                                                                                                                                                                                                                                      |
| EPI_ISL_2868918                                                                                                                                                                                                                                                                                                                                                                                                                                                                                                                                                                                                                                                                                                                                                                                                                                                                                                                                                                                                                                                                                                                                                                                                                                                                                                                                                                                                                                                                                                                                                                                                                                                                                                                                                                                                                                                                                                                                                                                                                                                                                                                                                                                                                                                                                                                                                                                                                                                                                                                                                                                                                                                                                                                                                                                                                                                                                                                                                                                                                                                                                                                                                                                                                                                                                                                                                                                                                                                                                                                                                                                                                                                                                                                                                                                                                                                                                                                                                                                                                                                                                                                                                                                                                                                                                                                                                                                                                                                                                                                                                                                                                                                                                                                                                                                                                                                                                                                                                                                                                                                                                                                                                                                                                                                                                                                                                                           | DINKES Kab Bogor                                                                                                                                                                        | National Institute of Health Research and Development                                                                                                                                   |                                                                                                                                                                                                                                                                                                                                                                                                                                                                                                                                                                                                                                                                                                                                                                                                                                                                                                                                                                                                                                                                                                                                                                                                                                                                                                                                                                                                                                                                                                                                                                                                                                           |                                                                                                                                                                                                                                                                                                      |
| EPI_ISL_2845578                                                                                                                                                                                                                                                                                                                                                                                                                                                                                                                                                                                                                                                                                                                                                                                                                                                                                                                                                                                                                                                                                                                                                                                                                                                                                                                                                                                                                                                                                                                                                                                                                                                                                                                                                                                                                                                                                                                                                                                                                                                                                                                                                                                                                                                                                                                                                                                                                                                                                                                                                                                                                                                                                                                                                                                                                                                                                                                                                                                                                                                                                                                                                                                                                                                                                                                                                                                                                                                                                                                                                                                                                                                                                                                                                                                                                                                                                                                                                                                                                                                                                                                                                                                                                                                                                                                                                                                                                                                                                                                                                                                                                                                                                                                                                                                                                                                                                                                                                                                                                                                                                                                                                                                                                                                                                                                                                                           | DKMS Life Science Lab GmbH Dresden                                                                                                                                                      | Robert Koch Institute                                                                                                                                                                   |                                                                                                                                                                                                                                                                                                                                                                                                                                                                                                                                                                                                                                                                                                                                                                                                                                                                                                                                                                                                                                                                                                                                                                                                                                                                                                                                                                                                                                                                                                                                                                                                                                           |                                                                                                                                                                                                                                                                                                      |
| EPI_ISL_1337507                                                                                                                                                                                                                                                                                                                                                                                                                                                                                                                                                                                                                                                                                                                                                                                                                                                                                                                                                                                                                                                                                                                                                                                                                                                                                                                                                                                                                                                                                                                                                                                                                                                                                                                                                                                                                                                                                                                                                                                                                                                                                                                                                                                                                                                                                                                                                                                                                                                                                                                                                                                                                                                                                                                                                                                                                                                                                                                                                                                                                                                                                                                                                                                                                                                                                                                                                                                                                                                                                                                                                                                                                                                                                                                                                                                                                                                                                                                                                                                                                                                                                                                                                                                                                                                                                                                                                                                                                                                                                                                                                                                                                                                                                                                                                                                                                                                                                                                                                                                                                                                                                                                                                                                                                                                                                                                                                                           | DOHMH Corona                                                                                                                                                                            | New York City Public Health Laboratory                                                                                                                                                  |                                                                                                                                                                                                                                                                                                                                                                                                                                                                                                                                                                                                                                                                                                                                                                                                                                                                                                                                                                                                                                                                                                                                                                                                                                                                                                                                                                                                                                                                                                                                                                                                                                           |                                                                                                                                                                                                                                                                                                      |
| EPI_ISL_2728324                                                                                                                                                                                                                                                                                                                                                                                                                                                                                                                                                                                                                                                                                                                                                                                                                                                                                                                                                                                                                                                                                                                                                                                                                                                                                                                                                                                                                                                                                                                                                                                                                                                                                                                                                                                                                                                                                                                                                                                                                                                                                                                                                                                                                                                                                                                                                                                                                                                                                                                                                                                                                                                                                                                                                                                                                                                                                                                                                                                                                                                                                                                                                                                                                                                                                                                                                                                                                                                                                                                                                                                                                                                                                                                                                                                                                                                                                                                                                                                                                                                                                                                                                                                                                                                                                                                                                                                                                                                                                                                                                                                                                                                                                                                                                                                                                                                                                                                                                                                                                                                                                                                                                                                                                                                                                                                                                                           | DSU HASSAN                                                                                                                                                                              | INSACOG-KA, NIMHANS                                                                                                                                                                     |                                                                                                                                                                                                                                                                                                                                                                                                                                                                                                                                                                                                                                                                                                                                                                                                                                                                                                                                                                                                                                                                                                                                                                                                                                                                                                                                                                                                                                                                                                                                                                                                                                           |                                                                                                                                                                                                                                                                                                      |
| EPI_ISL_2482761, EPI_ISL_2893793                                                                                                                                                                                                                                                                                                                                                                                                                                                                                                                                                                                                                                                                                                                                                                                                                                                                                                                                                                                                                                                                                                                                                                                                                                                                                                                                                                                                                                                                                                                                                                                                                                                                                                                                                                                                                                                                                                                                                                                                                                                                                                                                                                                                                                                                                                                                                                                                                                                                                                                                                                                                                                                                                                                                                                                                                                                                                                                                                                                                                                                                                                                                                                                                                                                                                                                                                                                                                                                                                                                                                                                                                                                                                                                                                                                                                                                                                                                                                                                                                                                                                                                                                                                                                                                                                                                                                                                                                                                                                                                                                                                                                                                                                                                                                                                                                                                                                                                                                                                                                                                                                                                                                                                                                                                                                                                                                          | DYOMEDEA-LABORATOIRE DE LA SAUVEGARDE                                                                                                                                                   | CNR Virus des Infections Respiratoires - France SUD                                                                                                                                     |                                                                                                                                                                                                                                                                                                                                                                                                                                                                                                                                                                                                                                                                                                                                                                                                                                                                                                                                                                                                                                                                                                                                                                                                                                                                                                                                                                                                                                                                                                                                                                                                                                           |                                                                                                                                                                                                                                                                                                      |
| EPI_ISL_2319006, EPI_ISL_2319007                                                                                                                                                                                                                                                                                                                                                                                                                                                                                                                                                                                                                                                                                                                                                                                                                                                                                                                                                                                                                                                                                                                                                                                                                                                                                                                                                                                                                                                                                                                                                                                                                                                                                                                                                                                                                                                                                                                                                                                                                                                                                                                                                                                                                                                                                                                                                                                                                                                                                                                                                                                                                                                                                                                                                                                                                                                                                                                                                                                                                                                                                                                                                                                                                                                                                                                                                                                                                                                                                                                                                                                                                                                                                                                                                                                                                                                                                                                                                                                                                                                                                                                                                                                                                                                                                                                                                                                                                                                                                                                                                                                                                                                                                                                                                                                                                                                                                                                                                                                                                                                                                                                                                                                                                                                                                                                                                          | Department for Virology, Molecular Biology and Genome Research, R. G. Lugar Center for Public Health Research, National Center for Disease Control and Public Health (NCDC) of Georgia. | Department for Virology, Molecular Biology and Genome Research, R. G. Lugar Center for Public Health Research, National Center for Disease Control and Public Health (NCDC) of Georgia. | Adam Kotorashvili; Amiran Gamkrelidze.; Ana Pakpiari; Ann Machabishvili; Anna Kasradze; Davit Tsaguria; Ekaterine Khmaladze; Ekaterine Zangaladze; Ekaterine Zhghenti; Giorgi Gogoladze; Giorgi Tomashvili; Gvantsa Brachveli; Gvantsa Chanturia; Irma Burjanadze; Ketevan Sidamonidze; Khatuna Zakhashvili; Lela Sabadze; Lela Urushadze; Magda Dgebadze; Maia Alkhashvili; Mari Gavashelidze; Mariam Zakalashvili; Marine Murtskhvaladze; Meri Pantsulaia; Nato Kotaria; Nino Berishvili; Paata Imnadze; Roena Sukhashvili; Tamar Jashlishvili; Tata Imnadze; Tea Tvedoradze                                                                                                                                                                                                                                                                                                                                                                                                                                                                                                                                                                                                                                                                                                                                                                                                                                                                                                                                                                                                                                                            |                                                                                                                                                                                                                                                                                                      |
| EPI_ISL_2266083                                                                                                                                                                                                                                                                                                                                                                                                                                                                                                                                                                                                                                                                                                                                                                                                                                                                                                                                                                                                                                                                                                                                                                                                                                                                                                                                                                                                                                                                                                                                                                                                                                                                                                                                                                                                                                                                                                                                                                                                                                                                                                                                                                                                                                                                                                                                                                                                                                                                                                                                                                                                                                                                                                                                                                                                                                                                                                                                                                                                                                                                                                                                                                                                                                                                                                                                                                                                                                                                                                                                                                                                                                                                                                                                                                                                                                                                                                                                                                                                                                                                                                                                                                                                                                                                                                                                                                                                                                                                                                                                                                                                                                                                                                                                                                                                                                                                                                                                                                                                                                                                                                                                                                                                                                                                                                                                                                           | Department für Labormedizin Abteilung III Bereich Molekulare Diagnostik Universitätsklinikum Halle(Saale)                                                                               | Robert Koch Institute                                                                                                                                                                   |                                                                                                                                                                                                                                                                                                                                                                                                                                                                                                                                                                                                                                                                                                                                                                                                                                                                                                                                                                                                                                                                                                                                                                                                                                                                                                                                                                                                                                                                                                                                                                                                                                           |                                                                                                                                                                                                                                                                                                      |
| EPI_ISL_2723562, EPI_ISL_2723563, EPI_ISL_2723564, EPI_ISL_2834002, EPI_ISL_2834003, EPI_ISL_2834004, EPI_ISL_2840854, EPI_ISL_2840855, EPI_ISL_2840856, EPI_ISL_2840857, EPI_ISL_2840858, EPI_ISL_2840859, EPI_ISL_2840860, EPI_ISL_2863929, EPI_ISL_2863930, EPI_ISL_2863931, EPI_ISL_2863932, EPI_ISL_2863933, EPI_ISL_2863934, EPI_ISL_2863935, EPI_ISL_2893772, EPI_ISL_2893773, EPI_ISL_2893774, EPI_ISL_2893775, EPI_ISL_2893776, EPI_ISL_2893777, EPI_ISL_2893778, EPI_ISL_2896214, EPI_ISL_2896215, EPI_ISL_2896216, EPI_ISL_2896217, EPI_ISL_2896218, EPI_ISL_2896219, EPI_ISL_2896220, EPI_ISL_2896221, EPI_ISL_2896222, EPI_ISL_2896224, EPI_ISL_2896226, EPI_ISL_2896227, EPI_ISL_2896228, EPI_ISL_2896229, EPI_ISL_2896230, EPI_ISL_2896231                                                                                                                                                                                                                                                                                                                                                                                                                                                                                                                                                                                                                                                                                                                                                                                                                                                                                                                                                                                                                                                                                                                                                                                                                                                                                                                                                                                                                                                                                                                                                                                                                                                                                                                                                                                                                                                                                                                                                                                                                                                                                                                                                                                                                                                                                                                                                                                                                                                                                                                                                                                                                                                                                                                                                                                                                                                                                                                                                                                                                                                                                                                                                                                                                                                                                                                                                                                                                                                                                                                                                                                                                                                                                                                                                                                                                                                                                                                                                                                                                                                                                                                                                                                                                                                                                                                                                                                                                                                                                                                                                                                                                                 | see above                                                                                                                                                                               | Department of Acute Infectious Diseases Control and Prevention, Yunnan Provincial Center for Disease Control and Prevention                                                             | Department of Acute Infectious Diseases Control and Prevention, Yunnan Provincial Center for Disease Control and Prevention                                                                                                                                                                                                                                                                                                                                                                                                                                                                                                                                                                                                                                                                                                                                                                                                                                                                                                                                                                                                                                                                                                                                                                                                                                                                                                                                                                                                                                                                                                               |                                                                                                                                                                                                                                                                                                      |
| EPI_ISL_2430149, EPI_ISL_2430527, EPI_ISL_2665415, EPI_ISL_2665480, EPI_ISL_2665812, EPI_ISL_2666132, EPI_ISL_2666159, EPI_ISL_2666270, EPI_ISL_2666451, EPI_ISL_2666493, EPI_ISL_2666670, EPI_ISL_2666994, EPI_ISL_2667192, EPI_ISL_2667325, EPI_ISL_2667354, EPI_ISL_2667612, EPI_ISL_2667628, EPI_ISL_2667724, EPI_ISL_2667866, EPI_ISL_2668073, EPI_ISL_2668151, EPI_ISL_2668182, EPI_ISL_2668506, EPI_ISL_2668554, EPI_ISL_2668655, EPI_ISL_2668703, EPI_ISL_2668734, EPI_ISL_2668747, EPI_ISL_2668807, EPI_ISL_2668914, EPI_ISL_2668987, EPI_ISL_2669320, EPI_ISL_2669478, EPI_ISL_2669604, EPI_ISL_2670090, EPI_ISL_2670242, EPI_ISL_2670481, EPI_ISL_2670501, EPI_ISL_2670547, EPI_ISL_2670548, EPI_ISL_2670549, EPI_ISL_2670550, EPI_ISL_2670551, EPI_ISL_2670552, EPI_ISL_2670553, EPI_ISL_2670554, EPI_ISL_2670555, EPI_ISL_2670556, EPI_ISL_2670557, EPI_ISL_2670558, EPI_ISL_2670559, EPI_ISL_2670560, EPI_ISL_2670561, EPI_ISL_2670562, EPI_ISL_2670563, EPI_ISL_2670564, EPI_ISL_2670565, EPI_ISL_2670566, EPI_ISL_2670567, EPI_ISL_2670568, EPI_ISL_2670569, EPI_ISL_2670570, EPI_ISL_2670571, EPI_ISL_2670572, EPI_ISL_2670573, EPI_ISL_2670574, EPI_ISL_2670575, EPI_ISL_2670576, EPI_ISL_2670577, EPI_ISL_2670578, EPI_ISL_2670579, EPI_ISL_2670580, EPI_ISL_2670581, EPI_ISL_2670582, EPI_ISL_2670583, EPI_ISL_2670584, EPI_ISL_2670585, EPI_ISL_2670586, EPI_ISL_2670587, EPI_ISL_2670588, EPI_ISL_2670589, EPI_ISL_2670590, EPI_ISL_2670591, EPI_ISL_2670592, EPI_ISL_2670593, EPI_ISL_2670594, EPI_ISL_2670595, EPI_ISL_2670596, EPI_ISL_2670597, EPI_ISL_2670598, EPI_ISL_2670599, EPI_ISL_2670600, EPI_ISL_2670601, EPI_ISL_2670602, EPI_ISL_2670603, EPI_ISL_2670604, EPI_ISL_2670605, EPI_ISL_2670606, EPI_ISL_2670607, EPI_ISL_2670608, EPI_ISL_2670609, EPI_ISL_2670610, EPI_ISL_2670611, EPI_ISL_2670612, EPI_ISL_2670613, EPI_ISL_2670614, EPI_ISL_2670615, EPI_ISL_2670616, EPI_ISL_2670617, EPI_ISL_2670618, EPI_ISL_2670619, EPI_ISL_2670620, EPI_ISL_2670621, EPI_ISL_2670622, EPI_ISL_2670623, EPI_ISL_2670624, EPI_ISL_2670625, EPI_ISL_2670626, EPI_ISL_2670627, EPI_ISL_2670628, EPI_ISL_2670629, EPI_ISL_2670630, EPI_ISL_2670631, EPI_ISL_2670632, EPI_ISL_2670633, EPI_ISL_2670634, EPI_ISL_2670635, EPI_ISL_2670636, EPI_ISL_2670637, EPI_ISL_2670638, EPI_ISL_2670639, EPI_ISL_2670640, EPI_ISL_2670641, EPI_ISL_2670642, EPI_ISL_2670643, EPI_ISL_2670644, EPI_ISL_2670645, EPI_ISL_2670646, EPI_ISL_2670647, EPI_ISL_2670648, EPI_ISL_2670649, EPI_ISL_2670650, EPI_ISL_2670651, EPI_ISL_2670652, EPI_ISL_2670653, EPI_ISL_2670654, EPI_ISL_2670655, EPI_ISL_2670656, EPI_ISL_2670657, EPI_ISL_2670658, EPI_ISL_2670659, EPI_ISL_2670660, EPI_ISL_2670661, EPI_ISL_2670662, EPI_ISL_2670663, EPI_ISL_2670664, EPI_ISL_2670665, EPI_ISL_2670666, EPI_ISL_2670667, EPI_ISL_2670668, EPI_ISL_2670669, EPI_ISL_2670670, EPI_ISL_2670671, EPI_ISL_2670672, EPI_ISL_2670673, EPI_ISL_2670674, EPI_ISL_2670675, EPI_ISL_2670676, EPI_ISL_2670677, EPI_ISL_2670678, EPI_ISL_2670679, EPI_ISL_2670680, EPI_ISL_2670681, EPI_ISL_2670682, EPI_ISL_2670683, EPI_ISL_2670684, EPI_ISL_2670685, EPI_ISL_2670686, EPI_ISL_2670687, EPI_ISL_2670688, EPI_ISL_2670689, EPI_ISL_2670690, EPI_ISL_2670691, EPI_ISL_2670692, EPI_ISL_2670693, EPI_ISL_2670694, EPI_ISL_2670695, EPI_ISL_2670696, EPI_ISL_2670697, EPI_ISL_2670698, EPI_ISL_2670699, EPI_ISL_2670700, EPI_ISL_2670701, EPI_ISL_2670702, EPI_ISL_2670703, EPI_ISL_2670704, EPI_ISL_2670705, EPI_ISL_2670706, EPI_ISL_2670707, EPI_ISL_2670708, EPI_ISL_2670709, EPI_ISL_2670710, EPI_ISL_2670711, EPI_ISL_2670712, EPI_ISL_2670713, EPI_ISL_2670714, EPI_ISL_2670715, EPI_ISL_2670716, EPI_ISL_2670717, EPI_ISL_2670718, EPI_ISL_2670719, EPI_ISL_2670720, EPI_ISL_2670721, EPI_ISL_2670722, EPI_ISL_2670723, EPI_ISL_2670724, EPI_ISL_2670725, EPI_ISL_2670726, EPI_ISL_2670727, EPI_ISL_2670728, EPI_ISL_2670729, EPI_ISL_2670730, EPI_ISL_2670731, EPI_ISL_2670732, EPI_ISL_2670733, EPI_ISL_2670734, EPI_ISL_2670735, EPI_ISL_2670736, EPI_ISL_2670737, EPI_ISL_2670738, EPI_ISL_2670739, EPI_ISL_2670740, EPI_ISL_2670741, EPI_ISL_2670742, EPI_ISL_2670743, EPI_ISL_2670744, EPI_ISL_2670745, EPI_ISL_2670746, EPI_ISL_2670747, EPI_ISL_2670748, EPI_ISL_2670749, EPI_ISL_2670750, EPI_ISL_2670751, EPI_ISL_2670752, EPI_ISL_2670753, EPI_ISL_2670754, EPI_ISL_2670755, EPI_ISL_2670756, EPI_ISL_2670757, EPI_ISL_2670758, EPI_ISL_2670759, EPI_ISL_2670760, EPI_ISL_2670761, EPI_ISL_2670762, EPI_ISL_2670763, EPI_ISL_2670764, EPI_ISL_2670765, EPI_ISL_2670766, EPI_ISL_2670767, EPI_ISL_2670768, EPI_ISL_2670769, EPI_ISL_2670770, EPI_ISL_2670771, EPI_ISL_2670772, EPI_ISL_2670773, EPI_ISL_2670774, EPI_ISL_2670775, EPI_ISL_2670776, EPI_ISL_2670777, EPI_ISL_2670778, EPI_ISL_2670779, EPI_ISL_2670780, EPI_ISL_2670781, EPI_ISL_2670782, EPI_ISL_2670783, EPI_ISL_2670784, EPI_ISL_2670785, EPI_ISL_2670786, EPI_ISL_2670787, EPI_ISL_2670788, EPI_ISL_2670789, EPI_ISL_2670790, EPI_ISL_2670791, EPI_ISL_2670792, EPI_ISL_2670793, EPI_ISL_2670794, EPI_ISL_2670795, EPI_ISL_2670796, EPI_ISL_2670797, EPI_ISL_2670798, EPI_ISL_2670799, EPI_ISL_2670800, EPI_ISL_2670801, EPI_ISL_2670802, EPI_ISL_2670803, EPI_ISL_2670804, EPI_ISL_2670805, EPI_ISL_2670806, EPI_ISL_2670807, EPI_ISL_2670808, EPI_ISL_2670809, EPI_ISL_2670810, EPI_ISL_2670811, EPI_ISL_2670812, EPI_ISL_2 |                                                                                                                                                                                         |                                                                                                                                                                                         |                                                                                                                                                                                                                                                                                                                                                                                                                                                                                                                                                                                                                                                                                                                                                                                                                                                                                                                                                                                                                                                                                                                                                                                                                                                                                                                                                                                                                                                                                                                                                                                                                                           |                                                                                                                                                                                                                                                                                                      |

|                                                                                                                                                                                                                                                                                                                                                                                                                                                                                                                                                                                                                                                                                                                                                                                                                                                                                                                                                                                                                                                                                                                                                                                                                                                                                                                                                                                                                                                                                                                                                                                                                                                                                                                                                                                                                                                                                                                                                                                                                                                                                                                                                                                                                                                                                                                                                                      |                                                                                                                |                                                                                                                                                                                                                                |                                                                                                                                                                                                                                                                                                                                                                                                                              |
|----------------------------------------------------------------------------------------------------------------------------------------------------------------------------------------------------------------------------------------------------------------------------------------------------------------------------------------------------------------------------------------------------------------------------------------------------------------------------------------------------------------------------------------------------------------------------------------------------------------------------------------------------------------------------------------------------------------------------------------------------------------------------------------------------------------------------------------------------------------------------------------------------------------------------------------------------------------------------------------------------------------------------------------------------------------------------------------------------------------------------------------------------------------------------------------------------------------------------------------------------------------------------------------------------------------------------------------------------------------------------------------------------------------------------------------------------------------------------------------------------------------------------------------------------------------------------------------------------------------------------------------------------------------------------------------------------------------------------------------------------------------------------------------------------------------------------------------------------------------------------------------------------------------------------------------------------------------------------------------------------------------------------------------------------------------------------------------------------------------------------------------------------------------------------------------------------------------------------------------------------------------------------------------------------------------------------------------------------------------------|----------------------------------------------------------------------------------------------------------------|--------------------------------------------------------------------------------------------------------------------------------------------------------------------------------------------------------------------------------|------------------------------------------------------------------------------------------------------------------------------------------------------------------------------------------------------------------------------------------------------------------------------------------------------------------------------------------------------------------------------------------------------------------------------|
| EPI_ISL_2003343                                                                                                                                                                                                                                                                                                                                                                                                                                                                                                                                                                                                                                                                                                                                                                                                                                                                                                                                                                                                                                                                                                                                                                                                                                                                                                                                                                                                                                                                                                                                                                                                                                                                                                                                                                                                                                                                                                                                                                                                                                                                                                                                                                                                                                                                                                                                                      | Department of Clinical Microbiology                                                                            | GIGA Medical Genomics                                                                                                                                                                                                          | Bouchra Boujemla; Cécile Meex; Keith Durkin; Maria Artesi; Marie-Pierre Hayette; Nathalie Renotte; Pierrette Melin; Raphaël Boreux; Sébastien Bontems; Vincent Bours                                                                                                                                                                                                                                                         |
| EPI_ISL_1919364, EPI_ISL_2724975                                                                                                                                                                                                                                                                                                                                                                                                                                                                                                                                                                                                                                                                                                                                                                                                                                                                                                                                                                                                                                                                                                                                                                                                                                                                                                                                                                                                                                                                                                                                                                                                                                                                                                                                                                                                                                                                                                                                                                                                                                                                                                                                                                                                                                                                                                                                     | Department of Medical Microbiology - section Molde, Molde Hospital                                             | Norwegian Institute of Public Health, Department of Virology                                                                                                                                                                   | Atiya R Ali; Debech Nadia; Engebretsen Serina Beate; Garcia Llorente Ignacio; Hilde Elshaug; Hilde Vollan; Jon Bråte; Kamilla Heddeland Instefjord; Karoline Bragstad; Kathrine Stene-Johansen; Line Victoria Moen; Marie Paulsen Madsen; Olav Hungnes; Pedersen Benedikte Nevjen; Rasmus Riis Kopperud                                                                                                                      |
| EPI_ISL_2833646                                                                                                                                                                                                                                                                                                                                                                                                                                                                                                                                                                                                                                                                                                                                                                                                                                                                                                                                                                                                                                                                                                                                                                                                                                                                                                                                                                                                                                                                                                                                                                                                                                                                                                                                                                                                                                                                                                                                                                                                                                                                                                                                                                                                                                                                                                                                                      | Department of Microbiology, National Institute for Public Health of Kosovo                                     | Charité Universitätsmedizin Berlin, Institut für Virologie                                                                                                                                                                     | Aferdita Hyseni; Barbara Mühlemann; Blendi Jerliu; Christian Drosten; Donjeta Hajdari; Julia Schneider; Jörn Beheim-Schwarzbach; Nazmi Mehmeti; Pranvera Abazi; Talitha Veith; Terry Jones; Victor M Corman; Xhevat Jakupi; Zana Deva                                                                                                                                                                                        |
| EPI_ISL_2101020                                                                                                                                                                                                                                                                                                                                                                                                                                                                                                                                                                                                                                                                                                                                                                                                                                                                                                                                                                                                                                                                                                                                                                                                                                                                                                                                                                                                                                                                                                                                                                                                                                                                                                                                                                                                                                                                                                                                                                                                                                                                                                                                                                                                                                                                                                                                                      | Department of Microbiology, Tochigi Prefectural Institute of Public Health and Environmental Science           | Genome Analysis Center, Kamma Memorial Hospital                                                                                                                                                                                | Fuminori Mizukoshi; Hanako Yazawa; Hiroshi Kamma; Jun Ishii; Kaori Watanabe; Michiaki Masuda; Satoko Soma; Takuya Yazawa; Yoshiko Hitomi                                                                                                                                                                                                                                                                                     |
| EPI_ISL_2551520                                                                                                                                                                                                                                                                                                                                                                                                                                                                                                                                                                                                                                                                                                                                                                                                                                                                                                                                                                                                                                                                                                                                                                                                                                                                                                                                                                                                                                                                                                                                                                                                                                                                                                                                                                                                                                                                                                                                                                                                                                                                                                                                                                                                                                                                                                                                                      | Department of Microbiology, Tochigi Prefectural Institute of Public Health and Environmental Science           | Genome Analysis Center, Kamma Memorial Hospital                                                                                                                                                                                | Fuminori Mizukoshi; Hanako Yazawa; Hiroshi Kamma; Jun Ishii; Kaori Watanabe; Michiaki Masuda; Satoko Soma; Takuya Yazawa; Yoshiko Hitomi                                                                                                                                                                                                                                                                                     |
| EPI_ISL_2637224                                                                                                                                                                                                                                                                                                                                                                                                                                                                                                                                                                                                                                                                                                                                                                                                                                                                                                                                                                                                                                                                                                                                                                                                                                                                                                                                                                                                                                                                                                                                                                                                                                                                                                                                                                                                                                                                                                                                                                                                                                                                                                                                                                                                                                                                                                                                                      | Department of Microbiology, Yamanashi Institute for Public Health and Environment                              | Genome Analysis Center, Yamanashi Central Hospital                                                                                                                                                                             | Yosuke Hirotsu                                                                                                                                                                                                                                                                                                                                                                                                               |
| EPI_ISL_2722210                                                                                                                                                                                                                                                                                                                                                                                                                                                                                                                                                                                                                                                                                                                                                                                                                                                                                                                                                                                                                                                                                                                                                                                                                                                                                                                                                                                                                                                                                                                                                                                                                                                                                                                                                                                                                                                                                                                                                                                                                                                                                                                                                                                                                                                                                                                                                      | Department of Pathology, University of Cambridge                                                               | COVID-19 Genomics UK (COG-UK) Consortium                                                                                                                                                                                       | Aminu S. Jahun; Ian Goodfellow; Ilana Georgana; Martin D. Curran; Myra Hosmillo; Rhys Izuagbe; Surendra Parmar; William L. Hamilton; Yasmin Chaudhry                                                                                                                                                                                                                                                                         |
| EPI_ISL_2099869, EPI_ISL_2190101, EPI_ISL_2687994, EPI_ISL_2687997                                                                                                                                                                                                                                                                                                                                                                                                                                                                                                                                                                                                                                                                                                                                                                                                                                                                                                                                                                                                                                                                                                                                                                                                                                                                                                                                                                                                                                                                                                                                                                                                                                                                                                                                                                                                                                                                                                                                                                                                                                                                                                                                                                                                                                                                                                   | Department of Public Health Bucharest                                                                          | National Institute of Infectious Diseases-Prof. Dr. Matei Bals Molecular Diagnostics Laboratory                                                                                                                                | Andreea Tudor; Corina Casangiu; Dan Otelea; Leontina Banica; Marius Surleac; Ovidiu Vlaicu; Petre Milu; Robert Hohan; Simona Paraschiv                                                                                                                                                                                                                                                                                       |
| EPI_ISL_2434174, EPI_ISL_2434982, EPI_ISL_2438666, EPI_ISL_2757734, EPI_ISL_2757736, EPI_ISL_2757737, EPI_ISL_2757738, EPI_ISL_2757739, EPI_ISL_2757741, EPI_ISL_2757743, EPI_ISL_2757744, EPI_ISL_2757756                                                                                                                                                                                                                                                                                                                                                                                                                                                                                                                                                                                                                                                                                                                                                                                                                                                                                                                                                                                                                                                                                                                                                                                                                                                                                                                                                                                                                                                                                                                                                                                                                                                                                                                                                                                                                                                                                                                                                                                                                                                                                                                                                           |                                                                                                                |                                                                                                                                                                                                                                |                                                                                                                                                                                                                                                                                                                                                                                                                              |
| see above                                                                                                                                                                                                                                                                                                                                                                                                                                                                                                                                                                                                                                                                                                                                                                                                                                                                                                                                                                                                                                                                                                                                                                                                                                                                                                                                                                                                                                                                                                                                                                                                                                                                                                                                                                                                                                                                                                                                                                                                                                                                                                                                                                                                                                                                                                                                                            | Department of Virology                                                                                         | Department of Virology                                                                                                                                                                                                         | Aamer Ikram; Massab Umair; Muhammad Ammar; Muhammad Salman; Nazish Badar; Syed Adnan Haider; Zaira Rehman                                                                                                                                                                                                                                                                                                                    |
| EPI_ISL_2608773, EPI_ISL_2608787, EPI_ISL_2608788, EPI_ISL_2608789, EPI_ISL_2608815, EPI_ISL_2608823, EPI_ISL_2608834, EPI_ISL_2608879, EPI_ISL_2609354                                                                                                                                                                                                                                                                                                                                                                                                                                                                                                                                                                                                                                                                                                                                                                                                                                                                                                                                                                                                                                                                                                                                                                                                                                                                                                                                                                                                                                                                                                                                                                                                                                                                                                                                                                                                                                                                                                                                                                                                                                                                                                                                                                                                              |                                                                                                                |                                                                                                                                                                                                                                |                                                                                                                                                                                                                                                                                                                                                                                                                              |
| see above                                                                                                                                                                                                                                                                                                                                                                                                                                                                                                                                                                                                                                                                                                                                                                                                                                                                                                                                                                                                                                                                                                                                                                                                                                                                                                                                                                                                                                                                                                                                                                                                                                                                                                                                                                                                                                                                                                                                                                                                                                                                                                                                                                                                                                                                                                                                                            | Department of Virology and Immunology, University of Helsinki and Helsinki University Hospital, HUSLAB Finland | Department of Virology, Faculty of Medicine, University of Helsinki, Helsinki, Finland                                                                                                                                         | Essi Korhonen; Hanna Jarva; Hanna Liimatainen; Hannimari Kallio-Kokko; Harri Kangas; Hussein Alburkat; Jenni Virtanen; Maija Lappalainen; Maija Suvanto; Olli Vapalahti; Pekka Ellonen; Phuoc Truong; Ravi Kant; Sari Hannula; Satu Kurlake; Teemu Smura                                                                                                                                                                     |
| EPI_ISL_1868349, EPI_ISL_1869673, EPI_ISL_1871129, EPI_ISL_1872528, EPI_ISL_1885762, EPI_ISL_1890934, EPI_ISL_2024848, EPI_ISL_2024994, EPI_ISL_2026084, EPI_ISL_2026527, EPI_ISL_2026828, EPI_ISL_2027848, EPI_ISL_2127542, EPI_ISL_2172683, EPI_ISL_2175543, EPI_ISL_2176057, EPI_ISL_2178114, EPI_ISL_2296934, EPI_ISL_2299973, EPI_ISL_2300683, EPI_ISL_2300806, EPI_ISL_2300839                                                                                                                                                                                                                                                                                                                                                                                                                                                                                                                                                                                                                                                                                                                                                                                                                                                                                                                                                                                                                                                                                                                                                                                                                                                                                                                                                                                                                                                                                                                                                                                                                                                                                                                                                                                                                                                                                                                                                                                 | Department of Virus and Microbiological Special Diagnostics, Statens Serum Institut, Copenhagen, Denmark       | Aalborg University                                                                                                                                                                                                             | Danish Covid-19 Genome Consortium                                                                                                                                                                                                                                                                                                                                                                                            |
| see above                                                                                                                                                                                                                                                                                                                                                                                                                                                                                                                                                                                                                                                                                                                                                                                                                                                                                                                                                                                                                                                                                                                                                                                                                                                                                                                                                                                                                                                                                                                                                                                                                                                                                                                                                                                                                                                                                                                                                                                                                                                                                                                                                                                                                                                                                                                                                            |                                                                                                                |                                                                                                                                                                                                                                |                                                                                                                                                                                                                                                                                                                                                                                                                              |
| EPI_ISL_2820852                                                                                                                                                                                                                                                                                                                                                                                                                                                                                                                                                                                                                                                                                                                                                                                                                                                                                                                                                                                                                                                                                                                                                                                                                                                                                                                                                                                                                                                                                                                                                                                                                                                                                                                                                                                                                                                                                                                                                                                                                                                                                                                                                                                                                                                                                                                                                      | Dept. of Medical Microbiology, Stavanger University Hospital, Helse Stavanger HF                               | Norwegian Institute of Public Health, Department of Virology                                                                                                                                                                   | Atiya R Ali; Debech Nadia; Engebretsen Serina Beate; Garcia Llorente Ignacio; Hilde Elshaug; Hilde Vollan; Jon Bråte; Kamilla Heddeland Instefjord; Karoline Bragstad; Kathrine Stene-Johansen; Line Victoria Moen; Marie Paulsen Madsen; Olav Hungnes; Pedersen Benedikte Nevjen; Rasmus Riis Kopperud                                                                                                                      |
| EPI_ISL_1994923, EPI_ISL_2358012, EPI_ISL_2438787, EPI_ISL_2438788, EPI_ISL_2438789, EPI_ISL_2438790, EPI_ISL_2438791, EPI_ISL_2438792, EPI_ISL_2438800, EPI_ISL_2772594, EPI_ISL_2772610, EPI_ISL_2772613, EPI_ISL_2772622, EPI_ISL_2772628, EPI_ISL_2772635, EPI_ISL_2772642, EPI_ISL_2772645, EPI_ISL_2772649, EPI_ISL_2828342, EPI_ISL_2828347, EPI_ISL_2828356, EPI_ISL_2828357, EPI_ISL_2828358, EPI_ISL_2828359, EPI_ISL_2828360, EPI_ISL_2828361, EPI_ISL_2828362, EPI_ISL_2828363, EPI_ISL_2828364, EPI_ISL_2828365, EPI_ISL_2828370, EPI_ISL_2828373, EPI_ISL_2828376, EPI_ISL_2828379, EPI_ISL_2828380, EPI_ISL_2868424, EPI_ISL_2868431, EPI_ISL_2868433, EPI_ISL_2868435, EPI_ISL_2868439, EPI_ISL_2868440, EPI_ISL_2868443, EPI_ISL_2868444, EPI_ISL_2868446, EPI_ISL_2868447, EPI_ISL_2868448, EPI_ISL_2868451, EPI_ISL_2868454, EPI_ISL_2868457, EPI_ISL_2868458, EPI_ISL_2886054, EPI_ISL_2886055, EPI_ISL_2886057, EPI_ISL_2886058, EPI_ISL_2886061, EPI_ISL_2886062, EPI_ISL_2886063, EPI_ISL_2886064, EPI_ISL_2886065, EPI_ISL_2886066, EPI_ISL_2886067, EPI_ISL_2886068, EPI_ISL_2886069, EPI_ISL_2886070, EPI_ISL_2886071, EPI_ISL_2886073                                                                                                                                                                                                                                                                                                                                                                                                                                                                                                                                                                                                                                                                                                                                                                                                                                                                                                                                                                                                                                                                                                                                                                                                     |                                                                                                                |                                                                                                                                                                                                                                |                                                                                                                                                                                                                                                                                                                                                                                                                              |
| see above                                                                                                                                                                                                                                                                                                                                                                                                                                                                                                                                                                                                                                                                                                                                                                                                                                                                                                                                                                                                                                                                                                                                                                                                                                                                                                                                                                                                                                                                                                                                                                                                                                                                                                                                                                                                                                                                                                                                                                                                                                                                                                                                                                                                                                                                                                                                                            | Dept. of Microbiology and Infection Control, Akershus University Hospital HF                                   | Dept. of Microbiology and Infection Control, Akershus University Hospital HF                                                                                                                                                   | Alexander Hesselberg Løvestad; Hege Vangstein Aamot                                                                                                                                                                                                                                                                                                                                                                          |
| EPI_ISL_2171267                                                                                                                                                                                                                                                                                                                                                                                                                                                                                                                                                                                                                                                                                                                                                                                                                                                                                                                                                                                                                                                                                                                                                                                                                                                                                                                                                                                                                                                                                                                                                                                                                                                                                                                                                                                                                                                                                                                                                                                                                                                                                                                                                                                                                                                                                                                                                      | Dhulikhel Hospital, Kathmandu University Hospital                                                              | Molecular and Genomics Research Lab, Dhulikhel Hospital, Kathmandu University Hospital                                                                                                                                         | Dipesh Tamrakar; Meghnath Dhimal; Navin Adhikari; Nishan Katuwal; Pradip Gyanwali; Rajeev Shrestha; Saroj Bhattarai; Surendra Kumar Madhup                                                                                                                                                                                                                                                                                   |
| EPI_ISL_2314888, EPI_ISL_2636270                                                                                                                                                                                                                                                                                                                                                                                                                                                                                                                                                                                                                                                                                                                                                                                                                                                                                                                                                                                                                                                                                                                                                                                                                                                                                                                                                                                                                                                                                                                                                                                                                                                                                                                                                                                                                                                                                                                                                                                                                                                                                                                                                                                                                                                                                                                                     | Diagnosticum - Labor Neukirchen                                                                                | Robert Koch Institute                                                                                                                                                                                                          |                                                                                                                                                                                                                                                                                                                                                                                                                              |
| EPI_ISL_2503955, EPI_ISL_2503966                                                                                                                                                                                                                                                                                                                                                                                                                                                                                                                                                                                                                                                                                                                                                                                                                                                                                                                                                                                                                                                                                                                                                                                                                                                                                                                                                                                                                                                                                                                                                                                                                                                                                                                                                                                                                                                                                                                                                                                                                                                                                                                                                                                                                                                                                                                                     | Diagnostyka                                                                                                    | 1. Academic Center for Pathomorphological and Genetic-Molecular Diagnostics ltd, Białystok, Poland 2. National Institute of Public Health - National Institute of Hygiene, Warsaw, Poland                                      | Anetta Sulewska; Jacek Nikliński; Janusz Dzieciol; Joanna Kiśluk; Katarzyna Zacharczuk; Konrad Raczkowski; Magdalena Nowakowska; Małgorzata Sadkowska-Todys; Piotr Karabowicz; Piotr Majewski; Przemysław Biecek. Joanna Reszeć; Radosław Charkiewicz; Tomasz Wołkowicz                                                                                                                                                      |
| EPI_ISL_2455193                                                                                                                                                                                                                                                                                                                                                                                                                                                                                                                                                                                                                                                                                                                                                                                                                                                                                                                                                                                                                                                                                                                                                                                                                                                                                                                                                                                                                                                                                                                                                                                                                                                                                                                                                                                                                                                                                                                                                                                                                                                                                                                                                                                                                                                                                                                                                      | Diagnostyka                                                                                                    | 1. Tricity SARS-CoV-2 sequencing consortium: University of Gdansk, Medical University of Gdansk, Vaxican Ltd., Invicta Ltd. 2. National Institute of Public Health - National Institute of Hygiene, Warsaw, Poland             | Celina Cybulska; Karolina Gackowska; Katarzyna Groth; Katarzyna Zacharczuk; Krystyna Bienkowska Szewczyk; Lukasz Rabalski; Maciej Grzybek; Maciej Kosinski; Magdalena Nowakowska; Marcin Lubocki; Małgorzata Sadkowska-Todys; Tomasz Wołkowicz                                                                                                                                                                               |
| EPI_ISL_2503908, EPI_ISL_2503914                                                                                                                                                                                                                                                                                                                                                                                                                                                                                                                                                                                                                                                                                                                                                                                                                                                                                                                                                                                                                                                                                                                                                                                                                                                                                                                                                                                                                                                                                                                                                                                                                                                                                                                                                                                                                                                                                                                                                                                                                                                                                                                                                                                                                                                                                                                                     | Diagnostyka Sp. z o.o.                                                                                         | 1. Academic Center for Pathomorphological and Genetic-Molecular Diagnostics ltd, Białystok, Poland 2. National Institute of Public Health - National Institute of Hygiene, Warsaw, Poland                                      | Anetta Sulewska; Jacek Nikliński; Janusz Dzieciol; Joanna Kiśluk; Katarzyna Zacharczuk; Konrad Raczkowski; Magdalena Nowakowska; Małgorzata Sadkowska-Todys; Piotr Karabowicz; Piotr Majewski; Przemysław Biecek. Joanna Reszeć; Radosław Charkiewicz; Tomasz Wołkowicz                                                                                                                                                      |
| EPI_ISL_2365789                                                                                                                                                                                                                                                                                                                                                                                                                                                                                                                                                                                                                                                                                                                                                                                                                                                                                                                                                                                                                                                                                                                                                                                                                                                                                                                                                                                                                                                                                                                                                                                                                                                                                                                                                                                                                                                                                                                                                                                                                                                                                                                                                                                                                                                                                                                                                      | Diagnostyka Sp. z o.o.                                                                                         | 1. National Institute of Public Health - National Institute of Hygiene, Warsaw, Poland 2. Biobank Lab, University of Lodz 3. Laboratory of Respiratory Viruses, Teaching and Clinical Center of the Medical University of Lodz | Dominik Strapagiel; Izabela Drózdż; Jakub Lach; Katarzyna Zacharczuk; Klaudyna Królikowska; Maciej Borowiec; Magdalena Nowakowska; Magdalena Traczyk-Borszyńska; Marcin Słomka; Marta Sobalska-Kwapis; Małgorzata Sadkowska-Todys; Tomasz Płoszaj; Tomasz Wołkowicz                                                                                                                                                          |
| EPI_ISL_2495292                                                                                                                                                                                                                                                                                                                                                                                                                                                                                                                                                                                                                                                                                                                                                                                                                                                                                                                                                                                                                                                                                                                                                                                                                                                                                                                                                                                                                                                                                                                                                                                                                                                                                                                                                                                                                                                                                                                                                                                                                                                                                                                                                                                                                                                                                                                                                      | Diagnostyka Sp. z o.o.                                                                                         | 1. National Institute of Public Health - National Institute of Hygiene; 2. Eurofins Genomics Europe Sequencing GmbH                                                                                                            | ECDC COVID-19 WGS support team; Eurofins Genomics Europe Sequencing Team; Gierczyński Rafał; Sadkowska-Todys Małgorzata; Wołkowicz Tomasz; Zacharczuk Katarzyna                                                                                                                                                                                                                                                              |
| EPI_ISL_2140365, EPI_ISL_2140366, EPI_ISL_2140367                                                                                                                                                                                                                                                                                                                                                                                                                                                                                                                                                                                                                                                                                                                                                                                                                                                                                                                                                                                                                                                                                                                                                                                                                                                                                                                                                                                                                                                                                                                                                                                                                                                                                                                                                                                                                                                                                                                                                                                                                                                                                                                                                                                                                                                                                                                    | Diagnostyka Sp. z o.o.                                                                                         | 1. Tricity SARS-CoV-2 sequencing consortium: University of Gdansk, Medical University of Gdansk, Vaxican Ltd., Invicta Ltd. 2. National Institute of Public Health - National Institute of Hygiene, Warsaw, Poland             | Celina Cybulska; Karolina Gackowska; Katarzyna Groth; Katarzyna Zacharczuk; Krystyna Bienkowska Szewczyk; Lukasz Rabalski; Maciej Grzybek; Maciej Kosinski; Magdalena Nowakowska; Małgorzata Sadkowska-Todys; Tomasz Wołkowicz                                                                                                                                                                                               |
| EPI_ISL_2423033                                                                                                                                                                                                                                                                                                                                                                                                                                                                                                                                                                                                                                                                                                                                                                                                                                                                                                                                                                                                                                                                                                                                                                                                                                                                                                                                                                                                                                                                                                                                                                                                                                                                                                                                                                                                                                                                                                                                                                                                                                                                                                                                                                                                                                                                                                                                                      | Diagnostyka. Laboratoria Medyczne.                                                                             | 1. ViroGenetics - BSL3 Laboratory of Virology, Małopolska Centre of Biotechnology, Jagiellonian University; 2. Diagnoston Laboratoria Lukasz Rabalski                                                                          | Foremny J.; Gromowski, T.; Kowalski, M.; Labaj; Maciej Kosinski; Mazur-Panasiuk, N.; Natalia Derewonko; P.P.; Pyrc, K.; Rabalski L.; Rogalska-Kupiec M.; Swadzba J.; Sylwia Januszczak; Szulc, P.; Wydmanski, W.; Zielinska M                                                                                                                                                                                                |
| EPI_ISL_2821066                                                                                                                                                                                                                                                                                                                                                                                                                                                                                                                                                                                                                                                                                                                                                                                                                                                                                                                                                                                                                                                                                                                                                                                                                                                                                                                                                                                                                                                                                                                                                                                                                                                                                                                                                                                                                                                                                                                                                                                                                                                                                                                                                                                                                                                                                                                                                      | Diagnostyka. Laboratoria Medyczne.                                                                             | 1. ViroGenetics - BSL3 Laboratory of Virology, Małopolska Centre of Biotechnology, Jagiellonian University; 2. Diagnoston Laboratoria Lukasz Rabalski                                                                          | Gromowski, T.; Kowalski, M.; Labaj; Maciej Kosinski; Mazur-Panasiuk, N.; Natalia Derewonko; P.P.; Pyrc, K.; Rabalski L.; Rogalska-Kupiec M.; Swadzba J.; Sylwia Januszczak; Szulc, P.; Wydmanski, W.                                                                                                                                                                                                                         |
| EPI_ISL_2319009, EPI_ISL_2423090, EPI_ISL_2423128, EPI_ISL_2423135, EPI_ISL_2423139                                                                                                                                                                                                                                                                                                                                                                                                                                                                                                                                                                                                                                                                                                                                                                                                                                                                                                                                                                                                                                                                                                                                                                                                                                                                                                                                                                                                                                                                                                                                                                                                                                                                                                                                                                                                                                                                                                                                                                                                                                                                                                                                                                                                                                                                                  | Diagnostyka. Laboratoria Medyczne.                                                                             | 1. ViroGenetics - BSL3 Laboratory of Virology, Małopolska Centre of Biotechnology, Jagiellonian University; 2. genXone SA, Research & Development Laboratory                                                                   | Brylak A; Drwesa-Matelska N; Gidlewicz A; Grabowski J; Gromowski, T.; Januszczak S; Kaszuba M; Kowalski, M.; Krych L; Labaj; Mazur-Panasiuk, N.; Nowicki G; P.P.; Pyrc, K.; Sykulski M; Szeszko K; Szulc, P.; Wydmanski W.                                                                                                                                                                                                   |
| EPI_ISL_2694759, EPI_ISL_2694775                                                                                                                                                                                                                                                                                                                                                                                                                                                                                                                                                                                                                                                                                                                                                                                                                                                                                                                                                                                                                                                                                                                                                                                                                                                                                                                                                                                                                                                                                                                                                                                                                                                                                                                                                                                                                                                                                                                                                                                                                                                                                                                                                                                                                                                                                                                                     | Diagnostyka. Laboratoria Medyczne.                                                                             | 1. ViroGenetics - BSL3 Laboratory of Virology, Małopolska Centre of Biotechnology, Jagiellonian University; 2. Diagnoston Laboratoria Lukasz Rabalski                                                                          | Gromowski, T.; Kowalski, M.; Labaj; Maciej Kosinski; Mazur-Panasiuk, N.; Natalia Derewonko; P.P.; Pyrc, K.; Rabalski L.; Rogalska-Kupiec M.; Swadzba J.; Sylwia Januszczak; Szulc, P.; Wydmanski, W.                                                                                                                                                                                                                         |
| EPI_ISL_2597956, EPI_ISL_2597959, EPI_ISL_2599793, EPI_ISL_2599798, EPI_ISL_2812972, EPI_ISL_2820237, EPI_ISL_2820240                                                                                                                                                                                                                                                                                                                                                                                                                                                                                                                                                                                                                                                                                                                                                                                                                                                                                                                                                                                                                                                                                                                                                                                                                                                                                                                                                                                                                                                                                                                                                                                                                                                                                                                                                                                                                                                                                                                                                                                                                                                                                                                                                                                                                                                |                                                                                                                |                                                                                                                                                                                                                                |                                                                                                                                                                                                                                                                                                                                                                                                                              |
| see above                                                                                                                                                                                                                                                                                                                                                                                                                                                                                                                                                                                                                                                                                                                                                                                                                                                                                                                                                                                                                                                                                                                                                                                                                                                                                                                                                                                                                                                                                                                                                                                                                                                                                                                                                                                                                                                                                                                                                                                                                                                                                                                                                                                                                                                                                                                                                            | Dianalabs SA                                                                                                   | Genesupport                                                                                                                                                                                                                    | Geraldine Jost; Katia Jaton; Nadia Liassine; Tanguy ARAUD                                                                                                                                                                                                                                                                                                                                                                    |
| EPI_ISL_2115134, EPI_ISL_2115136, EPI_ISL_2115145                                                                                                                                                                                                                                                                                                                                                                                                                                                                                                                                                                                                                                                                                                                                                                                                                                                                                                                                                                                                                                                                                                                                                                                                                                                                                                                                                                                                                                                                                                                                                                                                                                                                                                                                                                                                                                                                                                                                                                                                                                                                                                                                                                                                                                                                                                                    | Dianovis GmbH Greiz                                                                                            | Robert Koch Institute                                                                                                                                                                                                          |                                                                                                                                                                                                                                                                                                                                                                                                                              |
| EPI_ISL_2379462, EPI_ISL_2379496, EPI_ISL_2379497, EPI_ISL_2379498, EPI_ISL_2379520, EPI_ISL_2379564, EPI_ISL_2379645, EPI_ISL_2379646, EPI_ISL_2379648                                                                                                                                                                                                                                                                                                                                                                                                                                                                                                                                                                                                                                                                                                                                                                                                                                                                                                                                                                                                                                                                                                                                                                                                                                                                                                                                                                                                                                                                                                                                                                                                                                                                                                                                                                                                                                                                                                                                                                                                                                                                                                                                                                                                              |                                                                                                                |                                                                                                                                                                                                                                |                                                                                                                                                                                                                                                                                                                                                                                                                              |
| see above                                                                                                                                                                                                                                                                                                                                                                                                                                                                                                                                                                                                                                                                                                                                                                                                                                                                                                                                                                                                                                                                                                                                                                                                                                                                                                                                                                                                                                                                                                                                                                                                                                                                                                                                                                                                                                                                                                                                                                                                                                                                                                                                                                                                                                                                                                                                                            | Dr S Raju, Director of Public Health and Preventive Medicine                                                   | inStem NCBS - INSACOG                                                                                                                                                                                                          | Uma Ramakrishnan Dasaradhi Palakodeti Aswin SaiNarain                                                                                                                                                                                                                                                                                                                                                                        |
| EPI_ISL_2886172, EPI_ISL_2886173                                                                                                                                                                                                                                                                                                                                                                                                                                                                                                                                                                                                                                                                                                                                                                                                                                                                                                                                                                                                                                                                                                                                                                                                                                                                                                                                                                                                                                                                                                                                                                                                                                                                                                                                                                                                                                                                                                                                                                                                                                                                                                                                                                                                                                                                                                                                     | Dr. Gernot Walder GmbH                                                                                         | Dr. Gernot Walder GmbH                                                                                                                                                                                                         | Sissy T. Sonneitner                                                                                                                                                                                                                                                                                                                                                                                                          |
| EPI_ISL_2145682, EPI_ISL_2145703, EPI_ISL_2145782, EPI_ISL_2449950, EPI_ISL_2449966, EPI_ISL_2449987, EPI_ISL_2449989, EPI_ISL_2449990, EPI_ISL_2483493, EPI_ISL_2860463, EPI_ISL_2860467, EPI_ISL_2860528, EPI_ISL_2860529, EPI_ISL_2860564                                                                                                                                                                                                                                                                                                                                                                                                                                                                                                                                                                                                                                                                                                                                                                                                                                                                                                                                                                                                                                                                                                                                                                                                                                                                                                                                                                                                                                                                                                                                                                                                                                                                                                                                                                                                                                                                                                                                                                                                                                                                                                                         |                                                                                                                |                                                                                                                                                                                                                                |                                                                                                                                                                                                                                                                                                                                                                                                                              |
| see above                                                                                                                                                                                                                                                                                                                                                                                                                                                                                                                                                                                                                                                                                                                                                                                                                                                                                                                                                                                                                                                                                                                                                                                                                                                                                                                                                                                                                                                                                                                                                                                                                                                                                                                                                                                                                                                                                                                                                                                                                                                                                                                                                                                                                                                                                                                                                            | Dutch COVID-19 response team                                                                                   | Erasmus Medical Center                                                                                                                                                                                                         | Anne van der Linden; Annemiek van der Eijk; Bas Oude Munnink; Corine GeurtsvanKessel; David Nieuwenhuijse; Emmanuelle Munger; Irina Chestakova; Marion Koopmans; Marjan Boter; Reina Sikkema; Richard Molenkamp; on behalf of the Dutch national COVID-19 respo                                                                                                                                                              |
| EPI_ISL_1792906, EPI_ISL_1792907, EPI_ISL_1792922, EPI_ISL_1962940, EPI_ISL_1962944, EPI_ISL_1962964, EPI_ISL_1962965, EPI_ISL_1962966, EPI_ISL_2094352, EPI_ISL_2094353, EPI_ISL_2094354, EPI_ISL_2094386, EPI_ISL_2094387, EPI_ISL_2094388, EPI_ISL_2094389, EPI_ISL_2094390, EPI_ISL_2094391, EPI_ISL_2094392, EPI_ISL_2094393, EPI_ISL_2094394, EPI_ISL_2220505, EPI_ISL_2220507, EPI_ISL_2220513, EPI_ISL_2220515, EPI_ISL_2220518, EPI_ISL_2220520, EPI_ISL_2303934, EPI_ISL_2303935, EPI_ISL_2303973, EPI_ISL_2303974, EPI_ISL_2303975, EPI_ISL_2303976, EPI_ISL_2303977, EPI_ISL_2303980, EPI_ISL_2303981, EPI_ISL_2303982, EPI_ISL_2303983, EPI_ISL_2303984, EPI_ISL_2405621, EPI_ISL_2405646, EPI_ISL_2405815, EPI_ISL_2405912, EPI_ISL_2476259, EPI_ISL_2476260, EPI_ISL_2476261, EPI_ISL_2476262, EPI_ISL_2476263, EPI_ISL_2476311, EPI_ISL_2476312, EPI_ISL_2476313, EPI_ISL_2476314, EPI_ISL_2476316, EPI_ISL_2476317, EPI_ISL_2476321, EPI_ISL_2476322, EPI_ISL_2476325, EPI_ISL_2476327, EPI_ISL_2476329, EPI_ISL_2476331, EPI_ISL_2476332, EPI_ISL_2609791, EPI_ISL_2609827, EPI_ISL_2610086, EPI_ISL_2610198, EPI_ISL_2610257, EPI_ISL_2610314, EPI_ISL_2610329, EPI_ISL_2610342, EPI_ISL_2610435, EPI_ISL_2610461, EPI_ISL_2610494, EPI_ISL_2610564, EPI_ISL_2610596, EPI_ISL_2610865, EPI_ISL_2610895, EPI_ISL_2610914, EPI_ISL_2672306, EPI_ISL_2672558, EPI_ISL_2672582, EPI_ISL_2672616, EPI_ISL_2672683, EPI_ISL_2672798, EPI_ISL_2672845, EPI_ISL_2673107, EPI_ISL_2673108, EPI_ISL_2673115, EPI_ISL_2673124, EPI_ISL_2673143, EPI_ISL_2673162, EPI_ISL_2673183, EPI_ISL_2673193, EPI_ISL_2673202, EPI_ISL_2673341, EPI_ISL_2673369, EPI_ISL_2673395, EPI_ISL_2788157, EPI_ISL_2788159, EPI_ISL_2788166, EPI_ISL_2788168, EPI_ISL_2788170, EPI_ISL_2788176, EPI_ISL_2788180, EPI_ISL_2788214, EPI_ISL_2788241, EPI_ISL_2788242, EPI_ISL_2788253, EPI_ISL_2788267, EPI_ISL_2788291, EPI_ISL_2788295, EPI_ISL_2788296, EPI_ISL_2788306, EPI_ISL_2788315, EPI_ISL_2788340, EPI_ISL_2862893, EPI_ISL_2862903, EPI_ISL_2862905, EPI_ISL_2862916, EPI_ISL_2862920, EPI_ISL_2862935, EPI_ISL_2862937, EPI_ISL_2862941, EPI_ISL_2862961, EPI_ISL_2862968, EPI_ISL_2862985, EPI_ISL_2862987, EPI_ISL_2863007, EPI_ISL_2863012, EPI_ISL_2863122, EPI_ISL_2863244, EPI_ISL_2863264, EPI_ISL_2863344, EPI_ISL_2863369, EPI_ISL_2863371, EPI_ISL_2863385 |                                                                                                                |                                                                                                                                                                                                                                |                                                                                                                                                                                                                                                                                                                                                                                                                              |
| see above                                                                                                                                                                                                                                                                                                                                                                                                                                                                                                                                                                                                                                                                                                                                                                                                                                                                                                                                                                                                                                                                                                                                                                                                                                                                                                                                                                                                                                                                                                                                                                                                                                                                                                                                                                                                                                                                                                                                                                                                                                                                                                                                                                                                                                                                                                                                                            | Dutch COVID-19 response team                                                                                   | National Institute for Public Health and the Environment (RIVM)                                                                                                                                                                | Adam Meijer; AnneMarie van den Brandt; Annelies Kroneman; Bas van der Veer; Chantal Reusken; Dennis Schmits; Dirk Eggink; Eunice Then; Florian Zwagemaker; Harry Vennema; James Groot; Jeroen Cremer; Karim Hajji; Kim Freriks; Linda van de Nes; Lisa Wijsman; Lynn Aarts; Melissa van Tuil; Robert Kohl; Rianne Jaarsma; Sanne Bos; Sharon van den Brink; Sjoerd Kulling; on behalf of the national COVID-19 response team |
| EPI_ISL_2322968                                                                                                                                                                                                                                                                                                                                                                                                                                                                                                                                                                                                                                                                                                                                                                                                                                                                                                                                                                                                                                                                                                                                                                                                                                                                                                                                                                                                                                                                                                                                                                                                                                                                                                                                                                                                                                                                                                                                                                                                                                                                                                                                                                                                                                                                                                                                                      | EHC MORGES                                                                                                     | Laboratory of genomics and metagenomics                                                                                                                                                                                        | Claire Bertelli; Damien Jacot; Gilbert Greub; Sébastien Aeby; Trestan Pillonel                                                                                                                                                                                                                                                                                                                                               |

|                                                                                                                                                                                                                                                                                                                                                                                                                                                                                                                                                                                                                                                                                                                                                                                                                                                                                                                                                                                                                                                                                                               |                                                                                                                                     |                                                                                                                                                                                                                                |                                                                                                                                                                                                                                                                                                                                                                  |
|---------------------------------------------------------------------------------------------------------------------------------------------------------------------------------------------------------------------------------------------------------------------------------------------------------------------------------------------------------------------------------------------------------------------------------------------------------------------------------------------------------------------------------------------------------------------------------------------------------------------------------------------------------------------------------------------------------------------------------------------------------------------------------------------------------------------------------------------------------------------------------------------------------------------------------------------------------------------------------------------------------------------------------------------------------------------------------------------------------------|-------------------------------------------------------------------------------------------------------------------------------------|--------------------------------------------------------------------------------------------------------------------------------------------------------------------------------------------------------------------------------|------------------------------------------------------------------------------------------------------------------------------------------------------------------------------------------------------------------------------------------------------------------------------------------------------------------------------------------------------------------|
| EPI_ISL_2614730                                                                                                                                                                                                                                                                                                                                                                                                                                                                                                                                                                                                                                                                                                                                                                                                                                                                                                                                                                                                                                                                                               | EKA Hospital BSD                                                                                                                    | Eijkman Institute for Molecular Biology, National Research and Innovation Agency                                                                                                                                               | Amin Soebandrio; Edison Johar; Friilasita A Yudhaputri; Hidayat Trimarsanto; Iskandar Adnan; Khin Saw Myint; Lidwina Priiliani; Lydia V. Panggalo; Muhammad Rezki Rasyak; Safarina G Malik; Sukma Oktavianthi; Willy Agustine                                                                                                                                    |
| EPI_ISL_2477869, EPI_ISL_2478515, EPI_ISL_2479023, EPI_ISL_2479127, EPI_ISL_2479472, EPI_ISL_2479857, EPI_ISL_2479874                                                                                                                                                                                                                                                                                                                                                                                                                                                                                                                                                                                                                                                                                                                                                                                                                                                                                                                                                                                         | see above                                                                                                                           | Edmonton Provincial Lab                                                                                                                                                                                                        | Public Health Agency of Canada (PHAC) National Microbiology Laboratory                                                                                                                                                                                                                                                                                           |
| EPI_ISL_2657533                                                                                                                                                                                                                                                                                                                                                                                                                                                                                                                                                                                                                                                                                                                                                                                                                                                                                                                                                                                                                                                                                               | Elling group, Institute of Molecular Biotechnology (IMBA)                                                                           | Berghthaler laboratory, CeMM Research Center for Molecular Medicine of the Austrian Academy of Sciences                                                                                                                        | Andreas Berghthaler; Anna Schedl; Bekir Erguner; Benedikt Agerer; Christoph Bock; Fabian Amman; Jan Laine; Lukas Endler; Maelle Le Moing; Martin Senekowitsch; Matthew Thornton; Michael Schuster; Petr Triska; Thomas Penz                                                                                                                                      |
| EPI_ISL_1845854, EPI_ISL_1846077, EPI_ISL_1846153, EPI_ISL_2110448, EPI_ISL_2110453, EPI_ISL_2110454, EPI_ISL_2110460, EPI_ISL_2110488, EPI_ISL_2110489, EPI_ISL_2110499, EPI_ISL_2110737, EPI_ISL_2123736, EPI_ISL_2123791, EPI_ISL_2123794, EPI_ISL_2123795, EPI_ISL_2123806, EPI_ISL_2259546, EPI_ISL_2314355, EPI_ISL_2316836, EPI_ISL_2316849, EPI_ISL_2316937, EPI_ISL_2317006, EPI_ISL_2471660, EPI_ISL_2471662, EPI_ISL_2471688, EPI_ISL_2471689, EPI_ISL_2472053, EPI_ISL_2634648, EPI_ISL_2634680                                                                                                                                                                                                                                                                                                                                                                                                                                                                                                                                                                                                   | see above                                                                                                                           | Eurofins LifeCodexx GmbH                                                                                                                                                                                                       | Robert Koch Institute                                                                                                                                                                                                                                                                                                                                            |
| EPI_ISL_2646231                                                                                                                                                                                                                                                                                                                                                                                                                                                                                                                                                                                                                                                                                                                                                                                                                                                                                                                                                                                                                                                                                               | Exalab                                                                                                                              | Cerba lab                                                                                                                                                                                                                      | Aude Lessenne; Bénédicte Roquebert; Emmanuel Lecorche; Kader Merah; Laura Verdurme; Patrice Herisson; Sabine Trombert-Paolantoni; Stéphanie Haim-Boukobza; Thierry Collin                                                                                                                                                                                        |
| EPI_ISL_2840294, EPI_ISL_2840296, EPI_ISL_2840298, EPI_ISL_2840299                                                                                                                                                                                                                                                                                                                                                                                                                                                                                                                                                                                                                                                                                                                                                                                                                                                                                                                                                                                                                                            | FL Bur. of Public Health Laboratories-Jacksonville                                                                                  | Centers for Disease Control and Prevention Division of Viral Diseases, Pathogen Discovery                                                                                                                                      | Alison Laufer Halpin; Ben L. Rambo-Martin; Clinton R. Paden; Dakota Howard; Darlene Wagner; Dave Wentworth; Dhwani Batra; Jasmine Padilla; Justin Lee; Katie Dillon; Krista Queen; Kristen Knipe; Kristine Lacek; Mark Burroughs; Matthew Schmerer; Mili Sheth; Peter Cook; Sam Shepard; Sarah Nobles; Shoshona Le; Suxiang Tong; Vivien Dugan; Yvette Unoarumhi |
| EPI_ISL_2840428                                                                                                                                                                                                                                                                                                                                                                                                                                                                                                                                                                                                                                                                                                                                                                                                                                                                                                                                                                                                                                                                                               | FL Bureau of Public Health Laboratories-Miami                                                                                       | Centers for Disease Control and Prevention Division of Viral Diseases, Pathogen Discovery                                                                                                                                      | Alison Laufer Halpin; Ben L. Rambo-Martin; Clinton R. Paden; Dakota Howard; Darlene Wagner; Dave Wentworth; Dhwani Batra; Jasmine Padilla; Justin Lee; Katie Dillon; Krista Queen; Kristen Knipe; Kristine Lacek; Mark Burroughs; Matthew Schmerer; Mili Sheth; Peter Cook; Sam Shepard; Sarah Nobles; Shoshona Le; Suxiang Tong; Vivien Dugan; Yvette Unoarumhi |
| EPI_ISL_2840281                                                                                                                                                                                                                                                                                                                                                                                                                                                                                                                                                                                                                                                                                                                                                                                                                                                                                                                                                                                                                                                                                               | FL Bureau of Public Health Laboratories-Tampa                                                                                       | Centers for Disease Control and Prevention Division of Viral Diseases, Pathogen Discovery                                                                                                                                      | Alison Laufer Halpin; Ben L. Rambo-Martin; Clinton R. Paden; Dakota Howard; Darlene Wagner; Dave Wentworth; Dhwani Batra; Jasmine Padilla; Justin Lee; Katie Dillon; Krista Queen; Kristen Knipe; Kristine Lacek; Mark Burroughs; Matthew Schmerer; Mili Sheth; Peter Cook; Sam Shepard; Sarah Nobles; Shoshona Le; Suxiang Tong; Vivien Dugan; Yvette Unoarumhi |
| EPI_ISL_2341936                                                                                                                                                                                                                                                                                                                                                                                                                                                                                                                                                                                                                                                                                                                                                                                                                                                                                                                                                                                                                                                                                               | FM Medical College, Balasore                                                                                                        | Institute of Life Sciences - INSACOG                                                                                                                                                                                           | Ajay Parida; Amol M. Kanampalliwar; Arup Ghosh; Atimukta Jha; INSACOG Consortium; Omprakash Shiriwas; Punit Prasad; Rajeeb Swain; Rupesh Dash; Safal Walia; Sana Fatma; Shifu Aggarwal; Sunil K. Raghav                                                                                                                                                          |
| EPI_ISL_2695316, EPI_ISL_2695317                                                                                                                                                                                                                                                                                                                                                                                                                                                                                                                                                                                                                                                                                                                                                                                                                                                                                                                                                                                                                                                                              | FMUP                                                                                                                                | Instituto Nacional de Saude (INSA)                                                                                                                                                                                             | Borges et al                                                                                                                                                                                                                                                                                                                                                     |
| EPI_ISL_2288947, EPI_ISL_2288948, EPI_ISL_2288973                                                                                                                                                                                                                                                                                                                                                                                                                                                                                                                                                                                                                                                                                                                                                                                                                                                                                                                                                                                                                                                             | FUNDACIO ALTHAIA-MANRESA                                                                                                            | Banc de Sang i Teixits                                                                                                                                                                                                         | Carlos Hobeich; Francisco Vidal; Irene Corrales; Lorena Ramirez; Maria Glòria Soria; Natàlia Comes; Nina Borràs; Noemí Gonzalez; Silvia Sauleda                                                                                                                                                                                                                  |
| EPI_ISL_2038893                                                                                                                                                                                                                                                                                                                                                                                                                                                                                                                                                                                                                                                                                                                                                                                                                                                                                                                                                                                                                                                                                               | Federal Budget Health Care Institution "Center of Hygiene and Epidemiology in Tver region"                                          | Group of Genomics and Postgenomic Technologies of Central Research Institute of Epidemiology                                                                                                                                   | Akimkin VG; Kaptelova VV; Kondrasheva LY; Korneenko VV; Melushenkova TG; Nadtoka MI; Saenko SS; Samollov AE; Smirnova YS; Speranskaya AS; Tivanova EV                                                                                                                                                                                                            |
| EPI_ISL_2466607                                                                                                                                                                                                                                                                                                                                                                                                                                                                                                                                                                                                                                                                                                                                                                                                                                                                                                                                                                                                                                                                                               | Felix-Platter Spital                                                                                                                | Clinical Bacteriology                                                                                                                                                                                                          | Adrian Egli; Alfredo Mari; Fanny Wegner; Hans Hirsch; Helena MB Seth-Smith; Julia Bielicki; Karoline Leuzinger; Manuel Battegay; Tim Rolloff                                                                                                                                                                                                                     |
| EPI_ISL_2466841, EPI_ISL_2467518, EPI_ISL_2467519, EPI_ISL_2467871, EPI_ISL_2467935, EPI_ISL_2467936                                                                                                                                                                                                                                                                                                                                                                                                                                                                                                                                                                                                                                                                                                                                                                                                                                                                                                                                                                                                          | Fimlab Laboratories                                                                                                                 | Fimlab Laboratories                                                                                                                                                                                                            | Bruno Luukinen; Leena Huhti; Mauri Keinänen; Minna Paloniemi; Sara Lehtinen; Tapio Seiskari                                                                                                                                                                                                                                                                      |
| EPI_ISL_2363870, EPI_ISL_2363874, EPI_ISL_2557176, EPI_ISL_2557177, EPI_ISL_2557179, EPI_ISL_2557180, EPI_ISL_2557181, EPI_ISL_2557182, EPI_ISL_2557183, EPI_ISL_2557184, EPI_ISL_2557185, EPI_ISL_2557186, EPI_ISL_2557187, EPI_ISL_2557193, EPI_ISL_2557194, EPI_ISL_2557195, EPI_ISL_2557196, EPI_ISL_2557197, EPI_ISL_2557198, EPI_ISL_2557199, EPI_ISL_2557200, EPI_ISL_2557201, EPI_ISL_2557202, EPI_ISL_2557203, EPI_ISL_2557204, EPI_ISL_2557205, EPI_ISL_2557206, EPI_ISL_2557207, EPI_ISL_2557208, EPI_ISL_2557209, EPI_ISL_2557210, EPI_ISL_2644866, EPI_ISL_2644898, EPI_ISL_2644901, EPI_ISL_2645068, EPI_ISL_2645071, EPI_ISL_2645084, EPI_ISL_2645086, EPI_ISL_2645108, EPI_ISL_2645111, EPI_ISL_2645112, EPI_ISL_2645113, EPI_ISL_2645117, EPI_ISL_2645205, EPI_ISL_2645212, EPI_ISL_2645216, EPI_ISL_2645217, EPI_ISL_2645218                                                                                                                                                                                                                                                                | see above                                                                                                                           | Fimlab Laboratoriot Oy Tampere                                                                                                                                                                                                 | Expert Microbiology, National Institute for Health and Welfare                                                                                                                                                                                                                                                                                                   |
| EPI_ISL_2558057                                                                                                                                                                                                                                                                                                                                                                                                                                                                                                                                                                                                                                                                                                                                                                                                                                                                                                                                                                                                                                                                                               | First Aide Diagnostic Center                                                                                                        | Philippine Genome Center                                                                                                                                                                                                       | Carita Savolainen-Kopra; Erika Lindh; Haider al-Hello; Jani Halkilahti; Kirsi Liitsola; Niina Ikonen; Olli Vapalahti; Pekka Ellonen; Phuoc Truong; Päivi Laurila; Ravi Kant; Sari Hannula; Soile Blomqvist; Teemu Smura                                                                                                                                          |
| EPI_ISL_2230013, EPI_ISL_2246887, EPI_ISL_2246888, EPI_ISL_2246889, EPI_ISL_2836030, EPI_ISL_2836077, EPI_ISL_2836102, EPI_ISL_2836176, EPI_ISL_2836254, EPI_ISL_2836281, EPI_ISL_2836425, EPI_ISL_2836519, EPI_ISL_2836527, EPI_ISL_2836585, EPI_ISL_2836586, EPI_ISL_2836637, EPI_ISL_2836639, EPI_ISL_2836640, EPI_ISL_2836642, EPI_ISL_2836644, EPI_ISL_2836648, EPI_ISL_2836719, EPI_ISL_2836726, EPI_ISL_2836730, EPI_ISL_2836731, EPI_ISL_2836737, EPI_ISL_2836775, EPI_ISL_2836781, EPI_ISL_2836787, EPI_ISL_2836789, EPI_ISL_2836804, EPI_ISL_2836836, EPI_ISL_2836837, EPI_ISL_2836842, EPI_ISL_2836843                                                                                                                                                                                                                                                                                                                                                                                                                                                                                             | see above                                                                                                                           | Florida Bureau of Public Health Laboratories                                                                                                                                                                                   | Jason Blanton; Sarah Schmedes                                                                                                                                                                                                                                                                                                                                    |
| EPI_ISL_2889854                                                                                                                                                                                                                                                                                                                                                                                                                                                                                                                                                                                                                                                                                                                                                                                                                                                                                                                                                                                                                                                                                               | Fondation Congolaise pour la recherche medicale (FCRM)                                                                              | Fondation Congolaise pour la Recherche Médicale                                                                                                                                                                                | Abel Lissom; Batchi-Bouyou Armel Landry; Francine Ntouni; Jean Claude Djontu; Mfoutou Mapanguy Claujens Chastel; Thirumalaisamy P. Velavan                                                                                                                                                                                                                       |
| EPI_ISL_2620951, EPI_ISL_2663244, EPI_ISL_2728608, EPI_ISL_2728614, EPI_ISL_2728618, EPI_ISL_2863954                                                                                                                                                                                                                                                                                                                                                                                                                                                                                                                                                                                                                                                                                                                                                                                                                                                                                                                                                                                                          | Fondazione IRCCS Ca' Granda Ospedale Maggiore Policlinico                                                                           | Fondazione IRCCS Ca' Granda Ospedale Maggiore Policlinico                                                                                                                                                                      | Ferruccio Ceriotti; Sara Uceda Renteria                                                                                                                                                                                                                                                                                                                          |
| EPI_ISL_2125024                                                                                                                                                                                                                                                                                                                                                                                                                                                                                                                                                                                                                                                                                                                                                                                                                                                                                                                                                                                                                                                                                               | Fraunhofer-Institut für Zelltherapie und Immunologie IZI AG                                                                         | Next-Generation Diagnostics                                                                                                                                                                                                    | Robert Koch Institute                                                                                                                                                                                                                                                                                                                                            |
| EPI_ISL_2262318                                                                                                                                                                                                                                                                                                                                                                                                                                                                                                                                                                                                                                                                                                                                                                                                                                                                                                                                                                                                                                                                                               | Fraunhofer-Institut für Zelltherapie und Immunologie IZI AG                                                                         | Next-Generation Diagnostics                                                                                                                                                                                                    | Robert Koch Institute                                                                                                                                                                                                                                                                                                                                            |
| EPI_ISL_1614854, EPI_ISL_1666372, EPI_ISL_1666379, EPI_ISL_1666447, EPI_ISL_1667317, EPI_ISL_1839348, EPI_ISL_1925954, EPI_ISL_1992667, EPI_ISL_1992684, EPI_ISL_1993163, EPI_ISL_2134078, EPI_ISL_2134105, EPI_ISL_2134268, EPI_ISL_2160771, EPI_ISL_2160774, EPI_ISL_2160840, EPI_ISL_2480069, EPI_ISL_2686545, EPI_ISL_2873487, EPI_ISL_2873516, EPI_ISL_2873747                                                                                                                                                                                                                                                                                                                                                                                                                                                                                                                                                                                                                                                                                                                                           | see above                                                                                                                           | Fulgent Genetics                                                                                                                                                                                                               | Centers for Disease Control and Prevention Division of Viral Diseases, Pathogen Discovery                                                                                                                                                                                                                                                                        |
| EPI_ISL_2620737                                                                                                                                                                                                                                                                                                                                                                                                                                                                                                                                                                                                                                                                                                                                                                                                                                                                                                                                                                                                                                                                                               | Functional Genomics and Proteomics Laboratory (FGPL), Department of Genetic Engineering and Biotechnology, University of Chittagong | Virology Laboratory, International Centre for Diarrhoeal Disease Research, Bangladesh (ICDDR,B)                                                                                                                                | Amit Datta; Amlan Bhattacharjee; Dr. Laila Khaleda; Dr. Mohammad Al-Forkan; Dr. Mohammad Enayet Hossain; Dr. Mustafizur Rahman; Dr. Sujat Paul; Inzamamul Ismail Shawon; Md. Abdur Rahman; Md. Jibran Alam; Miftah Mushfique; Mojnu Miah; Rahee Hasan Chowdhury; Rashedul Hasan; Shuva Das                                                                       |
| EPI_ISL_2311861                                                                                                                                                                                                                                                                                                                                                                                                                                                                                                                                                                                                                                                                                                                                                                                                                                                                                                                                                                                                                                                                                               | Fundação Ezequiel Dias                                                                                                              | Coordenação Geral de Laboratórios de Saúde Pública (CGLAB/DAEVS/SVS/MS)                                                                                                                                                        | Vagner Fonseca; et al.                                                                                                                                                                                                                                                                                                                                           |
| EPI_ISL_2333503, EPI_ISL_2333508, EPI_ISL_2333509, EPI_ISL_2333511, EPI_ISL_2333512, EPI_ISL_2425841, EPI_ISL_2491418, EPI_ISL_2491419, EPI_ISL_2491420, EPI_ISL_2491421, EPI_ISL_2491422, EPI_ISL_2491423, EPI_ISL_2491424, EPI_ISL_2491567, EPI_ISL_2491568, EPI_ISL_2549073, EPI_ISL_2549074, EPI_ISL_2549075, EPI_ISL_2549076, EPI_ISL_2549096, EPI_ISL_2549098, EPI_ISL_2611979, EPI_ISL_2611980, EPI_ISL_2643672, EPI_ISL_2644695, EPI_ISL_2644696, EPI_ISL_2644715, EPI_ISL_2673713, EPI_ISL_2673714, EPI_ISL_2673716, EPI_ISL_2673719, EPI_ISL_2673723, EPI_ISL_2673736, EPI_ISL_2673737, EPI_ISL_2673738, EPI_ISL_2673740, EPI_ISL_2673741, EPI_ISL_2673744, EPI_ISL_2673745, EPI_ISL_2673746, EPI_ISL_2673748, EPI_ISL_2673753, EPI_ISL_2673764, EPI_ISL_2673766, EPI_ISL_2675096, EPI_ISL_2688593, EPI_ISL_2688598, EPI_ISL_2725007, EPI_ISL_2725088, EPI_ISL_2725089, EPI_ISL_2725090, EPI_ISL_2788584, EPI_ISL_2788585, EPI_ISL_2788586, EPI_ISL_2788587, EPI_ISL_2788594, EPI_ISL_2790016, EPI_ISL_2790017, EPI_ISL_2820835, EPI_ISL_2820840, EPI_ISL_2820844, EPI_ISL_2820868, EPI_ISL_2820878 | see above                                                                                                                           | Furst Medical Laboratory                                                                                                                                                                                                       | Norwegian Institute of Public Health, Department of Virology                                                                                                                                                                                                                                                                                                     |
| EPI_ISL_2376424                                                                                                                                                                                                                                                                                                                                                                                                                                                                                                                                                                                                                                                                                                                                                                                                                                                                                                                                                                                                                                                                                               | GA Department of Public Health Laboratory                                                                                           | Genomics and Discovery, Respiratory Viruses Branch, Division of Viral Diseases, Centers for Disease Control and Prevention                                                                                                     | Adam Retchless; Anna Kelleher; Anna Uehara; Brian Lynch; Clinton R. Paden; Dhwani Batra; Haibin Wang; Han Jia Justin Ng; Jasmine Padilla; Jing Zhang; Justin Lee; Krista Queen; Mark Burroughs; Mili Sheth; Morgan Davis; Peter Cook; Rachel Marine; Paulsen Madsen; Olav Hungenes; Pedersen Benedikte Nevjen; Rasmus Riis Kopperud                              |
| EPI_ISL_2544823, EPI_ISL_2544835                                                                                                                                                                                                                                                                                                                                                                                                                                                                                                                                                                                                                                                                                                                                                                                                                                                                                                                                                                                                                                                                              | GMERS Government Medical College (GMC), Gotri                                                                                       | Gujarat Biotechnology Research Centre                                                                                                                                                                                          | Bithika Duttaroy; Chaitanya Joshi; Dinesh Kumar; Janvi Raval; Madhvi Joshi; Nitesh Shah; Nitin Savaliya; Ramesh Pandit; Sonal Sharma; Twinkle Soni; Umang Mishra; Zarna Patel; Zuber Saiyed                                                                                                                                                                      |
| EPI_ISL_2001183, EPI_ISL_2001140                                                                                                                                                                                                                                                                                                                                                                                                                                                                                                                                                                                                                                                                                                                                                                                                                                                                                                                                                                                                                                                                              | GMERS, Government Medical College (GMC), Gotri                                                                                      | Gujarat Biotechnology Research Centre                                                                                                                                                                                          | Bithika Duttaroy; Chaitanya Joshi; Dinesh Kumar; Janvi Raval; Madhvi Joshi; Nitesh Shah; Nitin Savaliya; Ramesh Pandit; Sonal Sharma; Twinkle Soni; Umang Mishra; Zarna Patel; Zuber Saiyed                                                                                                                                                                      |
| EPI_ISL_2726782                                                                                                                                                                                                                                                                                                                                                                                                                                                                                                                                                                                                                                                                                                                                                                                                                                                                                                                                                                                                                                                                                               | GenXOne SA                                                                                                                          | Gujarat Biotechnology Research Centre                                                                                                                                                                                          | Chaitanya Joshi; Dinesh Kumar; Gaurishankar Shrimali; Janvi Raval; Madhvi Joshi; Nitesh Shah; Nitin Savaliya; Ramesh Pandit; Sonal Sharma; Twinkle Soni; Umang Mishra; Zarna Patel; Zuber Saiyed                                                                                                                                                                 |
| EPI_ISL_2756159, EPI_ISL_2893002, EPI_ISL_2894958                                                                                                                                                                                                                                                                                                                                                                                                                                                                                                                                                                                                                                                                                                                                                                                                                                                                                                                                                                                                                                                             | Genetica Molecular and Subdepartamento de Virologia ISP Chile                                                                       | 1. National Institute of Public Health - National Institute of Hygiene, Warsaw, Poland 2. Biobank Lab, University of Lodz 3. Laboratory of Respiratory Viruses, Teaching and Clinical Center of the Medical University of Lodz | Dominik Strapagiel; Izabela Dróżdż; Jakub Lach; Katarzyna Zacharczuk; Klaudyna Królikowska; Maciej Borowiec; Magdalena Nowakowska; Magdalena Traczyk-Borszyńska; Marcin Słomka; Marta Sobalska-Kwapis; Małgorzata Sadkowska-Todys; Tomasz Płoszaj; Tomasz Wołkowicz                                                                                              |
| EPI_ISL_1942249, EPI_ISL_2036272                                                                                                                                                                                                                                                                                                                                                                                                                                                                                                                                                                                                                                                                                                                                                                                                                                                                                                                                                                                                                                                                              | Genome Centre                                                                                                                       | Genome Centre                                                                                                                                                                                                                  | A. S. M. Rubayet Ul Alam; Ali Ahsan Setu; Hassan M. Al-Emran; Hassan Md. Al-Emran; Iqbal Kabir Jahid; M. Anwar Hossain; M. Shaminur Rahman; M. Tanvir Islam; Md. Shazid Hasan; Md. Tanvir Islam; Ovinu Kibria Islam; Prosanto Kumar Das; Shovon Lal Sarkar; Tanay Chakrabarty                                                                                    |
| EPI_ISL_2565983, EPI_ISL_2773945, EPI_ISL_2773946, EPI_ISL_2854210, EPI_ISL_2861718                                                                                                                                                                                                                                                                                                                                                                                                                                                                                                                                                                                                                                                                                                                                                                                                                                                                                                                                                                                                                           | Genome Information Research Center, Research Institute for Microbial Diseases, Osaka University                                     | Genome Information Research Center, Research Institute for Microbial Diseases, Osaka University                                                                                                                                | Daisuke Mootooka; Hiroya Oki; Kentaro Tanaka; and Shota Nakamura                                                                                                                                                                                                                                                                                                 |
| EPI_ISL_2858872, EPI_ISL_2862010, EPI_ISL_2862016                                                                                                                                                                                                                                                                                                                                                                                                                                                                                                                                                                                                                                                                                                                                                                                                                                                                                                                                                                                                                                                             | Genomic Research Laboratory, Bangabandhu Sheikh Mujib Medical University                                                            | Genomic Research Laboratory, BSMMU                                                                                                                                                                                             | Arifa Akram; Laila Anjuman Banu; Md.Saydur Rahman; Md.Sharfuddin Ahmed; Sharadindu Kanti Sinha                                                                                                                                                                                                                                                                   |

|                                                                                                                                                                                                                                                                                                                                                                                                                                                                                                                                                                                                                                                                                                                         |                                                                                                      |                                                                                                                                |                                                                                                                                                                                                                                                                                                                                                                                                                                                                                                                                                                                                                                                                                                                         |
|-------------------------------------------------------------------------------------------------------------------------------------------------------------------------------------------------------------------------------------------------------------------------------------------------------------------------------------------------------------------------------------------------------------------------------------------------------------------------------------------------------------------------------------------------------------------------------------------------------------------------------------------------------------------------------------------------------------------------|------------------------------------------------------------------------------------------------------|--------------------------------------------------------------------------------------------------------------------------------|-------------------------------------------------------------------------------------------------------------------------------------------------------------------------------------------------------------------------------------------------------------------------------------------------------------------------------------------------------------------------------------------------------------------------------------------------------------------------------------------------------------------------------------------------------------------------------------------------------------------------------------------------------------------------------------------------------------------------|
| EPI_ISL_2862048                                                                                                                                                                                                                                                                                                                                                                                                                                                                                                                                                                                                                                                                                                         | Genomic Research Laboratory, Bangabandhu Sheikh Mujib Medical University (BSMMU) Shahbag, Dhaka_1000 | Genomic Research Laboratory, BSMMU                                                                                             | Arifa Akram; Laila Anjuman Banu; Md.Saydur Rahman; Md.Sharfuddin Ahmed; Sharadindu Kanti Sinha                                                                                                                                                                                                                                                                                                                                                                                                                                                                                                                                                                                                                          |
| EPI_ISL_2248870, EPI_ISL_2248871, EPI_ISL_2248874, EPI_ISL_2340152                                                                                                                                                                                                                                                                                                                                                                                                                                                                                                                                                                                                                                                      | Germano de Sousa                                                                                     | Instituto Nacional de Saude (INSA)                                                                                             | Borges et al                                                                                                                                                                                                                                                                                                                                                                                                                                                                                                                                                                                                                                                                                                            |
| EPI_ISL_2454302                                                                                                                                                                                                                                                                                                                                                                                                                                                                                                                                                                                                                                                                                                         | Greek Genome Center, Biomedical Research Foundation of the Academy of Athens (BRFAA)                 | Greek Genome Center, Biomedical Research Foundation of the Academy of Athens (BRFAA)                                           | Dimitrios Thanos; Emmanouil Athanasiadis; Giannis Vatsellas; Katerina Zoi; Theodoros Loupis                                                                                                                                                                                                                                                                                                                                                                                                                                                                                                                                                                                                                             |
| EPI_ISL_2364992                                                                                                                                                                                                                                                                                                                                                                                                                                                                                                                                                                                                                                                                                                         | Greek Genome Center, Biomedical Research Foundation of the Academy of Athens (BRFAA)                 | Greek Genome Center, Biomedical Research Foundation of the Academy of Athens (BRFAA)                                           | Dimitrios Thanos; Emmanouil Athanasiadis; Giannis Vatsellas; Katerina Zoi; Theodoros Loupis                                                                                                                                                                                                                                                                                                                                                                                                                                                                                                                                                                                                                             |
| EPI_ISL_2788689, EPI_ISL_2788711, EPI_ISL_2788717, EPI_ISL_2788719                                                                                                                                                                                                                                                                                                                                                                                                                                                                                                                                                                                                                                                      | Gunma Prefectural Institute of Public Health and Environmental Sciences                              | Gunma Prefectural Institute of Public Health and Environmental Sciences                                                        | Daisuke Shinoda; Hiroyuki Tsukagoshi; Kentaro Itokawa; Makoto Kuroda; Mariko Saito; Masanori Hashino; Rina Tanaka; Tsuyoshi Sekizuka                                                                                                                                                                                                                                                                                                                                                                                                                                                                                                                                                                                    |
| EPI_ISL_2695287                                                                                                                                                                                                                                                                                                                                                                                                                                                                                                                                                                                                                                                                                                         | H Braga                                                                                              | Instituto Nacional de Saude (INSA)                                                                                             | Borges et al                                                                                                                                                                                                                                                                                                                                                                                                                                                                                                                                                                                                                                                                                                            |
| EPI_ISL_2340227                                                                                                                                                                                                                                                                                                                                                                                                                                                                                                                                                                                                                                                                                                         | H Divino Espirito Santo - Ponta Delgada                                                              | Instituto Nacional de Saude (INSA)                                                                                             | Borges et al                                                                                                                                                                                                                                                                                                                                                                                                                                                                                                                                                                                                                                                                                                            |
| EPI_ISL_2694948, EPI_ISL_2895078                                                                                                                                                                                                                                                                                                                                                                                                                                                                                                                                                                                                                                                                                        | H Fernando Fonseca                                                                                   | Instituto Nacional de Saude (INSA)                                                                                             | Borges et al                                                                                                                                                                                                                                                                                                                                                                                                                                                                                                                                                                                                                                                                                                            |
| EPI_ISL_2536098                                                                                                                                                                                                                                                                                                                                                                                                                                                                                                                                                                                                                                                                                                         | H Forcas Armadas - Polo Lisboa                                                                       | Instituto Nacional de Saude (INSA)                                                                                             | Borges et al                                                                                                                                                                                                                                                                                                                                                                                                                                                                                                                                                                                                                                                                                                            |
| EPI_ISL_2695075                                                                                                                                                                                                                                                                                                                                                                                                                                                                                                                                                                                                                                                                                                         | H Vila Franca Xira                                                                                   | Instituto Nacional de Saude (INSA)                                                                                             | Borges et al                                                                                                                                                                                                                                                                                                                                                                                                                                                                                                                                                                                                                                                                                                            |
| EPI_ISL_2029113, EPI_ISL_2029114                                                                                                                                                                                                                                                                                                                                                                                                                                                                                                                                                                                                                                                                                        | HEGP - Laboratoire de Virologie                                                                      | HEGP - Laboratoire de Virologie                                                                                                | David Veyer; H  l  ne P  r  ; Julien Puech; Maxime Wack; Nicolas Robillard; Sandrine Imbeaud                                                                                                                                                                                                                                                                                                                                                                                                                                                                                                                                                                                                                            |
| EPI_ISL_2385214, EPI_ISL_2385226, EPI_ISL_2385230, EPI_ISL_2385242, EPI_ISL_2385266, EPI_ISL_2385267, EPI_ISL_2385279, EPI_ISL_2385280, EPI_ISL_2385284, EPI_ISL_2385288, EPI_ISL_2385292, EPI_ISL_2385308, EPI_ISL_2450606, EPI_ISL_2523633, EPI_ISL_2523639                                                                                                                                                                                                                                                                                                                                                                                                                                                           | see above                                                                                            | WHO National Influenza Centre Russian Federation                                                                               | Andrey Komissarov; Artem Fadeev; Daria Danilenko; Dmitry Lioznov; Elena Nabieva; Georgii Bazzykin; Kirill Varchenko; Ksenia Safina; Kseniya Komissarova; Maria Pisareva; Maria Timofeeva; Mikhail Bakaev; Nikita Yolshin; Oula Mansour; Oula Masour; Tamila Musaeva; Veronika Eder                                                                                                                                                                                                                                                                                                                                                                                                                                      |
| EPI_ISL_4562854                                                                                                                                                                                                                                                                                                                                                                                                                                                                                                                                                                                                                                                                                                         | HIV Research Laboratory                                                                              | Salemi Lab, University of Florida                                                                                              | Cash MN; Lauzardo M; Magalis BR; Mavian C; Riva A; Salemi M; Tagliamonte MS                                                                                                                                                                                                                                                                                                                                                                                                                                                                                                                                                                                                                                             |
| EPI_ISL_2731451, EPI_ISL_2731452                                                                                                                                                                                                                                                                                                                                                                                                                                                                                                                                                                                                                                                                                        | HLAGYN-Laborat  rio de Imunologia de Transplantes de Goi  s                                          | Laboratory of Respiratory Viruses and Measles, Oswaldo Cruz Institute, FIOCRUZ                                                 | Alice Sampaio Rocha; Ana Carolina Mendonca; Anna Carolina Paixao; Elisa Cavalcante Pereira; Fernando Motta; Luciana Appolinario; Marilda Siqueira on behalf of the Fiocruz COVID-19 Genomic Surveillance Network; Paola Resende; Renata Serrano Lopes; Tania Venas                                                                                                                                                                                                                                                                                                                                                                                                                                                      |
| EPI_ISL_1904992, EPI_ISL_1904994, EPI_ISL_1904998                                                                                                                                                                                                                                                                                                                                                                                                                                                                                                                                                                                                                                                                       | HOPITAL SAINT ANDRE                                                                                  | CNR Virus des Infections Respiratoires - France SUD                                                                            | Antonin Bal; Bruno Lina; Gregory Destras; Gwendolynne Burfin; Hadrien Regue; Laurence Josset; Martine Valette; Quentin Semanas                                                                                                                                                                                                                                                                                                                                                                                                                                                                                                                                                                                          |
| EPI_ISL_2134906, EPI_ISL_2134911, EPI_ISL_2361925, EPI_ISL_2361946, EPI_ISL_2626103, EPI_ISL_2626151, EPI_ISL_2626158, EPI_ISL_2710232, EPI_ISL_2710234, EPI_ISL_2710236, EPI_ISL_2812710, EPI_ISL_2812724, EPI_ISL_2812726, EPI_ISL_2812752, EPI_ISL_2812756                                                                                                                                                                                                                                                                                                                                                                                                                                                           | see above                                                                                            | HOSPITAL UNIVERSITARIO SON ESPASES                                                                                             | Antonio Oliver; Carla L  pez-Causap  ; Hospital Universitario Son Espases; Pablo Fraile-Ribot; SeqCovid; Servicio de Microbiolog  a                                                                                                                                                                                                                                                                                                                                                                                                                                                                                                                                                                                     |
| EPI_ISL_2511336, EPI_ISL_2682098, EPI_ISL_2765983, EPI_ISL_2779674                                                                                                                                                                                                                                                                                                                                                                                                                                                                                                                                                                                                                                                      | Health Services Laboratories                                                                         | Wellcome Sanger Institute for the COVID-19 Genomics UK (COG-UK) Consortium                                                     | Cordelia Langford; David K. Jackson; Dominic Kwiatkowski; Ewan Harrison; Health Services Laboratories and Alex Alderton; Ian Johnston; Jeffrey Barrett; John Sillitoe on behalf of the Wellcome Sanger Institute COVID-19 Surveillance Team; Roberto Amato; Sonia Goncalves                                                                                                                                                                                                                                                                                                                                                                                                                                             |
| EPI_ISL_1512099, EPI_ISL_1576106, EPI_ISL_1735500, EPI_ISL_1907632, EPI_ISL_1923785, EPI_ISL_1923911, EPI_ISL_1923955, EPI_ISL_1942165, EPI_ISL_1990856, EPI_ISL_2009735, EPI_ISL_2010430, EPI_ISL_2010872, EPI_ISL_2098013, EPI_ISL_2144255, EPI_ISL_2145113, EPI_ISL_2159577, EPI_ISL_2159751, EPI_ISL_2160284, EPI_ISL_2160637, EPI_ISL_2247397, EPI_ISL_2247606, EPI_ISL_2247625, EPI_ISL_2247704, EPI_ISL_2248458, EPI_ISL_2269619, EPI_ISL_2269822, EPI_ISL_2270252, EPI_ISL_2270430, EPI_ISL_2270535, EPI_ISL_2270570, EPI_ISL_2270707, EPI_ISL_2270722, EPI_ISL_2320572, EPI_ISL_2320767, EPI_ISL_2321076, EPI_ISL_2321077, EPI_ISL_2440107, EPI_ISL_2440260, EPI_ISL_2440528, EPI_ISL_2598863, EPI_ISL_2599267 | see above                                                                                            | Centers for Disease Control and Prevention Division of Viral Diseases, Pathogen Discovery                                      | Adrian Paskey; Alexandre Bolze; Ary Ascencio; Benjamin Rambo-Martin; Brad Sickler; Charlotte Rivera-Garcia; Christine Tran; Christopher Gulvick; Clinton R. Paden; Dakota Howard; Darlene Wagner; David Becker; Dhvani Batra; Duncan MacCannell; Efr  n Sandoval; Eileen de Feo; Elizabeth Cirulli; Eric Allen; Geraint Levau; James Lu; Jan Antico; Jason Caravas; Jason Nguyen; Jimmy Ramirez; Jingtao Liu; Kara Moser; Kelly Schiabor Barrett; Kim Gietzen; Magnus Isaksson; Marc Laurent; Matthew Schmerer; Matthew Tolentino; Nicole L. Washington; Peter W. Cook; Phil Febbo; Ryan Cho; Scott Sammons; Shannon Wickline; Shatavia Morrison; Sherry Wang; Simon White; Tyler Cassens; William Lee; Yvette Onuamrhi |
| EPI_ISL_2530206, EPI_ISL_2600958                                                                                                                                                                                                                                                                                                                                                                                                                                                                                                                                                                                                                                                                                        | Hematopathology Laboratory, ACTREC, TMC                                                              | Hematopathology Laboratory, ACTREC, TMC                                                                                        | ACTREC; Hematopathology Laboratory                                                                                                                                                                                                                                                                                                                                                                                                                                                                                                                                                                                                                                                                                      |
| EPI_ISL_2029931, EPI_ISL_2188352, EPI_ISL_2188418, EPI_ISL_2188419, EPI_ISL_2188450, EPI_ISL_2188452, EPI_ISL_2293281, EPI_ISL_2293284, EPI_ISL_2293285, EPI_ISL_2293303, EPI_ISL_2293304, EPI_ISL_2293305, EPI_ISL_2293306, EPI_ISL_2293307, EPI_ISL_2293308, EPI_ISL_2462965, EPI_ISL_2535475, EPI_ISL_2757663, EPI_ISL_2757664, EPI_ISL_2757665, EPI_ISL_2757666, EPI_ISL_2757667, EPI_ISL_2757668, EPI_ISL_2757669, EPI_ISL_2757670, EPI_ISL_2757671, EPI_ISL_2757672, EPI_ISL_2757673, EPI_ISL_2757674, EPI_ISL_2757675, EPI_ISL_2757676, EPI_ISL_2757677, EPI_ISL_2757678, EPI_ISL_2790981, EPI_ISL_2790982, EPI_ISL_2790983, EPI_ISL_2790984, EPI_ISL_2835879                                                    | see above                                                                                            | Hospital                                                                                                                       | National Reference Center for Viruses of Respiratory Infections, Institut Pasteur, Paris                                                                                                                                                                                                                                                                                                                                                                                                                                                                                                                                                                                                                                |
| EPI_ISL_2727836                                                                                                                                                                                                                                                                                                                                                                                                                                                                                                                                                                                                                                                                                                         | Hospital Angkatan Tentera Kota Kinabalu                                                              | Institute for Medical Research, Infectious Disease Research Centre, National Institutes of Health, Ministry of Health Malaysia | Azizan MA; Kamel K; Mohd Zawawi Z; Ramly N; Robert F; Suppiah J; Thayan R                                                                                                                                                                                                                                                                                                                                                                                                                                                                                                                                                                                                                                               |
| EPI_ISL_2727837                                                                                                                                                                                                                                                                                                                                                                                                                                                                                                                                                                                                                                                                                                         | Hospital Angkatan Tentera Wilayah Kota Kinabalu                                                      | Institute for Medical Research, Infectious Disease Research Centre, National Institutes of Health, Ministry of Health Malaysia | Azizan MA; Kamel K; Mohd Zawawi Z; Ramly N; Robert F; Suppiah J; Thayan R                                                                                                                                                                                                                                                                                                                                                                                                                                                                                                                                                                                                                                               |
| EPI_ISL_2401863                                                                                                                                                                                                                                                                                                                                                                                                                                                                                                                                                                                                                                                                                                         | Hospital Center Emile Mayr  sch                                                                      | Laboratoire national de s  nte, Microbiology, Microbial Genomics Platform                                                      | Anke Wienecke-Baldacchino; Catherine Ragimbeau; Cynthia Oxacelay; Fatu Djabi; Jessica Tapp; Lise Pignon; Raoul Salmon; Tamir Abdelrahman                                                                                                                                                                                                                                                                                                                                                                                                                                                                                                                                                                                |
| EPI_ISL_1917450, EPI_ISL_2401928                                                                                                                                                                                                                                                                                                                                                                                                                                                                                                                                                                                                                                                                                        | Hospital Center Luxembourg                                                                           | Laboratoire national de s  nte, Microbiology, Microbial Genomics Platform                                                      | Anke Wienecke-Baldacchino; Catherine Ragimbeau; Fatu Djabi; Jean-Hugues Francois; Jessica Tapp; Lise Pignon; Michel Kohnen; Raoul Salmon; Tamir Abdelrahman                                                                                                                                                                                                                                                                                                                                                                                                                                                                                                                                                             |
| EPI_ISL_2680929                                                                                                                                                                                                                                                                                                                                                                                                                                                                                                                                                                                                                                                                                                         | Hospital F  tima S.A. de C.V.                                                                        | Laboratorio nacional-LANIA-CIAD                                                                                                | : Alejandra Garc  a-Gasca; Alejandra Hern  ndez-Ter  n; Alejandro S  nchez-Flores; Alfredo Herrera-Estrella; Alicia Oca  a-Mondrag  n; Andreu Comas-Garc  a; Angel Gustavo Salas-Lais; Antonio Loza Rom  n; Bernardo Mart  nez-Miguel; Blanca Taboada; Brenda Irasema Maldonado-Meza; Bruno G  mez-Gil; Carla Iv  n Herrera-Najera; Carlos F. Arias; Cel  a Boukadid; Clara Esperanza Santacruz-Tinoco; Concepci  n Grajales-Mu  iz; Consorcio Mexicano de Vigilancia Gen  mica (CoViGen-Mex). Authors (in alphabetical order): Julio Elias Alvarado-Yaah; Crist  bal Ch  idez-Quir  s; C  lida Duque Molina; C  lida Mart  nez- Rodr  guez; Daniel Fregoso-Rueda; Daniel Lira Morales; Eduardo Becerril-V              |

|                                                                                                                                                                                                                                                                                                                                                                                                                                         |                                                                                |                                                                                                                                                         |                                                                                                                                                                                                                                                                                                                                                                                                                                                                                                                                                                                                                                                                                                                                                                                                                                                                                                                                                                                                                                                                                                                                                                                                                                                                                                                                                                                                                                                                                                                                                                                 |
|-----------------------------------------------------------------------------------------------------------------------------------------------------------------------------------------------------------------------------------------------------------------------------------------------------------------------------------------------------------------------------------------------------------------------------------------|--------------------------------------------------------------------------------|---------------------------------------------------------------------------------------------------------------------------------------------------------|---------------------------------------------------------------------------------------------------------------------------------------------------------------------------------------------------------------------------------------------------------------------------------------------------------------------------------------------------------------------------------------------------------------------------------------------------------------------------------------------------------------------------------------------------------------------------------------------------------------------------------------------------------------------------------------------------------------------------------------------------------------------------------------------------------------------------------------------------------------------------------------------------------------------------------------------------------------------------------------------------------------------------------------------------------------------------------------------------------------------------------------------------------------------------------------------------------------------------------------------------------------------------------------------------------------------------------------------------------------------------------------------------------------------------------------------------------------------------------------------------------------------------------------------------------------------------------|
| EPI_ISL_2824960                                                                                                                                                                                                                                                                                                                                                                                                                         |                                                                                |                                                                                                                                                         |                                                                                                                                                                                                                                                                                                                                                                                                                                                                                                                                                                                                                                                                                                                                                                                                                                                                                                                                                                                                                                                                                                                                                                                                                                                                                                                                                                                                                                                                                                                                                                                 |
| EPI_ISL_1908856, EPI_ISL_2047772, EPI_ISL_2047773, EPI_ISL_2284917, EPI_ISL_2284919, EPI_ISL_2391814, EPI_ISL_2391843, EPI_ISL_2391913, EPI_ISL_2458125, EPI_ISL_2493132, EPI_ISL_2493136, EPI_ISL_2628127, EPI_ISL_2628155, EPI_ISL_2628158, EPI_ISL_2712846, EPI_ISL_2828129, EPI_ISL_2828137, EPI_ISL_2828143, EPI_ISL_2828174, EPI_ISL_2885272, EPI_ISL_2885284, EPI_ISL_2885292, EPI_ISL_2885327, EPI_ISL_2885348, EPI_ISL_2885349 | Hospital Universitari Vall d'Hebron - Vall d'Hebron Institut de Recerca        | Hospital Universitari Vall d'Hebron - Vall d'Hebron Institut de Recerca                                                                                 | Alejandra González-Sánchez; Andrés Antón; Ariadna Rando; Carla Castillo; Cristina Andrés; Damir Garcia-Cehic; Josep Quer; Juliana Esperalba; Karen García; Maria Carmen Martin; Maria Gema Codina; Maria Piñana; Rodrigo Vásquez; Tomás Pumarola                                                                                                                                                                                                                                                                                                                                                                                                                                                                                                                                                                                                                                                                                                                                                                                                                                                                                                                                                                                                                                                                                                                                                                                                                                                                                                                                |
| see above                                                                                                                                                                                                                                                                                                                                                                                                                               |                                                                                |                                                                                                                                                         |                                                                                                                                                                                                                                                                                                                                                                                                                                                                                                                                                                                                                                                                                                                                                                                                                                                                                                                                                                                                                                                                                                                                                                                                                                                                                                                                                                                                                                                                                                                                                                                 |
| EPI_ISL_2775929, EPI_ISL_2775937, EPI_ISL_2775967, EPI_ISL_2775984                                                                                                                                                                                                                                                                                                                                                                      | Hospital Universitari i Politècnic La Fe de València                           | SeqCOVID-SPAIN consortium/IBV(CSIC)                                                                                                                     | Ana Gil Brusola; Eva González Barberá; José Luis López Hontangas and SeqCOVID-SPAIN consortium; María Dolores Gómez Ruiz; Salvador Giner Almaraz                                                                                                                                                                                                                                                                                                                                                                                                                                                                                                                                                                                                                                                                                                                                                                                                                                                                                                                                                                                                                                                                                                                                                                                                                                                                                                                                                                                                                                |
| EPI_ISL_1941875, EPI_ISL_2091014                                                                                                                                                                                                                                                                                                                                                                                                        | Hospital Universitario Cruces                                                  | Biocruces Bizkaia                                                                                                                                       | Ana Belen de la Hoz; Mikel Gallego                                                                                                                                                                                                                                                                                                                                                                                                                                                                                                                                                                                                                                                                                                                                                                                                                                                                                                                                                                                                                                                                                                                                                                                                                                                                                                                                                                                                                                                                                                                                              |
| EPI_ISL_2788595                                                                                                                                                                                                                                                                                                                                                                                                                         | Hospital of Southern Norway - Kristiansand, Department of Medical Microbiology | Norwegian Institute of Public Health, Department of Virology                                                                                            | Atiya R Ali; Debech Nadia; Engebretsen Serina Beate; Garcia Llorente Ignacio; Hilde Elshaug; Hilde Vollan; Jon Bråte; Kamilla Heddeland Instefjord; Karoline Bragstad; Kathrine Stene-Johansen; Line Victoria Moen; Marie Paulsen Madsen; Olav Hungnes; Pedersen Benedikte Nevjen; Rasmus Riis Kopperud                                                                                                                                                                                                                                                                                                                                                                                                                                                                                                                                                                                                                                                                                                                                                                                                                                                                                                                                                                                                                                                                                                                                                                                                                                                                         |
| EPI_ISL_2860648, EPI_ISL_2860764                                                                                                                                                                                                                                                                                                                                                                                                        | Hyogo Prefectural Institute of Public Health science                           | Pathogen Genomics Center, National Institute of Infectious Diseases                                                                                     | Denshi Takai; Etsuko Saito; Kenichi Ogita; Kentaro Itokawa; Kyoko Suzuki; Masanori Hashino; Masatsugu Chikahira; Miki Ogi; Rina Tanaka; Tomohiro Oshibe; Tsuyoshi Sekizuka; Yumi Akiyama                                                                                                                                                                                                                                                                                                                                                                                                                                                                                                                                                                                                                                                                                                                                                                                                                                                                                                                                                                                                                                                                                                                                                                                                                                                                                                                                                                                        |
| EPI_ISL_2790911, EPI_ISL_2790947, EPI_ISL_2790953, EPI_ISL_2790954                                                                                                                                                                                                                                                                                                                                                                      | Hôpital                                                                        | National Reference Center for Viruses of Respiratory Infections, Institut Pasteur, Paris                                                                | Angela Brisebarre; BêNéDicte Roquebert; Camille Capel; Christophe Malabat; Corinne Maufrais; Emmanuelle Permal; Etienne Simon-Lorière; Frédéric Lemoine; Louise Lefrançois; Marion Barbet; Maud Vanpeeene; Méline Bizard; Nabil Gastli; Sylvie Behillil; Sylvie Van der Werf; Vincent Enouf                                                                                                                                                                                                                                                                                                                                                                                                                                                                                                                                                                                                                                                                                                                                                                                                                                                                                                                                                                                                                                                                                                                                                                                                                                                                                     |
| EPI_ISL_2228723                                                                                                                                                                                                                                                                                                                                                                                                                         | Hôpital Avicenne                                                               | Department of Virology, Henri Mondor University Hospital, Assistance Publique Hôpitaux de Paris, Université Paris-Est Créteil, INSERM U955              | Alexandre Soulier; Christophe Rodriguez; Elisabeth Trawinski; Guillaume Gricourt; Jean-Michel Pawlotsky; Melissa N'Debi; Slim Fourati; Vanessa Demontant                                                                                                                                                                                                                                                                                                                                                                                                                                                                                                                                                                                                                                                                                                                                                                                                                                                                                                                                                                                                                                                                                                                                                                                                                                                                                                                                                                                                                        |
| EPI_ISL_2878324                                                                                                                                                                                                                                                                                                                                                                                                                         | Hôpital Cochin                                                                 | Department of Virology, Henri Mondor University Hospital, Assistance Publique Hôpitaux de Paris, Université Paris-Est Créteil, INSERM U955              | Alexandre Soulier; Christophe Rodriguez; Elisabeth Trawinski; Guillaume Gricourt; Jean-Michel Pawlotsky; Melissa N'Debi; Slim Fourati; Vanessa Demontant                                                                                                                                                                                                                                                                                                                                                                                                                                                                                                                                                                                                                                                                                                                                                                                                                                                                                                                                                                                                                                                                                                                                                                                                                                                                                                                                                                                                                        |
| EPI_ISL_2400536                                                                                                                                                                                                                                                                                                                                                                                                                         | Hôpitaux Robert Schuman                                                        | Laboratoire national de sante, Microbiology, Microbial Genomics Platform                                                                                | Alain Hakim; Anke Wienecke-Baldacchino; Catherine Ragimbeau; Fatu Djabi; Jessica Tapp; Lise Pignon; Nawfal Faik; Raoul Salmon; Tamir Abdelrahman                                                                                                                                                                                                                                                                                                                                                                                                                                                                                                                                                                                                                                                                                                                                                                                                                                                                                                                                                                                                                                                                                                                                                                                                                                                                                                                                                                                                                                |
| EPI_ISL_2384050                                                                                                                                                                                                                                                                                                                                                                                                                         | IA State Hygienic Laboratory                                                   | Centers for Disease Control and Prevention Division of Viral Diseases, Pathogen Discovery                                                               | Alison Laufer Halpin; Ben L. Rambo-Martin; Clinton R. Paden; Dakota Howard; Darlene Wagner; Dave Wentworth; Dhwanj Batra; Jasmine Padilla; Justin Lee; Katie Dillon; Krista Queen; Kristen Knipe; Kristine Lacek; Mark Burroughs; Matthew Schmerer; Milli Sheth; Peter Cook; Sam Shepard; Sarah Nobles; Shoshona Le; Suxiang Tong; Vivien Dugan; Yvette Unoarumhi                                                                                                                                                                                                                                                                                                                                                                                                                                                                                                                                                                                                                                                                                                                                                                                                                                                                                                                                                                                                                                                                                                                                                                                                               |
| EPI_ISL_2189642, EPI_ISL_2189698, EPI_ISL_2189765, EPI_ISL_2189773                                                                                                                                                                                                                                                                                                                                                                      | ICMR-National Institute of Virology                                            | NCDC Delhi, Biotechnology Division                                                                                                                      | A Walimbe; A.Awhale; A.Titkare; B.Apoorva; G.Divekar; H.Kengale; Hema Gogia; Hemlata Lali; K.P.Shinde; K.Iyengar; K.Korabu; Kalaiarasan Ponnusamy; M L Choudhary; M.Das; Mahesh S Dhar; Manoj K Singh; Meena Datta; Partha Rakshit; Preeti Madan; Priyanka Singh; R.Verma; Radhakrishnan V. S.; Robin Marwal; S.Jadhav; S.Shroekar; S.Shelkande; Sandhya Kabra; Sujeet K Singh; T.Sanjeevi; U.Saha; Uma Sharma; V.Malik; V.Autde; V.Vipat; Z. Sayyed                                                                                                                                                                                                                                                                                                                                                                                                                                                                                                                                                                                                                                                                                                                                                                                                                                                                                                                                                                                                                                                                                                                            |
| EPI_ISL_1704605, EPI_ISL_1704620, EPI_ISL_1704627, EPI_ISL_1704628, EPI_ISL_1704634, EPI_ISL_1841276, EPI_ISL_1841293, EPI_ISL_1841366, EPI_ISL_1928417, EPI_ISL_1928541, EPI_ISL_2546136, EPI_ISL_2546156, EPI_ISL_2546550, EPI_ISL_2546567, EPI_ISL_2546721, EPI_ISL_2546854, EPI_ISL_2547110, EPI_ISL_2547124, EPI_ISL_2547162, EPI_ISL_2547185, EPI_ISL_2547219, EPI_ISL_2547226                                                    | ICMR-National Institute of Virology - INSACOG                                  | NIV Influenza                                                                                                                                           | Dr. Varsha Potdar; Dr. Varsha Potdar and NIC Team                                                                                                                                                                                                                                                                                                                                                                                                                                                                                                                                                                                                                                                                                                                                                                                                                                                                                                                                                                                                                                                                                                                                                                                                                                                                                                                                                                                                                                                                                                                               |
| EPI_ISL_1825677                                                                                                                                                                                                                                                                                                                                                                                                                         | IHU Méditerranée Infection                                                     | IHU Méditerranée Infection                                                                                                                              | Bernard La Scola et al.                                                                                                                                                                                                                                                                                                                                                                                                                                                                                                                                                                                                                                                                                                                                                                                                                                                                                                                                                                                                                                                                                                                                                                                                                                                                                                                                                                                                                                                                                                                                                         |
| EPI_ISL_2801430, EPI_ISL_2801431, EPI_ISL_2801432                                                                                                                                                                                                                                                                                                                                                                                       | IHIT Pracownia Wirusologii Klinicznej                                          | National Institute of Public Health - National Institute of Hygiene                                                                                     | Gierczyński Rafał; Sadkowska-Todys Małgorzata; Wołkowicz Tomasz                                                                                                                                                                                                                                                                                                                                                                                                                                                                                                                                                                                                                                                                                                                                                                                                                                                                                                                                                                                                                                                                                                                                                                                                                                                                                                                                                                                                                                                                                                                 |
| EPI_ISL_2758180                                                                                                                                                                                                                                                                                                                                                                                                                         | ILV Kärnten                                                                    | Berghaler laboratory, CeMM Research Center for Molecular Medicine of the Austrian Academy of Sciences                                                   | Andreas Berghaler; Anna Schedl; Bekir Erguner; Benedikt Agerer; Christoph Bock; Fabian Amman; Jan Laine; Lukas Endler; Maelle Le Moing; Martin Senekowitsch; Matthew Thornton; Michael Schuster; Petr Triska; Thomas Penz                                                                                                                                                                                                                                                                                                                                                                                                                                                                                                                                                                                                                                                                                                                                                                                                                                                                                                                                                                                                                                                                                                                                                                                                                                                                                                                                                       |
| EPI_ISL_2420245                                                                                                                                                                                                                                                                                                                                                                                                                         | IN State Department of Health Laboratory Services                              | IN State Department of Health Laboratory Services                                                                                                       | Brian Pope; Cassandra Campion; Jamie Yeadon; Kyle Brownlee; Lixia Liu; Mark Glazier; Melissa Hindenlang                                                                                                                                                                                                                                                                                                                                                                                                                                                                                                                                                                                                                                                                                                                                                                                                                                                                                                                                                                                                                                                                                                                                                                                                                                                                                                                                                                                                                                                                         |
| EPI_ISL_2000617, EPI_ISL_2000619, EPI_ISL_2000620, EPI_ISL_2000621, EPI_ISL_2000625, EPI_ISL_2000626                                                                                                                                                                                                                                                                                                                                    | INMI Lazzaro Spallanzani IRCCS                                                 | INMI Lazzaro Spallanzani IRCCS                                                                                                                          | A Di Caro; B Bartolini; CEM Gruber; E Giombini; F Messina; F Santini; G Bonfiglio; M Rueca; MR Capobianchi; O Butera                                                                                                                                                                                                                                                                                                                                                                                                                                                                                                                                                                                                                                                                                                                                                                                                                                                                                                                                                                                                                                                                                                                                                                                                                                                                                                                                                                                                                                                            |
| see above                                                                                                                                                                                                                                                                                                                                                                                                                               | INSACOG Surveillance                                                           | INSACOG at CSIR Institute of Genomics and Integrative Biology                                                                                           | INSACOG                                                                                                                                                                                                                                                                                                                                                                                                                                                                                                                                                                                                                                                                                                                                                                                                                                                                                                                                                                                                                                                                                                                                                                                                                                                                                                                                                                                                                                                                                                                                                                         |
| EPI_ISL_2503826                                                                                                                                                                                                                                                                                                                                                                                                                         | INSACOG-ARUNACHAL PRADESH                                                      | National Institute of Biomedical Genomics – INSACOG                                                                                                     | Arindam Maitra; Lobsang Jampa; Mika Umpo; Nidhan Kumar Biswas; Saumitra Das; Sreedhar Chinnaswamy; Yompe Kamki                                                                                                                                                                                                                                                                                                                                                                                                                                                                                                                                                                                                                                                                                                                                                                                                                                                                                                                                                                                                                                                                                                                                                                                                                                                                                                                                                                                                                                                                  |
| EPI_ISL_2877823, EPI_ISL_2877826                                                                                                                                                                                                                                                                                                                                                                                                        | INSACOG-Assam                                                                  | National Institute of Biomedical Genomics – INSACOG                                                                                                     | Ajanta Sharma; Arindam Maitra; Kailash Chamuah; Lahari Saikia; Nidhan Kumar Biswas; Saumitra Das; Sreedhar Chinnaswamy                                                                                                                                                                                                                                                                                                                                                                                                                                                                                                                                                                                                                                                                                                                                                                                                                                                                                                                                                                                                                                                                                                                                                                                                                                                                                                                                                                                                                                                          |
| EPI_ISL_2547448                                                                                                                                                                                                                                                                                                                                                                                                                         | INSACOG-MEGHALAYA                                                              | National Institute of Biomedical Genomics – INSACOG                                                                                                     | Arindam Maitra; E Marak; E Shadap; Nidhan Kumar Biswas; R. Lyngdoh; Saumitra Das; Sreedhar Chinnaswamy                                                                                                                                                                                                                                                                                                                                                                                                                                                                                                                                                                                                                                                                                                                                                                                                                                                                                                                                                                                                                                                                                                                                                                                                                                                                                                                                                                                                                                                                          |
| EPI_ISL_2521601, EPI_ISL_2521605, EPI_ISL_2521606                                                                                                                                                                                                                                                                                                                                                                                       | INSACOG-Mizoram                                                                | National Institute of Biomedical Genomics – INSACOG                                                                                                     | Arindam Maitra; Gracy Laldinmawii; N Senthil Kumar; Nidhan Kumar Biswas; Saumitra Das; Sreedhar Chinnaswamy; Swagnik Roy                                                                                                                                                                                                                                                                                                                                                                                                                                                                                                                                                                                                                                                                                                                                                                                                                                                                                                                                                                                                                                                                                                                                                                                                                                                                                                                                                                                                                                                        |
| EPI_ISL_2675337                                                                                                                                                                                                                                                                                                                                                                                                                         | INSACOG-NAGALAND                                                               | National Institute of Biomedical Genomics – INSACOG                                                                                                     | Arindam Maitra; Chenole Keppen; Nidhan Kumar Biswas; Saumitra Das; Sreedhar Chinnaswamy; Vinosole Khamo; Wetetsho Kapfo                                                                                                                                                                                                                                                                                                                                                                                                                                                                                                                                                                                                                                                                                                                                                                                                                                                                                                                                                                                                                                                                                                                                                                                                                                                                                                                                                                                                                                                         |
| EPI_ISL_2878033                                                                                                                                                                                                                                                                                                                                                                                                                         | INSACOG-Tripura                                                                | National Institute of Biomedical Genomics – INSACOG                                                                                                     | Apurba Sarkar; Arindam Maitra; Nidhan Kumar Biswas; Saikat Majumder; Saumitra Das; Sreedhar Chinnaswamy; Tapan Majumdar                                                                                                                                                                                                                                                                                                                                                                                                                                                                                                                                                                                                                                                                                                                                                                                                                                                                                                                                                                                                                                                                                                                                                                                                                                                                                                                                                                                                                                                         |
| EPI_ISL_1589872, EPI_ISL_1589872, EPI_ISL_2503246, EPI_ISL_2503358, EPI_ISL_2503615, EPI_ISL_2503641, EPI_ISL_2503739, EPI_ISL_2548465, EPI_ISL_2548631, EPI_ISL_2548641, EPI_ISL_2548684, EPI_ISL_2548904, EPI_ISL_2549015, EPI_ISL_2675917, EPI_ISL_2676176, EPI_ISL_2676229, EPI_ISL_2676273, EPI_ISL_2676309, EPI_ISL_2676321, EPI_ISL_2676341, EPI_ISL_2676343, EPI_ISL_2676347, EPI_ISL_2860944, EPI_ISL_2860959                  | INSACOG-WB                                                                     | National Institute of Biomedical Genomics – INSACOG                                                                                                     | Ajay Chakraborti; Arindam Maitra; Bhaswati Bandyopadhyay; Nidhan Kumar Biswas; Saumitra Das; Sreedhar Chinnaswamy; Tamal Ghosh                                                                                                                                                                                                                                                                                                                                                                                                                                                                                                                                                                                                                                                                                                                                                                                                                                                                                                                                                                                                                                                                                                                                                                                                                                                                                                                                                                                                                                                  |
| see above                                                                                                                                                                                                                                                                                                                                                                                                                               | INSIDE DIAGNÓSTICOS                                                            | Instituto Butantan                                                                                                                                      | Antonio Jorge Martins; Claudia Renata dos Santos Barros; David Schlesinger; Debora Botequiu Moretti; Dimas Tadeu Covas; Elaine Cristina Marqueze; Elaine Vieira Santos; Evandra Strazza Rodrigues; Heidge Fukumasu; Jayme Augusto de Souza-Neto; José Salvatore Leister Patané; Luiz Alcantara; Luiz Lehmann Coutinho; Maria Carolina Elias; Mauricio Lacerda Nogueira; Rafael dos Santos Bezerra; Raul Machado Neto; Rejane Maria Tommasini Grotto; Ricardo Haddad; Sandra Coccuzzo Sampaio Vessoni; Simone Kashima; Svetoslav Nanev Slavov; Vincent Louis Viala                                                                                                                                                                                                                                                                                                                                                                                                                                                                                                                                                                                                                                                                                                                                                                                                                                                                                                                                                                                                               |
| EPI_ISL_2895665, EPI_ISL_2895666, EPI_ISL_2895667, EPI_ISL_2895669, EPI_ISL_2895670, EPI_ISL_2895671, EPI_ISL_2895673, EPI_ISL_2895674                                                                                                                                                                                                                                                                                                  | INSPI-CRN DE INFLUENZA Y OTROS VIRUS RESPIRATORIOS                             | NIC-INSPI                                                                                                                                               | Alfredo Bruno; Domenica de Mora.; Jimmy Garcés; Johanna Laines; Lizbeth Patiño; Manuel Gonzalez; Maritza Olmedo; Michelle Páez                                                                                                                                                                                                                                                                                                                                                                                                                                                                                                                                                                                                                                                                                                                                                                                                                                                                                                                                                                                                                                                                                                                                                                                                                                                                                                                                                                                                                                                  |
| see above                                                                                                                                                                                                                                                                                                                                                                                                                               | IRCCS San Gallicano Dermatological Institute                                   | IRCCS Regina Elena National Cancer Institute                                                                                                            | Aldo Morrone; Alice Massacci; Antonio Federico; Eleonora Sperandio; Fabrizio Ensoli; Francesca De Nicola; Frauke Goeman; Fulvia Fraticelli; Fulvia Pimpinelli; Gennaro Ciliberto; Giovanna D'agosto; Giovanni Blandino; Giulia Orlandi; Ilaria Cavallo; Ludovica Ciufrredda; Martina Diano; Matteo Pallocca; Maurizio Fanciulli; Sabrina Strano; Sara Donzelli; Sara Petrolo; Valentina Ricca                                                                                                                                                                                                                                                                                                                                                                                                                                                                                                                                                                                                                                                                                                                                                                                                                                                                                                                                                                                                                                                                                                                                                                                   |
| EPI_ISL_2886166                                                                                                                                                                                                                                                                                                                                                                                                                         | IVRCRD Puskesmas Cebongan                                                      | Institute for Vector and Reservoir Control, Research and Development (IVRCRD)- National Institute of Health Reseach and Development (NIHRD), Indonesia  | Aprilia Safitri; Arief Mulyono; Arif Suryo Prasetyo; Aryo Ardanto; Ayu Pradipta Pratiwi; Dimas Bagus Wicaksono Putro; Dwi Susilo; Esti Rahardianingtyas; Evi sulistyorini; Hana Aparsi Pawestri; Joko Waluyo; Kusumaningtyas Sekar Negari; Lulus Susanti; Marjianto; Mega Tyas Prihatin; Muhidin; Mujiyanto; Nur Hidayati; Restu Choirul Saban; Ristiyanto; Sidiq Setyo Nugroho; Siti Alfiah; Sri Wahyuni Handayani; Subangkit; Tika Fiona Sari; Triwibowo Ambar Garjito; Vivi Setiawaty; Wimbi Kartika Ratnasari; Yusnita Mira Anggraei                                                                                                                                                                                                                                                                                                                                                                                                                                                                                                                                                                                                                                                                                                                                                                                                                                                                                                                                                                                                                                        |
| EPI_ISL_2886160, EPI_ISL_2886161                                                                                                                                                                                                                                                                                                                                                                                                        | IVRCRD Puskesmas Muntilan 1                                                    | Institute for Vector and Reservoir Control, Research and Development (IVRCRD)- National Institute of Health Research and Development (NIHRD), Indonesia | Aprilia Safitri; Arief Mulyono; Arif Suryo Prasetyo; Aryo Ardanto; Ayu Pradipta Pratiwi; Dimas Bagus Wicaksono Putro; Dwi Susilo; Esti Rahardianingtyas; Evi sulistyorini; Hana Aparsi Pawestri; Joko Waluyo; Kusumaningtyas Sekar Negari; Lulus Susanti; Marjianto; Mega Tyas Prihatin; Muhidin; Mujiyanto; Nur Hidayati; Restu Choirul Saban; Ristiyanto; Sidiq Setyo Nugroho; Siti Alfiah; Sri Wahyuni Handayani; Subangkit; Tika Fiona Sari; Triwibowo Ambar Garjito; Vivi Setiawaty; Wimbi Kartika Ratnasari; Yusnita Mira Anggraei                                                                                                                                                                                                                                                                                                                                                                                                                                                                                                                                                                                                                                                                                                                                                                                                                                                                                                                                                                                                                                        |
| EPI_ISL_2886164                                                                                                                                                                                                                                                                                                                                                                                                                         | IVRCRD Puskesmas Welahan 1                                                     | Institute for Vector and Reservoir Control, Research and Development (IVRCRD)- National Institute of Health Reseach and Development (NIHRD), Indonesia  | Aprilia Safitri; Arief Mulyono; Arif Suryo Prasetyo; Aryo Ardanto; Ayu Pradipta Pratiwi; Dimas Bagus Wicaksono Putro; Dwi Susilo; Esti Rahardianingtyas; Evi sulistyorini; Hana Aparsi Pawestri; Joko Waluyo; Kusumaningtyas Sekar Negari; Lulus Susanti; Marjianto; Mega Tyas Prihatin; Muhidin; Mujiyanto; Nur Hidayati; Restu Choirul Saban; Ristiyanto; Sidiq Setyo Nugroho; Siti Alfiah; Sri Wahyuni Handayani; Subangkit; Tika Fiona Sari; Triwibowo Ambar Garjito; Vivi Setiawaty; Wimbi Kartika Ratnasari; Yusnita Mira Anggraei                                                                                                                                                                                                                                                                                                                                                                                                                                                                                                                                                                                                                                                                                                                                                                                                                                                                                                                                                                                                                                        |
| EPI_ISL_2886157, EPI_ISL_2886159                                                                                                                                                                                                                                                                                                                                                                                                        | IVRCRD RSPA W                                                                  | Institute for Vector and Reservoir Control, Research and Development (IVRCRD)- National Institute of Health Research and Development (NIHRD), Indonesia | Aprilia Safitri; Arief Mulyono; Arif Suryo Prasetyo; Aryo Ardanto; Ayu Pradipta Pratiwi; Dimas Bagus Wicaksono Putro; Dwi Susilo; Esti Rahardianingtyas; Evi sulistyorini; Hana Aparsi Pawestri; Joko Waluyo; Kusumaningtyas Sekar Negari; Lulus Susanti; Marjianto; Mega Tyas Prihatin; Muhidin; Mujiyanto; Nur Hidayati; Restu Choirul Saban; Ristiyanto; Sidiq Setyo Nugroho; Siti Alfiah; Sri Wahyuni Handayani; Subangkit; Tika Fiona Sari; Triwibowo Ambar Garjito; Vivi Setiawaty; Wimbi Kartika Ratnasari; Yusnita Mira Anggraei                                                                                                                                                                                                                                                                                                                                                                                                                                                                                                                                                                                                                                                                                                                                                                                                                                                                                                                                                                                                                                        |
| EPI_ISL_2812801, EPI_ISL_2812804                                                                                                                                                                                                                                                                                                                                                                                                        | Ifo Regina Elena                                                               | National Institute for Infectious Diseases (NMI) L. Spallanzani I.R.C.C.S                                                                               | A Di Caro; B Bartolini; CEM Gruber; E Giombini; F Messina; F Santini; G Bonfiglio; M Rueca; MR Capobianchi; O Butera                                                                                                                                                                                                                                                                                                                                                                                                                                                                                                                                                                                                                                                                                                                                                                                                                                                                                                                                                                                                                                                                                                                                                                                                                                                                                                                                                                                                                                                            |
| EPI_ISL_2885452                                                                                                                                                                                                                                                                                                                                                                                                                         | Illinois Department of Public Health - Springfield Lab                         | Illinois Department of Public Health - Springfield Lab                                                                                                  | Bryan Sim; Gordon McCall                                                                                                                                                                                                                                                                                                                                                                                                                                                                                                                                                                                                                                                                                                                                                                                                                                                                                                                                                                                                                                                                                                                                                                                                                                                                                                                                                                                                                                                                                                                                                        |
| EPI_ISL_2533925                                                                                                                                                                                                                                                                                                                                                                                                                         | Imágenes Diagnósticas de Mazatlán                                              | Microbial Genomics Laboratory                                                                                                                           | : Alejandra García-Gasca; Alejandra Hernández-Terán; Alejandro Sánchez-Flores; Alfredo Herrera-Estrella; Alicia Ocaña-Mondragón; Andreu Comas-García; Angel Gustavo Salas-Lais; Antonio Loza Román; Bernardo Martínez-Miguel; Blanca Taboada; Brenda Irasema Maldonado-Meza; Bruno Gómez-Gil; Carla Ivón Herrera-Najera; Carlos F. Arias; Celia Boukadida; Clara Esperanza Santacruz-Tinoco; Concepción Grajales-Muñoz; Consorcio Mexicano de Vigilancia Genómica (CoVGen-Mex). Authors (in alphabetical order): Julio Elias Alvarado-Yaah; Cristóbal Cháidez-Quiróz; Célida Duque Molina; Cécilia Martínez- Rodríguez; Daniel Frepposo-Rueda; Daniel Lira Morales; Eduardo Becerril-Vargas; Fernando Fontove-Herrera; Fidencio Mejía-Nepomuceno; Francisco Pulido; Gloria Elena Espinosa-Ayala; Gloria María Molina-Salinas; Gloria Vazquez; Hector Esteban Paz-Juárez; Helen Haydee Fernanda Ramirez-Plascencia; Irvin González-López; Jean Pierre González; Jesús Hernández; Joel Armando Vázquez-Pérez; Jorge Salas-Hernández; José Antonio Enciso-Moreno; José Arturo Martínez-Orozco; José Esteban Muñoz-Medina; José de Jesús Nuñez-Contreras; Juan Bautista Chale-Dzul; Julissa Enciso-Ibarra; Luis Alberto Ochoa-Carrera; Margarita Matías-Florentino; María Mújica-Sánchez; Marissa Perez-García; María Guadalupe de Jesús Mireles-Rivera; Nelly Sélem-Mojica; Pavel Isa; Ricardo Ciria Merce; Ricardo Grande; Rosa María Gutiérrez Rios; Santiago Ávila-Ríos; Selene Zárate; Susana Lopez; Verónica Mata-Haro; Victor Eduardo García-Arias; Victor Hugo Borja-Aburto |
| EPI_ISL_2603612,                                                                                                                                                                                                                                                                                                                                                                                                                        | IndRE                                                                          | Instituto Nacional de Medicina Genómica                                                                                                                 | Cedro-Tanda A; Margarita-Cardenas FJ; Gisela Barrera-Badillo; Gonzalez-Barrera D; Gonzalez-Woge MA; Herrera-Montalvo LA; Irma Lopez-Martinez; Jose Ernesto Ramirez González; Mendoza-Vargas A; Munguia-Garza P; Rangel-DeLeon                                                                                                                                                                                                                                                                                                                                                                                                                                                                                                                                                                                                                                                                                                                                                                                                                                                                                                                                                                                                                                                                                                                                                                                                                                                                                                                                                   |



|                                                                                                                                                                                                                                                                                                                                                                                                                                                                                                                                                                                                                                                                                                                                                                                                                                                                                                                                                                                                                                                                                                                                                                  |                                                                                          |                                                                                                                                                                                                                                |                                                                                                                                                                                                                                                                                                                                                                                                                                                                                                                                                                                                                                                                                                                                                                                                                                                                                                                                                                                                                                                                                                                                                                                                                                                                                                                                                                                                                                                                                                                                                                                               |
|------------------------------------------------------------------------------------------------------------------------------------------------------------------------------------------------------------------------------------------------------------------------------------------------------------------------------------------------------------------------------------------------------------------------------------------------------------------------------------------------------------------------------------------------------------------------------------------------------------------------------------------------------------------------------------------------------------------------------------------------------------------------------------------------------------------------------------------------------------------------------------------------------------------------------------------------------------------------------------------------------------------------------------------------------------------------------------------------------------------------------------------------------------------|------------------------------------------------------------------------------------------|--------------------------------------------------------------------------------------------------------------------------------------------------------------------------------------------------------------------------------|-----------------------------------------------------------------------------------------------------------------------------------------------------------------------------------------------------------------------------------------------------------------------------------------------------------------------------------------------------------------------------------------------------------------------------------------------------------------------------------------------------------------------------------------------------------------------------------------------------------------------------------------------------------------------------------------------------------------------------------------------------------------------------------------------------------------------------------------------------------------------------------------------------------------------------------------------------------------------------------------------------------------------------------------------------------------------------------------------------------------------------------------------------------------------------------------------------------------------------------------------------------------------------------------------------------------------------------------------------------------------------------------------------------------------------------------------------------------------------------------------------------------------------------------------------------------------------------------------|
| EPI_ISL_2603635                                                                                                                                                                                                                                                                                                                                                                                                                                                                                                                                                                                                                                                                                                                                                                                                                                                                                                                                                                                                                                                                                                                                                  |                                                                                          |                                                                                                                                                                                                                                | D; Reyes-Grajeda JP                                                                                                                                                                                                                                                                                                                                                                                                                                                                                                                                                                                                                                                                                                                                                                                                                                                                                                                                                                                                                                                                                                                                                                                                                                                                                                                                                                                                                                                                                                                                                                           |
| EPI_ISL_2570805, EPI_ISL_2570806                                                                                                                                                                                                                                                                                                                                                                                                                                                                                                                                                                                                                                                                                                                                                                                                                                                                                                                                                                                                                                                                                                                                 | Indrapura Field Hospital Surabaya                                                        | Institute of Tropical Disease, Universitas Airlangga                                                                                                                                                                           | Aldise M Nastri; Febria Rachmanita; Gatot Soegiarto; Herlin Ferliana; Jezzy R Dewantari; Kazufumi Shimizu; Krisnoadi Rahardjo; Laksmi Wulandari; Maria I Lusida; Resti Yudhawati; Rima R Prasetya; Soetjipto; Yasuko Mori                                                                                                                                                                                                                                                                                                                                                                                                                                                                                                                                                                                                                                                                                                                                                                                                                                                                                                                                                                                                                                                                                                                                                                                                                                                                                                                                                                     |
| EPI_ISL_2660359                                                                                                                                                                                                                                                                                                                                                                                                                                                                                                                                                                                                                                                                                                                                                                                                                                                                                                                                                                                                                                                                                                                                                  | Infectious Disease Program, Broad Institute of Harvard and MIT                           | Infectious Disease Program, Broad Institute of Harvard and MIT                                                                                                                                                                 | A.E.; Adams, G.; Anahtar, M.; B.L.; B.W.; Bauer, M.; Birren; Branda, J.; Carter, A.; Cerrato, F.; Chaluvasi, S.; Chapman; Cusick, C.; D.J.; DeRuff, K.; Flowers, K.; Gallagher, G.; Gladden-Young, A.; Gnirke, A.; Harris, J.; J.E.; K.J.; LaRoque, R.; Lagerborg, K.; Lemieux; Lin; Loreth, C.; MacInnis; Neumann, A.; Normandin, E.; P.C.; Park; Pierce, V.; Reilly, S.; Rosenberg, E.; Rudy, M.; Ryan, E.; S.B.; Sabeti; Shaw, B.; Siddle; Slater, D.; Smole, S.; Tomkins-Tinch, C.; Turbett, S.                                                                                                                                                                                                                                                                                                                                                                                                                                                                                                                                                                                                                                                                                                                                                                                                                                                                                                                                                                                                                                                                                           |
| EPI_ISL_2816227, EPI_ISL_2816229, EPI_ISL_2816240, EPI_ISL_2816241                                                                                                                                                                                                                                                                                                                                                                                                                                                                                                                                                                                                                                                                                                                                                                                                                                                                                                                                                                                                                                                                                               | Infectious Diseases Hospital No 2                                                        | WHO National Influenza Centre Russian Federation                                                                                                                                                                               | Andrey Komissarov; Artem Fadeev; Daria Danilenko; Dmitry Lioznov; Elena Nabieva; Georgii Bazykin; Kirill Varchenko; Ksenia Safina; Kseniya Komissarova; Maria Pisareva; Mikhail Bakaev; Nikita Yolshin; Oula Mansour; Tamila Musaeva; Veronika Eder                                                                                                                                                                                                                                                                                                                                                                                                                                                                                                                                                                                                                                                                                                                                                                                                                                                                                                                                                                                                                                                                                                                                                                                                                                                                                                                                           |
| EPI_ISL_2087219, EPI_ISL_2087232, EPI_ISL_2087519, EPI_ISL_2087703, EPI_ISL_2876082                                                                                                                                                                                                                                                                                                                                                                                                                                                                                                                                                                                                                                                                                                                                                                                                                                                                                                                                                                                                                                                                              | Infinity Biologix                                                                        | Centers for Disease Control and Prevention Division of Viral Diseases, Pathogen Discovery                                                                                                                                      | Adrian Paskey; Benjamin Rambo-Martin; Chirayu Goswami; Christian Bixby; Christopher Gulvick; Clinton R. Paden; Dakota Howard; Darlene Wagner; Dhvani Batra; Duncan MacCannell; Jason Caravas; Jonathan Schultz; Kara Moser; Matthew Schmerer; Peter W. Cook; Robin Grimwood; Russ Hager; Scott Sammons; Shatavia Morrison; Yihe Wang; Yvette Unoarumhi                                                                                                                                                                                                                                                                                                                                                                                                                                                                                                                                                                                                                                                                                                                                                                                                                                                                                                                                                                                                                                                                                                                                                                                                                                        |
| EPI_ISL_2820841, EPI_ISL_2820850, EPI_ISL_2820872, EPI_ISL_2820873                                                                                                                                                                                                                                                                                                                                                                                                                                                                                                                                                                                                                                                                                                                                                                                                                                                                                                                                                                                                                                                                                               | Innlandet Hospital Trust, Division Lillehammer, Department for Medical Microbiology      | Norwegian Institute of Public Health, Department of Virology                                                                                                                                                                   | Atiya R Ali; Debec Nadia; Engebretsen Serina Beate; Garcia Llorente Ignacio; Hilde Elshaug; Hilde Vollan; Jon Bråte; Kamilla Heddeland Instefjord; Karoline Bragstad; Kathrine Stene-Johansen; Line Victoria Moen; Marie Paulsen Madsen; Olav Hungnes; Pedersen Benedikte Nevjen; Rasmus Riis Kopperud                                                                                                                                                                                                                                                                                                                                                                                                                                                                                                                                                                                                                                                                                                                                                                                                                                                                                                                                                                                                                                                                                                                                                                                                                                                                                        |
| EPI_ISL_2466400                                                                                                                                                                                                                                                                                                                                                                                                                                                                                                                                                                                                                                                                                                                                                                                                                                                                                                                                                                                                                                                                                                                                                  | Inst. for Med. Virology, University Hospital Frankfurt, Goethe University Frankfurt      | Inst. for Med. Virology, University Hospital Frankfurt, Goethe University Frankfurt                                                                                                                                            | Goetsch, U.; Gottschalk; H.F.; Pallas, C.; R. and Ciesek, S.; Rabenau; Toptan, T.; Widera, M.; Wilhelm, A.                                                                                                                                                                                                                                                                                                                                                                                                                                                                                                                                                                                                                                                                                                                                                                                                                                                                                                                                                                                                                                                                                                                                                                                                                                                                                                                                                                                                                                                                                    |
| EPI_ISL_2110643                                                                                                                                                                                                                                                                                                                                                                                                                                                                                                                                                                                                                                                                                                                                                                                                                                                                                                                                                                                                                                                                                                                                                  | Institut Pasteur du Maroc                                                                | Functional Genomics platform/CNRST                                                                                                                                                                                             | Abdelkrim Meziane Bellefquih; Alaoui Sanaa-amine; Chouati Taha; EL FAHIME Elmostafa; Elannaz Hicham; Ennibi Khalid; Hemlali Moushine; MERABET MOUAD; Maaroufi Abderrahmane; Melloul Marouane; NOURLIL Jalal; Touil Nadia; Youbi Mohammed                                                                                                                                                                                                                                                                                                                                                                                                                                                                                                                                                                                                                                                                                                                                                                                                                                                                                                                                                                                                                                                                                                                                                                                                                                                                                                                                                      |
| EPI_ISL_2774076                                                                                                                                                                                                                                                                                                                                                                                                                                                                                                                                                                                                                                                                                                                                                                                                                                                                                                                                                                                                                                                                                                                                                  | Institute for Developing Science and Health Initiatives (ideSHI)                         | IEDCR-ideSHI-icddr,b                                                                                                                                                                                                           | Firdausi Qadri; Hassan Afrad; Manjur Hossain Khan; Sadia Rahman; Tahmina Shirin                                                                                                                                                                                                                                                                                                                                                                                                                                                                                                                                                                                                                                                                                                                                                                                                                                                                                                                                                                                                                                                                                                                                                                                                                                                                                                                                                                                                                                                                                                               |
| EPI_ISL_2758188                                                                                                                                                                                                                                                                                                                                                                                                                                                                                                                                                                                                                                                                                                                                                                                                                                                                                                                                                                                                                                                                                                                                                  | Institute for Laboratory Diagnostics and Microbiology, Klinikum Klagenfurt am Wörthersee | Bergthaler laboratory, CeMM Research Center for Molecular Medicine of the Austrian Academy of Sciences                                                                                                                         | Andreas Bergthaler; Anna Schedl; Bekir Erguner; Benedikt Agerer; Christoph Bock; Fabian Amman; Jan Laine; Lukas Endler; Maelle Le Moing; Martin Senekowitsch; Matthew Thornton; Michael Schuster; Petr Triska; Thomas Penz                                                                                                                                                                                                                                                                                                                                                                                                                                                                                                                                                                                                                                                                                                                                                                                                                                                                                                                                                                                                                                                                                                                                                                                                                                                                                                                                                                    |
| EPI_ISL_2379433, EPI_ISL_2379443, EPI_ISL_2379650, EPI_ISL_2429136, EPI_ISL_2429137, EPI_ISL_2429138, EPI_ISL_2429141, EPI_ISL_2819024, EPI_ISL_2819571, EPI_ISL_2819919                                                                                                                                                                                                                                                                                                                                                                                                                                                                                                                                                                                                                                                                                                                                                                                                                                                                                                                                                                                         | see above                                                                                | Institute for Medical Research, Infectious Disease Research Centre, National Institutes of Health, Ministry of Health Malaysia                                                                                                 | Azizan MA; Kamel K; Mohd Zawawi Z; Ramly N; Robert F; Suppliah J; Thayan R                                                                                                                                                                                                                                                                                                                                                                                                                                                                                                                                                                                                                                                                                                                                                                                                                                                                                                                                                                                                                                                                                                                                                                                                                                                                                                                                                                                                                                                                                                                    |
| EPI_ISL_2678096, EPI_ISL_2678097                                                                                                                                                                                                                                                                                                                                                                                                                                                                                                                                                                                                                                                                                                                                                                                                                                                                                                                                                                                                                                                                                                                                 | Institute for Urban Disease Control and Prevention                                       | COVID-19 Network Investigations (CONI) Alliance                                                                                                                                                                                | Amornmas Kongklieng; Angkana Huang; Anthony R. Jones; Arporn Wangwiwatsin; Bhakbhoom Panthan; Chonticha Klungtong; Duangkamon Loesbanluechai; Ekawat Pasomsub; Elizabeth Batty; Insee Sensors; Janjira Thaipadungpanit; Kamolthip Atsawaranunt; Khajohn Joonlasak; Kingkan Rakmanee; Krittikorn Kumpornsin; Namfon Kotanan; Prayuth Kaewmalang; Pukkapon Parnwijitkul; Stefan Fernandez; Thanat Chookajorn; Theerarat Kochakarn; Treewat Wathanachockchai; Vichan Pawun; Wasun Chantrattita; Wuditchai Manasatienkij                                                                                                                                                                                                                                                                                                                                                                                                                                                                                                                                                                                                                                                                                                                                                                                                                                                                                                                                                                                                                                                                          |
| EPI_ISL_2180455, EPI_ISL_2284885, EPI_ISL_2284886, EPI_ISL_2284887, EPI_ISL_2284888, EPI_ISL_2284889, EPI_ISL_2284890, EPI_ISL_2284891, EPI_ISL_2284892, EPI_ISL_2304461, EPI_ISL_2304462, EPI_ISL_2304463, EPI_ISL_2304465, EPI_ISL_2399441, EPI_ISL_2399444, EPI_ISL_2399445, EPI_ISL_2399446, EPI_ISL_2399448, EPI_ISL_2399449, EPI_ISL_2399452, EPI_ISL_2399453, EPI_ISL_2399454, EPI_ISL_2399455, EPI_ISL_2399456, EPI_ISL_2434139, EPI_ISL_2434140, EPI_ISL_2434141, EPI_ISL_2434142, EPI_ISL_2434143, EPI_ISL_2600366, EPI_ISL_2600367, EPI_ISL_2600372, EPI_ISL_2774038, EPI_ISL_2774039, EPI_ISL_2774040, EPI_ISL_2774042, EPI_ISL_2774043, EPI_ISL_2774044, EPI_ISL_2774046, EPI_ISL_2774048, EPI_ISL_2774050, EPI_ISL_2774051, EPI_ISL_2774052, EPI_ISL_2774053, EPI_ISL_2774054, EPI_ISL_2774055, EPI_ISL_2774056, EPI_ISL_2774057, EPI_ISL_2774058, EPI_ISL_2774059, EPI_ISL_2774060, EPI_ISL_2774061, EPI_ISL_2774062, EPI_ISL_2774063, EPI_ISL_2774064, EPI_ISL_2774065, EPI_ISL_2774066, EPI_ISL_2774067, EPI_ISL_2774068, EPI_ISL_2774069, EPI_ISL_2774070, EPI_ISL_2774071, EPI_ISL_2774072, EPI_ISL_2774073, EPI_ISL_2774074, EPI_ISL_2774075 | see above                                                                                | Institute of Epidemiology, Disease Control and Research (IEDCR)                                                                                                                                                                | Firdausi Qadri; Hassan Afrad; Manjur Hossain Khan; Sadia Rahman; Tahmina Shirin                                                                                                                                                                                                                                                                                                                                                                                                                                                                                                                                                                                                                                                                                                                                                                                                                                                                                                                                                                                                                                                                                                                                                                                                                                                                                                                                                                                                                                                                                                               |
| EPI_ISL_1915436, EPI_ISL_1915437, EPI_ISL_1915439, EPI_ISL_1938476, EPI_ISL_1938477                                                                                                                                                                                                                                                                                                                                                                                                                                                                                                                                                                                                                                                                                                                                                                                                                                                                                                                                                                                                                                                                              | Institute of Epidemiology, Disease Control and Research (IEDCR)                          | Institute for Developing Science and Health Initiatives (ideSHI)                                                                                                                                                               | Fidaisi Qadri; Hassan Afrad; Sadia Rahman; Tahmina Shirin                                                                                                                                                                                                                                                                                                                                                                                                                                                                                                                                                                                                                                                                                                                                                                                                                                                                                                                                                                                                                                                                                                                                                                                                                                                                                                                                                                                                                                                                                                                                     |
| EPI_ISL_2492325, EPI_ISL_2644451, EPI_ISL_2886575, EPI_ISL_2886903                                                                                                                                                                                                                                                                                                                                                                                                                                                                                                                                                                                                                                                                                                                                                                                                                                                                                                                                                                                                                                                                                               | Institute of Microbiology and Immunology, Faculty of Medicine, University of Ljubljana   | Institute of Microbiology and Immunology, Faculty of Medicine, University of Ljubljana                                                                                                                                         | Alen Suljić; Andraž Celar; Dominika Šturm; Doroteja Vlaj; Mario Poljak; Matic Brvar; Miša Korva; Patricija Pozvek; Samo Zakotnik; Tatjana Avšič – Županc; Tomaž Mark Zorec; Špela Pleh                                                                                                                                                                                                                                                                                                                                                                                                                                                                                                                                                                                                                                                                                                                                                                                                                                                                                                                                                                                                                                                                                                                                                                                                                                                                                                                                                                                                        |
| EPI_ISL_2802010, EPI_ISL_2894423, EPI_ISL_2894428, EPI_ISL_2894436, EPI_ISL_2894439, EPI_ISL_2894448, EPI_ISL_2894456, EPI_ISL_2894457, EPI_ISL_2894459, EPI_ISL_2894463, EPI_ISL_2894465, EPI_ISL_2894466, EPI_ISL_2894475, EPI_ISL_2894477, EPI_ISL_2894484, EPI_ISL_2894486                                                                                                                                                                                                                                                                                                                                                                                                                                                                                                                                                                                                                                                                                                                                                                                                                                                                                   | see above                                                                                | Institute of Virology, Biomedical Research Center of the Slovak Academy of Sciences, Bratislava                                                                                                                                | Boris Klempa; Brona Brejova; Jozef Nosek; Juraj Kopacek; Kristina Borsova; Lubomira Lukackicova; Martina Lickova; Martina Nebahacova; Monika Slavikova; Sabina Fumacova Havlikova; Tomas Vinar; Viktoria Cabanova; Viktoria Hodorova                                                                                                                                                                                                                                                                                                                                                                                                                                                                                                                                                                                                                                                                                                                                                                                                                                                                                                                                                                                                                                                                                                                                                                                                                                                                                                                                                          |
| EPI_ISL_1805024                                                                                                                                                                                                                                                                                                                                                                                                                                                                                                                                                                                                                                                                                                                                                                                                                                                                                                                                                                                                                                                                                                                                                  | Institute of Virology, Medical Center, University of Freiburg, Freiburg, Germany         | Institute of Virology, Clinal Virus Genomics, Medical Center, University of Freiburg, Freiburg, Germany                                                                                                                        | Hajo Grundmann; Jonas Fuchs; Lena Jaki; Lisa Kern; Marcus Panning; Sandra Reuter                                                                                                                                                                                                                                                                                                                                                                                                                                                                                                                                                                                                                                                                                                                                                                                                                                                                                                                                                                                                                                                                                                                                                                                                                                                                                                                                                                                                                                                                                                              |
| EPI_ISL_2777222, EPI_ISL_2777224, EPI_ISL_2777225, EPI_ISL_2777226, EPI_ISL_2777229, EPI_ISL_2777230, EPI_ISL_2777231, EPI_ISL_2777232, EPI_ISL_2777233                                                                                                                                                                                                                                                                                                                                                                                                                                                                                                                                                                                                                                                                                                                                                                                                                                                                                                                                                                                                          | see above                                                                                | Instituto Nacional de Cancerología                                                                                                                                                                                             | Alejandra Garcia-Gasca; Alejandra Hernández-Terán; Alejandro Sanchez-Flores; Alfredo Herrera-Estrella; Alicia Ocaña-Mondragón; Andreu Comas-García; Angel Gustavo Salas-Lais; Antonio Loza Román; Bernardo Martínez-Miguel; Blanca Taboada; Brenda Irasema Maldonado-Meza; Bruno Gomez-Gil; Carla Ivón Herrera-Najera; Carlos F. Arias; Celia Boukadida; Clara Esperanza Santacruz-Tinoco; Concepción Grajales-Muñiz; Consorcio Mexicano de Vigilancia Genómica (CoViGen-Mex). Authors (in alphabetical order): Julio Elias Alvarado-Yaah; Cristóbal Cháidez-Quiróz; Célida Duque Molina; Célida Martínez- Rodríguez; Daniel Fregoso-Rueda; Daniel Lira Morales; Eduardo Becerril-Vargas; Fernando Fontove-Herrera; Fidencio Mejía-Nepomuceno; Francisco Pulido; Gloria Elena Espinosa-Ayala; Gloria María Molina-Salinas; Gloria Vazquez; Hector Esteban Paz-Juárez; Hector Montoya-Fuentes; Helen Haydee Fernanda Ramirez-Plascencia; Irvin González-López; Jean Pierre González; Joel Armando Vázquez-Pérez.; Jorge Salas-Hernández; José Antonio Enciso-Moreno; José Arturo Martínez-Orozco; José Esteban Muñoz-Medina; José de Jesús Nuñez-Contreras; Juan Bautista Chale-Dzul; Julissa Enciso-Ibarra; Kathia Elizabeth Tapia-Díaz; Luis Alberto Ochoa-Carrera; Margarita Matías-Florentino; Mario Mújica-Sánchez; Marissa Pérez-García; María Guadalupe de Jesús Mireles-Rivera; Nelly Sélem-Mojica; Pavel Isa; Ricardo Ciria Merce; Ricardo Grande; Rosa María Gutierrez Rios; Santiago Ávila-Ríos; Selene Zárate; Susana Lopez; Víctor Eduardo García-Arias; Víctor Hugo Borja-Aburto |
| EPI_ISL_2777214, EPI_ISL_2777216                                                                                                                                                                                                                                                                                                                                                                                                                                                                                                                                                                                                                                                                                                                                                                                                                                                                                                                                                                                                                                                                                                                                 | Instituto Nacional de Enfermedades Respiratorias (INER)                                  | Centro de Investigación en Enfermedades Infecciosas (CIENI), Instituto Nacional de Enfermedades Respiratorias (INER)                                                                                                           | Alejandra Garcia-Gasca; Alejandra Hernández-Terán; Alejandro Sanchez-Flores; Alfredo Herrera-Estrella; Alicia Ocaña-Mondragón; Andreu Comas-García; Angel Gustavo Salas-Lais; Antonio Loza Román; Bernardo Martínez-Miguel; Blanca Taboada; Brenda Irasema Maldonado-Meza; Bruno Gomez-Gil; Carla Ivón Herrera-Najera; Carlos F. Arias; Celia Boukadida; Clara Esperanza Santacruz-Tinoco; Concepción Grajales-Muñiz; Consorcio Mexicano de Vigilancia Genómica (CoViGen-Mex). Authors (in alphabetical order): Julio Elias Alvarado-Yaah; Cristóbal Cháidez-Quiróz; Célida Duque Molina; Célida Martínez- Rodríguez; Daniel Fregoso-Rueda; Daniel Lira Morales; Eduardo Becerril-Vargas; Fernando Fontove-Herrera; Fidencio Mejía-Nepomuceno; Francisco Pulido; Gloria Elena Espinosa-Ayala; Gloria María Molina-Salinas; Gloria Vazquez; Hector Esteban Paz-Juárez; Hector Montoya-Fuentes; Helen Haydee Fernanda Ramirez-Plascencia; Irvin González-López; Jean Pierre González; Joel Armando Vázquez-Pérez.; Jorge Salas-Hernández; José Antonio Enciso-Moreno; José Arturo Martínez-Orozco; José Esteban Muñoz-Medina; José de Jesús Nuñez-Contreras; Juan Bautista Chale-Dzul; Julissa Enciso-Ibarra; Kathia Elizabeth Tapia-Díaz; Luis Alberto Ochoa-Carrera; Margarita Matías-Florentino; Mario Mújica-Sánchez; Marissa Pérez-García; María Guadalupe de Jesús Mireles-Rivera; Nelly Sélem-Mojica; Pavel Isa; Ricardo Ciria Merce; Ricardo Grande; Rosa María Gutierrez Rios; Santiago Ávila-Ríos; Selene Zárate; Susana Lopez; Víctor Eduardo García-Arias; Víctor Hugo Borja-Aburto |
| EPI_ISL_2617181, EPI_ISL_2617182, EPI_ISL_2841652, EPI_ISL_2841653, EPI_ISL_2841654                                                                                                                                                                                                                                                                                                                                                                                                                                                                                                                                                                                                                                                                                                                                                                                                                                                                                                                                                                                                                                                                              | Instituto Nacional de Investigación em Saúde                                             | CERI, Centre for Epidemic Response and Innovation, Stellenbosch University and KRISP, KZN Research Innovation and Sequencing Platform, UKZN.                                                                                   | Afonso P; David K; Emmanuel SJ; Freitas RH; Giandhari J; Inglês L; Lutucuta S; Miranda J; Morais J; Mufinda M; Naidoo Y; Neto Z; Paulo A Carralero RR Paixão JP; Pereira A; Pillay S; Tegally H; Wilkinson E; de Oliveira T                                                                                                                                                                                                                                                                                                                                                                                                                                                                                                                                                                                                                                                                                                                                                                                                                                                                                                                                                                                                                                                                                                                                                                                                                                                                                                                                                                   |
| EPI_ISL_2778017                                                                                                                                                                                                                                                                                                                                                                                                                                                                                                                                                                                                                                                                                                                                                                                                                                                                                                                                                                                                                                                                                                                                                  | Instituto Nacional de Medicina Genomica                                                  | Centro de Investigación en Enfermedades Infecciosas (CIENI), Instituto Nacional de Enfermedades Respiratorias (INER)                                                                                                           | Ávila-Ríos S; Boukadida C; Cedro-Tanda A; Herrera-Montalvo LA; Hidalgo-Miranda A; Matias-Florentino M; Mendoza-Vargas A; Perez-Garcia M; Reyes-Grajeda JP; Reyes-Teran G                                                                                                                                                                                                                                                                                                                                                                                                                                                                                                                                                                                                                                                                                                                                                                                                                                                                                                                                                                                                                                                                                                                                                                                                                                                                                                                                                                                                                      |
| EPI_ISL_2692836, EPI_ISL_2692840, EPI_ISL_2692845, EPI_ISL_2894251, EPI_ISL_2894252, EPI_ISL_2894256, EPI_ISL_2894257, EPI_ISL_2894258, EPI_ISL_2894260, EPI_ISL_2894262, EPI_ISL_2894263, EPI_ISL_2894270, EPI_ISL_2894276, EPI_ISL_2894277, EPI_ISL_2894281, EPI_ISL_2894283, EPI_ISL_2894288, EPI_ISL_2894289, EPI_ISL_2894308, EPI_ISL_2894310, EPI_ISL_2894317, EPI_ISL_2894318, EPI_ISL_2894328, EPI_ISL_2894401                                                                                                                                                                                                                                                                                                                                                                                                                                                                                                                                                                                                                                                                                                                                           | see above                                                                                | Instituto Nacional de Medicina Genomica                                                                                                                                                                                        | Abraham Campos-Romero; Cedro-Tanda A; Cisneros- Villanueva M; Escobar-Arrazola; Gonzalez-Barrera D; Herrera-Montalvo LA.; Hidalgo-Miranda A.; Luna-Ruiz Marco; M; Mendoza-Vargas A; Moreno-Camacho José Luis; Munguia-Garza P; Ramirez-Vega O; Rangel-DeLeon D; Reyes-Grajeda JP; Rodriguez-Gallegos Jorge                                                                                                                                                                                                                                                                                                                                                                                                                                                                                                                                                                                                                                                                                                                                                                                                                                                                                                                                                                                                                                                                                                                                                                                                                                                                                    |
| EPI_ISL_2340461                                                                                                                                                                                                                                                                                                                                                                                                                                                                                                                                                                                                                                                                                                                                                                                                                                                                                                                                                                                                                                                                                                                                                  | Instituto Nacional de Saude (INSA)                                                       | Instituto Nacional de Saude (INSA) and BioSystems & Integrative Sciences Institute (BioSI) Genomics Unit, FCUL                                                                                                                 | Borges et al                                                                                                                                                                                                                                                                                                                                                                                                                                                                                                                                                                                                                                                                                                                                                                                                                                                                                                                                                                                                                                                                                                                                                                                                                                                                                                                                                                                                                                                                                                                                                                                  |
| EPI_ISL_2290665, EPI_ISL_2290666                                                                                                                                                                                                                                                                                                                                                                                                                                                                                                                                                                                                                                                                                                                                                                                                                                                                                                                                                                                                                                                                                                                                 | Invicta                                                                                  | 1. National Institute of Public Health - National Institute of Hygiene, Warsaw, Poland 2. Biobank Lab, University of Lodz 3. Laboratory of Respiratory Viruses, Teaching and Clinical Center of the Medical University of Lodz | Dominik Strapagiel; Izabela Dróżdż; Jakub Lach; Katarzyna Zacharczuk; Klaudyna Królikowska; Maciej Borowiec; Magdalena Nowakowska; Magdalena Traczyk-Borszyńska; Marcin Słomka; Marta Sobalska-Kwapis; Małgorzata Sadkowska-Todys; Tomasz Płoszaj; Tomasz Wolkowicz                                                                                                                                                                                                                                                                                                                                                                                                                                                                                                                                                                                                                                                                                                                                                                                                                                                                                                                                                                                                                                                                                                                                                                                                                                                                                                                           |
| EPI_ISL_2815329, EPI_ISL_2815330                                                                                                                                                                                                                                                                                                                                                                                                                                                                                                                                                                                                                                                                                                                                                                                                                                                                                                                                                                                                                                                                                                                                 | Ipoh Public Health Laboratory (MKAi), Ministry of Health Malaysia                        | Institute for Medical Research, Infectious Disease Research Centre, National Institutes of Health, Ministry of Health Malaysia                                                                                                 | Azizan MA; Kamel K; Mohd Zawawi Z; Ramly N; Robert F; Suppliah J; Thayan R                                                                                                                                                                                                                                                                                                                                                                                                                                                                                                                                                                                                                                                                                                                                                                                                                                                                                                                                                                                                                                                                                                                                                                                                                                                                                                                                                                                                                                                                                                                    |
| EPI_ISL_2645119                                                                                                                                                                                                                                                                                                                                                                                                                                                                                                                                                                                                                                                                                                                                                                                                                                                                                                                                                                                                                                                                                                                                                  | Islab, Pohjois-Savon aluelaboratorio                                                     | Expert Microbiology, National Institute for Health and Welfare                                                                                                                                                                 | Carita Savolainen-Kopra; Erika Lindh; Haider al-Hello; Jani Halkilahti; Kirsi Liitsola; Niina Ikonen; Olli Vapalahti; Pekka Ellonen; Phuoc Truong; Päivi Laurila; Ravi Kant; Sari Hannula; Soile Blomqvist; Teemu Smura                                                                                                                                                                                                                                                                                                                                                                                                                                                                                                                                                                                                                                                                                                                                                                                                                                                                                                                                                                                                                                                                                                                                                                                                                                                                                                                                                                       |
| EPI_ISL_2183026, EPI_ISL_2183029, EPI_ISL_2183057, EPI_ISL_2183059, EPI_ISL_2183060, EPI_ISL_2183112, EPI_ISL_2183114, EPI_ISL_2183116, EPI_ISL_2183420, EPI_ISL_2183422, EPI_ISL_2183424, EPI_ISL_2183427, EPI_ISL_2183431, EPI_ISL_2183613, EPI_ISL_2183691, EPI_ISL_2183692, EPI_ISL_2183694, EPI_ISL_2183702, EPI_ISL_2183704, EPI_ISL_2183721, EPI_ISL_2183727, EPI_ISL_2183749, EPI_ISL_2183779, EPI_ISL_2183805, EPI_ISL_2636189, EPI_ISL_2636241, EPI_ISL_2636298, EPI_ISL_2636326, EPI_ISL_2636333, EPI_ISL_2636354, EPI_ISL_2636356, EPI_ISL_2636358, EPI_ISL_2636361, EPI_ISL_2636363, EPI_ISL_2636365, EPI_ISL_2636367, EPI_ISL_2636371, EPI_ISL_2636373, EPI_ISL_2636377, EPI_ISL_2636385, EPI_ISL_2636387, EPI_ISL_2636396, EPI_ISL_2636399                                                                                                                                                                                                                                                                                                                                                                                                        | see above                                                                                | Israel National Consortium for SARS-CoV-2 sequencing                                                                                                                                                                           | Dana Bar-Ilan; Efrat Dahan Bucris; Efrat Glick-Saar; Ella Mendelson; Gideon Rechavi; Michal Mandelboim; Miranda Geva; Neta Zuckerman; Netanel Abu; Omri Nayschool; Oran Erster; Orna Mor                                                                                                                                                                                                                                                                                                                                                                                                                                                                                                                                                                                                                                                                                                                                                                                                                                                                                                                                                                                                                                                                                                                                                                                                                                                                                                                                                                                                      |
| EPI_ISL_2844483                                                                                                                                                                                                                                                                                                                                                                                                                                                                                                                                                                                                                                                                                                                                                                                                                                                                                                                                                                                                                                                                                                                                                  | Istituto Zooprofilattico Sperimentale del Mezzogiorno                                    | TIGEM                                                                                                                                                                                                                          | Antonio Grimaldi Patrizia Annunziata Francesco Panariello Biancamaria Pierri Claudia Tiberio Teresa Giuliano Valentina Bouche Chiara Colantuono Maria Concetta Cuomo Denise Di Concilio Lucio Di Filippo Anna Manfredi Marcello Salvi Antonio Limone Luigi Atripaldi Pellegrino Cerino Andrea Ballabio Davide Cacciarielli                                                                                                                                                                                                                                                                                                                                                                                                                                                                                                                                                                                                                                                                                                                                                                                                                                                                                                                                                                                                                                                                                                                                                                                                                                                                    |
| EPI_ISL_2641798,                                                                                                                                                                                                                                                                                                                                                                                                                                                                                                                                                                                                                                                                                                                                                                                                                                                                                                                                                                                                                                                                                                                                                 | Istituto Zooprofilattico Sperimentale del Mezzogiorno                                    | Teleton Institute of Genetics and Medicine (TIGEM)                                                                                                                                                                             | Antonio Grimaldi Patrizia Annunziata Francesco Panariello Biancamaria Pierri Claudia Tiberio Teresa Giuliano Valentina Bouche Chiara Colantuono Maria Concetta Cuomo Denise Di Concilio Lucio Di Filippo Anna Manfredi Marcello Salvi Antonio Limone                                                                                                                                                                                                                                                                                                                                                                                                                                                                                                                                                                                                                                                                                                                                                                                                                                                                                                                                                                                                                                                                                                                                                                                                                                                                                                                                          |

|                                                                                                                                                                                                                                                                                                                                                                                                                                                                                                                                                                                                                                                                                                                                                                             |                                                                                                             |                                                                                                                                                                                                                                                                                                       |                                                                                                                                                                                                                                                                                                                                                                                                                                                                                                                                                          |                                                                                                                                                                                                                                                                                                                |
|-----------------------------------------------------------------------------------------------------------------------------------------------------------------------------------------------------------------------------------------------------------------------------------------------------------------------------------------------------------------------------------------------------------------------------------------------------------------------------------------------------------------------------------------------------------------------------------------------------------------------------------------------------------------------------------------------------------------------------------------------------------------------------|-------------------------------------------------------------------------------------------------------------|-------------------------------------------------------------------------------------------------------------------------------------------------------------------------------------------------------------------------------------------------------------------------------------------------------|----------------------------------------------------------------------------------------------------------------------------------------------------------------------------------------------------------------------------------------------------------------------------------------------------------------------------------------------------------------------------------------------------------------------------------------------------------------------------------------------------------------------------------------------------------|----------------------------------------------------------------------------------------------------------------------------------------------------------------------------------------------------------------------------------------------------------------------------------------------------------------|
| EPI_ISL_2641928, EPI_ISL_2641992, EPI_ISL_2641993                                                                                                                                                                                                                                                                                                                                                                                                                                                                                                                                                                                                                                                                                                                           |                                                                                                             |                                                                                                                                                                                                                                                                                                       | Luigi Atripaldi Pellegrino Cerino Andrea Ballabio Davide Cacchiarelli                                                                                                                                                                                                                                                                                                                                                                                                                                                                                    |                                                                                                                                                                                                                                                                                                                |
| EPI_ISL_2725330                                                                                                                                                                                                                                                                                                                                                                                                                                                                                                                                                                                                                                                                                                                                                             | Istituto Zooprofilattico Sperimentale del Mezzogiorno - Azienda Ospedaliera "Pugliese Ciaccio" di Catanzaro | Telethon Institute of Genetics and Medicine (TIGEM)                                                                                                                                                                                                                                                   | Antonio Grimaldi Patrizia Annunziata Francesco Panariello Biancamaria Pierri Claudia Tiberio Teresa Giuliano Valentina Bouche Chiara Colantuono Maria Concetta Cuomo Denise Di Concilio Lucio Di Filippo Anna Manfredi Pasquale Minchella Marcello Salvi Antonio Limone Luigi Atripaldi Pellegrino Cerino Andrea Ballabio Davide Cacchiarelli                                                                                                                                                                                                            |                                                                                                                                                                                                                                                                                                                |
| EPI_ISL_2171266                                                                                                                                                                                                                                                                                                                                                                                                                                                                                                                                                                                                                                                                                                                                                             | Janamaitri Hospital                                                                                         | Molecular and Genomics Research Lab, Dhulikhel Hospital, Kathmandu University Hospital                                                                                                                                                                                                                | Dipesh Tamrakar; Meghnath Dhimal; Navin Adhikari; Nishan Katuwal; Pradip Gyanwali; Rajeev Shrestha; Saroj Bhattarai; Surendra Kumar Madhup                                                                                                                                                                                                                                                                                                                                                                                                               |                                                                                                                                                                                                                                                                                                                |
| EPI_ISL_1753676, EPI_ISL_1922480, EPI_ISL_2422370                                                                                                                                                                                                                                                                                                                                                                                                                                                                                                                                                                                                                                                                                                                           | Jessa                                                                                                       | Jessa                                                                                                                                                                                                                                                                                                 | Berden et al. on behalf of the Jessa_cmdLab; Cruys et al. on behalf of the Jessa_cmdLab                                                                                                                                                                                                                                                                                                                                                                                                                                                                  |                                                                                                                                                                                                                                                                                                                |
| EPI_ISL_2248930                                                                                                                                                                                                                                                                                                                                                                                                                                                                                                                                                                                                                                                                                                                                                             | Joaquim Chaves Saude                                                                                        | Instituto Nacional de Saude (INSA)                                                                                                                                                                                                                                                                    | Borges et al                                                                                                                                                                                                                                                                                                                                                                                                                                                                                                                                             |                                                                                                                                                                                                                                                                                                                |
| EPI_ISL_2550714, EPI_ISL_2550731                                                                                                                                                                                                                                                                                                                                                                                                                                                                                                                                                                                                                                                                                                                                            | Johor Bahru Public Health Laboratory                                                                        | Institute for Medical Research, Infectious Disease Research Centre, National Institutes of Health, Ministry of Health Malaysia                                                                                                                                                                        | Azizan MA; Kamel K; Mohd Zawawi Z; Ramly N; Robert F; Suppliah J; Thayan R                                                                                                                                                                                                                                                                                                                                                                                                                                                                               |                                                                                                                                                                                                                                                                                                                |
| EPI_ISL_2603038, EPI_ISL_2603039, EPI_ISL_2603040, EPI_ISL_2603051                                                                                                                                                                                                                                                                                                                                                                                                                                                                                                                                                                                                                                                                                                          | KEMRI-Wellcome Trust Research Programme,Kilifi                                                              | KEMRI-Wellcome Trust Research Programme,Kilifi                                                                                                                                                                                                                                                        | ; Githinji G.; Matoke D.; Mburu M.W.; Mohamed K.S.; Onyango C.; de Laurent Z.                                                                                                                                                                                                                                                                                                                                                                                                                                                                            |                                                                                                                                                                                                                                                                                                                |
| EPI_ISL_2425254, EPI_ISL_2425255, EPI_ISL_2425256, EPI_ISL_2425257, EPI_ISL_2425258, EPI_ISL_2425316, EPI_ISL_2425317, EPI_ISL_2425318, EPI_ISL_2425319, EPI_ISL_2425320, EPI_ISL_2425321, EPI_ISL_2425322, EPI_ISL_2726311, EPI_ISL_2726502, EPI_ISL_2726503, EPI_ISL_2726504, EPI_ISL_2726516, EPI_ISL_2726520, EPI_ISL_2726522, EPI_ISL_2832259, EPI_ISL_2832634, EPI_ISL_2833228, EPI_ISL_2833229, EPI_ISL_2833350, EPI_ISL_2833355, EPI_ISL_2833431, EPI_ISL_2834778, EPI_ISL_2864474, EPI_ISL_2864485, EPI_ISL_2864489, EPI_ISL_2864691, EPI_ISL_2864762, EPI_ISL_2877534, EPI_ISL_2878165, EPI_ISL_2878182, EPI_ISL_2878185, EPI_ISL_2886256, EPI_ISL_2886360, EPI_ISL_2886382                                                                                       | KU Leuven, Rega Institute, Clinical and Epidemiological Virology                                            | KU Leuven, Rega Institute, Clinical and Epidemiological Virology                                                                                                                                                                                                                                      | Bert Vanmechelen; Joan Marti-Carerras; Piet Maes; Tony Wawina-Bokalanga                                                                                                                                                                                                                                                                                                                                                                                                                                                                                  |                                                                                                                                                                                                                                                                                                                |
| EPI_ISL_2608421                                                                                                                                                                                                                                                                                                                                                                                                                                                                                                                                                                                                                                                                                                                                                             | Kampong Cham Rapid Response Team                                                                            | Virology Unit, Institut Pasteur du Cambodge                                                                                                                                                                                                                                                           | Cecile Troupin; Chau Darapeak; Chin Savuth; Erik A Karlsson; Jurre Y Siegers; Kraing Sidonn; Leakhena Pum; Ly Sovann; Veasna Duong; Yi Sengdoeurn                                                                                                                                                                                                                                                                                                                                                                                                        |                                                                                                                                                                                                                                                                                                                |
| EPI_ISL_2608444                                                                                                                                                                                                                                                                                                                                                                                                                                                                                                                                                                                                                                                                                                                                                             | Kampot Rapid Response Team                                                                                  | Virology Unit, Institut Pasteur du Cambodge                                                                                                                                                                                                                                                           | Cecile Troupin; Chau Darapeak; Chin Savuth; Erik A Karlsson; Jurre Y Siegers; Kraing Sidonn; Leakhena Pum; Ly Sovann; Veasna Duong; Yi Sengdoeurn                                                                                                                                                                                                                                                                                                                                                                                                        |                                                                                                                                                                                                                                                                                                                |
| EPI_ISL_2544687, EPI_ISL_2544688                                                                                                                                                                                                                                                                                                                                                                                                                                                                                                                                                                                                                                                                                                                                            | Kanagawa Prefectural Institute of Public Health                                                             | Kanagawa Prefectural Institute of Public Health                                                                                                                                                                                                                                                       | Itsumi Toyokura; Junichi Sakuragi; Kentaro Itokawa; Makiko Kondo; Makoto Kuroda; Masanori Hashino; Rieko Suzuki; Rina Tanaka; Sumi Watanabe; Takako Sano; Takayuki Hishiki; Tomohiko Takasaki; Tsuyoshi Sekizuka                                                                                                                                                                                                                                                                                                                                         |                                                                                                                                                                                                                                                                                                                |
| EPI_ISL_2893690, EPI_ISL_2894546                                                                                                                                                                                                                                                                                                                                                                                                                                                                                                                                                                                                                                                                                                                                            | Kansas Health and Environmental Lab                                                                         | Kansas Health and Environmental Lab                                                                                                                                                                                                                                                                   | Ben Olsen; Jonathan Barnell; Katherine Wiggins; Mike Grose; and Phil Adam                                                                                                                                                                                                                                                                                                                                                                                                                                                                                |                                                                                                                                                                                                                                                                                                                |
| EPI_ISL_1791065, EPI_ISL_1791066                                                                                                                                                                                                                                                                                                                                                                                                                                                                                                                                                                                                                                                                                                                                            | Kantonsspital Baden AG                                                                                      | Institute of Medical Virology, University of Zurich                                                                                                                                                                                                                                                   | Alexandra Trkola; Annette Audigé; Cyril Shah; Gabriela Ziltener; Guido Bloemberg; Jon Huder; Jürg Böni; Kevin Steiner; Maria Grünberg; Maryam Zaheri; Michael Huber; Riccarda Capaul; Stefan Schmutz; Verena Kufner                                                                                                                                                                                                                                                                                                                                      |                                                                                                                                                                                                                                                                                                                |
| EPI_ISL_2854783, EPI_ISL_2854784, EPI_ISL_2854796                                                                                                                                                                                                                                                                                                                                                                                                                                                                                                                                                                                                                                                                                                                           | Kantor Kesehatan Pelabuhan Kelas I Medan                                                                    | National Institute of Health Research and Development                                                                                                                                                                                                                                                 | Arie Ardiansyah Nugraha; Hana Aparsi Pawestri; Hartanti Dian Ikawati; Kartika Dewi Puspa; Krisna Pangesti; Nelly Puspandari; Subangkit; Triyani Soekarso; Vivi Setiawaty                                                                                                                                                                                                                                                                                                                                                                                 |                                                                                                                                                                                                                                                                                                                |
| EPI_ISL_2233091, EPI_ISL_2233092, EPI_ISL_2233093, EPI_ISL_2233096, EPI_ISL_2233097, EPI_ISL_2233098, EPI_ISL_2233099, EPI_ISL_2233100, EPI_ISL_2233101, EPI_ISL_2233102, EPI_ISL_2233103, EPI_ISL_2233104, EPI_ISL_2233105                                                                                                                                                                                                                                                                                                                                                                                                                                                                                                                                                 | see above                                                                                                   | Kantor Kesehatan Pelabuhan Kelas II Cilacap                                                                                                                                                                                                                                                           | Arie Ardiansyah Nugraha; Hana Aparsi Pawestri; Hartanti Dian Ikawati; Kartika Dewi Puspa; Krisna Pangesti; Nelly Puspandari; Subangkit; Triyani Soekarso; Vivi Setiawaty                                                                                                                                                                                                                                                                                                                                                                                 |                                                                                                                                                                                                                                                                                                                |
| EPI_ISL_2854757, EPI_ISL_2854758, EPI_ISL_2854759                                                                                                                                                                                                                                                                                                                                                                                                                                                                                                                                                                                                                                                                                                                           | Kantor Kesehatan Pelabuhan Kelas III Bengkulu                                                               | National Institute of Health Research and Development                                                                                                                                                                                                                                                 | Arie Ardiansyah Nugraha; Hana Aparsi Pawestri; Hartanti Dian Ikawati; Kartika Dewi Puspa; Krisna Pangesti; Nelly Puspandari; Subangkit; Triyani Soekarso; Vivi Setiawaty                                                                                                                                                                                                                                                                                                                                                                                 |                                                                                                                                                                                                                                                                                                                |
| EPI_ISL_2832805, EPI_ISL_2840080                                                                                                                                                                                                                                                                                                                                                                                                                                                                                                                                                                                                                                                                                                                                            | Karolinska University Hospital Solna                                                                        | Karolinska University Hospital                                                                                                                                                                                                                                                                        | Annelie Bjerkner; Isak Sylvin; Jan Albert; Karolina Ininbergs; Lina Guerra Blomqvist; Lynda Eneh; Martin Ekman; Martina Wahlund; Robert Dyrdak; Sandra Brodsson; Tanja Normark; Tobias Allander; Valterti Wirta; Zhibing Yun                                                                                                                                                                                                                                                                                                                             |                                                                                                                                                                                                                                                                                                                |
| EPI_ISL_2648221, EPI_ISL_2648223, EPI_ISL_2648224, EPI_ISL_2648226, EPI_ISL_2648235, EPI_ISL_2648236, EPI_ISL_2648237, EPI_ISL_2820296, EPI_ISL_2820300, EPI_ISL_2820303, EPI_ISL_2820304, EPI_ISL_2820307, EPI_ISL_2820308, EPI_ISL_2820312, EPI_ISL_2820321, EPI_ISL_2820322, EPI_ISL_2820325, EPI_ISL_2820326, EPI_ISL_2820330, EPI_ISL_2820331, EPI_ISL_2820333, EPI_ISL_2820386, EPI_ISL_2820392, EPI_ISL_2820400                                                                                                                                                                                                                                                                                                                                                      | see above                                                                                                   | Kasane Primary Hospital Laboratory                                                                                                                                                                                                                                                                    | Botswana Harvard HIV Reference Laboratory                                                                                                                                                                                                                                                                                                                                                                                                                                                                                                                | Agnes Karutwaeng; Boitumelo Zuze; Botshelo Radibe; Dorcas Maruapula; Joseph Makhema; Keoratile Ntshambiwa; Legodile Kooepile; Madisa Mine; Mosepele Mosepele; Ontlametse T. Bareng; Roger Shapiro; Rose Munyere; Shahin Lockman; Sikhulile Moyo; Simani Gaseitsiwe; Thongbotho Mphoyakgosi; Wonderful T. Choga |
| EPI_ISL_2433313, EPI_ISL_2433572, EPI_ISL_2433573, EPI_ISL_2433574, EPI_ISL_2433575, EPI_ISL_2433576, EPI_ISL_2433577, EPI_ISL_2433578, EPI_ISL_2433579, EPI_ISL_2433580, EPI_ISL_2433581, EPI_ISL_2433582, EPI_ISL_2433583, EPI_ISL_2433584, EPI_ISL_2433585, EPI_ISL_2433586, EPI_ISL_2433587, EPI_ISL_2433588, EPI_ISL_2433589, EPI_ISL_2433590, EPI_ISL_2433591, EPI_ISL_2433592, EPI_ISL_2433593, EPI_ISL_2433594, EPI_ISL_2433595, EPI_ISL_2433596, EPI_ISL_2433597, EPI_ISL_2433598, EPI_ISL_2433599, EPI_ISL_2433600, EPI_ISL_2433601, EPI_ISL_2433602, EPI_ISL_2433603, EPI_ISL_2433604, EPI_ISL_2433605, EPI_ISL_2433606, EPI_ISL_2433607, EPI_ISL_2433608, EPI_ISL_2433609, EPI_ISL_2433610, EPI_ISL_2433611, EPI_ISL_2433612, EPI_ISL_2433613, EPI_ISL_2433614, | see above                                                                                                   | Kasemrad international hospital                                                                                                                                                                                                                                                                       | Division of Genomic Medicine and Innovation support,Department of Medical Sciences, Ministry of Public Health, Thailand                                                                                                                                                                                                                                                                                                                                                                                                                                  | Archawin Rojanawiat; Jirapha Pakdee; Natthakul Bunneang; Nuanjun Wichukchinda; Penpittha Thawong; Pilailuk Akkapaiboon Okada; Pundharika Piboonsiri; Surakameth Mahasirimongkol; Waritta Sawaengdee                                                                                                            |
| EPI_ISL_2840605                                                                                                                                                                                                                                                                                                                                                                                                                                                                                                                                                                                                                                                                                                                                                             | Kasemrad international hospital ratthanatibeth                                                              | National Institute of Health, Department of Medical Sciences, Ministry of Public Health, Thailand                                                                                                                                                                                                     | ; Natchaya Khidsang; Nuttida Thongpramul; Pakorn Promtong; Pilailuk Okada; Ratana Tacharoenmuang; Siripaporn Phuyugun; Sittiporn Parmnen; Sunthareeya Waicharoen; Thanutsapa Thanadachakul; Warawan Wongboot; sirikanda wimol                                                                                                                                                                                                                                                                                                                            |                                                                                                                                                                                                                                                                                                                |
| EPI_ISL_2693549<br>EPI_ISL_2758190                                                                                                                                                                                                                                                                                                                                                                                                                                                                                                                                                                                                                                                                                                                                          | Klinika za infektivne bolesti "Dr. Fran Mihaljević"<br>Klinikum Wels-Grieskirchen                           | Hrvatski zavod za javno zdravstvo<br>Bergthaler laboratory, CeMM Research Center for Molecular Medicine of the Austrian Academy of Sciences                                                                                                                                                           | Irena Tabain; Ivana Ferenčak<br>Andreas Bergthaler; Anna Schedl; Bekir Erguner; Benedikt Agerer; Christoph Bock; Fabian Amman; Jan Laine; Lukas Endler; Maelle Le Moing; Martin Senekowitsch; Matthew Thornton; Michael Schuster; Petr Triska; Thomas Penz                                                                                                                                                                                                                                                                                               |                                                                                                                                                                                                                                                                                                                |
| EPI_ISL_2397179, EPI_ISL_2397200<br>EPI_ISL_2815331                                                                                                                                                                                                                                                                                                                                                                                                                                                                                                                                                                                                                                                                                                                         | Klinisch Laboratorium ZNA<br>Kuala Lumpur General Hospital                                                  | Klinisch Laboratorium ZNA                                                                                                                                                                                                                                                                             | Verstrepen et al.                                                                                                                                                                                                                                                                                                                                                                                                                                                                                                                                        |                                                                                                                                                                                                                                                                                                                |
| EPI_ISL_2854187                                                                                                                                                                                                                                                                                                                                                                                                                                                                                                                                                                                                                                                                                                                                                             | Kuala Terengganu District Health Office                                                                     | Institute for Medical Research, Infectious Disease Research Centre, National Institutes of Health, Ministry of Health Malaysia                                                                                                                                                                        | Azizan MA; Kamel K; Mohd Zawawi Z; Ramly N; Robert F; Suppliah J; Thayan R                                                                                                                                                                                                                                                                                                                                                                                                                                                                               |                                                                                                                                                                                                                                                                                                                |
| EPI_ISL_1941773<br>EPI_ISL_2854729<br>EPI_ISL_2629561<br>EPI_ISL_2228675                                                                                                                                                                                                                                                                                                                                                                                                                                                                                                                                                                                                                                                                                                    | LA SOURCE<br>LAB RS Mitra Kemayoran<br>LABM DU PRE - LABOMAINE<br>LABM Unilabs EYLAU Corbeil                | Laboratory of genomics and metagenomics<br>National Institute of Health Research and Development<br>CNR Virus des Infections Respiratoires - France SUD<br>Department of Virology, Henri Mondor University Hospital, Assistance Publique Hôpitaux de Paris, Université Paris-Est Créteil, INSERM U955 | Claire Bertelli; Damien Jacot; Gilbert Greub; Sebastien Aeby; Trestan Pilonel<br>; Arie Ardiansyah Nugraha; Hana Aparsi Pawestri; Hartanti Dian Ikawati; Kartika Dewi Puspa; Krisna Pangesti; Nelly Puspandari; Subangkit; Triyani Soekarso; Vivi Setiawaty<br>Antonin Bal; Bruno Lina; Gregory Destras; Gwendolyne Burfin; Hadrien Regue; Laurence Josset; Martine Valette; Quentin Semanas<br>Alexandre Soulier; Christophe Rodriguez; Elisabeth Trawinski; Guillaume Gricourt; Jean-Michel Pawlotsky; Melissa N'Debi; Slim Fourati; Vanessa Demontant |                                                                                                                                                                                                                                                                                                                |
| EPI_ISL_2629445<br>EPI_ISL_2567490, EPI_ISL_2567491, EPI_ISL_2567492, EPI_ISL_2567494, EPI_ISL_2567495, EPI_ISL_2676548                                                                                                                                                                                                                                                                                                                                                                                                                                                                                                                                                                                                                                                     | LABORATOIRE BIOESTEREL<br>LABORATOIRE FORTE BIO ST PAUL LES DAX                                             | CNR Virus des Infections Respiratoires - France SUD<br>CNR Virus des Infections Respiratoires - France SUD                                                                                                                                                                                            | Antonin Bal; Bruno Lina; Gregory Destras; Gwendolyne Burfin; Hadrien Regue; Laurence Josset; Martine Valette; Quentin Semanas<br>Antonin Bal; Bruno Lina; Gregory Destras; Gwendolyne Burfin; Hadrien Regue; Laurence Josset; Martine Valette; Quentin Semanas                                                                                                                                                                                                                                                                                           |                                                                                                                                                                                                                                                                                                                |
| EPI_ISL_2893787<br>EPI_ISL_2676692, EPI_ISL_2893832                                                                                                                                                                                                                                                                                                                                                                                                                                                                                                                                                                                                                                                                                                                         | LABORATOIRE UNILIANS DECINES<br>LABORATOIRE d'ANALYSES de BIOLOGIE MEDICALES                                | CNR Virus des Infections Respiratoires - France SUD<br>CNR Virus des Infections Respiratoires - France SUD                                                                                                                                                                                            | Antonin Bal; Bruno Lina; Gregory Destras; Gwendolyne Burfin; Hadrien Regue; Laurence Josset; Martine Valette; Quentin Semanas<br>Antonin Bal; Bruno Lina; Gregory Destras; Gwendolyne Burfin; Hadrien Regue; Laurence Josset; Martine Valette; Quentin Semanas                                                                                                                                                                                                                                                                                           |                                                                                                                                                                                                                                                                                                                |
| EPI_ISL_2893866<br>EPI_ISL_2801427                                                                                                                                                                                                                                                                                                                                                                                                                                                                                                                                                                                                                                                                                                                                          | LABORATOIRE- BIOESTERL<br>LABORATORIUM BADAŃ KLINICZNYCH WSSE w OPOLU                                       | CNR Virus des Infections Respiratoires - France SUD<br>National Institute of Public Health - National Institute of Hygiene                                                                                                                                                                            | Antonin Bal; Bruno Lina; Gregory Destras; Gwendolyne Burfin; Hadrien Regue; Laurence Josset; Martine Valette; Quentin Semanas<br>Gierczyński Rafał; Sadkowska-Todys Małgorzata; Wołkowicz Tomasz                                                                                                                                                                                                                                                                                                                                                         |                                                                                                                                                                                                                                                                                                                |
| EPI_ISL_2536122, EPI_ISL_2536124, EPI_ISL_2536127, EPI_ISL_2536129                                                                                                                                                                                                                                                                                                                                                                                                                                                                                                                                                                                                                                                                                                          | LAC UCoimbra                                                                                                | Instituto Nacional de Saude (INSA)                                                                                                                                                                                                                                                                    | Borges et al                                                                                                                                                                                                                                                                                                                                                                                                                                                                                                                                             |                                                                                                                                                                                                                                                                                                                |
| EPI_ISL_1904967, EPI_ISL_1904969, EPI_ISL_1904971, EPI_ISL_1904972, EPI_ISL_1904973                                                                                                                                                                                                                                                                                                                                                                                                                                                                                                                                                                                                                                                                                         | LAM ORIADE ABBAYE ST MARTIN D'HERES                                                                         | CNR Virus des Infections Respiratoires - France SUD                                                                                                                                                                                                                                                   | Antonin Bal; Bruno Lina; Gregory Destras; Gwendolyne Burfin; Hadrien Regue; Laurence Josset; Martine Valette; Quentin Semanas                                                                                                                                                                                                                                                                                                                                                                                                                            |                                                                                                                                                                                                                                                                                                                |
| EPI_ISL_2841774<br>EPI_ISL_2289248, EPI_ISL_2289249, EPI_ISL_2482846, EPI_ISL_2676752                                                                                                                                                                                                                                                                                                                                                                                                                                                                                                                                                                                                                                                                                       | LBM ALPHABIO, Marseille<br>LBM UNIBIO VALENTIN                                                              | LBM ALPHABIO, Marseille<br>CNR Virus des Infections Respiratoires - France SUD                                                                                                                                                                                                                        | Vincent GARCIA<br>Antonin Bal; Bruno Lina; Gregory Destras; Gwendolyne Burfin; Hadrien Regue; Laurence Josset; Martine Valette; Quentin Semanas                                                                                                                                                                                                                                                                                                                                                                                                          |                                                                                                                                                                                                                                                                                                                |
| EPI_ISL_2533818                                                                                                                                                                                                                                                                                                                                                                                                                                                                                                                                                                                                                                                                                                                                                             | LESP Baja California Sur                                                                                    | Instituto de Diagnostico y Referencia Epidemiologicos (INDRE)                                                                                                                                                                                                                                         | Abril Rodriguez-Maldonado; Ariadna Medina-Benitez; Claudia Wong-Aramblula; Ernesto Ramirez-Gonzalez.; Gisela Barrera-Badillo; Irma Lopez-Martinez; Joaquin Quiroz-Mercado; Lucia Hernandez-Rivas; Natividad Cruz-Ortiz; Sergio Rangel-Guerrero;                                                                                                                                                                                                                                                                                                          |                                                                                                                                                                                                                                                                                                                |

|                                                                                                                                                                                                                                                                                                                  |                                                                                                               |                                                                                                                                            |                                                                                                                                                                                                                                                                                                                                                                                                                                                                                                      |  |
|------------------------------------------------------------------------------------------------------------------------------------------------------------------------------------------------------------------------------------------------------------------------------------------------------------------|---------------------------------------------------------------------------------------------------------------|--------------------------------------------------------------------------------------------------------------------------------------------|------------------------------------------------------------------------------------------------------------------------------------------------------------------------------------------------------------------------------------------------------------------------------------------------------------------------------------------------------------------------------------------------------------------------------------------------------------------------------------------------------|--|
| EPI_ISL_2835024                                                                                                                                                                                                                                                                                                  | LESP Campeche                                                                                                 | Instituto de Diagnostico y Referencia Epidemiologicos (INDRE)                                                                              | Tatiana Nunez-Garcia; Vanessa Rivero-Arredondo                                                                                                                                                                                                                                                                                                                                                                                                                                                       |  |
| EPI_ISL_2246838, EPI_ISL_2443048, EPI_ISL_2533817, EPI_ISL_2674901, EPI_ISL_2674902, EPI_ISL_2674904, EPI_ISL_2835009, EPI_ISL_2835012, EPI_ISL_2835027, EPI_ISL_2835032, EPI_ISL_2835043                                                                                                                        | see above                                                                                                     | see above                                                                                                                                  | Abril Rodriguez-Maldonado; Ariadna Medina-Benitez; Claudia Wong-Arambula; Ernesto Ramirez-Gonzalez.; Gisela Barrera-Badillo; Irma Lopez-Martinez; Joaquin Quiroz-Mercado; Lucia Hernandez-Rivas; Natividad Cruz-Ortiz; Sergio Rangel-Guerrero; Tatiana Nunez-Garcia; Vanessa Rivero-Arredondo                                                                                                                                                                                                        |  |
| EPI_ISL_2246827                                                                                                                                                                                                                                                                                                  | LESP Ciudad de Mexico /LANS                                                                                   | Instituto de Diagnostico y Referencia Epidemiologicos (INDRE)                                                                              | Abril Rodriguez-Maldonado; Ariadna Medina-Benitez; Claudia Wong-Arambula; Ernesto Ramirez-Gonzalez.; Gisela Barrera-Badillo; Irma Lopez-Martinez; Joaquin Quiroz-Mercado; Lucia Hernandez-Rivas; Natividad Cruz-Ortiz; Sergio Rangel-Guerrero; Tatiana Nunez-Garcia; Vanessa Rivero-Arredondo                                                                                                                                                                                                        |  |
| EPI_ISL_2533821                                                                                                                                                                                                                                                                                                  | LESP Ciudad de México /DIAGNOMOL                                                                              | Instituto de Diagnostico y Referencia Epidemiologicos (INDRE)                                                                              | Abril Rodriguez-Maldonado; Ariadna Medina-Benitez; Claudia Wong-Arambula; Ernesto Ramirez-Gonzalez.; Gisela Barrera-Badillo; Irma Lopez-Martinez; Joaquin Quiroz-Mercado; Lucia Hernandez-Rivas; Natividad Cruz-Ortiz; Sergio Rangel-Guerrero; Tatiana Nunez-Garcia; Vanessa Rivero-Arredondo                                                                                                                                                                                                        |  |
| EPI_ISL_2835040                                                                                                                                                                                                                                                                                                  | LESP Estado de Mexico                                                                                         | Instituto de Diagnostico y Referencia Epidemiologicos (INDRE)                                                                              | Abril Rodriguez-Maldonado; Ariadna Medina-Benitez; Claudia Wong-Arambula; Ernesto Ramirez-Gonzalez.; Gisela Barrera-Badillo; Irma Lopez-Martinez; Joaquin Quiroz-Mercado; Lucia Hernandez-Rivas; Maribel Gonzalez-Villa; Natividad Cruz-Ortiz; Sergio Rangel-Guerrero; Tatiana Nunez-Garcia; Vanessa Rivero-Arredondo                                                                                                                                                                                |  |
| EPI_ISL_2094505                                                                                                                                                                                                                                                                                                  | LESP Jalisco                                                                                                  | Instituto de Diagnostico y Referencia Epidemiologicos (INDRE)                                                                              | Abril Rodriguez-Maldonado; Ariadna Medina-Benitez; Claudia Wong-Arambula; Ernesto Ramirez-Gonzalez.; Gisela Barrera-Badillo; Irma Lopez-Martinez; Joaquin Quiroz-Mercado; Lucia Hernandez-Rivas; Natividad Cruz-Ortiz; Sergio Rangel-Guerrero; Tatiana Nunez-Garcia; Vanessa Rivero-Arredondo                                                                                                                                                                                                        |  |
| EPI_ISL_2246829, EPI_ISL_2246830, EPI_ISL_2246831, EPI_ISL_2246832, EPI_ISL_2246833, EPI_ISL_2443050                                                                                                                                                                                                             | LESP Michoacan                                                                                                | Instituto de Diagnostico y Referencia Epidemiologicos (INDRE)                                                                              | Abril Rodriguez-Maldonado; Ariadna Medina-Benitez; Claudia Wong-Arambula; Ernesto Ramirez-Gonzalez.; Gisela Barrera-Badillo; Irma Lopez-Martinez; Joaquin Quiroz-Mercado; Lucia Hernandez-Rivas; Natividad Cruz-Ortiz; Sergio Rangel-Guerrero; Tatiana Nunez-Garcia; Vanessa Rivero-Arredondo                                                                                                                                                                                                        |  |
| EPI_ISL_2342999                                                                                                                                                                                                                                                                                                  | LESP Michoacan/LANS                                                                                           | Instituto de Diagnostico y Referencia Epidemiologicos (INDRE)                                                                              | Abril Rodriguez-Maldonado; Ariadna Medina-Benitez; Claudia Wong-Arambula; Ernesto Ramirez-Gonzalez.; Gisela Barrera-Badillo; Irma Lopez-Martinez; Joaquin Quiroz-Mercado; Lucia Hernandez-Rivas; Natividad Cruz-Ortiz; Sergio Rangel-Guerrero; Tatiana Nunez-Garcia; Vanessa Rivero-Arredondo                                                                                                                                                                                                        |  |
| EPI_ISL_2835008                                                                                                                                                                                                                                                                                                  | LESP Morelos                                                                                                  | Instituto de Diagnostico y Referencia Epidemiologicos (INDRE)                                                                              | Abril Rodriguez-Maldonado; Ariadna Medina-Benitez; Claudia Wong-Arambula; Ernesto Ramirez-Gonzalez.; Gisela Barrera-Badillo; Irma Lopez-Martinez; Joaquin Quiroz-Mercado; Lucia Hernandez-Rivas; Natividad Cruz-Ortiz; Sergio Rangel-Guerrero; Tatiana Nunez-Garcia; Vanessa Rivero-Arredondo                                                                                                                                                                                                        |  |
| EPI_ISL_2736785                                                                                                                                                                                                                                                                                                  | LESP Puebla                                                                                                   | Instituto de Diagnostico y Referencia Epidemiologicos (INDRE)                                                                              | Abril Rodriguez-Maldonado; Ariadna Medina-Benitez; Claudia Wong-Arambula; Ernesto Ramirez-Gonzalez.; Gisela Barrera-Badillo; Irma Lopez-Martinez; Joaquin Quiroz-Mercado; Lucia Hernandez-Rivas; Natividad Cruz-Ortiz; Sergio Rangel-Guerrero; Tatiana Nunez-Garcia; Vanessa Rivero-Arredondo                                                                                                                                                                                                        |  |
| EPI_ISL_2835014                                                                                                                                                                                                                                                                                                  | LESP Queretaro                                                                                                | Instituto de Diagnostico y Referencia Epidemiologicos (INDRE)                                                                              | Abril Rodriguez-Maldonado; Ariadna Medina-Benitez; Claudia Wong-Arambula; Ernesto Ramirez-Gonzalez.; Gisela Barrera-Badillo; Irma Lopez-Martinez; Joaquin Quiroz-Mercado; Lucia Hernandez-Rivas; Natividad Cruz-Ortiz; Sergio Rangel-Guerrero; Tatiana Nunez-Garcia; Vanessa Rivero-Arredondo                                                                                                                                                                                                        |  |
| EPI_ISL_2443049, EPI_ISL_2533820                                                                                                                                                                                                                                                                                 | LESP Quintana Roo                                                                                             | Instituto de Diagnostico y Referencia Epidemiologicos (INDRE)                                                                              | Abril Rodriguez-Maldonado; Ariadna Medina-Benitez; Claudia Wong-Arambula; Ernesto Ramirez-Gonzalez.; Gisela Barrera-Badillo; Irma Lopez-Martinez; Joaquin Quiroz-Mercado; Lucia Hernandez-Rivas; Natividad Cruz-Ortiz; Sergio Rangel-Guerrero; Tatiana Nunez-Garcia; Vanessa Rivero-Arredondo                                                                                                                                                                                                        |  |
| EPI_ISL_2246834, EPI_ISL_2246835, EPI_ISL_2246836, EPI_ISL_2246837, EPI_ISL_2736781, EPI_ISL_2736783, EPI_ISL_2835020                                                                                                                                                                                            | see above                                                                                                     | see above                                                                                                                                  | Abril Rodriguez-Maldonado; Ariadna Medina-Benitez; Claudia Wong-Arambula; Ernesto Ramirez-Gonzalez.; Gisela Barrera-Badillo; Irma Lopez-Martinez; Joaquin Quiroz-Mercado; Lucia Hernandez-Rivas; Natividad Cruz-Ortiz; Sergio Rangel-Guerrero; Tatiana Nunez-Garcia; Vanessa Rivero-Arredondo                                                                                                                                                                                                        |  |
| EPI_ISL_2533819                                                                                                                                                                                                                                                                                                  | LESP Yucatan                                                                                                  | Instituto de Diagnostico y Referencia Epidemiologicos (INDRE)                                                                              | Abril Rodriguez-Maldonado; Ariadna Medina-Benitez; Claudia Wong-Arambula; Ernesto Ramirez-Gonzalez.; Gisela Barrera-Badillo; Irma Lopez-Martinez; Joaquin Quiroz-Mercado; Lucia Hernandez-Rivas; Natividad Cruz-Ortiz; Sergio Rangel-Guerrero; Tatiana Nunez-Garcia; Vanessa Rivero-Arredondo                                                                                                                                                                                                        |  |
| EPI_ISL_2545652, EPI_ISL_2861683                                                                                                                                                                                                                                                                                 | LHUB-ULB                                                                                                      | Labo Klinische Biologie, UZA                                                                                                               | Basil Britto Xavier; Christine Lammens; Herman Goossens; Ines Verbesselt; Jasmine Coppens; Kathleen Holemans; Marie Le Mercier; Veerle Matheussen                                                                                                                                                                                                                                                                                                                                                    |  |
| EPI_ISL_2695350, EPI_ISL_2695354, EPI_ISL_2695361                                                                                                                                                                                                                                                                | Lab Dra Celeste Formosinho                                                                                    | Instituto Nacional de Saude (INSA)                                                                                                         | Borges et al                                                                                                                                                                                                                                                                                                                                                                                                                                                                                         |  |
| EPI_ISL_2617534                                                                                                                                                                                                                                                                                                  | Lab Genomik Solidaritas Indonesia                                                                             | National Institute of Health Research and Development                                                                                      | Arie Ardiansyah Nugraha; Hana Apsari Pawestri; Hartanti Dian Ikawati; Kartika Dewi Puspa; Krisna Pangesti; Meutia Kumaheri; Nelly Puspandari; Subangkit; Triyani Soekarso; Vivi Setiawaty                                                                                                                                                                                                                                                                                                            |  |
| EPI_ISL_2695396                                                                                                                                                                                                                                                                                                  | Lab La Salete Robles - VN Famalicao                                                                           | Instituto Nacional de Saude (INSA)                                                                                                         | Borges et al                                                                                                                                                                                                                                                                                                                                                                                                                                                                                         |  |
| EPI_ISL_1969245                                                                                                                                                                                                                                                                                                  | Lab RSUP DR Mohammad Hoesin Palembang                                                                         | National Institute of Health Research and Development                                                                                      | Arie Ardiansyah Nugraha; Hana Apsari Pawestri; Hartanti Dian Ikawati; Kartika Dewi Puspa; Krisna Pangesti; Nelly Puspandari; Subangkit; Triyani Soekarso; Vivi Setiawaty                                                                                                                                                                                                                                                                                                                             |  |
| EPI_ISL_1827216, EPI_ISL_2192420, EPI_ISL_2604978, EPI_ISL_2605118, EPI_ISL_2605502, EPI_ISL_2605553, EPI_ISL_2861441, EPI_ISL_2861490, EPI_ISL_2861502, EPI_ISL_2861533, EPI_ISL_2861553, EPI_ISL_2861560                                                                                                       | see above                                                                                                     | see above                                                                                                                                  | Bruno Verhasselt; Hannelore Hamerlinck; Marija Janevska                                                                                                                                                                                                                                                                                                                                                                                                                                              |  |
| EPI_ISL_2725164                                                                                                                                                                                                                                                                                                  | Lab. Microbiologia e Virologia Cotugno A.O. dei Colli - Istituto Zooprofilattico Sperimentale del Mezzogiorno | Telethon Institute of Genetics and Medicine (TIGEM)                                                                                        | Antonio Grimaldi Patrizia Annunziata Francesco Panariello Biancamaria Pierri Claudia Tiberio Teresa Giuliano Valentina Bouche Chiara Colantuono Maria Concetta Cuomo Denise Di Concilio Lucio Di Filippo Anna Manfredi Marcello Salvi Antonio Limone Luigi Atripaldi Pellegrino Cerino Andrea Ballabio Davide Cacchiarelli                                                                                                                                                                           |  |
| EPI_ISL_2121121                                                                                                                                                                                                                                                                                                  | LabKom - Labor Augsburg MVZ GmbH                                                                              | Robert Koch Institute                                                                                                                      |                                                                                                                                                                                                                                                                                                                                                                                                                                                                                                      |  |
| EPI_ISL_2260688                                                                                                                                                                                                                                                                                                  | LabKom - Labor Mainz MVZ GmbH                                                                                 | Robert Koch Institute                                                                                                                      |                                                                                                                                                                                                                                                                                                                                                                                                                                                                                                      |  |
| EPI_ISL_2536107, EPI_ISL_2695378, EPI_ISL_2695383, EPI_ISL_2895261                                                                                                                                                                                                                                               | Labeto - CAB - Leiria                                                                                         | Instituto Nacional de Saude (INSA)                                                                                                         | Borges et al                                                                                                                                                                                                                                                                                                                                                                                                                                                                                         |  |
| EPI_ISL_2854726                                                                                                                                                                                                                                                                                                  | Labkesda Kota Tangerang                                                                                       | National Institute of Health Research and Development                                                                                      | ; Arie Ardiansyah Nugraha; Hana Apsari Pawestri; Hartanti Dian Ikawati; Kartika Dewi Puspa; Krisna Pangesti; Nelly Puspandari; Subangkit; Triyani Soekarso; Vivi Setiawaty                                                                                                                                                                                                                                                                                                                           |  |
| EPI_ISL_2233094                                                                                                                                                                                                                                                                                                  | Labkesda Prov Kal Tim                                                                                         | National Institute of Health Research and Development                                                                                      | Arie Ardiansyah Nugraha; Hana Apsari Pawestri; Hartanti Dian Ikawati; Kartika Dewi Puspa; Krisna Pangesti; Nelly Puspandari; Subangkit; Triyani Soekarso; Vivi Setiawaty                                                                                                                                                                                                                                                                                                                             |  |
| EPI_ISL_1915156, EPI_ISL_2029687, EPI_ISL_2029713, EPI_ISL_2029727, EPI_ISL_2029740, EPI_ISL_2029751, EPI_ISL_2029877, EPI_ISL_2029916, EPI_ISL_2462964, EPI_ISL_2464181, EPI_ISL_2531945, EPI_ISL_2627997, EPI_ISL_2709277, EPI_ISL_2790915, EPI_ISL_2790980, EPI_ISL_2835716, EPI_ISL_2835722, EPI_ISL_2835839 | see above                                                                                                     | see above                                                                                                                                  | Angela Brisebarre; Arditl Cocco; BâNéDïcte Roquebert; Camille Capel; Caroline Devaux; Christophe Malabat; Corinne Maufrais; Damien Mornico; Elodie Etienne; Emmanuelle Pernal; Eric Grandsire; Etienne Simon-Lorière; Fabienne Artur; Frédéric Lemoine; Hugues Leroy; Jean Boyer; Judith Zerah; Louise Lefrançois; Marion Barbet; Maud Vanpeene; Méline Bizard; Nicolas Capron; Nouredine Sadeg; Pierre Lechat; Pierre Netzer; Sylvie Behillil; Sylvie Van der Werf; Victoire Baillet; Vincent Enouf |  |
| EPI_ISL_2709283                                                                                                                                                                                                                                                                                                  | Labo Analyses med                                                                                             | National Reference Center for Viruses of Respiratory Infections, Institut Pasteur, Paris                                                   | Angela Brisebarre; Camille Capel; Christophe Malabat; Corinne Maufrais; Etienne Simon-Lorière; Frédéric Lemoine; Louise Lefrançois; Marion Barbet; Maud Vanpeene; Méline Bizard; OphéLie Said-Delattre; Sylvie Behillil; Sylvie Van der Werf; Vincent Enouf                                                                                                                                                                                                                                          |  |
| EPI_ISL_2348577, EPI_ISL_2348578, EPI_ISL_2348579, EPI_ISL_2348581, EPI_ISL_2348587, EPI_ISL_2348591                                                                                                                                                                                                             | Labo Luc Olivier                                                                                              | GIGA Medical Genomics                                                                                                                      | Bouchra Boujemla; Cécile Meex; Keith Durkin; Maria Artesi; Marie-Pierre Hayette; Nathalie Renotte; Pierrette Melin; Raphaël Boreux; Sébastien Bontems; Vincent Bours                                                                                                                                                                                                                                                                                                                                 |  |
| EPI_ISL_2448636                                                                                                                                                                                                                                                                                                  | Laboffice                                                                                                     | CHU Poitiers                                                                                                                               | Agnes BEBY-DEFAUX; Birama N'DIAYE; Caroline MICHAUD; Magali GARCIA; Manon PRAT; Maxime PICHON; Nicolas LEVEQUE; Valentin BON-BARET                                                                                                                                                                                                                                                                                                                                                                   |  |
| EPI_ISL_1843504, EPI_ISL_2109111, EPI_ISL_2125917, EPI_ISL_2470015                                                                                                                                                                                                                                               | Labor 28 MVZ GmbH                                                                                             | Robert Koch Institute                                                                                                                      |                                                                                                                                                                                                                                                                                                                                                                                                                                                                                                      |  |
| EPI_ISL_2389915, EPI_ISL_2678387, EPI_ISL_2678417, EPI_ISL_2678421, EPI_ISL_2678435, EPI_ISL_2845807                                                                                                                                                                                                             | Labor Becker & Kollegen (Standort München)                                                                    | Robert Koch Institute                                                                                                                      |                                                                                                                                                                                                                                                                                                                                                                                                                                                                                                      |  |
| EPI_ISL_2339438                                                                                                                                                                                                                                                                                                  | Labor Berlin Charité Vivantes GmbH / Institut für Virologie                                                   | Charité Universitätsmedizin Berlin, Institut für Virologie/Labor Berlin                                                                    | Barbara Mühlemann; Christian Drostén; Christine Stephan; Peter Menzel; Rolf Schwarzer; Terry Jones; Victor M Corman                                                                                                                                                                                                                                                                                                                                                                                  |  |
| EPI_ISL_1904299                                                                                                                                                                                                                                                                                                  | Labor Doz DDr Stefan Mustafa                                                                                  | AGES IMED Vienna                                                                                                                           | Alexander Indra; Elisabeth Walter; Johanna Schmitt; Sara Meschini; Stefan Mustafa; Theodhora Ziu                                                                                                                                                                                                                                                                                                                                                                                                     |  |
| EPI_ISL_1566762, EPI_ISL_2845224, EPI_ISL_2845226, EPI_ISL_2845231                                                                                                                                                                                                                                               | Labor Dr. Heidrich & Kollegen MVZ GmbH Hamburg                                                                | Robert Koch Institute                                                                                                                      |                                                                                                                                                                                                                                                                                                                                                                                                                                                                                                      |  |
| EPI_ISL_2125017                                                                                                                                                                                                                                                                                                  | Labor Dr. Wisplinghoff - Köln                                                                                 | Robert Koch Institute                                                                                                                      |                                                                                                                                                                                                                                                                                                                                                                                                                                                                                                      |  |
| EPI_ISL_2845269                                                                                                                                                                                                                                                                                                  | Labor Dr. Wisplinghoff - Köln                                                                                 | Robert Koch Institute                                                                                                                      |                                                                                                                                                                                                                                                                                                                                                                                                                                                                                                      |  |
| EPI_ISL_1848757                                                                                                                                                                                                                                                                                                  | Labor MÄrncchengladbach MVZ Dr. Stein + Kollegen GbR                                                          | Robert Koch Institute                                                                                                                      |                                                                                                                                                                                                                                                                                                                                                                                                                                                                                                      |  |
| EPI_ISL_2111142, EPI_ISL_2762279                                                                                                                                                                                                                                                                                 | Laborarztpraxis Dres. med. Walther Weindel & Kollegen                                                         | Robert Koch Institute                                                                                                                      |                                                                                                                                                                                                                                                                                                                                                                                                                                                                                                      |  |
| EPI_ISL_2464430                                                                                                                                                                                                                                                                                                  | Laboratoire Ana-L                                                                                             | Department of Virology, Henri Mondor University Hospital, Assistance Publique Hôpitaux de Paris, Université Paris-Est Créteil, INSERM U955 | Alexandre Soulier; Christophe Rodriguez; Elisabeth Trawinski; Guillaume Gricourt; Jean-Michel Pawlotsky; Melissa N'Debi; Slim Fourati; Vanessa Demontant                                                                                                                                                                                                                                                                                                                                             |  |

|                                                                                                                                                                                                                                                                                                                                                                                                                                                                                                                                                                                                                                                                                                                                                                                                                                                                                                                                                                                                                                                                                                                                                                                                                                                                                                                                                                                                                                                                                                                                                                                                                                                                                                                                                                                                                                                                                                                                              |                                                                                                            |                                                                                                                                                                                                                                |                                                                                                                                                                                                                                                                                                                                                                                                                                                                                                                                                                                                                                                                                                                                                                                                                                                                                                                                                                                                                                                                                                                                                                                                                                                                                                                                                                                                                                                                                                                                                                                                                                                                                                                                               |
|----------------------------------------------------------------------------------------------------------------------------------------------------------------------------------------------------------------------------------------------------------------------------------------------------------------------------------------------------------------------------------------------------------------------------------------------------------------------------------------------------------------------------------------------------------------------------------------------------------------------------------------------------------------------------------------------------------------------------------------------------------------------------------------------------------------------------------------------------------------------------------------------------------------------------------------------------------------------------------------------------------------------------------------------------------------------------------------------------------------------------------------------------------------------------------------------------------------------------------------------------------------------------------------------------------------------------------------------------------------------------------------------------------------------------------------------------------------------------------------------------------------------------------------------------------------------------------------------------------------------------------------------------------------------------------------------------------------------------------------------------------------------------------------------------------------------------------------------------------------------------------------------------------------------------------------------|------------------------------------------------------------------------------------------------------------|--------------------------------------------------------------------------------------------------------------------------------------------------------------------------------------------------------------------------------|-----------------------------------------------------------------------------------------------------------------------------------------------------------------------------------------------------------------------------------------------------------------------------------------------------------------------------------------------------------------------------------------------------------------------------------------------------------------------------------------------------------------------------------------------------------------------------------------------------------------------------------------------------------------------------------------------------------------------------------------------------------------------------------------------------------------------------------------------------------------------------------------------------------------------------------------------------------------------------------------------------------------------------------------------------------------------------------------------------------------------------------------------------------------------------------------------------------------------------------------------------------------------------------------------------------------------------------------------------------------------------------------------------------------------------------------------------------------------------------------------------------------------------------------------------------------------------------------------------------------------------------------------------------------------------------------------------------------------------------------------|
| EPI_ISL_2893527,<br>EPI_ISL_2893532                                                                                                                                                                                                                                                                                                                                                                                                                                                                                                                                                                                                                                                                                                                                                                                                                                                                                                                                                                                                                                                                                                                                                                                                                                                                                                                                                                                                                                                                                                                                                                                                                                                                                                                                                                                                                                                                                                          | Laboratoire Hôpital Sainte Musse                                                                           | Laboratoire Hôpital Sainte Musse                                                                                                                                                                                               | Lionel Chollet                                                                                                                                                                                                                                                                                                                                                                                                                                                                                                                                                                                                                                                                                                                                                                                                                                                                                                                                                                                                                                                                                                                                                                                                                                                                                                                                                                                                                                                                                                                                                                                                                                                                                                                                |
| EPI_ISL_2401121,<br>EPI_ISL_2401139,<br>EPI_ISL_2401152                                                                                                                                                                                                                                                                                                                                                                                                                                                                                                                                                                                                                                                                                                                                                                                                                                                                                                                                                                                                                                                                                                                                                                                                                                                                                                                                                                                                                                                                                                                                                                                                                                                                                                                                                                                                                                                                                      | Laboratoire national de sante, Microbiology, Virology                                                      | Laboratoire national de sante, Microbiology, Microbial Genomics Platform                                                                                                                                                       | Anke Wienecke-Baldacchino; Catherine Ragimbeau; Fatu Djabi; Jessica Tapp; Lise Pignon; Raoul Salmon; Tamir Abdelrahman; Trung Nguyen Nguyen                                                                                                                                                                                                                                                                                                                                                                                                                                                                                                                                                                                                                                                                                                                                                                                                                                                                                                                                                                                                                                                                                                                                                                                                                                                                                                                                                                                                                                                                                                                                                                                                   |
| EPI_ISL_1917963,<br>EPI_ISL_2400942,<br>EPI_ISL_2400960                                                                                                                                                                                                                                                                                                                                                                                                                                                                                                                                                                                                                                                                                                                                                                                                                                                                                                                                                                                                                                                                                                                                                                                                                                                                                                                                                                                                                                                                                                                                                                                                                                                                                                                                                                                                                                                                                      | Laboratoires Reunis                                                                                        | Laboratoire national de sante, Microbiology, Microbial Genomics Platform                                                                                                                                                       | Anke Wienecke-Baldacchino; Bernard Weber; Catherine Ragimbeau; Fatu Djabi; Jessica Tapp; Lise Pignon; Raoul Salmon; Tamir Abdelrahman                                                                                                                                                                                                                                                                                                                                                                                                                                                                                                                                                                                                                                                                                                                                                                                                                                                                                                                                                                                                                                                                                                                                                                                                                                                                                                                                                                                                                                                                                                                                                                                                         |
| EPI_ISL_2400820, EPI_ISL_2400821, EPI_ISL_2400824, EPI_ISL_2400827, EPI_ISL_2400828, EPI_ISL_2400829, EPI_ISL_2400830                                                                                                                                                                                                                                                                                                                                                                                                                                                                                                                                                                                                                                                                                                                                                                                                                                                                                                                                                                                                                                                                                                                                                                                                                                                                                                                                                                                                                                                                                                                                                                                                                                                                                                                                                                                                                        |                                                                                                            |                                                                                                                                                                                                                                |                                                                                                                                                                                                                                                                                                                                                                                                                                                                                                                                                                                                                                                                                                                                                                                                                                                                                                                                                                                                                                                                                                                                                                                                                                                                                                                                                                                                                                                                                                                                                                                                                                                                                                                                               |
| see above                                                                                                                                                                                                                                                                                                                                                                                                                                                                                                                                                                                                                                                                                                                                                                                                                                                                                                                                                                                                                                                                                                                                                                                                                                                                                                                                                                                                                                                                                                                                                                                                                                                                                                                                                                                                                                                                                                                                    | Laboratoires d'analyses medicales - Ketterhill                                                             | Laboratoire national de sante, Microbiology, Microbial Genomics Platform                                                                                                                                                       | Anke Wienecke-Baldacchino; Caroline Scheiber; Catherine Ragimbeau; Fatu Djabi; Jessica Tapp; Lise Pignon; Raoul Salmon; Serge Vedy; Tamir Abdelrahman                                                                                                                                                                                                                                                                                                                                                                                                                                                                                                                                                                                                                                                                                                                                                                                                                                                                                                                                                                                                                                                                                                                                                                                                                                                                                                                                                                                                                                                                                                                                                                                         |
| EPI_ISL_2036263, EPI_ISL_2036266, EPI_ISL_2036268, EPI_ISL_2308278, EPI_ISL_2421279, EPI_ISL_2421280, EPI_ISL_2421281, EPI_ISL_2421282, EPI_ISL_2537480                                                                                                                                                                                                                                                                                                                                                                                                                                                                                                                                                                                                                                                                                                                                                                                                                                                                                                                                                                                                                                                                                                                                                                                                                                                                                                                                                                                                                                                                                                                                                                                                                                                                                                                                                                                      |                                                                                                            |                                                                                                                                                                                                                                |                                                                                                                                                                                                                                                                                                                                                                                                                                                                                                                                                                                                                                                                                                                                                                                                                                                                                                                                                                                                                                                                                                                                                                                                                                                                                                                                                                                                                                                                                                                                                                                                                                                                                                                                               |
| see above                                                                                                                                                                                                                                                                                                                                                                                                                                                                                                                                                                                                                                                                                                                                                                                                                                                                                                                                                                                                                                                                                                                                                                                                                                                                                                                                                                                                                                                                                                                                                                                                                                                                                                                                                                                                                                                                                                                                    | Laboratori de Referencia de Catalunya                                                                      | Laboratori de Referencia de Catalunya                                                                                                                                                                                          | Bellosillo B.; Canal M.; Hernandez JJ.; Padilla E.; Ramirez A.; Vilas A.                                                                                                                                                                                                                                                                                                                                                                                                                                                                                                                                                                                                                                                                                                                                                                                                                                                                                                                                                                                                                                                                                                                                                                                                                                                                                                                                                                                                                                                                                                                                                                                                                                                                      |
| EPI_ISL_2686054,<br>EPI_ISL_2686055,<br>EPI_ISL_2686072                                                                                                                                                                                                                                                                                                                                                                                                                                                                                                                                                                                                                                                                                                                                                                                                                                                                                                                                                                                                                                                                                                                                                                                                                                                                                                                                                                                                                                                                                                                                                                                                                                                                                                                                                                                                                                                                                      | Laboratorio Analisi Osp. Città di Castello - Azienda USL Umbria1                                           | Istituto Zooprofilattico Sperimentale dell'Abruzzo e Molise "G. Caporale"                                                                                                                                                      | Ancora M; Calistri P; Cammà C; Curini V; Delli Compagni E; Di Domenico M; Di Pasquale A; Lorusso A; Malagigi V; Mangone I; Marccaci M; Puglia I; Rinaldi A; Savini G; Scialabba S; Taccani P                                                                                                                                                                                                                                                                                                                                                                                                                                                                                                                                                                                                                                                                                                                                                                                                                                                                                                                                                                                                                                                                                                                                                                                                                                                                                                                                                                                                                                                                                                                                                  |
| EPI_ISL_2340135                                                                                                                                                                                                                                                                                                                                                                                                                                                                                                                                                                                                                                                                                                                                                                                                                                                                                                                                                                                                                                                                                                                                                                                                                                                                                                                                                                                                                                                                                                                                                                                                                                                                                                                                                                                                                                                                                                                              | Laboratorio Aziendale di Microbiologia e Virologia, Azienda Sanitaria dell'Alto Adige                      | Laboratorio Aziendale di Microbiologia e Virologia, Azienda Sanitaria dell'Alto Adige                                                                                                                                          | Anne Picard; Chiara Cantaloni; Claudia Volpato; Elisa Masi; Elisabetta Giacobazzi; Elisabetta Pagani; Irene Bianconi; Stefanie Wieser                                                                                                                                                                                                                                                                                                                                                                                                                                                                                                                                                                                                                                                                                                                                                                                                                                                                                                                                                                                                                                                                                                                                                                                                                                                                                                                                                                                                                                                                                                                                                                                                         |
| EPI_ISL_2671488,<br>EPI_ISL_2671539,<br>EPI_ISL_2671563,<br>EPI_ISL_2671649                                                                                                                                                                                                                                                                                                                                                                                                                                                                                                                                                                                                                                                                                                                                                                                                                                                                                                                                                                                                                                                                                                                                                                                                                                                                                                                                                                                                                                                                                                                                                                                                                                                                                                                                                                                                                                                                  | Laboratorio Central de Epidemiologia (LCE)                                                                 | Unidad de Genomica Avanzada                                                                                                                                                                                                    | ; Alejandra Garcia-Gasca; Alejandra Hernandez-Teran; Alejandro Sanchez-Flores; Alfredo Herrera-Estrella; Alicia Ocaña-Mondragon; Andreu Comas-Garcia; Angel Gustavo Salas-Lais; Antonio Loza Roman; Bernardo Martinez-Miguel; Blanca Taboada; Brenda Irasema Maldonado-Meza; Bruno Gomez-Gil; Carla Ivon Herrera-Najera; Carlos F. Arias; Celia Boukadida; Celida Duque Molina; Célida Martinez- Rodríguez; Clara Esperanza Santacruz-Tinoco; Concepcion Grajales-Muñiz; Consorcio Mexicano de Vigilancia Genomica (CoViGen-Mex). Authors (in alphabetical order); Julio Elias Alvarado-Yaah; Cristóbal Cháidez-Quiróz; Célida Duque Molina; Célida Martínez- Rodríguez; Daniel Fregoso-Rueda; Daniel Lira Morales; Eduardo Becerril-Vargas; Fernando Fontove-Herrera; Fidencio Mejia-Nepomuceno; Francisco Pulido; Gloria Elena Espinosa-Ayala; Gloria Maria Molina-Salinas; Gloria Vazquez; Hector Esteban Paz-Juarez; Hector Montoya-Fuentes; Helen Haydee Fernanda Ramirez-Plascencia; Irvin Gonzalez-Lopez; Jean Pierre Gonzalez; Jesus Hernandez; Joel Armando Vazquez-Perez.; Jorge Salas-Hernandez; Jose Antonio Enciso-Moreno; Jose Arturo Martinez-Orozco; Jose Esteban Muñoz-Medina; Jose de Jesus Nuñez-Contreras; Juan Bautista Chale-Dzul; Julissa Enciso-Ibarra; Luis Alberto Ochoa-Carrera; Margarita Matias-Florentino; Maria Guadalupe Santiago-Mauricio; Maria Guadalupe de Jesus Mireles-Rivera; Mario Mujica-Sanchez; Marissa Perez-Garcia; Nelly Selem-Mojica; Pavel Isa; Ricardo Ciria Merce; Ricardo Grande; Rosa Maria Gutierrez Rios; Santiago avila-Rios; Selene Zarate; Susana Lopez; Veronica Mata-Haro; Victor Eduardo Garcia-Arias; Victor Hugo Borja-Aburto                                                   |
| EPI_ISL_2681059, EPI_ISL_2681064, EPI_ISL_2681065, EPI_ISL_2681113, EPI_ISL_2681155, EPI_ISL_2681156, EPI_ISL_2681181, EPI_ISL_2681184, EPI_ISL_2681188, EPI_ISL_2681189, EPI_ISL_2681193, EPI_ISL_2681194, EPI_ISL_2681196, EPI_ISL_2681199, EPI_ISL_2681205, EPI_ISL_2681214, EPI_ISL_2681229, EPI_ISL_2681231, EPI_ISL_2681251, EPI_ISL_2801772, EPI_ISL_2801780, EPI_ISL_2801789, EPI_ISL_2801809, EPI_ISL_2801810, EPI_ISL_2801811, EPI_ISL_2801814, EPI_ISL_2801815, EPI_ISL_2801816, EPI_ISL_2801823, EPI_ISL_2801829, EPI_ISL_2801881                                                                                                                                                                                                                                                                                                                                                                                                                                                                                                                                                                                                                                                                                                                                                                                                                                                                                                                                                                                                                                                                                                                                                                                                                                                                                                                                                                                                |                                                                                                            |                                                                                                                                                                                                                                |                                                                                                                                                                                                                                                                                                                                                                                                                                                                                                                                                                                                                                                                                                                                                                                                                                                                                                                                                                                                                                                                                                                                                                                                                                                                                                                                                                                                                                                                                                                                                                                                                                                                                                                                               |
| see above                                                                                                                                                                                                                                                                                                                                                                                                                                                                                                                                                                                                                                                                                                                                                                                                                                                                                                                                                                                                                                                                                                                                                                                                                                                                                                                                                                                                                                                                                                                                                                                                                                                                                                                                                                                                                                                                                                                                    | Laboratorio Central de Epidemiologia (LCE)                                                                 | Instituto de Biotecnología de la UNAM                                                                                                                                                                                          | ; Alejandra García-Gasca; Alejandra Hernández-Terán; Alejandro Sánchez-Flores; Alfredo Herrera-Estrella; Alicia Ocaña-Mondragón; Andreu Comas-García; Angel Gustavo Salas-Lais; Antonio Loza Román; Bernardo Martínez-Miguel; Blanca Taboada; Brenda Irasema Maldonado-Meza; Bruno Gómez-Gil; Carla Ivón Herrera-Najera; Carlos F. Arias; Celia Boukadida; Clara Esperanza Santacruz-Tinoco; Concepción Grajales-Muñiz; Consorcio Mexicano de Vigilancia Genómica (CoViGen-Mex). Authors (in alphabetical order); Julio Elias Alvarado-Yaah; Cristóbal Cháidez-Quiróz; Célida Duque Molina; Célida Martínez- Rodríguez; Daniel Fregoso-Rueda; Daniel Lira Morales; Eduardo Becerril-Vargas; Fernando Fontove-Herrera; Fidencio Mejía-Nepomuceno; Francisco Pulido; Gloria Elena Espinosa-Ayala; Gloria María Molina-Salinas; Gloria Vazquez; Hector Esteban Paz-Juárez; Hector Montoya-Fuentes; Helen Haydee Fernanda Ramirez-Plascencia; Irvin González-López; Jean Pierre González; Jesús Hernández; Joel Armando Vázquez-Pérez.; Jorge Salas-Hernández; José Antonio Enciso-Moreno; José Arturo Martínez-Orozco; José Esteban Muñoz-Medina; José de Jesús Nuñez-Contreras; Juan Bautista Chale-Dzul; Julissa Enciso-Ibarra; Luis Alberto Ochoa-Carrera; Margarita Matias-Florentino; Mario Mujica-Sánchez; Marissa Perez-Garcia; Maria Guadalupe Santiago-Muricio; María Guadalupe de Jesús Mireles-Rivera; Nelly Sélem-Mojica; Pavel Isa; Ricardo Ciria Merce; Ricardo Grande; Rosa María Gutierrez Rios; Santiago Avila-Rios; Selene Zarate; Susana Lopez; Veronica Mata-Haro; Victor Eduardo Garcia-Arias; Victor Hugo Borja-Aburto                                                                                                     |
| EPI_ISL_2645412, EPI_ISL_2645413, EPI_ISL_2645414, EPI_ISL_2645415, EPI_ISL_2645416                                                                                                                                                                                                                                                                                                                                                                                                                                                                                                                                                                                                                                                                                                                                                                                                                                                                                                                                                                                                                                                                                                                                                                                                                                                                                                                                                                                                                                                                                                                                                                                                                                                                                                                                                                                                                                                          | Laboratorio Central de Saude Publica do Estado Maranhao (LACEN-MA)                                         | Laboratory of Respiratory Viruses and Measles, Oswaldo Cruz Institute, FIOCRUZ                                                                                                                                                 | Alex Pauvolid-Corrêa; Alice Sampaio Rocha; Ana Beatriz Machado Lima; Ana Carolina Mendonca; Anna Carolina Paixao; Elisa Cavalcante Pereira; Fernando Motta; Lidio Gonçalves Lima Neto; Luciana Appolinario; Marilda Siqueira on behalf of the Fiocruz COVID-19 Genomic Surveillance Network; Mia Ferreira de Araujo; Paola Resende; Renata Serrano Lopes; Taina Venas                                                                                                                                                                                                                                                                                                                                                                                                                                                                                                                                                                                                                                                                                                                                                                                                                                                                                                                                                                                                                                                                                                                                                                                                                                                                                                                                                                         |
| EPI_ISL_2645417, EPI_ISL_2645418                                                                                                                                                                                                                                                                                                                                                                                                                                                                                                                                                                                                                                                                                                                                                                                                                                                                                                                                                                                                                                                                                                                                                                                                                                                                                                                                                                                                                                                                                                                                                                                                                                                                                                                                                                                                                                                                                                             | Laboratorio Central de Saude Publica do Estado do Maranhao (LACEN-MA)                                      | Laboratory of Respiratory Viruses and Measles, Oswaldo Cruz Institute, FIOCRUZ                                                                                                                                                 | Alex Pauvolid-Corrêa; Alice Sampaio Rocha; Ana Beatriz Machado Lima; Ana Carolina Mendonca; Anna Carolina Paixao; Elisa Cavalcante Pereira; Fernando Motta; Lidio Gonçalves Lima Neto; Luciana Appolinario; Marilda Siqueira on behalf of the Fiocruz COVID-19 Genomic Surveillance Network; Mia Ferreira de Araujo; Paola Resende; Renata Serrano Lopes; Taina Venas                                                                                                                                                                                                                                                                                                                                                                                                                                                                                                                                                                                                                                                                                                                                                                                                                                                                                                                                                                                                                                                                                                                                                                                                                                                                                                                                                                         |
| EPI_ISL_2466268                                                                                                                                                                                                                                                                                                                                                                                                                                                                                                                                                                                                                                                                                                                                                                                                                                                                                                                                                                                                                                                                                                                                                                                                                                                                                                                                                                                                                                                                                                                                                                                                                                                                                                                                                                                                                                                                                                                              | Laboratorio Central de Saude Publica do Estado do Rio de Janeiro (LACEN-RJ)                                | Laboratory of Respiratory Viruses and Measles, Oswaldo Cruz Institute, FIOCRUZ                                                                                                                                                 | Alice Sampaio Rocha; Ana Carolina Mendonca; Andrea Cony Cavalcanti; Anna Carolina Paixao; Elisa Cavalcante Pereira; Fernando Motta; Luciana Appolinario; Marilda Siqueira on behalf of the Fiocruz COVID-19 Genomic Surveillance Network; Paola Resende; Renata Serrano Lopes; Taina Venas                                                                                                                                                                                                                                                                                                                                                                                                                                                                                                                                                                                                                                                                                                                                                                                                                                                                                                                                                                                                                                                                                                                                                                                                                                                                                                                                                                                                                                                    |
| EPI_ISL_2155359, EPI_ISL_2155363, EPI_ISL_2155365, EPI_ISL_2155367, EPI_ISL_2155368, EPI_ISL_2240824, EPI_ISL_2361493, EPI_ISL_2536207                                                                                                                                                                                                                                                                                                                                                                                                                                                                                                                                                                                                                                                                                                                                                                                                                                                                                                                                                                                                                                                                                                                                                                                                                                                                                                                                                                                                                                                                                                                                                                                                                                                                                                                                                                                                       | see above                                                                                                  | Laboratorio HUB -Azienda Ospedaliero Universitaria - AOU - Cagliari                                                                                                                                                            | Alessandra Scano; Ferdinando Coghe; Germano Orrù; Miriam Loddò; Riccardo Cappai; Sara Fais; Valentina Medda                                                                                                                                                                                                                                                                                                                                                                                                                                                                                                                                                                                                                                                                                                                                                                                                                                                                                                                                                                                                                                                                                                                                                                                                                                                                                                                                                                                                                                                                                                                                                                                                                                   |
| EPI_ISL_1970733                                                                                                                                                                                                                                                                                                                                                                                                                                                                                                                                                                                                                                                                                                                                                                                                                                                                                                                                                                                                                                                                                                                                                                                                                                                                                                                                                                                                                                                                                                                                                                                                                                                                                                                                                                                                                                                                                                                              | Laboratorio analisi - Policlinico San Pietro                                                               | Laboratory of Clinical Microbiology, Virology and Bioemergencies, ASST Fatebenefratelli Sacco - Sacco Hospital                                                                                                                 | Alberto Rizzo; Alessandro Mancon; Fiorenza Bracchitta; Luca Rizzuto; Maria Rita Gismondo; Valeria Micheli                                                                                                                                                                                                                                                                                                                                                                                                                                                                                                                                                                                                                                                                                                                                                                                                                                                                                                                                                                                                                                                                                                                                                                                                                                                                                                                                                                                                                                                                                                                                                                                                                                     |
| EPI_ISL_2501860                                                                                                                                                                                                                                                                                                                                                                                                                                                                                                                                                                                                                                                                                                                                                                                                                                                                                                                                                                                                                                                                                                                                                                                                                                                                                                                                                                                                                                                                                                                                                                                                                                                                                                                                                                                                                                                                                                                              | Laboratorio analisi, IRCCS Policlinico San Donato                                                          | Laboratory of Clinical Microbiology, Virology and Bioemergencies, ASST Fatebenefratelli Sacco - Sacco Hospital                                                                                                                 | Alberto Rizzo; Alessandro Mancon; Fiorenza Bracchitta; Maria Rita Gismondo; Valeria Micheli                                                                                                                                                                                                                                                                                                                                                                                                                                                                                                                                                                                                                                                                                                                                                                                                                                                                                                                                                                                                                                                                                                                                                                                                                                                                                                                                                                                                                                                                                                                                                                                                                                                   |
| EPI_ISL_2562268, EPI_ISL_2652249                                                                                                                                                                                                                                                                                                                                                                                                                                                                                                                                                                                                                                                                                                                                                                                                                                                                                                                                                                                                                                                                                                                                                                                                                                                                                                                                                                                                                                                                                                                                                                                                                                                                                                                                                                                                                                                                                                             | Laboratorio de Referencial Nacional de Virus Respiratorios                                                 | Laboratorio de Referencial Nacional de Virus Respiratorios                                                                                                                                                                     | Carlos Padilla Rojas; Henri Bailon Calderon; Iris Silva Molina; Joseph Huayra Niquen; Lely Solari Zerpa; Luis Barcena Flores; Marco Galarza Perez; Nancy Rojas Serrano; Omar Caceres Rey; Orson Mestanza Millones; Priscila Lope Pari; Sandra Morales Ruiz; Steve Acedo Lazo; Veronica Hurtado Vela                                                                                                                                                                                                                                                                                                                                                                                                                                                                                                                                                                                                                                                                                                                                                                                                                                                                                                                                                                                                                                                                                                                                                                                                                                                                                                                                                                                                                                           |
| EPI_ISL_2544220, EPI_ISL_2544231, EPI_ISL_2708969                                                                                                                                                                                                                                                                                                                                                                                                                                                                                                                                                                                                                                                                                                                                                                                                                                                                                                                                                                                                                                                                                                                                                                                                                                                                                                                                                                                                                                                                                                                                                                                                                                                                                                                                                                                                                                                                                            | Laboratorio di Microbiologia                                                                               | Laboratorio di Microbiologia                                                                                                                                                                                                   | Martineti Luccchini Gladys; Valeria Spina                                                                                                                                                                                                                                                                                                                                                                                                                                                                                                                                                                                                                                                                                                                                                                                                                                                                                                                                                                                                                                                                                                                                                                                                                                                                                                                                                                                                                                                                                                                                                                                                                                                                                                     |
| EPI_ISL_2650443                                                                                                                                                                                                                                                                                                                                                                                                                                                                                                                                                                                                                                                                                                                                                                                                                                                                                                                                                                                                                                                                                                                                                                                                                                                                                                                                                                                                                                                                                                                                                                                                                                                                                                                                                                                                                                                                                                                              | Laboratorio di Riferimento Regionale della Sicilia Occidentale per l'Emergenza COVID-19                    | Laboratorio di Riferimento Regionale della Sicilia Occidentale per l'Emergenza COVID-19                                                                                                                                        | Carmelo Massimo Maida; Claudio Costantino; Daniela Di Naro; Fabio Tramuto; Francesco Vitale; Giorgio Graziano; Giulia Randazzo; Vincenzo Restivo; Walter Mazzucco                                                                                                                                                                                                                                                                                                                                                                                                                                                                                                                                                                                                                                                                                                                                                                                                                                                                                                                                                                                                                                                                                                                                                                                                                                                                                                                                                                                                                                                                                                                                                                             |
| EPI_ISL_2680919, EPI_ISL_2680921, EPI_ISL_2680926, EPI_ISL_2894549, EPI_ISL_2894550                                                                                                                                                                                                                                                                                                                                                                                                                                                                                                                                                                                                                                                                                                                                                                                                                                                                                                                                                                                                                                                                                                                                                                                                                                                                                                                                                                                                                                                                                                                                                                                                                                                                                                                                                                                                                                                          | Laboratorios Delia Barraza                                                                                 | Laboratorio nacional-LANIIA-CIAD                                                                                                                                                                                               | ; Alejandra García-Gasca; Alejandra Hernández-Terán; Alejandro Sánchez-Flores; Alfredo Herrera-Estrella; Alicia Ocaña-Mondragón; Andreu Comas-García; Angel Gustavo Salas-Lais; Antonio Loza Román; Bernardo Martínez-Miguel; Blanca Taboada; Brenda Irasema Maldonado-Meza; Bruno Gómez-Gil; Carla Ivón Herrera-Najera; Carlos F. Arias; Celia Boukadida; Clara Esperanza Santacruz-Tinoco; Claudia Soto Félix; Concepción Grajales-Muñiz; Consorcio Mexicano de Vigilancia Genómica (CoViGen-Mex). Authors (in alphabetical order); Julio Elias Alvarado-Yaah; Cristóbal Cháidez-Quiróz; Célida Duque Molina; Célida Martínez- Rodríguez; Daniel Fregoso-Rueda; Daniel Lira Morales; Eduardo Becerril-Vargas; Fernando Fontove-Herrera; Fidencio Mejía-Nepomuceno; Francisco Pulido; Gloria Elena Espinosa-Ayala; Gloria María Molina-Salinas; Gloria Vazquez; Hector Esteban Paz-Juarez; Hector Montoya-Fuentes; Helen Haydee Fernanda Ramirez-Plascencia; Irvin González-López; Jean Pierre González; Jesús Hernández; Joel Armando Vázquez-Pérez. Laboratorios Delia Barraza: María Delia Barraza Sámano; Jorge Salas-Hernández; José Antonio Enciso-Moreno; José Arturo Martínez-Orozco; José Esteban Muñoz-Medina; José de Jesús Nuñez-Contreras; Juan Bautista Chale-Dzul; Julissa Enciso-Ibarra; Luis Alberto Ochoa-Carrera; Margarita Matías-Florentino; Mario Mujica-Sánchez; Marissa Perez-Garcia; María Guadalupe Santiago-Mauricio; Maria Guadalupe de Jesús Mireles-Rivera; Melissa García Angulo.; Nelly Sélem-Mojica; Pavel Isa; Ricardo Ciria Merce; Ricardo Grande; Rosa María Gutiérrez Rios; Santiago Avila-Rios; Selene Zarate; Susana Lopez; Verónica Mata-Haro; Victor Eduardo Garcia-Arias; Victor Hugo Borja-Aburto |
| EPI_ISL_2801429                                                                                                                                                                                                                                                                                                                                                                                                                                                                                                                                                                                                                                                                                                                                                                                                                                                                                                                                                                                                                                                                                                                                                                                                                                                                                                                                                                                                                                                                                                                                                                                                                                                                                                                                                                                                                                                                                                                              | Laboratorium Diagnostyczne Centrum Medycznego Luxmed                                                       | National Institute of Public Health - National Institute of Hygiene                                                                                                                                                            | Gierczyński Rafał; Sadkowska-Todys Małgorzata; Wolkowicz Tomasz                                                                                                                                                                                                                                                                                                                                                                                                                                                                                                                                                                                                                                                                                                                                                                                                                                                                                                                                                                                                                                                                                                                                                                                                                                                                                                                                                                                                                                                                                                                                                                                                                                                                               |
| EPI_ISL_2726789                                                                                                                                                                                                                                                                                                                                                                                                                                                                                                                                                                                                                                                                                                                                                                                                                                                                                                                                                                                                                                                                                                                                                                                                                                                                                                                                                                                                                                                                                                                                                                                                                                                                                                                                                                                                                                                                                                                              | Laboratorium Diagnostyczno-Analityczne Ośrodek Profilaktyki i Epidemiologii Nowotworów im. A. Piętkowskiej | 1. National Institute of Public Health - National Institute of Hygiene, Warsaw, Poland 2. Biobank Lab, University of Lodz 3. Laboratory of Respiratory Viruses, Teaching and Clinical Center of the Medical University of Lodz | Dominik Strapagiel; Izabela Drózdż; Jakub Lach; Katarzyna Zacharczuk; Klaudyna Królikowska; Maciej Borawiec; Magdalena Nowakowska; Magdalena Traczyk-Borszyńska; Marcin Słomka; Marta Sobalska-Kwapis; Małgorzata Sadkowska-Todys; Tomasz Płoszaj; Tomasz Wolkowicz                                                                                                                                                                                                                                                                                                                                                                                                                                                                                                                                                                                                                                                                                                                                                                                                                                                                                                                                                                                                                                                                                                                                                                                                                                                                                                                                                                                                                                                                           |
| EPI_ISL_1611370, EPI_ISL_1683986, EPI_ISL_1684717, EPI_ISL_1799336, EPI_ISL_1801624, EPI_ISL_1926283, EPI_ISL_1927603, EPI_ISL_1928600, EPI_ISL_1929448, EPI_ISL_2045440, EPI_ISL_2045852, EPI_ISL_2045959, EPI_ISL_2183147, EPI_ISL_2306709, EPI_ISL_2306819, EPI_ISL_2306894, EPI_ISL_2307000, EPI_ISL_2307070, EPI_ISL_2398661, EPI_ISL_2398900, EPI_ISL_2399078, EPI_ISL_2399106, EPI_ISL_2399205, EPI_ISL_2399232, EPI_ISL_2480235, EPI_ISL_2480236, EPI_ISL_2480295, EPI_ISL_2480300, EPI_ISL_2480369, EPI_ISL_2480438, EPI_ISL_2480454, EPI_ISL_2480537, EPI_ISL_2480545, EPI_ISL_2480550, EPI_ISL_2480708, EPI_ISL_2482114, EPI_ISL_2482162, EPI_ISL_2482278, EPI_ISL_2611146, EPI_ISL_2611164, EPI_ISL_2611178, EPI_ISL_2611181, EPI_ISL_2611197, EPI_ISL_2611204, EPI_ISL_2611205, EPI_ISL_2611214, EPI_ISL_2611224, EPI_ISL_2611228, EPI_ISL_2611291, EPI_ISL_2611299, EPI_ISL_2611333, EPI_ISL_2611337, EPI_ISL_2611354, EPI_ISL_2611362, EPI_ISL_2611370, EPI_ISL_2611381, EPI_ISL_2611421, EPI_ISL_2611425, EPI_ISL_2611426, EPI_ISL_2872167, EPI_ISL_2872199, EPI_ISL_2872211, EPI_ISL_2872214, EPI_ISL_2872226, EPI_ISL_2872249, EPI_ISL_2872261, EPI_ISL_2872271, EPI_ISL_2872277, EPI_ISL_2872280, EPI_ISL_2872282, EPI_ISL_2872291, EPI_ISL_2872294, EPI_ISL_2872297, EPI_ISL_2872319, EPI_ISL_2872345, EPI_ISL_2872364, EPI_ISL_2872373, EPI_ISL_2872401, EPI_ISL_2872434, EPI_ISL_2872437, EPI_ISL_2872440, EPI_ISL_2872454, EPI_ISL_2872457, EPI_ISL_2872458, EPI_ISL_2872526, EPI_ISL_2872528, EPI_ISL_2872529, EPI_ISL_2872554, EPI_ISL_2872562, EPI_ISL_2872563, EPI_ISL_2872564, EPI_ISL_2872567, EPI_ISL_2872568, EPI_ISL_2872569, EPI_ISL_2872570, EPI_ISL_2872571, EPI_ISL_2872572, EPI_ISL_2872573, EPI_ISL_2872583, EPI_ISL_2872591, EPI_ISL_2872611, EPI_ISL_2872613, EPI_ISL_2872697, EPI_ISL_2872699, EPI_ISL_2872702, EPI_ISL_2872704, EPI_ISL_2872784, EPI_ISL_2872861, EPI_ISL_2873032, EPI_ISL_2873072 |                                                                                                            |                                                                                                                                                                                                                                |                                                                                                                                                                                                                                                                                                                                                                                                                                                                                                                                                                                                                                                                                                                                                                                                                                                                                                                                                                                                                                                                                                                                                                                                                                                                                                                                                                                                                                                                                                                                                                                                                                                                                                                                               |
| see above                                                                                                                                                                                                                                                                                                                                                                                                                                                                                                                                                                                                                                                                                                                                                                                                                                                                                                                                                                                                                                                                                                                                                                                                                                                                                                                                                                                                                                                                                                                                                                                                                                                                                                                                                                                                                                                                                                                                    | Laboratory Corporation of America                                                                          | Centers for Disease Control and Prevention Division of Viral Diseases, Pathogen Discovery                                                                                                                                      | Adrian Paskey; Amanda Douglas; Amanda Suchanec; Andrea Throop; Ayla Burns; Benjamin Rambo-Martin; Bobbi Croy; Brian Krueger; Brian Norvell; Christopher Gulvick; Christos Petropoulos; Clinton R. Paden; Craig Lukasik; Dakota Howard; Darlene Wagner; Debbie Boles; Dhvani Batra; Duncan MacCannell; Eyad Almasri; Goran Stevovic; Howard Engler; Hrushikesh Deshmukh; Jake Humphrey; Jana Schroth; Jason Caravas; Joe Voshell; John Pruitt; Jonathan Meltzer; Jonathan Williams; Kara Moser; Kimberly Wagner; Lax Iyer; Lisa Pfefferle; Lyndon Tilson; Manoj Jain; Marcia Eisenberg; Mary Ann Cristobal; Mary Williamson; Matthew Robinson; Matthew Schmerer; Michael Levandowski; Mike Sapeta; Mindy Nye; Minoo Agarwal; Mohan Kalli; Nuthawin Charoensri; Oren Cohen; Peter W. Cook; Prashant Gupta; Qian Zeng; Rama Ghatti; Scott Parker; Scott Ryan; Scott Sammons; Shatavia Morrison; Stanley Letovsky; Steven Ragan; Suresh Babu Selvaraju; Susan Countryman; Susan Hicks; Suzanne Dale; Thomas Urban; Tim Kupalh; Tricia Zwiefelhofer; Vincent Drouillon; Yvette Unoarumhi                                                                                                                                                                                                                                                                                                                                                                                                                                                                                                                                                                                                                                                           |
| EPI_ISL_1716736                                                                                                                                                                                                                                                                                                                                                                                                                                                                                                                                                                                                                                                                                                                                                                                                                                                                                                                                                                                                                                                                                                                                                                                                                                                                                                                                                                                                                                                                                                                                                                                                                                                                                                                                                                                                                                                                                                                              | Laboratory of Immunohematology, Division of Hematology                                                     | Greek Genome Center, Biomedical Research Foundation of the Academy of Athens (BRFAA)                                                                                                                                           | Athanasia Mouzaki; Dimitrios Thanos; Emmanouil Athanasiadis; Ioannis Vatsellas; Katerina Zoi; Theodoros Loupis                                                                                                                                                                                                                                                                                                                                                                                                                                                                                                                                                                                                                                                                                                                                                                                                                                                                                                                                                                                                                                                                                                                                                                                                                                                                                                                                                                                                                                                                                                                                                                                                                                |
| EPI_ISL_2611031                                                                                                                                                                                                                                                                                                                                                                                                                                                                                                                                                                                                                                                                                                                                                                                                                                                                                                                                                                                                                                                                                                                                                                                                                                                                                                                                                                                                                                                                                                                                                                                                                                                                                                                                                                                                                                                                                                                              | Labormedizinisches Zentrum Dr Risch                                                                        | Clinical Bacteriology                                                                                                                                                                                                          | Adrian Egli; Alfredo Mari; Fanny Wegner; Hans Hirsch; Helena MB Seth-Smith; Julia Bielicki; Karoline Leuzinger; Lorenz Risch; Manuel Battegay; Martin Risch; Nadia Wohlwend; Tim Roloff                                                                                                                                                                                                                                                                                                                                                                                                                                                                                                                                                                                                                                                                                                                                                                                                                                                                                                                                                                                                                                                                                                                                                                                                                                                                                                                                                                                                                                                                                                                                                       |
| EPI_ISL_2677318                                                                                                                                                                                                                                                                                                                                                                                                                                                                                                                                                                                                                                                                                                                                                                                                                                                                                                                                                                                                                                                                                                                                                                                                                                                                                                                                                                                                                                                                                                                                                                                                                                                                                                                                                                                                                                                                                                                              | Labortorio Central de Saude Publica do Estado do Rio de Janeiro (LACEN/RJ)                                 | Laboratory of Respiratory Viruses and Measles, Oswaldo Cruz Institute, FIOCRUZ                                                                                                                                                 | Alex Pauvolid-Corrêa; Alice Sampaio Rocha; Ana Beatriz Machado Lima; Ana Carolina Mendonca; Andrea Cony Cavalcanti; Anna Carolina Paixao; Elisa Cavalcante Pereira; Fernando Motta; Luciana Appolinario; Marilda Siqueira on behalf of the Fiocruz COVID-19 Genomic Surveillance Network; Mia Ferreira de Araujo; Paola Resende; Renata Serrano Lopes; Taina Venas                                                                                                                                                                                                                                                                                                                                                                                                                                                                                                                                                                                                                                                                                                                                                                                                                                                                                                                                                                                                                                                                                                                                                                                                                                                                                                                                                                            |
| EPI_ISL_2549741, EPI_ISL_2757931, EPI_ISL_2812651, EPI_ISL_2812971, EPI_ISL_2854048                                                                                                                                                                                                                                                                                                                                                                                                                                                                                                                                                                                                                                                                                                                                                                                                                                                                                                                                                                                                                                                                                                                                                                                                                                                                                                                                                                                                                                                                                                                                                                                                                                                                                                                                                                                                                                                          | Labuan Hospital                                                                                            | Institute for Medical Research, Infectious Disease Research Centre, National Institutes of Health, Ministry of Health Malaysia                                                                                                 | Anasir MI; Azizan MA; Kamel K; Mohd Zawawi Z; Ramly N; Robert F; Suppiah J; Thayan R                                                                                                                                                                                                                                                                                                                                                                                                                                                                                                                                                                                                                                                                                                                                                                                                                                                                                                                                                                                                                                                                                                                                                                                                                                                                                                                                                                                                                                                                                                                                                                                                                                                          |
| EPI_ISL_2760153, EPI_ISL_2760176, EPI_ISL_2761649                                                                                                                                                                                                                                                                                                                                                                                                                                                                                                                                                                                                                                                                                                                                                                                                                                                                                                                                                                                                                                                                                                                                                                                                                                                                                                                                                                                                                                                                                                                                                                                                                                                                                                                                                                                                                                                                                            | Landesgesundheitsamt Baden-Württemberg                                                                     | Robert Koch Institute                                                                                                                                                                                                          |                                                                                                                                                                                                                                                                                                                                                                                                                                                                                                                                                                                                                                                                                                                                                                                                                                                                                                                                                                                                                                                                                                                                                                                                                                                                                                                                                                                                                                                                                                                                                                                                                                                                                                                                               |
| EPI_ISL_2876037                                                                                                                                                                                                                                                                                                                                                                                                                                                                                                                                                                                                                                                                                                                                                                                                                                                                                                                                                                                                                                                                                                                                                                                                                                                                                                                                                                                                                                                                                                                                                                                                                                                                                                                                                                                                                                                                                                                              | Laverty Pathology                                                                                          | NSW Health Pathology - Institute of Clinical Pathology and Medical Research; Westmead Hospital; University of Sydney                                                                                                           | CIDM-PH et al.                                                                                                                                                                                                                                                                                                                                                                                                                                                                                                                                                                                                                                                                                                                                                                                                                                                                                                                                                                                                                                                                                                                                                                                                                                                                                                                                                                                                                                                                                                                                                                                                                                                                                                                                |

|                                                                                                                                                                                                                                                                                                                                                                                                                                                                                                                                                                                                                                                                                                                                                                                                                                                                                                                                                                                                                                                                                                                                                                                                                                                                                                                                                                                                                                                                                                                                                                                                                                                                                                                                                                                                                                                                                                                                                                                                                                                                                                                                                                                                                                                                                                                                                                                                                                                                                                                               |                                                                                                          |                                                                                             |                                                                                                                                                                                                                                                                                                                                                                                                                                    |
|-------------------------------------------------------------------------------------------------------------------------------------------------------------------------------------------------------------------------------------------------------------------------------------------------------------------------------------------------------------------------------------------------------------------------------------------------------------------------------------------------------------------------------------------------------------------------------------------------------------------------------------------------------------------------------------------------------------------------------------------------------------------------------------------------------------------------------------------------------------------------------------------------------------------------------------------------------------------------------------------------------------------------------------------------------------------------------------------------------------------------------------------------------------------------------------------------------------------------------------------------------------------------------------------------------------------------------------------------------------------------------------------------------------------------------------------------------------------------------------------------------------------------------------------------------------------------------------------------------------------------------------------------------------------------------------------------------------------------------------------------------------------------------------------------------------------------------------------------------------------------------------------------------------------------------------------------------------------------------------------------------------------------------------------------------------------------------------------------------------------------------------------------------------------------------------------------------------------------------------------------------------------------------------------------------------------------------------------------------------------------------------------------------------------------------------------------------------------------------------------------------------------------------|----------------------------------------------------------------------------------------------------------|---------------------------------------------------------------------------------------------|------------------------------------------------------------------------------------------------------------------------------------------------------------------------------------------------------------------------------------------------------------------------------------------------------------------------------------------------------------------------------------------------------------------------------------|
| EPI_ISL_2443545,<br>EPI_ISL_2863898,<br>EPI_ISL_2863899                                                                                                                                                                                                                                                                                                                                                                                                                                                                                                                                                                                                                                                                                                                                                                                                                                                                                                                                                                                                                                                                                                                                                                                                                                                                                                                                                                                                                                                                                                                                                                                                                                                                                                                                                                                                                                                                                                                                                                                                                                                                                                                                                                                                                                                                                                                                                                                                                                                                       | Laboratorio Central de Saude Publica do Estado do Parana (LACEN/PR)                                      | Laboratory of Respiratory Viruses and Measles, Oswaldo Cruz Institute, FIOCRUZ              | Agatha Cristinne Prudencio Soares; Alice Sampaio Rocha; Ana Carolina Mendonca; Anna Carolina Paixao; Elisa Cavalcante Pereira; Fernando Motta; Igor Leonardo Arantes Gomes; Irina Riediger; Luciana Appolinario; Marilda Siqueira on behalf of the Fiocruz COVID-19 Genomic Surveillance Network; Paola Resende; Renata Serrano Lopes; Taina Venas                                                                                 |
| EPI_ISL_2726890,<br>EPI_ISL_2726902,<br>EPI_ISL_2726908,<br>EPI_ISL_2726927,<br>EPI_ISL_2757892                                                                                                                                                                                                                                                                                                                                                                                                                                                                                                                                                                                                                                                                                                                                                                                                                                                                                                                                                                                                                                                                                                                                                                                                                                                                                                                                                                                                                                                                                                                                                                                                                                                                                                                                                                                                                                                                                                                                                                                                                                                                                                                                                                                                                                                                                                                                                                                                                               | Lifebrian Covid Labor GmbH                                                                               | Dept. of Laboratory Medicine                                                                | Anna Gschaidler; Claudia Weber; Fabian Konig; Harald Esterbauer; Oswald Wagner; Petra Jurkowsitch; Robert Strassi; Sabina Plumer                                                                                                                                                                                                                                                                                                   |
| EPI_ISL_1740600, EPI_ISL_1912394, EPI_ISL_2091885, EPI_ISL_2199493, EPI_ISL_2199674, EPI_ISL_2236171, EPI_ISL_2317926, EPI_ISL_2318182, EPI_ISL_2347592, EPI_ISL_2347947, EPI_ISL_2348170, EPI_ISL_2348275, EPI_ISL_2353281, EPI_ISL_2353636, EPI_ISL_2353729, EPI_ISL_2366308, EPI_ISL_2393585, EPI_ISL_2394111, EPI_ISL_2396034, EPI_ISL_2435533, EPI_ISL_2435620, EPI_ISL_2435902, EPI_ISL_2436040, EPI_ISL_2437787, EPI_ISL_2446668, EPI_ISL_2447199, EPI_ISL_2468602, EPI_ISL_2468758, EPI_ISL_2487769, EPI_ISL_2511936, EPI_ISL_2513758, EPI_ISL_2513884, EPI_ISL_2514305, EPI_ISL_2515752, EPI_ISL_2537860, EPI_ISL_2538118, EPI_ISL_2539030, EPI_ISL_2553836, EPI_ISL_2569651, EPI_ISL_2569918, EPI_ISL_2570089, EPI_ISL_2606832, EPI_ISL_2606977, EPI_ISL_2639449, EPI_ISL_2639662, EPI_ISL_2640821, EPI_ISL_2664651, EPI_ISL_2701398, EPI_ISL_2703466, EPI_ISL_2703688, EPI_ISL_2704345, EPI_ISL_2718080, EPI_ISL_2718495, EPI_ISL_2729441, EPI_ISL_2780366, EPI_ISL_2781804, EPI_ISL_2807659, EPI_ISL_2831557, EPI_ISL_2846626, EPI_ISL_2847615, EPI_ISL_2848064, EPI_ISL_2853339                                                                                                                                                                                                                                                                                                                                                                                                                                                                                                                                                                                                                                                                                                                                                                                                                                                                                                                                                                                                                                                                                                                                                                                                                                                                                                                                                                                                                                  | Lighthouse Lab in Alderley Park                                                                          | Wellcome Sanger Institute for the COVID-19 Genomics UK (COG-UK) Consortium                  | Cordelia Langford; David K. Jackson; Dominic Kwiatkowski; Ewan Harrison; Ian Johnston; Jacquelyn Wynn; Jeffrey Barrett; John Sillitoe on behalf of the Wellcome Sanger Institute COVID-19 Surveillance Team; Mairead Hyland; Roberto Amato; Sonia Goncalves; The Lighthouse Lab in Alderley Park and Alex Alderton                                                                                                                 |
| EPI_ISL_1635379,<br>EPI_ISL_1635400,<br>EPI_ISL_1673100                                                                                                                                                                                                                                                                                                                                                                                                                                                                                                                                                                                                                                                                                                                                                                                                                                                                                                                                                                                                                                                                                                                                                                                                                                                                                                                                                                                                                                                                                                                                                                                                                                                                                                                                                                                                                                                                                                                                                                                                                                                                                                                                                                                                                                                                                                                                                                                                                                                                       | Lighthouse Lab in Cambridge                                                                              | Wellcome Sanger Institute for the COVID-19 Genomics UK (COG-UK) Consortium                  | Cordelia Langford; David K. Jackson; Dominic Kwiatkowski; Ewan Harrison; Ian Johnston; Jeffrey Barrett; John Sillitoe on behalf of the Wellcome Sanger Institute COVID-19 Surveillance Team; Rob Howes; Roberto Amato; Sonia Goncalves; The Lighthouse Lab in Cambridge and Alex Alderton                                                                                                                                          |
| EPI_ISL_1635330, EPI_ISL_1741623, EPI_ISL_1741651, EPI_ISL_1741838, EPI_ISL_1806892, EPI_ISL_1829541, EPI_ISL_1830056, EPI_ISL_1830493, EPI_ISL_1831174, EPI_ISL_1912695, EPI_ISL_1912732, EPI_ISL_1939724, EPI_ISL_1939726, EPI_ISL_1939759, EPI_ISL_1939812, EPI_ISL_1987194, EPI_ISL_1987292, EPI_ISL_2021347, EPI_ISL_2022593, EPI_ISL_2022634, EPI_ISL_2022726, EPI_ISL_2022753, EPI_ISL_2092698, EPI_ISL_2092725, EPI_ISL_2092754, EPI_ISL_2210846, EPI_ISL_2122710, EPI_ISL_2122724, EPI_ISL_2122728, EPI_ISL_2122872, EPI_ISL_2152769, EPI_ISL_2152770, EPI_ISL_2152826, EPI_ISL_2152945, EPI_ISL_2153012, EPI_ISL_2198880, EPI_ISL_2199065, EPI_ISL_2199772, EPI_ISL_2199914, EPI_ISL_2199941, EPI_ISL_2199973, EPI_ISL_2235533, EPI_ISL_2235602, EPI_ISL_2236046, EPI_ISL_2236057, EPI_ISL_2236574, EPI_ISL_2236617, EPI_ISL_2237177, EPI_ISL_2237447, EPI_ISL_2237558, EPI_ISL_2237635, EPI_ISL_2237798, EPI_ISL_2238557, EPI_ISL_2275410, EPI_ISL_2275529, EPI_ISL_2275728, EPI_ISL_2316882, EPI_ISL_2317053, EPI_ISL_2317089, EPI_ISL_2318111, EPI_ISL_2318861, EPI_ISL_2318891, EPI_ISL_2353903, EPI_ISL_2353927, EPI_ISL_2353982, EPI_ISL_2354066, EPI_ISL_2354183, EPI_ISL_2354229, EPI_ISL_2354251, EPI_ISL_2354424, EPI_ISL_2395555, EPI_ISL_2395933, EPI_ISL_2396589, EPI_ISL_2407797, EPI_ISL_2407834, EPI_ISL_2407991, EPI_ISL_2436273, EPI_ISL_2438364, EPI_ISL_2438383, EPI_ISL_2438405, EPI_ISL_2438479, EPI_ISL_2447184, EPI_ISL_2457698, EPI_ISL_2457855, EPI_ISL_2469212, EPI_ISL_2487409, EPI_ISL_2488201, EPI_ISL_2488548, EPI_ISL_2513301, EPI_ISL_2514806, EPI_ISL_2542016, EPI_ISL_2543427, EPI_ISL_2552179, EPI_ISL_2553165, EPI_ISL_2553295, EPI_ISL_2553595, EPI_ISL_2554942, EPI_ISL_2554970, EPI_ISL_2555313, EPI_ISL_2555445, EPI_ISL_2555477, EPI_ISL_2568078, EPI_ISL_2607438, EPI_ISL_2607620, EPI_ISL_2608271, EPI_ISL_2639961, EPI_ISL_2639994, EPI_ISL_2641060, EPI_ISL_2641542, EPI_ISL_2651657, EPI_ISL_2651718, EPI_ISL_2682045, EPI_ISL_2682769, EPI_ISL_2683409, EPI_ISL_2683425, EPI_ISL_2701356, EPI_ISL_2701545, EPI_ISL_2718357, EPI_ISL_2729087, EPI_ISL_2730481, EPI_ISL_2730746, EPI_ISL_2730952, EPI_ISL_2731037, EPI_ISL_2731265, EPI_ISL_2807332, EPI_ISL_2807339, EPI_ISL_2807757, EPI_ISL_2808893, EPI_ISL_2808924, EPI_ISL_2814286, EPI_ISL_2815060, EPI_ISL_2815316, EPI_ISL_2846975, EPI_ISL_2850154, EPI_ISL_2850977, EPI_ISL_2852018, EPI_ISL_2852711, EPI_ISL_2852746, EPI_ISL_2852768, EPI_ISL_2853047, EPI_ISL_2866753, EPI_ISL_2866904, EPI_ISL_2868180 | Lighthouse Lab in Glasgow                                                                                | Wellcome Sanger Institute for the COVID-19 Genomics UK (COG-UK) Consortium                  | Anna Dominiczak and Alex Alderton; Carol Clugston; Cordelia Langford; David Gray; David K. Jackson; Dominic Kwiatkowski; Ewan Harrison; Harper VanSteenhouse; Ian Johnston; Jeffrey Barrett; John Sillitoe on behalf of the Wellcome Sanger Institute COVID-19 Surveillance Team; Roberto Amato; Sonia Goncalves; Yumi Kasai                                                                                                       |
| EPI_ISL_1806899, EPI_ISL_1806900, EPI_ISL_1806901, EPI_ISL_1806902, EPI_ISL_1806903, EPI_ISL_1829280, EPI_ISL_1921531, EPI_ISL_1985465, EPI_ISL_1986101, EPI_ISL_2022513, EPI_ISL_2022526, EPI_ISL_2022579, EPI_ISL_2120630, EPI_ISL_2121509, EPI_ISL_2138079, EPI_ISL_2152660, EPI_ISL_2198679, EPI_ISL_2236648, EPI_ISL_2236708, EPI_ISL_2275042, EPI_ISL_2316846, EPI_ISL_2347151, EPI_ISL_2353024, EPI_ISL_2366269, EPI_ISL_2392623, EPI_ISL_2437783, EPI_ISL_2437794, EPI_ISL_2447124, EPI_ISL_2468416, EPI_ISL_2514892, EPI_ISL_2570290, EPI_ISL_2606707, EPI_ISL_2663822, EPI_ISL_2663980, EPI_ISL_2664174, EPI_ISL_2664249, EPI_ISL_2664309, EPI_ISL_2664412, EPI_ISL_2700280, EPI_ISL_2700550, EPI_ISL_2703721, EPI_ISL_2729913, EPI_ISL_2730406, EPI_ISL_2766895, EPI_ISL_2767422, EPI_ISL_2779905, EPI_ISL_2782067, EPI_ISL_2809414, EPI_ISL_2813208, EPI_ISL_2813843, EPI_ISL_2814025, EPI_ISL_2829177, EPI_ISL_2829939, EPI_ISL_2847738, EPI_ISL_2848384, EPI_ISL_2848935                                                                                                                                                                                                                                                                                                                                                                                                                                                                                                                                                                                                                                                                                                                                                                                                                                                                                                                                                                                                                                                                                                                                                                                                                                                                                                                                                                                                                                                                                                                                        | Lighthouse Lab in Milton Keynes                                                                          | Wellcome Sanger Institute for the COVID-19 Genomics UK (COG-UK) Consortium                  | Cordelia Langford; David K. Jackson; Dominic Kwiatkowski; Ewan Harrison; Ian Johnston; Jeffrey Barrett; John Sillitoe on behalf of the Wellcome Sanger Institute COVID-19 Surveillance Team; Roberto Amato; Sonia Goncalves; The Lighthouse Lab in Milton Keynes and Alex Alderton                                                                                                                                                 |
| EPI_ISL_2485422, EPI_ISL_2515896, EPI_ISL_2568930, EPI_ISL_2607022, EPI_ISL_2638459, EPI_ISL_2651497, EPI_ISL_2664830, EPI_ISL_2767580, EPI_ISL_2804003, EPI_ISL_2808309, EPI_ISL_2813568, EPI_ISL_2828866, EPI_ISL_2830722, EPI_ISL_2831905, EPI_ISL_2849733, EPI_ISL_2849817                                                                                                                                                                                                                                                                                                                                                                                                                                                                                                                                                                                                                                                                                                                                                                                                                                                                                                                                                                                                                                                                                                                                                                                                                                                                                                                                                                                                                                                                                                                                                                                                                                                                                                                                                                                                                                                                                                                                                                                                                                                                                                                                                                                                                                                | Lighthouse Laboratory Plymouth                                                                           | Wellcome Sanger Institute for the COVID-19 Genomics UK (COG-UK) Consortium                  | Cordelia Langford; David K. Jackson; Dominic Kwiatkowski; Ewan Harrison; Ian Johnston; Jeffrey Barrett; John Sillitoe on behalf of the Wellcome Sanger Institute COVID-19 Surveillance Team; Lighthouse Laboratory Plymouth and Alex Alderton; Roberto Amato; Sonia Goncalves                                                                                                                                                      |
| EPI_ISL_1727471,<br>EPI_ISL_2470670,<br>EPI_ISL_2470684,<br>EPI_ISL_2632723,<br>EPI_ISL_2845055                                                                                                                                                                                                                                                                                                                                                                                                                                                                                                                                                                                                                                                                                                                                                                                                                                                                                                                                                                                                                                                                                                                                                                                                                                                                                                                                                                                                                                                                                                                                                                                                                                                                                                                                                                                                                                                                                                                                                                                                                                                                                                                                                                                                                                                                                                                                                                                                                               | Limbach - MVZ Humangenetik Ulm                                                                           | Robert Koch Institute                                                                       |                                                                                                                                                                                                                                                                                                                                                                                                                                    |
| EPI_ISL_2495622, EPI_ISL_2495623, EPI_ISL_2495624, EPI_ISL_2495625, EPI_ISL_2495626, EPI_ISL_2495627, EPI_ISL_2495633, EPI_ISL_2495635, EPI_ISL_2495636, EPI_ISL_2495648, EPI_ISL_2495653, EPI_ISL_2495654, EPI_ISL_2495655, EPI_ISL_2495660, EPI_ISL_2495661, EPI_ISL_2495664                                                                                                                                                                                                                                                                                                                                                                                                                                                                                                                                                                                                                                                                                                                                                                                                                                                                                                                                                                                                                                                                                                                                                                                                                                                                                                                                                                                                                                                                                                                                                                                                                                                                                                                                                                                                                                                                                                                                                                                                                                                                                                                                                                                                                                                | MB-Cadham Provincial laboratory                                                                          | National Microbiology Laboratory (NML)                                                      | Anna Majer; Anneliese Landgraff; CanCOGE'n's metadata curation team; Darian Hole; David Alexander; Elsie Grudeski; Gary Van Domselaar; Grace Seo; Jared Bullard; Jennifer Tanner; Kerry Dust; Kirsten Biggar; Madison Chapel; Morag Graham; Natalie Knox; Nathalie Bastien; Paul Van Caeseele; Philip Mabon; Public Health Agency of Canada CanCOGE'n team; Rhannon Huzarewicz; Russell Mandes; Shari Tyson; Timothy Booth; Yan Li |
| EPI_ISL_2689109                                                                                                                                                                                                                                                                                                                                                                                                                                                                                                                                                                                                                                                                                                                                                                                                                                                                                                                                                                                                                                                                                                                                                                                                                                                                                                                                                                                                                                                                                                                                                                                                                                                                                                                                                                                                                                                                                                                                                                                                                                                                                                                                                                                                                                                                                                                                                                                                                                                                                                               | MD PHL                                                                                                   | MD PHL                                                                                      | Maryland Department of Health Laboratories Administration                                                                                                                                                                                                                                                                                                                                                                          |
| EPI_ISL_2471954,<br>EPI_ISL_2471969,<br>EPI_ISL_2635834,<br>EPI_ISL_2845985                                                                                                                                                                                                                                                                                                                                                                                                                                                                                                                                                                                                                                                                                                                                                                                                                                                                                                                                                                                                                                                                                                                                                                                                                                                                                                                                                                                                                                                                                                                                                                                                                                                                                                                                                                                                                                                                                                                                                                                                                                                                                                                                                                                                                                                                                                                                                                                                                                                   | MDI Limbach Berlin GmbH; MVZ Labor Berlin                                                                | Robert Koch Institute                                                                       |                                                                                                                                                                                                                                                                                                                                                                                                                                    |
| EPI_ISL_2894130                                                                                                                                                                                                                                                                                                                                                                                                                                                                                                                                                                                                                                                                                                                                                                                                                                                                                                                                                                                                                                                                                                                                                                                                                                                                                                                                                                                                                                                                                                                                                                                                                                                                                                                                                                                                                                                                                                                                                                                                                                                                                                                                                                                                                                                                                                                                                                                                                                                                                                               | MEDILAB                                                                                                  | CHU Poitiers                                                                                | Agnes BEBY-DEFAUX; Birama N'DIAYE; Caroline MICHAUD; Magali GARCIA; Manon PRAT; Maxime PICHON; Nicolas LEVEQUE; Valentin BON-BARET                                                                                                                                                                                                                                                                                                 |
| EPI_ISL_2727597,<br>EPI_ISL_2727600,<br>EPI_ISL_2727602                                                                                                                                                                                                                                                                                                                                                                                                                                                                                                                                                                                                                                                                                                                                                                                                                                                                                                                                                                                                                                                                                                                                                                                                                                                                                                                                                                                                                                                                                                                                                                                                                                                                                                                                                                                                                                                                                                                                                                                                                                                                                                                                                                                                                                                                                                                                                                                                                                                                       | MEPHI, Aix Marseille University                                                                          | MEPHI, Aix Marseille University                                                             | Anthony LEVASSEUR                                                                                                                                                                                                                                                                                                                                                                                                                  |
| EPI_ISL_1663548,<br>EPI_ISL_1663549                                                                                                                                                                                                                                                                                                                                                                                                                                                                                                                                                                                                                                                                                                                                                                                                                                                                                                                                                                                                                                                                                                                                                                                                                                                                                                                                                                                                                                                                                                                                                                                                                                                                                                                                                                                                                                                                                                                                                                                                                                                                                                                                                                                                                                                                                                                                                                                                                                                                                           | MGM Medical College, Jamshehpur                                                                          | Institute of Life Sciences - INSACOG                                                        | Ajay Parida; Amol M. Kanampaliwar; Arup Ghosh; Atmukta Jha; INSACOG Consortium; Punit Prasad; Rajeeb Swain; Rupesh Dash; Safal Walia; Shifu Aggarwal; Sunil K. Raghav                                                                                                                                                                                                                                                              |
| EPI_ISL_2016024,<br>EPI_ISL_2373878,<br>EPI_ISL_2373880,<br>EPI_ISL_2373881,<br>EPI_ISL_2626465,<br>EPI_ISL_2676784                                                                                                                                                                                                                                                                                                                                                                                                                                                                                                                                                                                                                                                                                                                                                                                                                                                                                                                                                                                                                                                                                                                                                                                                                                                                                                                                                                                                                                                                                                                                                                                                                                                                                                                                                                                                                                                                                                                                                                                                                                                                                                                                                                                                                                                                                                                                                                                                           | MIRIALIS CLUSES BECHET                                                                                   | CNR Virus des Infections Respiratoires - France SUD                                         | Antonin Bal; Bruno Lina; Gregory Destras; Gwendolynne Burfin; Hadrien Regue; Laurence Josset; Martine Valette; Quentin Semanas                                                                                                                                                                                                                                                                                                     |
| EPI_ISL_2689637                                                                                                                                                                                                                                                                                                                                                                                                                                                                                                                                                                                                                                                                                                                                                                                                                                                                                                                                                                                                                                                                                                                                                                                                                                                                                                                                                                                                                                                                                                                                                                                                                                                                                                                                                                                                                                                                                                                                                                                                                                                                                                                                                                                                                                                                                                                                                                                                                                                                                                               | MLD Szpital Św. Elżbiety                                                                                 | National Institute of Public Health - National Institute of Hygiene                         | Gierczyński Rafał; Sadkowska-Todys Małgorzata; Wołkowicz Tomasz; Zacharczuk Katarzyna                                                                                                                                                                                                                                                                                                                                              |
| EPI_ISL_2615399, EPI_ISL_2759093, EPI_ISL_2763624, EPI_ISL_2833731, EPI_ISL_2833734, EPI_ISL_2833738, EPI_ISL_2833739                                                                                                                                                                                                                                                                                                                                                                                                                                                                                                                                                                                                                                                                                                                                                                                                                                                                                                                                                                                                                                                                                                                                                                                                                                                                                                                                                                                                                                                                                                                                                                                                                                                                                                                                                                                                                                                                                                                                                                                                                                                                                                                                                                                                                                                                                                                                                                                                         | MOH - Jaber Al-Ahmad Hospital (Innovation Research Laboratory)                                           | MOH - Jaber Al-Ahmad Hospital (Innovation Research Laboratory)                              | Mohammad Alghounaim; Salman Al-Sabah                                                                                                                                                                                                                                                                                                                                                                                               |
| EPI_ISL_1970565,<br>EPI_ISL_1970566,<br>EPI_ISL_1970567,<br>EPI_ISL_1970568                                                                                                                                                                                                                                                                                                                                                                                                                                                                                                                                                                                                                                                                                                                                                                                                                                                                                                                                                                                                                                                                                                                                                                                                                                                                                                                                                                                                                                                                                                                                                                                                                                                                                                                                                                                                                                                                                                                                                                                                                                                                                                                                                                                                                                                                                                                                                                                                                                                   | MRC/UJRI & LSHTM Uganda Research Unit                                                                    | MRC/UJRI & LSHTM Uganda Research Unit                                                       | Dan Lule Bugembe; Isaac Sseeewanyana; Matthew Cotten; My V.T. Phan; Patrick Semanda; Pontiano Kaleebu; Susan Nabadda                                                                                                                                                                                                                                                                                                               |
| EPI_ISL_2690479, EPI_ISL_2690480, EPI_ISL_2690481, EPI_ISL_2690482, EPI_ISL_2690483, EPI_ISL_2690484, EPI_ISL_2690485, EPI_ISL_2690486, EPI_ISL_2690487, EPI_ISL_2690488, EPI_ISL_2690489, EPI_ISL_2690490, EPI_ISL_2690491, EPI_ISL_2690492, EPI_ISL_2690493, EPI_ISL_2690494, EPI_ISL_2690495, EPI_ISL_2690496, EPI_ISL_2690497, EPI_ISL_2690498, EPI_ISL_2690499, EPI_ISL_2690500, EPI_ISL_2690502, EPI_ISL_2690503, EPI_ISL_2690504, EPI_ISL_2690505, EPI_ISL_2690506, EPI_ISL_2690507, EPI_ISL_2690508, EPI_ISL_2690509, EPI_ISL_2690510, EPI_ISL_2690511, EPI_ISL_2690512, EPI_ISL_2690513                                                                                                                                                                                                                                                                                                                                                                                                                                                                                                                                                                                                                                                                                                                                                                                                                                                                                                                                                                                                                                                                                                                                                                                                                                                                                                                                                                                                                                                                                                                                                                                                                                                                                                                                                                                                                                                                                                                              | MRC/UJRI & LSHTM Uganda Research Unit, Central Public Health Laboratories, Rakai Health Sciences Program | MRC/UJRI & LSHTM Uganda Research Unit, Central Public Health Laboratories                   | Dan Lule Bugembe; Hellen Nansumba; Isaac Sseeewanyana; Matthew Cotten; My V.T. Phan; Patrick Semanda; Pontiano Kaleebu; Susan Nabadda                                                                                                                                                                                                                                                                                              |
| EPI_ISL_2313256,<br>EPI_ISL_2469893                                                                                                                                                                                                                                                                                                                                                                                                                                                                                                                                                                                                                                                                                                                                                                                                                                                                                                                                                                                                                                                                                                                                                                                                                                                                                                                                                                                                                                                                                                                                                                                                                                                                                                                                                                                                                                                                                                                                                                                                                                                                                                                                                                                                                                                                                                                                                                                                                                                                                           | MVZ Dr. Eberhard & Partner Dortmund                                                                      | Robert Koch Institute                                                                       |                                                                                                                                                                                                                                                                                                                                                                                                                                    |
| EPI_ISL_2111238                                                                                                                                                                                                                                                                                                                                                                                                                                                                                                                                                                                                                                                                                                                                                                                                                                                                                                                                                                                                                                                                                                                                                                                                                                                                                                                                                                                                                                                                                                                                                                                                                                                                                                                                                                                                                                                                                                                                                                                                                                                                                                                                                                                                                                                                                                                                                                                                                                                                                                               | MVZ Labor Dr. Fenner und Kollegen (Standort Hamburg)                                                     | Robert Koch Institute                                                                       |                                                                                                                                                                                                                                                                                                                                                                                                                                    |
| EPI_ISL_1847444, EPI_ISL_1852081, EPI_ISL_2264588, EPI_ISL_2388139, EPI_ISL_2388159, EPI_ISL_2471905, EPI_ISL_2845215                                                                                                                                                                                                                                                                                                                                                                                                                                                                                                                                                                                                                                                                                                                                                                                                                                                                                                                                                                                                                                                                                                                                                                                                                                                                                                                                                                                                                                                                                                                                                                                                                                                                                                                                                                                                                                                                                                                                                                                                                                                                                                                                                                                                                                                                                                                                                                                                         | see above                                                                                                | Robert Koch Institute                                                                       |                                                                                                                                                                                                                                                                                                                                                                                                                                    |
| EPI_ISL_2261471                                                                                                                                                                                                                                                                                                                                                                                                                                                                                                                                                                                                                                                                                                                                                                                                                                                                                                                                                                                                                                                                                                                                                                                                                                                                                                                                                                                                                                                                                                                                                                                                                                                                                                                                                                                                                                                                                                                                                                                                                                                                                                                                                                                                                                                                                                                                                                                                                                                                                                               | MVZ Labor Dr. Quade & Kollegen GmbH                                                                      | Robert Koch Institute                                                                       |                                                                                                                                                                                                                                                                                                                                                                                                                                    |
| EPI_ISL_2115263                                                                                                                                                                                                                                                                                                                                                                                                                                                                                                                                                                                                                                                                                                                                                                                                                                                                                                                                                                                                                                                                                                                                                                                                                                                                                                                                                                                                                                                                                                                                                                                                                                                                                                                                                                                                                                                                                                                                                                                                                                                                                                                                                                                                                                                                                                                                                                                                                                                                                                               | MVZ Labor Krone GbR                                                                                      | Robert Koch Institute                                                                       |                                                                                                                                                                                                                                                                                                                                                                                                                                    |
| EPI_ISL_1850317,<br>EPI_ISL_2314690,<br>EPI_ISL_2316449,<br>EPI_ISL_2845978                                                                                                                                                                                                                                                                                                                                                                                                                                                                                                                                                                                                                                                                                                                                                                                                                                                                                                                                                                                                                                                                                                                                                                                                                                                                                                                                                                                                                                                                                                                                                                                                                                                                                                                                                                                                                                                                                                                                                                                                                                                                                                                                                                                                                                                                                                                                                                                                                                                   | MVZ Medizinisches Labor Hannover GmbH                                                                    | Robert Koch Institute                                                                       |                                                                                                                                                                                                                                                                                                                                                                                                                                    |
| EPI_ISL_2471593                                                                                                                                                                                                                                                                                                                                                                                                                                                                                                                                                                                                                                                                                                                                                                                                                                                                                                                                                                                                                                                                                                                                                                                                                                                                                                                                                                                                                                                                                                                                                                                                                                                                                                                                                                                                                                                                                                                                                                                                                                                                                                                                                                                                                                                                                                                                                                                                                                                                                                               | MVZ für Laboratoriumsmedizin und Mikrobiologie Koblenz-Mittelrhein (Labor Koblenz)                       | Robert Koch Institute                                                                       |                                                                                                                                                                                                                                                                                                                                                                                                                                    |
| EPI_ISL_2450977, EPI_ISL_2647143, EPI_ISL_2647413, EPI_ISL_2647679, EPI_ISL_2647870, EPI_ISL_2786039, EPI_ISL_2786072, EPI_ISL_2786395, EPI_ISL_2875234, EPI_ISL_2875278                                                                                                                                                                                                                                                                                                                                                                                                                                                                                                                                                                                                                                                                                                                                                                                                                                                                                                                                                                                                                                                                                                                                                                                                                                                                                                                                                                                                                                                                                                                                                                                                                                                                                                                                                                                                                                                                                                                                                                                                                                                                                                                                                                                                                                                                                                                                                      | see above                                                                                                | Centers for Disease Control and Prevention Division of Viral Diseases, Pathogen Discovery   | Adrian Paskey; Benjamin Rambo-Martin; Christopher Gulwicz; Clinton R. Paden; Dakota Howard; Darlene Wagner; Dhvani Batra; Duncan MacCannell; Jason Caravas; Kara Moser; Lauren Moon; Matthew Schmerer; Matthew Tugwell; Peter W. Cook; Scott Sammons; Shatavia Morrison; Yvette Unoarumhi                                                                                                                                          |
| EPI_ISL_2360253                                                                                                                                                                                                                                                                                                                                                                                                                                                                                                                                                                                                                                                                                                                                                                                                                                                                                                                                                                                                                                                                                                                                                                                                                                                                                                                                                                                                                                                                                                                                                                                                                                                                                                                                                                                                                                                                                                                                                                                                                                                                                                                                                                                                                                                                                                                                                                                                                                                                                                               | Maku Molecular Laboratory                                                                                | National Influenza Center                                                                   | A Nejadi; F Ajaminejad and T Mokhtari Azad; J Yavarian; K Sadeghi; N Ghavvami; NZ Shafiei Jandaghi; V Salimi                                                                                                                                                                                                                                                                                                                       |
| EPI_ISL_2501834                                                                                                                                                                                                                                                                                                                                                                                                                                                                                                                                                                                                                                                                                                                                                                                                                                                                                                                                                                                                                                                                                                                                                                                                                                                                                                                                                                                                                                                                                                                                                                                                                                                                                                                                                                                                                                                                                                                                                                                                                                                                                                                                                                                                                                                                                                                                                                                                                                                                                                               | Maryland Genomics, Institute for Genome Sciences, University of Maryland School of Medicine              | Maryland Genomics, Institute for Genome Sciences, University of Maryland School of Medicine | Claire M; Fraser; Hazen; Holly; Humphrys; Ivette; Jacques; Jonathan; Kranthi; Lim; Lisa D; Luke J; Mike; Ott; Ravel; Rousey; Sadzewicz; Sandra; Santana-Cruz; Tallon; Tracy; Vavikolanu                                                                                                                                                                                                                                            |
| EPI_ISL_2008369                                                                                                                                                                                                                                                                                                                                                                                                                                                                                                                                                                                                                                                                                                                                                                                                                                                                                                                                                                                                                                                                                                                                                                                                                                                                                                                                                                                                                                                                                                                                                                                                                                                                                                                                                                                                                                                                                                                                                                                                                                                                                                                                                                                                                                                                                                                                                                                                                                                                                                               | Massachusetts State Public Health Laboratory                                                             | Massachusetts State Public Health Laboratory                                                | Andrew Lang; Glen Gallagher; Sandra Smole; Timelia Fink                                                                                                                                                                                                                                                                                                                                                                            |
| EPI_ISL_2006677,<br>EPI_ISL_2095274,                                                                                                                                                                                                                                                                                                                                                                                                                                                                                                                                                                                                                                                                                                                                                                                                                                                                                                                                                                                                                                                                                                                                                                                                                                                                                                                                                                                                                                                                                                                                                                                                                                                                                                                                                                                                                                                                                                                                                                                                                                                                                                                                                                                                                                                                                                                                                                                                                                                                                          | Max von Pettenkofer Institute, Virology, National Reference Center for Retroviruses, LMU Munich          | Laboratory for Functional Genome Analysis; Dept. Genomics; Gene Center of the LMU Munich    | Alexander Graf; Helmut Blum; Max Muenchhoff; Oliver Keppler; Stefan Krebs                                                                                                                                                                                                                                                                                                                                                          |

|                                                                                                                                                                                                                                                                                                                                                                                                                                                                                                                                                                |                                                                                                                                                                                                                |                                                                                                                                                                                                                                |                                                                                                                                                                                                                                                                                                                                                                                                                                                                                                                                                                                                                                                   |
|----------------------------------------------------------------------------------------------------------------------------------------------------------------------------------------------------------------------------------------------------------------------------------------------------------------------------------------------------------------------------------------------------------------------------------------------------------------------------------------------------------------------------------------------------------------|----------------------------------------------------------------------------------------------------------------------------------------------------------------------------------------------------------------|--------------------------------------------------------------------------------------------------------------------------------------------------------------------------------------------------------------------------------|---------------------------------------------------------------------------------------------------------------------------------------------------------------------------------------------------------------------------------------------------------------------------------------------------------------------------------------------------------------------------------------------------------------------------------------------------------------------------------------------------------------------------------------------------------------------------------------------------------------------------------------------------|
| EPI_ISL_2095280, EPI_ISL_2450280                                                                                                                                                                                                                                                                                                                                                                                                                                                                                                                               |                                                                                                                                                                                                                |                                                                                                                                                                                                                                |                                                                                                                                                                                                                                                                                                                                                                                                                                                                                                                                                                                                                                                   |
| EPI_ISL_2389360                                                                                                                                                                                                                                                                                                                                                                                                                                                                                                                                                | Med. Labor Prof. Schenck Dr. Ansonge & Kollegen                                                                                                                                                                | Robert Koch Institute                                                                                                                                                                                                          |                                                                                                                                                                                                                                                                                                                                                                                                                                                                                                                                                                                                                                                   |
| EPI_ISL_2360242                                                                                                                                                                                                                                                                                                                                                                                                                                                                                                                                                | Medica                                                                                                                                                                                                         | Institute of Medical Virology                                                                                                                                                                                                  | Alexandra Trkola; Annette Audigé; Cyril Shah; Gabriela Ziltener; Guido Boemberg; Jon Huder; Jürg Böni; Kevin Steiner; Maria Grünberg; Maryam Zaheri; Michael Huber; Riccarda Capaul; Stefan Schmutz; Verena Kufner                                                                                                                                                                                                                                                                                                                                                                                                                                |
| EPI_ISL_2491569, EPI_ISL_2644691, EPI_ISL_2644706, EPI_ISL_2673739, EPI_ISL_2788597, EPI_ISL_2820869, EPI_ISL_2820870, EPI_ISL_2820871, EPI_ISL_2820888, EPI_ISL_2820913, EPI_ISL_2820917, EPI_ISL_2820919, EPI_ISL_2820933                                                                                                                                                                                                                                                                                                                                    | Medical Microbiology Unit. Department for Laboratory Medicine, Drammen Hospital, Vestre Viken Health Trust,                                                                                                    | Norwegian Institute of Public Health, Department of Virology                                                                                                                                                                   | Atiya R Ali; Debec Nadia; Engebretsen Serina Beate; Garcia Llorente Ignacio; Hilde Elshaug; Hilde Vollan; Jon Bråte; Kamilla Heddeland Instefjord; Karoline Bragstad; Kathrine Stene-Johansen; Line Victoria Moen; Marie Paulsen Madsen; Olav Hungnes; Pedersen Benedikte Nevjen; Rasmus Riis Kopperud                                                                                                                                                                                                                                                                                                                                            |
| EPI_ISL_2471761, EPI_ISL_2471770                                                                                                                                                                                                                                                                                                                                                                                                                                                                                                                               | Medizinisch-Diagnostisches Labor Kempten allgäulab                                                                                                                                                             | Robert Koch Institute                                                                                                                                                                                                          |                                                                                                                                                                                                                                                                                                                                                                                                                                                                                                                                                                                                                                                   |
| EPI_ISL_2116115, EPI_ISL_2129020                                                                                                                                                                                                                                                                                                                                                                                                                                                                                                                               | Medizinische Laboratorien Dusseldorf                                                                                                                                                                           | Robert Koch Institute                                                                                                                                                                                                          |                                                                                                                                                                                                                                                                                                                                                                                                                                                                                                                                                                                                                                                   |
| EPI_ISL_2389094, EPI_ISL_2389096                                                                                                                                                                                                                                                                                                                                                                                                                                                                                                                               | Medizinische Laboratorien Düsseldorf                                                                                                                                                                           | Robert Koch Institute                                                                                                                                                                                                          |                                                                                                                                                                                                                                                                                                                                                                                                                                                                                                                                                                                                                                                   |
| EPI_ISL_2318999, EPI_ISL_2348499                                                                                                                                                                                                                                                                                                                                                                                                                                                                                                                               | Megalab, Molecular and Cytogenetics Diagnostics                                                                                                                                                                | Department for Virology, Molecular Biology and Genome Research, R. G. Lugar Center for Public Health Research, National Center for Disease Control and Public Health (NCDC) of Georgia.                                        | Adam Kotorashvili; Amiran Gamkrelidze.; Ana Papkiauri; Ann Machabishvili; Anna Kasradze; Davit Tsaguria; Ekaterine Khmaladze; Ekaterine Zangaladze; Ekaterine Zhghenti; Giorgi Gogoladze; Giorgi Tomashvili; Gvantsa Brachveli; Gvantsa Chanturia; Irma Burjanadze; Ketevan Sidamonidze; Khatuna Zakhshvili; Lela Sabadze; Lela Urushadze; Magda Dgebadze; Maia Alkhazashvili; Mari Gavashelidze; Maria Zakalashvili; Marine Murtskhvaladze; Meri Pantsulaia; Nato Kotaria; Nino Berishvili; Nino Chikhovani; Paata Imnadze; Roena Sukhlishvili; Tamar Jashlishvili; Tata Imnadze; Tea Tvedoradze                                                 |
| EPI_ISL_2815327, EPI_ISL_2815328                                                                                                                                                                                                                                                                                                                                                                                                                                                                                                                               | Melaka Hospital                                                                                                                                                                                                | Institute for Medical Research, Infectious Disease Research Centre, National Institutes of Health, Ministry of Health Malaysia                                                                                                 | Azizan MA; Kamel K; Mohd Zawawi Z; Ramly N; Robert F; Suppliah J; Thayan R                                                                                                                                                                                                                                                                                                                                                                                                                                                                                                                                                                        |
| EPI_ISL_2372772, EPI_ISL_2650247                                                                                                                                                                                                                                                                                                                                                                                                                                                                                                                               | Microbiologia CATLAB                                                                                                                                                                                           | Can Ruti SARS-CoV-2 Sequencing Hub (HUGTIP/IrsiCaixa/IGTP)                                                                                                                                                                     | Alba Sánchez; Anna Not; Antoni E Bordoy; Bonaventura Clotet; Cristina Casañ; Cristina Esteban; Francesc Catala-Moll; Gemma Clara; Ignacio Blanco; Marc Noguera-Julian; Maria Casadellà; Mariona Parera; Mercedes Guerrero; Montserrat Giménez; Pere-Joan Cardona; Pilar Armengol; Roger Pared; Roger Paredes; Verónica Saludes; and Elisa Martró on behalf of the Can Ruti SARS-CoV-2 Sequencing Hub                                                                                                                                                                                                                                              |
| EPI_ISL_1913110, EPI_ISL_2405344, EPI_ISL_2482436, EPI_ISL_2482455, EPI_ISL_2598392                                                                                                                                                                                                                                                                                                                                                                                                                                                                            | Microbiological Diagnostic Unit - Public Health Laboratory (MDU-PHL)                                                                                                                                           | MDU-PHL                                                                                                                                                                                                                        | M.L.; N.L.; Sait; Seemann T.; Sherry                                                                                                                                                                                                                                                                                                                                                                                                                                                                                                                                                                                                              |
| EPI_ISL_2281283, EPI_ISL_2281368, EPI_ISL_2281401, EPI_ISL_2448056, EPI_ISL_2650197, EPI_ISL_2650310, EPI_ISL_2671366, EPI_ISL_2671422, EPI_ISL_2681567, EPI_ISL_2812461, EPI_ISL_2812518, EPI_ISL_2832152, EPI_ISL_2832227                                                                                                                                                                                                                                                                                                                                    | see above                                                                                                                                                                                                      | Microbiology Department, Laboratori Clínic Metropolitana Nord. Hospital Universitari Germans Trias i Pujol                                                                                                                     | Can Ruti SARS-CoV-2 Sequencing Hub (HUGTIP/IrsiCaixa/IGTP)                                                                                                                                                                                                                                                                                                                                                                                                                                                                                                                                                                                        |
| EPI_ISL_1999791                                                                                                                                                                                                                                                                                                                                                                                                                                                                                                                                                | Microbiology Department, Laboratori Clínic Metropolitana Nord. Hospital Universitari Germans Trias i Pujol.                                                                                                    | Can Ruti SARS-CoV-2 Sequencing Hub (HUGTIP/IrsiCaixa/IGTP)                                                                                                                                                                     | Alba Sánchez; Anna Not; Antoni E Bordoy; Bonaventura Clotet; Cristina Casa; Cristina Casañ; Cristina Esteban; David Panisello; Francesc Catala-Moll; Gemma Clara; Ignacio Blanco; Laia Soler; Lauro Sumoy; Marc Noguera-Julian; Maria Casadell; Maria Casadellà; Mariona Parera; Mercedes Guerrero; Montserrat Gimnez; Montserrat Giménez; Pere-Joan Cardona; Pilar Armengol; Roger Paredes; Vernica Saludes; Verónica Saludes; and Elisa Martr on behalf of the Can Ruti SARS-CoV-2 Sequencing Hub.; and Elisa Martró on behalf of the Can Ruti SARS-CoV-2 Sequencing Hub; and Elisa Martró on behalf of the Can Ruti SARS-CoV-2 Sequencing Hub. |
| EPI_ISL_2861321, EPI_ISL_2861322, EPI_ISL_2861323                                                                                                                                                                                                                                                                                                                                                                                                                                                                                                              | Microbiology Department, University Hospital Donostia                                                                                                                                                          | Microbiology Department, University Hospital Donostia                                                                                                                                                                          | Alba Sánchez; Anna Not; Antoni E Bordoy; Bonaventura Clotet; Cristina Casañ; Cristina Esteban; Francesc Catala-Moll; Gemma Clara; Ignacio Blanco; Marc Noguera-Julian; Maria Casadellà; Mariona Parera; Mercedes Guerrero; Montserrat Giménez; Pere-Joan Cardona; Pilar Armengol; Roger Paredes; Verónica Saludes; and Elisa Martró on behalf of the Can Ruti SARS-CoV-2 Sequencing Hub.                                                                                                                                                                                                                                                          |
| EPI_ISL_2086160, EPI_ISL_2501369, EPI_ISL_2501371, EPI_ISL_2501372, EPI_ISL_2501373, EPI_ISL_2501374, EPI_ISL_2861296, EPI_ISL_2861305, EPI_ISL_2861306, EPI_ISL_2861314, EPI_ISL_2864141                                                                                                                                                                                                                                                                                                                                                                      | see above                                                                                                                                                                                                      | Microbiology Department, Complexo Hospitalario Universitario de Vigo                                                                                                                                                           | Alfaya N; Alonso I; Alvarez M; Cabrera JJ; Carballo R; Cores O; Cortizo S; Davina C; Martínez L; Mediero G; Perez S; Potel C; Regueiro B; Rey S; Vasallo FJ; del-Campo V                                                                                                                                                                                                                                                                                                                                                                                                                                                                          |
| EPI_ISL_2854066                                                                                                                                                                                                                                                                                                                                                                                                                                                                                                                                                | Microbiology and Virology Laboratory, "Policlinico Riuniti, Azienda Ospedaliero Universitaria, Foggia"                                                                                                         | Microbiology and Virology Laboratory, "Policlinico Riuniti, Azienda Ospedaliero Universitaria, Foggia"                                                                                                                         | Annamaria D'Aprile; Daniela Pisanelli; Donatella Cedola; Fabio Arena; Loris Micelli; Maria Pia Patrizio; Maria Rosaria Lipsi; Maurizio Margaglione and Rosella De Nitiss.; Settimia Altamura; Tiziana Rollo; Valeria Delli Carri                                                                                                                                                                                                                                                                                                                                                                                                                  |
| EPI_ISL_2362674, EPI_ISL_2362680, EPI_ISL_2362684, EPI_ISL_2362685                                                                                                                                                                                                                                                                                                                                                                                                                                                                                             | Microbiology and Virology Unit, Florence Careggi University Hospital                                                                                                                                           | Microbiology and Virology Unit, Florence Careggi University Hospital                                                                                                                                                           | Alberto Antonelli; Emanuele Gori; Fabio Morecchiato; Gian Maria Rossolini; Ilaria Baccani; Marco Coppi; Nicla Giovacchini; Noemi Aiezza; Vincenzo Di Pilato                                                                                                                                                                                                                                                                                                                                                                                                                                                                                       |
| EPI_ISL_2232671, EPI_ISL_2403370, EPI_ISL_2716318, EPI_ISL_27716319                                                                                                                                                                                                                                                                                                                                                                                                                                                                                            | Ministry of Health Turkey                                                                                                                                                                                      | Ministry of Health Turkey                                                                                                                                                                                                      | Fatma Bayrakdar; Gulay Korukluoglu; Suleyman Yalcin; Yasemin Cosgun                                                                                                                                                                                                                                                                                                                                                                                                                                                                                                                                                                               |
| EPI_ISL_2776430                                                                                                                                                                                                                                                                                                                                                                                                                                                                                                                                                | Ministry of Health, Jaber Al-Ahmad Hospital                                                                                                                                                                    | Virology Unit, Department of Microbiology, Faculty of Medicine, Kuwait University                                                                                                                                              | Antal Al-Adwani; Ebaa Al-Awadhi; Hussain Safar; Nada Madi                                                                                                                                                                                                                                                                                                                                                                                                                                                                                                                                                                                         |
| EPI_ISL_2776369                                                                                                                                                                                                                                                                                                                                                                                                                                                                                                                                                | Ministry of Health, Jaber Al-Ahmad Hospital                                                                                                                                                                    | Virology Unit, Department of Microbiology, Faulty of Medicine, Kuwait University                                                                                                                                               | Antal Al-Adwani; Ebaa Al-Awadhi; Hussain Safar; Nada Madi                                                                                                                                                                                                                                                                                                                                                                                                                                                                                                                                                                                         |
| EPI_ISL_2843009, EPI_ISL_2843089, EPI_ISL_2843091, EPI_ISL_2843092, EPI_ISL_2843095, EPI_ISL_2843096, EPI_ISL_2843103, EPI_ISL_2843106, EPI_ISL_2843108, EPI_ISL_2843111, EPI_ISL_2843112, EPI_ISL_2843114, EPI_ISL_2843119, EPI_ISL_2843122, EPI_ISL_2843125, EPI_ISL_2843128, EPI_ISL_2843129, EPI_ISL_2843141, EPI_ISL_2843143, EPI_ISL_2843145, EPI_ISL_2843148, EPI_ISL_2843150, EPI_ISL_2843154, EPI_ISL_2843161, EPI_ISL_2843163, EPI_ISL_2843165, EPI_ISL_2843173, EPI_ISL_2843174, EPI_ISL_2843199, EPI_ISL_2843204, EPI_ISL_2843228, EPI_ISL_2843241 | see above                                                                                                                                                                                                      | Ministry of Public Health / Hamad Medical Corporation                                                                                                                                                                          | Biomedical Research Center (BRC), Qatar University / Qatar Genome Project (QGP)                                                                                                                                                                                                                                                                                                                                                                                                                                                                                                                                                                   |
| EPI_ISL_2693671                                                                                                                                                                                                                                                                                                                                                                                                                                                                                                                                                | Mitra Keluarga Hospital Waru                                                                                                                                                                                   | Institute of Tropical Disease, Universitas Airlangga                                                                                                                                                                           | Asmaa A. Al-Thani. MOPH and HMC: Abdulatif Al-Khal; BRC: Fatiha M. Benslimane; Chadi Saad; Dana Al-Batesh; Dina Elgakhlab OGP: Fatima H. Al-Kuwari; Einas A. E. Al-Kuwari; Hadi M. Yassine; Hamad E. Al-Romaihi; Hamda Alromaihi; Heba A. Al-Khatib; Mashael A. Al-Bader; Mohammed Al-Thani; Muna A. S. Al-Maslamani; Oal Al-Jamal; Peter V. Coyle; Reham A. El-Kahlout. QBB: Tasneem Al-Hamad; Roberto Bertollini; Salih Al-Marri                                                                                                                                                                                                                |
| EPI_ISL_2724009                                                                                                                                                                                                                                                                                                                                                                                                                                                                                                                                                | Molecular Biology Laboratory, Infectious Diseases Department, Instituto Nacional de Ciencias Medicas y Nutricion Salvador Zubiran                                                                              | Instituto Nacional de Ciencias Medicas y Nutricion Infectious Diseases                                                                                                                                                         | Aldise M Nastri; Febria Rachmanita; Gatot Soegiarto; Herlin Ferliana; Jezzy R Dewantari; Kazufumi Shimizu; Krisnoadi Rahardjo; Laksmi Wulandari; Maria I Lusida; Resti Yudhawati; Rima R Prasetya; Soetjipto; Yasuko Mori                                                                                                                                                                                                                                                                                                                                                                                                                         |
| EPI_ISL_2626269, EPI_ISL_2626341, EPI_ISL_2626393                                                                                                                                                                                                                                                                                                                                                                                                                                                                                                              | Molecular diagnostic laboratory of Federal Budget Institution of Science "Central Research Institute of Epidemiology" of The Federal Service on Customers' Rights Protection and Human Well-being Surveillance | Group of Genomics and Postgenomic Technologies of Central Research Institute of Epidemiology                                                                                                                                   | Arturo Galindo; Eric Ochoa; Fernando Ledesma Barrientos; Guillermo Ruiz-Palacios y Santos; Patricia Leal; Pilar Ramos Cervantes; Violeta Ibarra Gonzalez                                                                                                                                                                                                                                                                                                                                                                                                                                                                                          |
| EPI_ISL_2688325, EPI_ISL_2688357, EPI_ISL_2688365, EPI_ISL_2774088                                                                                                                                                                                                                                                                                                                                                                                                                                                                                             | Multiplex DX                                                                                                                                                                                                   | Multiplex DX                                                                                                                                                                                                                   | Akimkin V.G.; Kaptelova V.V.; Kondrasheva L.Y.; Korneenko E.V.; Nadtoka M.I.; Saenko S.S.; Samoilov A.E.; Sinitsyn S.O.; Smirnova Y.S.; Speranskaya A.S.; Tivanova E.V.                                                                                                                                                                                                                                                                                                                                                                                                                                                                           |
| EPI_ISL_2816255, EPI_ISL_2816263, EPI_ISL_2816264, EPI_ISL_2816266, EPI_ISL_2816290, EPI_ISL_2816306, EPI_ISL_2816309, EPI_ISL_2816326, EPI_ISL_2816406                                                                                                                                                                                                                                                                                                                                                                                                        | see above                                                                                                                                                                                                      | N.F. Gamaleya Research Center for Epidemiology and Microbiology                                                                                                                                                                | Diana Drobna; Jakub Kovac; Pavol Cekan; Silvia Rybecka; Veronika Mancikova                                                                                                                                                                                                                                                                                                                                                                                                                                                                                                                                                                        |
| EPI_ISL_2405118                                                                                                                                                                                                                                                                                                                                                                                                                                                                                                                                                | N.H.L Municipal Medical College, Ahmedabad                                                                                                                                                                     | Gujarat Biotechnology Research Centre                                                                                                                                                                                          | Alexander Gintsburg; Alexey Shchetinin; Alina Odintsova; Andrei Botikov; Andrei Pochtovyi; Andrei Siniavin; Andrey Komissarov; Anna Kovyrshina; Artem Tkachuk; Daria Danilenko; Denis Kleymenov; Denis Logunov; Dmitry Lioznov; Dmitry Shcheblyakov; Elena Mazunina; Elena Nadeeva; Elena Shidlovskaya; Elizaveta Divisenko; Evgenia Bykonja; Georgii Bazykin; Inna Dolzhikova; Kirill Varchenko; Ksenia Safina; Kseniya Komissarova; Liubov Popova; Ludmila Vasilchenko; Maria Nikiforova; Maria Pisareva; Mikhail Bakaev; Nadezhda Kuznetsova; Nikita Yolshin; Oula Mansour; Tamila Musaeva; Veronika Eder; Vladimir Gushchin                   |
| EPI_ISL_2550605                                                                                                                                                                                                                                                                                                                                                                                                                                                                                                                                                | NB-Hôpital Georges L. Dumont                                                                                                                                                                                   | National Microbiology Laboratory (NML)                                                                                                                                                                                         | Chaitanya Joshi; Dinesh Kumar; Janvi Raval; Jaysrhi Pethani; Madhvi Joshi; Nitesh Shah; Nitin Savaliya; Ramesh Pandit; Sonal Sharma; Twinkle Soni; Umang Mishra; Zarna Patel; Zuber Saiyed                                                                                                                                                                                                                                                                                                                                                                                                                                                        |
| EPI_ISL_1663376                                                                                                                                                                                                                                                                                                                                                                                                                                                                                                                                                | NCCS, Pune                                                                                                                                                                                                     | Institute of Life Sciences - INSACOG                                                                                                                                                                                           | Anna Majer; Anneliese Landgraff; CanCOGeN's metadata curation team; Darian Hole; Elsie Grudeski; Gary Van Domselaar; Grace Seo; Guillaume Desnoyers; Jennifer Tanner; Kirsten Biggar; Madison Chapel; Morag Graham; Natalie Knox; Nathalie Bastien; Philip Mabon; Public Health Agency of Canada CanCOGeN team; Rhiannon Huzarewicz; Richard Garceau; Russell Mandes; Shari Tyson; Timothy Booth; Yan Li                                                                                                                                                                                                                                          |
| EPI_ISL_2161784, EPI_ISL_2484633, EPI_ISL_2484635, EPI_ISL_2484638, EPI_ISL_2484639, EPI_ISL_2484641, EPI_ISL_2484643, EPI_ISL_2484644                                                                                                                                                                                                                                                                                                                                                                                                                         | see above                                                                                                                                                                                                      | NL-Dr. Leonard A. Miller Centre for Health Services                                                                                                                                                                            | Adel Malek; Anna Majer; Anneliese Landgraff; CanCOGeN's metadata curation team; Darian Hole; Elsie Grudeski; Gary Van Domselaar; George Zahariadis; Grace Seo; Jennifer Tanner; Kerri Smith; Kirsten Biggar; Laura Gilbert; Madison Chapel; Morag Graham; Natalie Knox; Nathalie Bastien; Philip Mabon; Public Health Agency of Canada CanCOGeN team; Rhiannon Huzarewicz; Robert Needle; Russell Mandes; Shari Tyson; Timothy Booth; Yan Li; Yang Yu                                                                                                                                                                                             |
| EPI_ISL_1482556                                                                                                                                                                                                                                                                                                                                                                                                                                                                                                                                                | NORTHWELL HEALTH LABORATORIES                                                                                                                                                                                  | Wadsworth Center, New York State Department of Health                                                                                                                                                                          | Ajay Parida; Amol M. Kanampaliwar; Arup Ghosh; Adimukta Jha; INSACOG Consortium; Punit Prasad; Rajeeb Swain; Rupesh Dash; Safal Walia; Shifu Aggarwal; Sunil K. Raghav                                                                                                                                                                                                                                                                                                                                                                                                                                                                            |
| EPI_ISL_2162072                                                                                                                                                                                                                                                                                                                                                                                                                                                                                                                                                | NS-QEII Health Sciences Centre                                                                                                                                                                                 | National Microbiology Laboratory (NML)                                                                                                                                                                                         | Alexis Russell; Catharine Prussing; Daryl M. Lamson; Erasmus Schneider; Erica Lasek-Nesselquist; John Kelly; Jonathan Pitnick; Kirsten St. George; Matthew Shudt; Melissa A Leisner; Navjot Singh                                                                                                                                                                                                                                                                                                                                                                                                                                                 |
| EPI_ISL_1678079                                                                                                                                                                                                                                                                                                                                                                                                                                                                                                                                                | NYC Department of Health and Mental Hygiene                                                                                                                                                                    | Centers for Disease Control and Prevention Division of Viral Diseases, Pathogen Discovery                                                                                                                                      | Anna Majer; Anneliese Landgraff; CanCOGeN's metadata curation team; Darian Hole; Elsie Grudeski; Gary Van Domselaar; Grace Seo; Janice Pettipas; Jason LeBlanc; Jennifer Tanner; Kirsten Biggar; Madison Chapel; Morag Graham; Natalie Knox; Nathalie Bastien; Philip Mabon; Public Health Agency of Canada CanCOGeN team; Rhiannon Huzarewicz; Russell Mandes; Shari Tyson; Timothy Booth; Todd Hatchette; Yan Li                                                                                                                                                                                                                                |
| EPI_ISL_2448957                                                                                                                                                                                                                                                                                                                                                                                                                                                                                                                                                | NZOZ Medyczne Laboratorium Diagnostyczne                                                                                                                                                                       | 1. National Institute of Public Health - National Institute of Hygiene, Warsaw, Poland 2. Biobank Lab, University of Lodz 3. Laboratory of Respiratory Viruses, Teaching and Clinical Center of the Medical University of Lodz | Alison Laufer Halpin; Ben L. Rambo-Martin; Clinton R. Paden; Dakota Howard; Darlene Wagner; Dave Wentworth; Dhwani Batra; Jasmine Padilla; Justin Lee; Katie Dillon; Krista Queen; Kristen Knipe; Kristine Lacek; Mark Burroughs; Matthew Schmerer; Mili Sheth; Peter Cook; Sam Shepard; Sarah Nobles; Shoshona Le; Suxiang Tong; Vivien Dugan; Yvette Unoarumhi                                                                                                                                                                                                                                                                                  |
| EPI_ISL_2644777                                                                                                                                                                                                                                                                                                                                                                                                                                                                                                                                                | Nacionalinis maisto ir veterinarijos rizikos vertinimo institutas                                                                                                                                              | Institute of Biotechnology, Life Sciences Center, Vilnius University                                                                                                                                                           | Dominik Strapagiel; Izabela Drózd; Jakub Lach; Katarzyna Zacharczuk; Klaudyna Królikowska; Maciej Borowiec; Magdalena Nowakowska; Magdalena Traczyk-Borsztyńska; Marcin Słomka; Marta Sobalska-Kwapis; Małgorzata Sadkowska-Todys; Tomasz Płoszaj; Tomasz Wolkowicz                                                                                                                                                                                                                                                                                                                                                                               |
| EPI_ISL_2614819, EPI_ISL_2615232, EPI_ISL_2694580, EPI_ISL_2694581                                                                                                                                                                                                                                                                                                                                                                                                                                                                                             | Nacionalinis maisto ir veterinarijos rizikos vertinimo institutas                                                                                                                                              | National Public Health Surveillance Laboratory                                                                                                                                                                                 | Albertas Timinskias; Alma Gedvilaite; Danguole Ziogiene; Emilija Vasiliunaite; Milda Norkiene                                                                                                                                                                                                                                                                                                                                                                                                                                                                                                                                                     |
|                                                                                                                                                                                                                                                                                                                                                                                                                                                                                                                                                                |                                                                                                                                                                                                                |                                                                                                                                                                                                                                | Ana Steponkiene; Danas Baksa; Jelena Razmuk; Lukas Vasionis; Lukas Zemaitis; Migle Gabrielaite; Svajune Muralyte                                                                                                                                                                                                                                                                                                                                                                                                                                                                                                                                  |

|                                                                                                                                                                                                                                                                                                                                                                                                                                                                                                                                                                                                                                                                                                                                                                                                                                                                                                                                                                                                                                                                                                                                                                                                                                                                                                                                                                                                                                                                                                                                                                                                                                                                                                                                                                                                                                                                                                                                                                                                                                                                                                                                                                                                                                                                                                                                                                                                                                                                                                                                                                                                                                                                                                                                                                                                                                                                                                                                                                                                                                                                                                                                                                                                                                                                                                                                                                                                                                                                                                                                                                                                                                                                                                                                                                                                                                                                                                                                                                                                                                                                                                                                                                                                                                                                                                                                                                                                                                                                                                                                                                                                                                                                                                                                                                                                                                                                                                                                                                                                                                                                                                                                                                                                                                                                                                                                                                                                                                                                                                                                                                                                                                                                                                                                                                                                                                                                                                                                                                                                                                                                                                                                                                                                                                                                                                                                                                                                                                                                                                                                                                                                                                                                                                                                                                                                                                                                                 |                                                                                          |                                                                                                                                                                                                                                  |                                                                                                                                                                                                                                                                                                                                            |
|---------------------------------------------------------------------------------------------------------------------------------------------------------------------------------------------------------------------------------------------------------------------------------------------------------------------------------------------------------------------------------------------------------------------------------------------------------------------------------------------------------------------------------------------------------------------------------------------------------------------------------------------------------------------------------------------------------------------------------------------------------------------------------------------------------------------------------------------------------------------------------------------------------------------------------------------------------------------------------------------------------------------------------------------------------------------------------------------------------------------------------------------------------------------------------------------------------------------------------------------------------------------------------------------------------------------------------------------------------------------------------------------------------------------------------------------------------------------------------------------------------------------------------------------------------------------------------------------------------------------------------------------------------------------------------------------------------------------------------------------------------------------------------------------------------------------------------------------------------------------------------------------------------------------------------------------------------------------------------------------------------------------------------------------------------------------------------------------------------------------------------------------------------------------------------------------------------------------------------------------------------------------------------------------------------------------------------------------------------------------------------------------------------------------------------------------------------------------------------------------------------------------------------------------------------------------------------------------------------------------------------------------------------------------------------------------------------------------------------------------------------------------------------------------------------------------------------------------------------------------------------------------------------------------------------------------------------------------------------------------------------------------------------------------------------------------------------------------------------------------------------------------------------------------------------------------------------------------------------------------------------------------------------------------------------------------------------------------------------------------------------------------------------------------------------------------------------------------------------------------------------------------------------------------------------------------------------------------------------------------------------------------------------------------------------------------------------------------------------------------------------------------------------------------------------------------------------------------------------------------------------------------------------------------------------------------------------------------------------------------------------------------------------------------------------------------------------------------------------------------------------------------------------------------------------------------------------------------------------------------------------------------------------------------------------------------------------------------------------------------------------------------------------------------------------------------------------------------------------------------------------------------------------------------------------------------------------------------------------------------------------------------------------------------------------------------------------------------------------------------------------------------------------------------------------------------------------------------------------------------------------------------------------------------------------------------------------------------------------------------------------------------------------------------------------------------------------------------------------------------------------------------------------------------------------------------------------------------------------------------------------------------------------------------------------------------------------------------------------------------------------------------------------------------------------------------------------------------------------------------------------------------------------------------------------------------------------------------------------------------------------------------------------------------------------------------------------------------------------------------------------------------------------------------------------------------------------------------------------------------------------------------------------------------------------------------------------------------------------------------------------------------------------------------------------------------------------------------------------------------------------------------------------------------------------------------------------------------------------------------------------------------------------------------------------------------------------------------------------------------------------------------------------------------------------------------------------------------------------------------------------------------------------------------------------------------------------------------------------------------------------------------------------------------------------------------------------------------------------------------------------------------------------------------------------------------------------------------------------------------------------|------------------------------------------------------------------------------------------|----------------------------------------------------------------------------------------------------------------------------------------------------------------------------------------------------------------------------------|--------------------------------------------------------------------------------------------------------------------------------------------------------------------------------------------------------------------------------------------------------------------------------------------------------------------------------------------|
| EPI_ISL_2798960                                                                                                                                                                                                                                                                                                                                                                                                                                                                                                                                                                                                                                                                                                                                                                                                                                                                                                                                                                                                                                                                                                                                                                                                                                                                                                                                                                                                                                                                                                                                                                                                                                                                                                                                                                                                                                                                                                                                                                                                                                                                                                                                                                                                                                                                                                                                                                                                                                                                                                                                                                                                                                                                                                                                                                                                                                                                                                                                                                                                                                                                                                                                                                                                                                                                                                                                                                                                                                                                                                                                                                                                                                                                                                                                                                                                                                                                                                                                                                                                                                                                                                                                                                                                                                                                                                                                                                                                                                                                                                                                                                                                                                                                                                                                                                                                                                                                                                                                                                                                                                                                                                                                                                                                                                                                                                                                                                                                                                                                                                                                                                                                                                                                                                                                                                                                                                                                                                                                                                                                                                                                                                                                                                                                                                                                                                                                                                                                                                                                                                                                                                                                                                                                                                                                                                                                                                                                 | Nacionālais medicīnas serviss - laboratorija, SIA                                        | Riga East University Hospital, National Microbiology Reference Laboratory; Eurofins Genomics Europe Sequencing GmbH                                                                                                              | Arzu Aigulieva; Diāna Dušacka; Dārta Pūpola; Ilva Pole; Inīta Balta; Jevgeņijs Bodrenko; Jūlija Čevere; Nataļja Mikena; Reinis Vangravs; Reinis Zeltmatis; Sergejs Nikišins; Ģirts Šķenders                                                                                                                                                |
| EPI_ISL_2673831, EPI_ISL_2673842                                                                                                                                                                                                                                                                                                                                                                                                                                                                                                                                                                                                                                                                                                                                                                                                                                                                                                                                                                                                                                                                                                                                                                                                                                                                                                                                                                                                                                                                                                                                                                                                                                                                                                                                                                                                                                                                                                                                                                                                                                                                                                                                                                                                                                                                                                                                                                                                                                                                                                                                                                                                                                                                                                                                                                                                                                                                                                                                                                                                                                                                                                                                                                                                                                                                                                                                                                                                                                                                                                                                                                                                                                                                                                                                                                                                                                                                                                                                                                                                                                                                                                                                                                                                                                                                                                                                                                                                                                                                                                                                                                                                                                                                                                                                                                                                                                                                                                                                                                                                                                                                                                                                                                                                                                                                                                                                                                                                                                                                                                                                                                                                                                                                                                                                                                                                                                                                                                                                                                                                                                                                                                                                                                                                                                                                                                                                                                                                                                                                                                                                                                                                                                                                                                                                                                                                                                                | Nastavni zavod za javno zdravstvo Splitsko- Dalmatinske županije                         | Hrvatski zavod za javno zdravstvo                                                                                                                                                                                                | Irena Tabain; Ivana Ferenčak                                                                                                                                                                                                                                                                                                               |
| EPI_ISL_2379203, EPI_ISL_2772526, EPI_ISL_2772527, EPI_ISL_2772529, EPI_ISL_2772530, EPI_ISL_2772531                                                                                                                                                                                                                                                                                                                                                                                                                                                                                                                                                                                                                                                                                                                                                                                                                                                                                                                                                                                                                                                                                                                                                                                                                                                                                                                                                                                                                                                                                                                                                                                                                                                                                                                                                                                                                                                                                                                                                                                                                                                                                                                                                                                                                                                                                                                                                                                                                                                                                                                                                                                                                                                                                                                                                                                                                                                                                                                                                                                                                                                                                                                                                                                                                                                                                                                                                                                                                                                                                                                                                                                                                                                                                                                                                                                                                                                                                                                                                                                                                                                                                                                                                                                                                                                                                                                                                                                                                                                                                                                                                                                                                                                                                                                                                                                                                                                                                                                                                                                                                                                                                                                                                                                                                                                                                                                                                                                                                                                                                                                                                                                                                                                                                                                                                                                                                                                                                                                                                                                                                                                                                                                                                                                                                                                                                                                                                                                                                                                                                                                                                                                                                                                                                                                                                                            | National Center of Infectious and Parasitic Diseases                                     | National Center of Infectious and Parasitic Diseases                                                                                                                                                                             | Alexiev et al                                                                                                                                                                                                                                                                                                                              |
| EPI_ISL_1544014, EPI_ISL_2304085, EPI_ISL_2332708, EPI_ISL_2332739, EPI_ISL_2332740                                                                                                                                                                                                                                                                                                                                                                                                                                                                                                                                                                                                                                                                                                                                                                                                                                                                                                                                                                                                                                                                                                                                                                                                                                                                                                                                                                                                                                                                                                                                                                                                                                                                                                                                                                                                                                                                                                                                                                                                                                                                                                                                                                                                                                                                                                                                                                                                                                                                                                                                                                                                                                                                                                                                                                                                                                                                                                                                                                                                                                                                                                                                                                                                                                                                                                                                                                                                                                                                                                                                                                                                                                                                                                                                                                                                                                                                                                                                                                                                                                                                                                                                                                                                                                                                                                                                                                                                                                                                                                                                                                                                                                                                                                                                                                                                                                                                                                                                                                                                                                                                                                                                                                                                                                                                                                                                                                                                                                                                                                                                                                                                                                                                                                                                                                                                                                                                                                                                                                                                                                                                                                                                                                                                                                                                                                                                                                                                                                                                                                                                                                                                                                                                                                                                                                                             | National Centre For Cell Science                                                         | National Centre For Cell Science – INSACOG                                                                                                                                                                                       | Ajay Pillai; Dhiraj Paul; INSACOG Consortium team; Manoj Kumar Bhat; Mitali Inamdar; Mohak P Gujare; Shivang P. Bhanushali; Sonal Manik Chavan; Yogesh Shouche                                                                                                                                                                             |
| EPI_ISL_2460868, EPI_ISL_2461385, EPI_ISL_2461393, EPI_ISL_2461408, EPI_ISL_2461448, EPI_ISL_2461623, EPI_ISL_2461995                                                                                                                                                                                                                                                                                                                                                                                                                                                                                                                                                                                                                                                                                                                                                                                                                                                                                                                                                                                                                                                                                                                                                                                                                                                                                                                                                                                                                                                                                                                                                                                                                                                                                                                                                                                                                                                                                                                                                                                                                                                                                                                                                                                                                                                                                                                                                                                                                                                                                                                                                                                                                                                                                                                                                                                                                                                                                                                                                                                                                                                                                                                                                                                                                                                                                                                                                                                                                                                                                                                                                                                                                                                                                                                                                                                                                                                                                                                                                                                                                                                                                                                                                                                                                                                                                                                                                                                                                                                                                                                                                                                                                                                                                                                                                                                                                                                                                                                                                                                                                                                                                                                                                                                                                                                                                                                                                                                                                                                                                                                                                                                                                                                                                                                                                                                                                                                                                                                                                                                                                                                                                                                                                                                                                                                                                                                                                                                                                                                                                                                                                                                                                                                                                                                                                           | National Centre for Disease Control                                                      | CDFD -INSACOG                                                                                                                                                                                                                    | Ashwin Dalal; Asmita Gupta; Divya Vashisht; Murali Bashyam; Pratyusha Bala; Vinay Donipadi                                                                                                                                                                                                                                                 |
| see above                                                                                                                                                                                                                                                                                                                                                                                                                                                                                                                                                                                                                                                                                                                                                                                                                                                                                                                                                                                                                                                                                                                                                                                                                                                                                                                                                                                                                                                                                                                                                                                                                                                                                                                                                                                                                                                                                                                                                                                                                                                                                                                                                                                                                                                                                                                                                                                                                                                                                                                                                                                                                                                                                                                                                                                                                                                                                                                                                                                                                                                                                                                                                                                                                                                                                                                                                                                                                                                                                                                                                                                                                                                                                                                                                                                                                                                                                                                                                                                                                                                                                                                                                                                                                                                                                                                                                                                                                                                                                                                                                                                                                                                                                                                                                                                                                                                                                                                                                                                                                                                                                                                                                                                                                                                                                                                                                                                                                                                                                                                                                                                                                                                                                                                                                                                                                                                                                                                                                                                                                                                                                                                                                                                                                                                                                                                                                                                                                                                                                                                                                                                                                                                                                                                                                                                                                                                                       | National Centre for Disease Control (NCDC) Biotechnology Division, Delhi                 | NCDC Delhi, Biotechnology Division INSACOG                                                                                                                                                                                       | Hema Gogia; Hemlata Lala; Kalaarasan Ponnusamy; Mahesh S Dhar; Manoj K Singh; Meena Datta; Partha Rakshit; Preeti Madan; Priyanka Singh; Radhakrishnan V. S; Robin Marwal; Sandhya Kabra; Sujeet K Singh; Uma Sharma                                                                                                                       |
| EPI_ISL_2493032, EPI_ISL_2493068, EPI_ISL_2493069                                                                                                                                                                                                                                                                                                                                                                                                                                                                                                                                                                                                                                                                                                                                                                                                                                                                                                                                                                                                                                                                                                                                                                                                                                                                                                                                                                                                                                                                                                                                                                                                                                                                                                                                                                                                                                                                                                                                                                                                                                                                                                                                                                                                                                                                                                                                                                                                                                                                                                                                                                                                                                                                                                                                                                                                                                                                                                                                                                                                                                                                                                                                                                                                                                                                                                                                                                                                                                                                                                                                                                                                                                                                                                                                                                                                                                                                                                                                                                                                                                                                                                                                                                                                                                                                                                                                                                                                                                                                                                                                                                                                                                                                                                                                                                                                                                                                                                                                                                                                                                                                                                                                                                                                                                                                                                                                                                                                                                                                                                                                                                                                                                                                                                                                                                                                                                                                                                                                                                                                                                                                                                                                                                                                                                                                                                                                                                                                                                                                                                                                                                                                                                                                                                                                                                                                                               | National HIV Reference Laboratory, Ministry of Health, Public Health Institute of Malawi | CERI, Centre for Epidemic Response and Innovation, Stellenbosch University and KRISP, KZN Research Innovation and Sequencing Platform, UKZN.                                                                                     | Auld A; Chilima B; Chiwaula M; Emmanuel SJ; Giandhari J; Kaba M; Kampira E; Kasambara W; Kim L; Lessells R; Maida A; Mvula B; Mwangomba W; Naidoo Y; Panja L; Pillay S; Tegally H; Wadonda N; Wilkinson E; de Oliveira T                                                                                                                   |
| EPI_ISL_2379748                                                                                                                                                                                                                                                                                                                                                                                                                                                                                                                                                                                                                                                                                                                                                                                                                                                                                                                                                                                                                                                                                                                                                                                                                                                                                                                                                                                                                                                                                                                                                                                                                                                                                                                                                                                                                                                                                                                                                                                                                                                                                                                                                                                                                                                                                                                                                                                                                                                                                                                                                                                                                                                                                                                                                                                                                                                                                                                                                                                                                                                                                                                                                                                                                                                                                                                                                                                                                                                                                                                                                                                                                                                                                                                                                                                                                                                                                                                                                                                                                                                                                                                                                                                                                                                                                                                                                                                                                                                                                                                                                                                                                                                                                                                                                                                                                                                                                                                                                                                                                                                                                                                                                                                                                                                                                                                                                                                                                                                                                                                                                                                                                                                                                                                                                                                                                                                                                                                                                                                                                                                                                                                                                                                                                                                                                                                                                                                                                                                                                                                                                                                                                                                                                                                                                                                                                                                                 | National Heart Institute                                                                 | Institute for Medical Research, Infectious Disease Research Centre, National Institutes of Health, Ministry of Health Malaysia                                                                                                   | Azizan MA; Kamel K; Mohd Zawawi Z; Ramly N; Robert F; Suppiah J; Thayan R                                                                                                                                                                                                                                                                  |
| EPI_ISL_2434158                                                                                                                                                                                                                                                                                                                                                                                                                                                                                                                                                                                                                                                                                                                                                                                                                                                                                                                                                                                                                                                                                                                                                                                                                                                                                                                                                                                                                                                                                                                                                                                                                                                                                                                                                                                                                                                                                                                                                                                                                                                                                                                                                                                                                                                                                                                                                                                                                                                                                                                                                                                                                                                                                                                                                                                                                                                                                                                                                                                                                                                                                                                                                                                                                                                                                                                                                                                                                                                                                                                                                                                                                                                                                                                                                                                                                                                                                                                                                                                                                                                                                                                                                                                                                                                                                                                                                                                                                                                                                                                                                                                                                                                                                                                                                                                                                                                                                                                                                                                                                                                                                                                                                                                                                                                                                                                                                                                                                                                                                                                                                                                                                                                                                                                                                                                                                                                                                                                                                                                                                                                                                                                                                                                                                                                                                                                                                                                                                                                                                                                                                                                                                                                                                                                                                                                                                                                                 | National Hospital for Tropical Diseases                                                  | Oxford University Clinical Research Unit, Hanoi                                                                                                                                                                                  | H.Rogier van Doorn on behalf of the OUCRU COVID-19 research group; Le Van Duyet; Nguyen Thi Hong Thuong; Nguyen Thi Kim Chi; Nguyen Thi Tam; Nguyen Thu Trang; Pham Ngoc Thach; Phan Manh Cuong; Thomas Kesteman; Van Dinh Trang                                                                                                           |
| EPI_ISL_2455221, EPI_ISL_2455222, EPI_ISL_2455223, EPI_ISL_2455224, EPI_ISL_2455233, EPI_ISL_2455234, EPI_ISL_2455235, EPI_ISL_2455238, EPI_ISL_2455239, EPI_ISL_2455240, EPI_ISL_2455398, EPI_ISL_2455399, EPI_ISL_2455411, EPI_ISL_2455416, EPI_ISL_2455417, EPI_ISL_2455480, EPI_ISL_2455481, EPI_ISL_2455482, EPI_ISL_2455483, EPI_ISL_2455484, EPI_ISL_2455485, EPI_ISL_2455486, EPI_ISL_2455487, EPI_ISL_2455488, EPI_ISL_2455489, EPI_ISL_2455490, EPI_ISL_2455491, EPI_ISL_2455492, EPI_ISL_2455494, EPI_ISL_2455495, EPI_ISL_2455496, EPI_ISL_2455497, EPI_ISL_2455554, EPI_ISL_2455559, EPI_ISL_2455560, EPI_ISL_2455561, EPI_ISL_2455583, EPI_ISL_2455585, EPI_ISL_2455587, EPI_ISL_2455677, EPI_ISL_2455895, EPI_ISL_2456004, EPI_ISL_2456330, EPI_ISL_2457173, EPI_ISL_2458057, EPI_ISL_2458058, EPI_ISL_2458059, EPI_ISL_2458060, EPI_ISL_2458061, EPI_ISL_2458062                                                                                                                                                                                                                                                                                                                                                                                                                                                                                                                                                                                                                                                                                                                                                                                                                                                                                                                                                                                                                                                                                                                                                                                                                                                                                                                                                                                                                                                                                                                                                                                                                                                                                                                                                                                                                                                                                                                                                                                                                                                                                                                                                                                                                                                                                                                                                                                                                                                                                                                                                                                                                                                                                                                                                                                                                                                                                                                                                                                                                                                                                                                                                                                                                                                                                                                                                                                                                                                                                                                                                                                                                                                                                                                                                                                                                                                                                                                                                                                                                                                                                                                                                                                                                                                                                                                                                                                                                                                                                                                                                                                                                                                                                                                                                                                                                                                                                                                                                                                                                                                                                                                                                                                                                                                                                                                                                                                                                                                                                                                                                                                                                                                                                                                                                                                                                                                                                                                                                                                                | Oxford University Clinical Research Unit, Hanoi, Vietnam                                 | H.Rogier van Doorn on behalf of the OUCRU COVID-19 research group; Le Van Duyet; Nguyen Thi Hong Thuong; Nguyen Thi Kim Chi; Nguyen Thi Tam; Nguyen Thu Trang; Pham Ngoc Thach; Phan Manh Cuong; Thomas Kesteman; Van Dinh Trang |                                                                                                                                                                                                                                                                                                                                            |
| see above                                                                                                                                                                                                                                                                                                                                                                                                                                                                                                                                                                                                                                                                                                                                                                                                                                                                                                                                                                                                                                                                                                                                                                                                                                                                                                                                                                                                                                                                                                                                                                                                                                                                                                                                                                                                                                                                                                                                                                                                                                                                                                                                                                                                                                                                                                                                                                                                                                                                                                                                                                                                                                                                                                                                                                                                                                                                                                                                                                                                                                                                                                                                                                                                                                                                                                                                                                                                                                                                                                                                                                                                                                                                                                                                                                                                                                                                                                                                                                                                                                                                                                                                                                                                                                                                                                                                                                                                                                                                                                                                                                                                                                                                                                                                                                                                                                                                                                                                                                                                                                                                                                                                                                                                                                                                                                                                                                                                                                                                                                                                                                                                                                                                                                                                                                                                                                                                                                                                                                                                                                                                                                                                                                                                                                                                                                                                                                                                                                                                                                                                                                                                                                                                                                                                                                                                                                                                       | National Hospital for Tropical Diseases                                                  | Oxford University Clinical Research Unit, Hanoi, Vietnam                                                                                                                                                                         | H.Rogier van Doorn on behalf of the OUCRU COVID-19 research group; Le Van Duyet; Nguyen Thi Hong Thuong; Nguyen Thi Kim Chi; Nguyen Thi Tam; Nguyen Thu Trang; Pham Ngoc Thach; Phan Manh Cuong; Thomas Kesteman; Van Dinh Trang                                                                                                           |
| EPI_ISL_2373108, EPI_ISL_2373109, EPI_ISL_2373110, EPI_ISL_2373111, EPI_ISL_2479934, EPI_ISL_2479935, EPI_ISL_2479936, EPI_ISL_2479937, EPI_ISL_2479938, EPI_ISL_2479939, EPI_ISL_2479940, EPI_ISL_2479941, EPI_ISL_2479942, EPI_ISL_2479943, EPI_ISL_2479944, EPI_ISL_2479945, EPI_ISL_2479946, EPI_ISL_2479947                                                                                                                                                                                                                                                                                                                                                                                                                                                                                                                                                                                                                                                                                                                                                                                                                                                                                                                                                                                                                                                                                                                                                                                                                                                                                                                                                                                                                                                                                                                                                                                                                                                                                                                                                                                                                                                                                                                                                                                                                                                                                                                                                                                                                                                                                                                                                                                                                                                                                                                                                                                                                                                                                                                                                                                                                                                                                                                                                                                                                                                                                                                                                                                                                                                                                                                                                                                                                                                                                                                                                                                                                                                                                                                                                                                                                                                                                                                                                                                                                                                                                                                                                                                                                                                                                                                                                                                                                                                                                                                                                                                                                                                                                                                                                                                                                                                                                                                                                                                                                                                                                                                                                                                                                                                                                                                                                                                                                                                                                                                                                                                                                                                                                                                                                                                                                                                                                                                                                                                                                                                                                                                                                                                                                                                                                                                                                                                                                                                                                                                                                                | National Influenza Center, National Institute of Hygiene and Epidemiology (NIHE)         | National Influenza Center, National Institute of Hygiene and Epidemiology (NIHE)                                                                                                                                                 | Dang Duc Anh; Hoang Vu Mai Phuong; Le Quynh Mai; Le Thi Thanh; Nguyen Co Thach; Nguyen Le Khanh Hang; Nguyen Phuong Anh; Nguyen Thi Kieu Anh; Nguyen Thi Quyen; Nguyen Vu Son; Phan Thi Hien; Taichiro Takemura; Tran Thi Hien; Tran Thu Huong; Ung Thi Hong Trang; Vuong Duc Cuong; Vù Hiếu                                               |
| EPI_ISL_2285862                                                                                                                                                                                                                                                                                                                                                                                                                                                                                                                                                                                                                                                                                                                                                                                                                                                                                                                                                                                                                                                                                                                                                                                                                                                                                                                                                                                                                                                                                                                                                                                                                                                                                                                                                                                                                                                                                                                                                                                                                                                                                                                                                                                                                                                                                                                                                                                                                                                                                                                                                                                                                                                                                                                                                                                                                                                                                                                                                                                                                                                                                                                                                                                                                                                                                                                                                                                                                                                                                                                                                                                                                                                                                                                                                                                                                                                                                                                                                                                                                                                                                                                                                                                                                                                                                                                                                                                                                                                                                                                                                                                                                                                                                                                                                                                                                                                                                                                                                                                                                                                                                                                                                                                                                                                                                                                                                                                                                                                                                                                                                                                                                                                                                                                                                                                                                                                                                                                                                                                                                                                                                                                                                                                                                                                                                                                                                                                                                                                                                                                                                                                                                                                                                                                                                                                                                                                                 | National Influenza Centre                                                                | National Influenza Centre                                                                                                                                                                                                        | ; Benjamin B. Lindsey; Benjamin H. Foulkes; Dennis Laryea; Ernest Asiedu; Franklin Asiedu-Bekoe; Gordon Awandare; Ivy A. Asante; Joseph Oliver-Commyey; Joyce Ngoi; Linda Boatema; Lorreta Kwasa; Mathew D. Parker; Michael Marks; Mildred Adusei-Poku; Sharon Hsu; Thushan I de Silva; William K. Ampofo                                  |
| EPI_ISL_2099853, EPI_ISL_2308249, EPI_ISL_2566447, EPI_ISL_2566459, EPI_ISL_2566460, EPI_ISL_2687995, EPI_ISL_2687996                                                                                                                                                                                                                                                                                                                                                                                                                                                                                                                                                                                                                                                                                                                                                                                                                                                                                                                                                                                                                                                                                                                                                                                                                                                                                                                                                                                                                                                                                                                                                                                                                                                                                                                                                                                                                                                                                                                                                                                                                                                                                                                                                                                                                                                                                                                                                                                                                                                                                                                                                                                                                                                                                                                                                                                                                                                                                                                                                                                                                                                                                                                                                                                                                                                                                                                                                                                                                                                                                                                                                                                                                                                                                                                                                                                                                                                                                                                                                                                                                                                                                                                                                                                                                                                                                                                                                                                                                                                                                                                                                                                                                                                                                                                                                                                                                                                                                                                                                                                                                                                                                                                                                                                                                                                                                                                                                                                                                                                                                                                                                                                                                                                                                                                                                                                                                                                                                                                                                                                                                                                                                                                                                                                                                                                                                                                                                                                                                                                                                                                                                                                                                                                                                                                                                           | see above                                                                                | National Institute of Infectious Diseases-Prof. Dr. Matei Bals Molecular Diagnostics Laboratory                                                                                                                                  | Andreea Tudor; Corina Casangiu; Dan Otelea; Leontina Banica; Marius Surleac; Ovidiu Vlaicu; Petre Milu; Robert Hohan; Simona Paraschiv                                                                                                                                                                                                     |
| EPI_ISL_2433938, EPI_ISL_2796525, EPI_ISL_2796528                                                                                                                                                                                                                                                                                                                                                                                                                                                                                                                                                                                                                                                                                                                                                                                                                                                                                                                                                                                                                                                                                                                                                                                                                                                                                                                                                                                                                                                                                                                                                                                                                                                                                                                                                                                                                                                                                                                                                                                                                                                                                                                                                                                                                                                                                                                                                                                                                                                                                                                                                                                                                                                                                                                                                                                                                                                                                                                                                                                                                                                                                                                                                                                                                                                                                                                                                                                                                                                                                                                                                                                                                                                                                                                                                                                                                                                                                                                                                                                                                                                                                                                                                                                                                                                                                                                                                                                                                                                                                                                                                                                                                                                                                                                                                                                                                                                                                                                                                                                                                                                                                                                                                                                                                                                                                                                                                                                                                                                                                                                                                                                                                                                                                                                                                                                                                                                                                                                                                                                                                                                                                                                                                                                                                                                                                                                                                                                                                                                                                                                                                                                                                                                                                                                                                                                                                               | National Institute of Laboratory Medicine and Referral Center                            | Genomic Research Lab, BCSIR                                                                                                                                                                                                      | Abu Sayeed Mohammad Mahmud; Arifa Akram; Ashish Kumar Ghosh; Barna Goswami; Eshrar Osman; Iffat Jahan; Mahmuda Yasmin; Md. Ahasan Habib; Md. Kamrul Islam; Md. Maruf Ahmed Molla; Md. Murshed Hasan Sarkar; Md. Salim Khan; Mohammad Mohi Uddin; Mohammad Samir Uzzaman; Shahina Akter; Tanjina Akhter Banu; Tasnim Nafisa                 |
| EPI_ISL_2015692                                                                                                                                                                                                                                                                                                                                                                                                                                                                                                                                                                                                                                                                                                                                                                                                                                                                                                                                                                                                                                                                                                                                                                                                                                                                                                                                                                                                                                                                                                                                                                                                                                                                                                                                                                                                                                                                                                                                                                                                                                                                                                                                                                                                                                                                                                                                                                                                                                                                                                                                                                                                                                                                                                                                                                                                                                                                                                                                                                                                                                                                                                                                                                                                                                                                                                                                                                                                                                                                                                                                                                                                                                                                                                                                                                                                                                                                                                                                                                                                                                                                                                                                                                                                                                                                                                                                                                                                                                                                                                                                                                                                                                                                                                                                                                                                                                                                                                                                                                                                                                                                                                                                                                                                                                                                                                                                                                                                                                                                                                                                                                                                                                                                                                                                                                                                                                                                                                                                                                                                                                                                                                                                                                                                                                                                                                                                                                                                                                                                                                                                                                                                                                                                                                                                                                                                                                                                 | National Institute of Public Health - National Institute of Hygiene                      | 1. National Institute of Public Health - National Institute of Hygiene, Warsaw, Poland 2. Biobank Lab, University of Lodz 3. Laboratory of Respiratory Viruses, Teaching and Clinical Center of the Medical University of Lodz   | Dominik Strapagiel; Izabela Dróżdż; Jakub Lach; Katarzyna Zacharczuk; Klaudyna Królikowska; Maciej Borowiec; Magdalena Nowakowska; Magdalena Traczyk-Borszyńska; Marcin Słomka; Marta Sobalska-Kwapis; Małgorzata Sadkowska-Todys; Tomasz Płoszaj; Tomasz Wolkowicz                                                                        |
| EPI_ISL_2789321                                                                                                                                                                                                                                                                                                                                                                                                                                                                                                                                                                                                                                                                                                                                                                                                                                                                                                                                                                                                                                                                                                                                                                                                                                                                                                                                                                                                                                                                                                                                                                                                                                                                                                                                                                                                                                                                                                                                                                                                                                                                                                                                                                                                                                                                                                                                                                                                                                                                                                                                                                                                                                                                                                                                                                                                                                                                                                                                                                                                                                                                                                                                                                                                                                                                                                                                                                                                                                                                                                                                                                                                                                                                                                                                                                                                                                                                                                                                                                                                                                                                                                                                                                                                                                                                                                                                                                                                                                                                                                                                                                                                                                                                                                                                                                                                                                                                                                                                                                                                                                                                                                                                                                                                                                                                                                                                                                                                                                                                                                                                                                                                                                                                                                                                                                                                                                                                                                                                                                                                                                                                                                                                                                                                                                                                                                                                                                                                                                                                                                                                                                                                                                                                                                                                                                                                                                                                 | National Laboratory for Health, Environment and Food, OMM, Koper                         | NLZOH (National Laboratory for Health, Environment and Food) / CISLD (Clinical Institute of Special Laboratory Diagnostics), University Children's Hospital, University Medical Center Ljubljana                                 | Aleksander Kocuvan; Aleksander Mahnic; Alenka Štorman; Ana Grom; Barbara Jenko Bizjan; Gašper Strugar; Kaja Tominc; Katarina Kozmos; Maja Rupnik; Marko Pokorn; Maruša Debeljak; Maša Jarčič; Mitja Rak / Jernej Kovač; Nika Gobec; Robert Šket; Sandra Janežic; Tadej Battelino; Tina Cvetković; Tine Tesovnik; Tjaša Žohar Čretnik       |
| EPI_ISL_2789325, EPI_ISL_2789326                                                                                                                                                                                                                                                                                                                                                                                                                                                                                                                                                                                                                                                                                                                                                                                                                                                                                                                                                                                                                                                                                                                                                                                                                                                                                                                                                                                                                                                                                                                                                                                                                                                                                                                                                                                                                                                                                                                                                                                                                                                                                                                                                                                                                                                                                                                                                                                                                                                                                                                                                                                                                                                                                                                                                                                                                                                                                                                                                                                                                                                                                                                                                                                                                                                                                                                                                                                                                                                                                                                                                                                                                                                                                                                                                                                                                                                                                                                                                                                                                                                                                                                                                                                                                                                                                                                                                                                                                                                                                                                                                                                                                                                                                                                                                                                                                                                                                                                                                                                                                                                                                                                                                                                                                                                                                                                                                                                                                                                                                                                                                                                                                                                                                                                                                                                                                                                                                                                                                                                                                                                                                                                                                                                                                                                                                                                                                                                                                                                                                                                                                                                                                                                                                                                                                                                                                                                | National Laboratory for Health, Environment and Food, OMM, Kranj                         | NLZOH (National Laboratory for Health, Environment and Food) / CISLD (Clinical Institute of Special Laboratory Diagnostics), University Children's Hospital, University Medical Center Ljubljana                                 | Aleksander Kocuvan; Aleksander Mahnic; Alenka Štorman; Ana Grom; Barbara Jenko Bizjan; Kaja Tominc; Katarina Kozmos; Maja Rupnik; Marjana Petrevič / Jernej Kovač; Marko Pokorn; Maruša Debeljak; Mateja Ravnik; Maša Jarčič; Monika Korošec; Nika Gobec; Robert Šket; Sandra Janežic; Tadej Battelino; Tine Tesovnik; Tjaša Žohar Čretnik |
| EPI_ISL_2789324                                                                                                                                                                                                                                                                                                                                                                                                                                                                                                                                                                                                                                                                                                                                                                                                                                                                                                                                                                                                                                                                                                                                                                                                                                                                                                                                                                                                                                                                                                                                                                                                                                                                                                                                                                                                                                                                                                                                                                                                                                                                                                                                                                                                                                                                                                                                                                                                                                                                                                                                                                                                                                                                                                                                                                                                                                                                                                                                                                                                                                                                                                                                                                                                                                                                                                                                                                                                                                                                                                                                                                                                                                                                                                                                                                                                                                                                                                                                                                                                                                                                                                                                                                                                                                                                                                                                                                                                                                                                                                                                                                                                                                                                                                                                                                                                                                                                                                                                                                                                                                                                                                                                                                                                                                                                                                                                                                                                                                                                                                                                                                                                                                                                                                                                                                                                                                                                                                                                                                                                                                                                                                                                                                                                                                                                                                                                                                                                                                                                                                                                                                                                                                                                                                                                                                                                                                                                 | National Laboratory for Health, Environment and Food, OMM, Maribor                       | NLZOH (National Laboratory for Health, Environment and Food) / CISLD (Clinical Institute of Special Laboratory Diagnostics), University Children's Hospital, University Medical Center Ljubljana                                 | Aleksander Kocuvan; Aleksander Mahnic; Alenka Štorman; Ana Grom; Andrej Golle / Jernej Kovač; Barbara Jenko Bizjan; Kaja Tominc; Katarina Kozmos; Maja Rupnik; Marko Pokorn; Maruša Debeljak; Maša Jarčič; Mojca Cimerman; Nika Gobec; Nika Volmajer; Robert Šket; Sandra Janežic; Tadej Battelino; Tine Tesovnik; Tjaša Žohar Čretnik     |
| EPI_ISL_2756211, EPI_ISL_2895632                                                                                                                                                                                                                                                                                                                                                                                                                                                                                                                                                                                                                                                                                                                                                                                                                                                                                                                                                                                                                                                                                                                                                                                                                                                                                                                                                                                                                                                                                                                                                                                                                                                                                                                                                                                                                                                                                                                                                                                                                                                                                                                                                                                                                                                                                                                                                                                                                                                                                                                                                                                                                                                                                                                                                                                                                                                                                                                                                                                                                                                                                                                                                                                                                                                                                                                                                                                                                                                                                                                                                                                                                                                                                                                                                                                                                                                                                                                                                                                                                                                                                                                                                                                                                                                                                                                                                                                                                                                                                                                                                                                                                                                                                                                                                                                                                                                                                                                                                                                                                                                                                                                                                                                                                                                                                                                                                                                                                                                                                                                                                                                                                                                                                                                                                                                                                                                                                                                                                                                                                                                                                                                                                                                                                                                                                                                                                                                                                                                                                                                                                                                                                                                                                                                                                                                                                                                | National Platform bis UMONS/Jolimont                                                     | National Platform bis UMONS/Jolimont                                                                                                                                                                                             | Eric Tarantino; Florian Juszcak; François Dufraisse; Gautier Detry; Guillaume Bayon-Vicente; Ruddy Wattiez                                                                                                                                                                                                                                 |
| EPI_ISL_1543981, EPI_ISL_1620158, EPI_ISL_1620159, EPI_ISL_1634428, EPI_ISL_1652117, EPI_ISL_1652118, EPI_ISL_1652119, EPI_ISL_1652120, EPI_ISL_1652122, EPI_ISL_1652532, EPI_ISL_1704830, EPI_ISL_1704831, EPI_ISL_1704832, EPI_ISL_1704833, EPI_ISL_1704836, EPI_ISL_1704839, EPI_ISL_1704840, EPI_ISL_1704841, EPI_ISL_1704842, EPI_ISL_1719885, EPI_ISL_1719886, EPI_ISL_1719887, EPI_ISL_1719888, EPI_ISL_1719889, EPI_ISL_1719890, EPI_ISL_1719891, EPI_ISL_1719892, EPI_ISL_1719893, EPI_ISL_1719894, EPI_ISL_1719895, EPI_ISL_1719896, EPI_ISL_1719897, EPI_ISL_1719898, EPI_ISL_1719899, EPI_ISL_1719900, EPI_ISL_1752677, EPI_ISL_1816944, EPI_ISL_1816945, EPI_ISL_1816947, EPI_ISL_1816948, EPI_ISL_1816950, EPI_ISL_1816951, EPI_ISL_1816952, EPI_ISL_1816953, EPI_ISL_1816957, EPI_ISL_1816960, EPI_ISL_1816961, EPI_ISL_1816966, EPI_ISL_1816970, EPI_ISL_1816971, EPI_ISL_1816972, EPI_ISL_1816973, EPI_ISL_1816974, EPI_ISL_1816975, EPI_ISL_1816976, EPI_ISL_1816977, EPI_ISL_1816978, EPI_ISL_1816979, EPI_ISL_1816980, EPI_ISL_1816981, EPI_ISL_1816982, EPI_ISL_1816983, EPI_ISL_1816984, EPI_ISL_1816985, EPI_ISL_1816986, EPI_ISL_1816987, EPI_ISL_1816988, EPI_ISL_1816989, EPI_ISL_1816990, EPI_ISL_1816991, EPI_ISL_1816992, EPI_ISL_1816993, EPI_ISL_1816994, EPI_ISL_1816995, EPI_ISL_1816996, EPI_ISL_1816997, EPI_ISL_1816998, EPI_ISL_1816999, EPI_ISL_1817000, EPI_ISL_1817001, EPI_ISL_1817002, EPI_ISL_1817003, EPI_ISL_1817004, EPI_ISL_1817005, EPI_ISL_1817006, EPI_ISL_1817007, EPI_ISL_1817008, EPI_ISL_1817009, EPI_ISL_1817010, EPI_ISL_1817011, EPI_ISL_1817012, EPI_ISL_1817013, EPI_ISL_1817014, EPI_ISL_1817015, EPI_ISL_1817016, EPI_ISL_1817017, EPI_ISL_1817018, EPI_ISL_1817019, EPI_ISL_1817020, EPI_ISL_1817021, EPI_ISL_1817022, EPI_ISL_1817023, EPI_ISL_1817024, EPI_ISL_1817025, EPI_ISL_1817026, EPI_ISL_1817027, EPI_ISL_1817028, EPI_ISL_1817029, EPI_ISL_1817030, EPI_ISL_1817031, EPI_ISL_1817032, EPI_ISL_1817033, EPI_ISL_1817034, EPI_ISL_1817035, EPI_ISL_1817036, EPI_ISL_1817037, EPI_ISL_1817038, EPI_ISL_1817039, EPI_ISL_1817040, EPI_ISL_1817041, EPI_ISL_1817042, EPI_ISL_1817043, EPI_ISL_1817044, EPI_ISL_1817045, EPI_ISL_1817046, EPI_ISL_1817047, EPI_ISL_1817048, EPI_ISL_1817049, EPI_ISL_1817050, EPI_ISL_1817051, EPI_ISL_1817052, EPI_ISL_1817053, EPI_ISL_1817054, EPI_ISL_1817055, EPI_ISL_1817056, EPI_ISL_1817057, EPI_ISL_1817058, EPI_ISL_1817059, EPI_ISL_1817060, EPI_ISL_1817061, EPI_ISL_1817062, EPI_ISL_1817063, EPI_ISL_1817064, EPI_ISL_1817065, EPI_ISL_1817066, EPI_ISL_1817067, EPI_ISL_1817068, EPI_ISL_1817069, EPI_ISL_1817070, EPI_ISL_1817071, EPI_ISL_1817072, EPI_ISL_1817073, EPI_ISL_1817074, EPI_ISL_1817075, EPI_ISL_1817076, EPI_ISL_1817077, EPI_ISL_1817078, EPI_ISL_1817079, EPI_ISL_1817080, EPI_ISL_1817081, EPI_ISL_1817082, EPI_ISL_1817083, EPI_ISL_1817084, EPI_ISL_1817085, EPI_ISL_1817086, EPI_ISL_1817087, EPI_ISL_1817088, EPI_ISL_1817089, EPI_ISL_1817090, EPI_ISL_1817091, EPI_ISL_1817092, EPI_ISL_1817093, EPI_ISL_1817094, EPI_ISL_1817095, EPI_ISL_1817096, EPI_ISL_1817097, EPI_ISL_1817098, EPI_ISL_1817099, EPI_ISL_1817100, EPI_ISL_1817101, EPI_ISL_1817102, EPI_ISL_1817103, EPI_ISL_1817104, EPI_ISL_1817105, EPI_ISL_1817106, EPI_ISL_1817107, EPI_ISL_1817108, EPI_ISL_1817109, EPI_ISL_1817110, EPI_ISL_1817111, EPI_ISL_1817112, EPI_ISL_1817113, EPI_ISL_1817114, EPI_ISL_1817115, EPI_ISL_1817116, EPI_ISL_1817117, EPI_ISL_1817118, EPI_ISL_1817119, EPI_ISL_1817120, EPI_ISL_1817121, EPI_ISL_1817122, EPI_ISL_1817123, EPI_ISL_1817124, EPI_ISL_1817125, EPI_ISL_1817126, EPI_ISL_1817127, EPI_ISL_1817128, EPI_ISL_1817129, EPI_ISL_1817130, EPI_ISL_1817131, EPI_ISL_1817132, EPI_ISL_1817133, EPI_ISL_1817134, EPI_ISL_1817135, EPI_ISL_1817136, EPI_ISL_1817137, EPI_ISL_1817138, EPI_ISL_1817139, EPI_ISL_1817140, EPI_ISL_1817141, EPI_ISL_1817142, EPI_ISL_1817143, EPI_ISL_1817144, EPI_ISL_1817145, EPI_ISL_1817146, EPI_ISL_1817147, EPI_ISL_1817148, EPI_ISL_1817149, EPI_ISL_1817150, EPI_ISL_1817151, EPI_ISL_1817152, EPI_ISL_1817153, EPI_ISL_1817154, EPI_ISL_1817155, EPI_ISL_1817156, EPI_ISL_1817157, EPI_ISL_1817158, EPI_ISL_1817159, EPI_ISL_1817160, EPI_ISL_1817161, EPI_ISL_1817162, EPI_ISL_1817163, EPI_ISL_1817164, EPI_ISL_1817165, EPI_ISL_1817166, EPI_ISL_1817167, EPI_ISL_1817168                                                                                                                                                                                                                                                                                                                                                                                                                                                                                                                                                                                                                                                                                                                                                                                                                                                                                                                                                                                                                                                                                                                                                                                                                                                                                                                                                                                                                                                                                                                                                                                                                                                                                                                                                                                                                                                                                                                                                                                                                                                                                                                                                                                                                                                                                                                                                                                                                                                                                                           | National Public Health Laboratory, National Centre for Infectious Diseases               | Grace Jie Yin Ngan; Katherine Ching; Lin Cui; Raymond Ter Pin Lin; Royce Ang; Tze Minn Mak; Zhenyang Zhou                                                                                                                        |                                                                                                                                                                                                                                                                                                                                            |
| EPI_ISL_1921165, EPI_ISL_1921288, EPI_ISL_1921739, EPI_ISL_1921764, EPI_ISL_1921765, EPI_ISL_1921768                                                                                                                                                                                                                                                                                                                                                                                                                                                                                                                                                                                                                                                                                                                                                                                                                                                                                                                                                                                                                                                                                                                                                                                                                                                                                                                                                                                                                                                                                                                                                                                                                                                                                                                                                                                                                                                                                                                                                                                                                                                                                                                                                                                                                                                                                                                                                                                                                                                                                                                                                                                                                                                                                                                                                                                                                                                                                                                                                                                                                                                                                                                                                                                                                                                                                                                                                                                                                                                                                                                                                                                                                                                                                                                                                                                                                                                                                                                                                                                                                                                                                                                                                                                                                                                                                                                                                                                                                                                                                                                                                                                                                                                                                                                                                                                                                                                                                                                                                                                                                                                                                                                                                                                                                                                                                                                                                                                                                                                                                                                                                                                                                                                                                                                                                                                                                                                                                                                                                                                                                                                                                                                                                                                                                                                                                                                                                                                                                                                                                                                                                                                                                                                                                                                                                                            | National Public Health Organization                                                      | Institute of Applied Biosciences, Centre for Research and Technology Hellas                                                                                                                                                      | Anastasia Chatzidimitriou et al.                                                                                                                                                                                                                                                                                                           |
| EPI_ISL_1731198, EPI_ISL_1731330, EPI_ISL_1785273, EPI_ISL_1890977, EPI_ISL_1890990, EPI_ISL_1904652, EPI_ISL_1904670, EPI_ISL_1904703, EPI_ISL_1904829, EPI_ISL_1960669, EPI_ISL_1960691, EPI_ISL_1960795, EPI_ISL_1960834, EPI_ISL_1960854, EPI_ISL_1972735, EPI_ISL_1972833, EPI_ISL_2029353, EPI_ISL_2029354, EPI_ISL_2087953, EPI_ISL_2088054, EPI_ISL_2088086, EPI_ISL_2131856, EPI_ISL_2131879, EPI_ISL_2131897, EPI_ISL_2131943, EPI_ISL_2131959, EPI_ISL_2132155, EPI_ISL_2132165, EPI_ISL_2132185, EPI_ISL_2132186, EPI_ISL_2132187, EPI_ISL_2132188, EPI_ISL_2132189, EPI_ISL_2132190, EPI_ISL_2132191, EPI_ISL_2132192, EPI_ISL_2132193, EPI_ISL_2132194, EPI_ISL_2132195, EPI_ISL_2132196, EPI_ISL_2132197, EPI_ISL_2132198, EPI_ISL_2132199, EPI_ISL_2132200, EPI_ISL_2132201, EPI_ISL_2132202, EPI_ISL_2132203, EPI_ISL_2132204, EPI_ISL_2132205, EPI_ISL_2132206, EPI_ISL_2132207, EPI_ISL_2132208, EPI_ISL_2132209, EPI_ISL_2132210, EPI_ISL_2132211, EPI_ISL_2132212, EPI_ISL_2132213, EPI_ISL_2132214, EPI_ISL_2132215, EPI_ISL_2132216, EPI_ISL_2132217, EPI_ISL_2132218, EPI_ISL_2132219, EPI_ISL_2132220, EPI_ISL_2132221, EPI_ISL_2132222, EPI_ISL_2132223, EPI_ISL_2132224, EPI_ISL_2132225, EPI_ISL_2132226, EPI_ISL_2132227, EPI_ISL_2132228, EPI_ISL_2132229, EPI_ISL_2132230, EPI_ISL_2132231, EPI_ISL_2132232, EPI_ISL_2132233, EPI_ISL_2132234, EPI_ISL_2132235, EPI_ISL_2132236, EPI_ISL_2132237, EPI_ISL_2132238, EPI_ISL_2132239, EPI_ISL_2132240, EPI_ISL_2132241, EPI_ISL_2132242, EPI_ISL_2132243, EPI_ISL_2132244, EPI_ISL_2132245, EPI_ISL_2132246, EPI_ISL_2132247, EPI_ISL_2132248, EPI_ISL_2132249, EPI_ISL_2132250, EPI_ISL_2132251, EPI_ISL_2132252, EPI_ISL_2132253, EPI_ISL_2132254, EPI_ISL_2132255, EPI_ISL_2132256, EPI_ISL_2132257, EPI_ISL_2132258, EPI_ISL_2132259, EPI_ISL_2132260, EPI_ISL_2132261, EPI_ISL_2132262, EPI_ISL_2132263, EPI_ISL_2132264, EPI_ISL_2132265, EPI_ISL_2132266, EPI_ISL_2132267, EPI_ISL_2132268, EPI_ISL_2132269, EPI_ISL_2132270, EPI_ISL_2132271, EPI_ISL_2132272, EPI_ISL_2132273, EPI_ISL_2132274, EPI_ISL_2132275, EPI_ISL_2132276, EPI_ISL_2132277, EPI_ISL_2132278, EPI_ISL_2132279, EPI_ISL_2132280, EPI_ISL_2132281, EPI_ISL_2132282, EPI_ISL_2132283, EPI_ISL_2132284, EPI_ISL_2132285, EPI_ISL_2132286, EPI_ISL_2132287, EPI_ISL_2132288, EPI_ISL_2132289, EPI_ISL_2132290, EPI_ISL_2132291, EPI_ISL_2132292, EPI_ISL_2132293, EPI_ISL_2132294, EPI_ISL_2132295, EPI_ISL_2132296, EPI_ISL_2132297, EPI_ISL_2132298, EPI_ISL_2132299, EPI_ISL_2132300, EPI_ISL_2132301, EPI_ISL_2132302, EPI_ISL_2132303, EPI_ISL_2132304, EPI_ISL_2132305, EPI_ISL_2132306, EPI_ISL_2132307, EPI_ISL_2132308, EPI_ISL_2132309, EPI_ISL_2132310, EPI_ISL_2132311, EPI_ISL_2132312, EPI_ISL_2132313, EPI_ISL_2132314, EPI_ISL_2132315, EPI_ISL_2132316, EPI_ISL_2132317, EPI_ISL_2132318, EPI_ISL_2132319, EPI_ISL_2132320, EPI_ISL_2132321, EPI_ISL_2132322, EPI_ISL_2132323, EPI_ISL_2132324, EPI_ISL_2132325, EPI_ISL_2132326, EPI_ISL_2132327, EPI_ISL_2132328, EPI_ISL_2132329, EPI_ISL_2132330, EPI_ISL_2132331, EPI_ISL_2132332, EPI_ISL_2132333, EPI_ISL_2132334, EPI_ISL_2132335, EPI_ISL_2132336, EPI_ISL_2132337, EPI_ISL_2132338, EPI_ISL_2132339, EPI_ISL_2132340, EPI_ISL_2132341, EPI_ISL_2132342, EPI_ISL_2132343, EPI_ISL_2132344, EPI_ISL_2132345, EPI_ISL_2132346, EPI_ISL_2132347, EPI_ISL_2132348, EPI_ISL_2132349, EPI_ISL_2132350, EPI_ISL_2132351, EPI_ISL_2132352, EPI_ISL_2132353, EPI_ISL_2132354, EPI_ISL_2132355, EPI_ISL_2132356, EPI_ISL_2132357, EPI_ISL_2132358, EPI_ISL_2132359, EPI_ISL_2132360, EPI_ISL_2132361, EPI_ISL_2132362, EPI_ISL_2132363, EPI_ISL_2132364, EPI_ISL_2132365, EPI_ISL_2132366, EPI_ISL_2132367, EPI_ISL_2132368, EPI_ISL_2132369, EPI_ISL_2132370, EPI_ISL_2132371, EPI_ISL_2132372, EPI_ISL_2132373, EPI_ISL_2132374, EPI_ISL_2132375, EPI_ISL_2132376, EPI_ISL_2132377, EPI_ISL_2132378, EPI_ISL_2132379, EPI_ISL_2132380, EPI_ISL_2132381, EPI_ISL_2132382, EPI_ISL_2132383, EPI_ISL_2132384, EPI_ISL_2132385, EPI_ISL_2132386, EPI_ISL_2132387, EPI_ISL_2132388, EPI_ISL_2132389, EPI_ISL_2132390, EPI_ISL_2132391, EPI_ISL_2132392, EPI_ISL_2132393, EPI_ISL_2132394, EPI_ISL_2132395, EPI_ISL_2132396, EPI_ISL_2132397, EPI_ISL_2132398, EPI_ISL_2132399, EPI_ISL_2132400, EPI_ISL_2132401, EPI_ISL_2132402, EPI_ISL_2132403, EPI_ISL_2132404, EPI_ISL_2132405, EPI_ISL_2132406, EPI_ISL_2132407, EPI_ISL_2132408, EPI_ISL_2132409, EPI_ISL_2132410, EPI_ISL_2132411, EPI_ISL_2132412, EPI_ISL_2132413, EPI_ISL_2132414, EPI_ISL_2132415, EPI_ISL_2132416, EPI_ISL_2132417, EPI_ISL_2132418, EPI_ISL_2132419, EPI_ISL_2132420, EPI_ISL_2132421, EPI_ISL_2132422, EPI_ISL_2132423, EPI_ISL_2132424, EPI_ISL_2132425, EPI_ISL_2132426, EPI_ISL_2132427, EPI_ISL_2132428, EPI_ISL_2132429, EPI_ISL_2132430, EPI_ISL_2132431, EPI_ISL_2132432, EPI_ISL_2132433, EPI_ISL_2132434, EPI_ISL_2132435, EPI_ISL_2132436, EPI_ISL_2132437, EPI_ISL_2132438, EPI_ISL_2132439, EPI_ISL_2132440, EPI_ISL_2132441, EPI_ISL_2132442, EPI_ISL_2132443, EPI_ISL_2132444, EPI_ISL_2132445, EPI_ISL_2132446, EPI_ISL_2132447, EPI_ISL_2132448, EPI_ISL_2132449, EPI_ISL_2132450, EPI_ISL_2132451, EPI_ISL_2132452, EPI_ISL_2132453, EPI_ISL_2132454, EPI_ISL_2132455, EPI_ISL_2132456, EPI_ISL_2132457, EPI_ISL_2132458, EPI_ISL_2132459, EPI_ISL_2132460, EPI_ISL_2132461, EPI_ISL_2132462, EPI_ISL_2132463, EPI_ISL_2132464, EPI_ISL_2132465, EPI_ISL_2132466, EPI_ISL_2132467, EPI_ISL_2132468, EPI_ISL_2132469, EPI_ISL_2132470, EPI_ISL_2132471, EPI_ISL_2132472, EPI_ISL_2132473, EPI_ISL_2132474, EPI_ISL_2132475, EPI_ISL_2132476, EPI_ISL_2132477, EPI_ISL_2132478, EPI_ISL_2132479, EPI_ISL_2132480, EPI_ISL_2132481, EPI_ISL_2132482, EPI_ISL_2132483, EPI_ISL_2132484, EPI_ISL_2132485, EPI_ISL_2132486, EPI_ISL_2132487, EPI_ISL_2132488, EPI_ISL_2132489, EPI_ISL_2132490, EPI_ISL_2132491, EPI_ISL_2132492, EPI_ISL_2132493, EPI_ISL_2132494, EPI_ISL_2132495, EPI_ISL_2132496, EPI_ISL_2132497, EPI_ISL_2132498, EPI_ISL_2132499, EPI_ISL_2132500, EPI_ISL_2132501, EPI_ISL_2132502, EPI_ISL_2132503, EPI_ISL_2132504, EPI_ISL_2132505, EPI_ISL_2132506, EPI_ISL_2132507, EPI_ISL_2132508, EPI_ISL_2132509, EPI_ISL_2132510, EPI_ISL_2132511, EPI_ISL_2132512, EPI_ISL_2132513, EPI_ISL_2132514, EPI_ISL_2132515, EPI_ISL_2132516, EPI_ISL_2132517, EPI_ISL_2132518, EPI_ISL_2132519, EPI_ISL_2132520, EPI_ISL_2132521, EPI_ISL_2132522, EPI_ISL_2132523, EPI_ISL_2132524, EPI_ISL_2132525, EPI_ISL_2132526, EPI_ISL_2132527, EPI_ISL_2132528, EPI_ISL_2132529, EPI_ISL_2132530, EPI_ISL_2132531, EPI_ISL_2132532, EPI_ISL_2132533, EPI_ISL_2132534, EPI_ISL_2132535, EPI_ISL_2132536, EPI_ISL_2132537, EPI_ISL_2132538, EPI_ISL_2132539, EPI_ISL_2132540, EPI_ISL_2132541, EPI_ISL_2132542, EPI_ISL_2132543, EPI_ISL_2132544, EPI_ISL_213 |                                                                                          |                                                                                                                                                                                                                                  |                                                                                                                                                                                                                                                                                                                                            |

|                                                                                                                                                                                                                                                                                                                                                                                                                                                                                                                                                                                                                                                                                                                                          |                                                                                                                    |                                                                                                                                                                                                                    |                                                                                                                                                                                                                                                                                                                                                                                                                                                                                                                                                                                                                                                                                                                                              |
|------------------------------------------------------------------------------------------------------------------------------------------------------------------------------------------------------------------------------------------------------------------------------------------------------------------------------------------------------------------------------------------------------------------------------------------------------------------------------------------------------------------------------------------------------------------------------------------------------------------------------------------------------------------------------------------------------------------------------------------|--------------------------------------------------------------------------------------------------------------------|--------------------------------------------------------------------------------------------------------------------------------------------------------------------------------------------------------------------|----------------------------------------------------------------------------------------------------------------------------------------------------------------------------------------------------------------------------------------------------------------------------------------------------------------------------------------------------------------------------------------------------------------------------------------------------------------------------------------------------------------------------------------------------------------------------------------------------------------------------------------------------------------------------------------------------------------------------------------------|
| EPI_ISL_2811720, EPI_ISL_2811721, EPI_ISL_2811722, EPI_ISL_2811723, EPI_ISL_2811724, EPI_ISL_2811725, EPI_ISL_2811726, EPI_ISL_2811728, EPI_ISL_2828472, EPI_ISL_2828477, EPI_ISL_2828479, EPI_ISL_2828480, EPI_ISL_2828481, EPI_ISL_2828482, EPI_ISL_2828483, EPI_ISL_2828484, EPI_ISL_2828485, EPI_ISL_2828486, EPI_ISL_2828487, EPI_ISL_2828488, EPI_ISL_2828489, EPI_ISL_2828490, EPI_ISL_2828491, EPI_ISL_2828492, EPI_ISL_2828493, EPI_ISL_2828494, EPI_ISL_2828495, EPI_ISL_2828497, EPI_ISL_2828499, EPI_ISL_2828500, EPI_ISL_2828505, EPI_ISL_2828506, EPI_ISL_2828507, EPI_ISL_2828508, EPI_ISL_2828509, EPI_ISL_2828510, EPI_ISL_2828511, EPI_ISL_2828512, EPI_ISL_2828513, EPI_ISL_2828514, EPI_ISL_2828515, EPI_ISL_2863942 |                                                                                                                    |                                                                                                                                                                                                                    | Pedersen Benedikte Nevjen; Rasmus Riis Kopperud                                                                                                                                                                                                                                                                                                                                                                                                                                                                                                                                                                                                                                                                                              |
| see above                                                                                                                                                                                                                                                                                                                                                                                                                                                                                                                                                                                                                                                                                                                                | Nucleic Acid Testing, National Reference Laboratory                                                                | GIGA Medical Genomics                                                                                                                                                                                              | Bouchra Boujemla; Esperence Umumararungu; Jacob Souopgui; Keith Durkin; Léon Mutesa; Maria Artesi; Marie-Pierre Hayette; Nathalie Renotte; Patrick Tuyisenge; Reuben Sindayiheba; Robert Rutayisire; Sabin Nsanzimana; Swaibu Gatara; Sébastien Bontems; Vincent Bours; Yvan Butera                                                                                                                                                                                                                                                                                                                                                                                                                                                          |
| EPI_ISL_2080768, EPI_ISL_2462074                                                                                                                                                                                                                                                                                                                                                                                                                                                                                                                                                                                                                                                                                                         | OHSU Lab Services Molecular Microbiology Lab                                                                       | Oregon SARS-CoV-2 Genome Sequencing Center                                                                                                                                                                         | Alec J. Hirsch; Andrew C. Adey; Benjamin N. Bimber; Brendan L. O'Connell; Brian J. O'Roak; Cierra LaBlanc; Daniel N. Streblow; Donna Hansel; Guang Fan; Kayla Carter; Ruth V. Nichols; Sally Grindstaff; Sonia Acharya; William B. Messer; Xuan Qin                                                                                                                                                                                                                                                                                                                                                                                                                                                                                          |
| EPI_ISL_1904862, EPI_ISL_1904863, EPI_ISL_1904868, EPI_ISL_1904869, EPI_ISL_1904870, EPI_ISL_2017485, EPI_ISL_2017486, EPI_ISL_2017487, EPI_ISL_2017488, EPI_ISL_2017489, EPI_ISL_2017490                                                                                                                                                                                                                                                                                                                                                                                                                                                                                                                                                |                                                                                                                    |                                                                                                                                                                                                                    |                                                                                                                                                                                                                                                                                                                                                                                                                                                                                                                                                                                                                                                                                                                                              |
| see above                                                                                                                                                                                                                                                                                                                                                                                                                                                                                                                                                                                                                                                                                                                                | OLVZ Aalst                                                                                                         | OLVZ Aalst                                                                                                                                                                                                         | Anne Vankeerberghen                                                                                                                                                                                                                                                                                                                                                                                                                                                                                                                                                                                                                                                                                                                          |
| EPI_ISL_2893809                                                                                                                                                                                                                                                                                                                                                                                                                                                                                                                                                                                                                                                                                                                          | ORIAPOLE                                                                                                           | CNR Virus des Infections Respiratoires - France SUD                                                                                                                                                                | Antonin Bal; Bruno Lina; Gregory Destras; Gwendolyne Burfin; Hadrien Regue; Laurence Josset; Martine Valette; Quentin Semanas                                                                                                                                                                                                                                                                                                                                                                                                                                                                                                                                                                                                                |
| EPI_ISL_2757812, EPI_ISL_2840692, EPI_ISL_2840693, EPI_ISL_2840710, EPI_ISL_2840712, EPI_ISL_2840713, EPI_ISL_2840734                                                                                                                                                                                                                                                                                                                                                                                                                                                                                                                                                                                                                    |                                                                                                                    |                                                                                                                                                                                                                    |                                                                                                                                                                                                                                                                                                                                                                                                                                                                                                                                                                                                                                                                                                                                              |
| see above                                                                                                                                                                                                                                                                                                                                                                                                                                                                                                                                                                                                                                                                                                                                | OSPEDALE CIVILE TERAMO - CENTRO TRASFUSIONALE                                                                      | Istituto Zooprofilattico Sperimentale dell'Abruzzo e Molise "G. Caporale"                                                                                                                                          | Ancora M; Calistri P; Cammà C; Caporale M; Curini V; Delli Compagni E; Di Domenico M; Di Lollo Valeria; Di Pasquale A; Lorusso A; Mangone I; Marcacci M; Puglia I; Rinaldi A; Savini G; Scialabba S                                                                                                                                                                                                                                                                                                                                                                                                                                                                                                                                          |
| EPI_ISL_2372267                                                                                                                                                                                                                                                                                                                                                                                                                                                                                                                                                                                                                                                                                                                          | OUCRU                                                                                                              | OUCRU                                                                                                                                                                                                              | Guy Thwaites; Huynh Trung Trieu; Lam Minh Yen; Le Manh Hung; Le Nguyen Truc Nhu; Le Thi Thu Huong; Le Van Tan; Nghiem My Ngoc; Ngo Ngoc Quang Minh; Nguyen Thanh Dung; Nguyen Thanh Phong; Nguyen Thanh Truong; Nguyen Thi Han Ny; Nguyen Thi thu Hong; Nguyen To Anh; Nguyen Tri Dung; Nguyen Van Vinh Chau; Tran Nguyen Hoang Tu; Tran Tan Thanh                                                                                                                                                                                                                                                                                                                                                                                           |
| EPI_ISL_2406461, EPI_ISL_2801899, EPI_ISL_2801903                                                                                                                                                                                                                                                                                                                                                                                                                                                                                                                                                                                                                                                                                        | Oddar Meanchey Rapid Response Team                                                                                 | Virology Unit, Institut Pasteur du Cambodge                                                                                                                                                                        | Cecile Troupin; Chau Darapeak; Chin Savuth; Erik A Karlsson; Jurre Y Siegers; Kraing Sidonn; Leakhena Pum; Ly Sovann; Veasna Duong; Yi Sengdoeum                                                                                                                                                                                                                                                                                                                                                                                                                                                                                                                                                                                             |
| EPI_ISL_2346118                                                                                                                                                                                                                                                                                                                                                                                                                                                                                                                                                                                                                                                                                                                          | Oregon State Public Health Laboratory                                                                              | Oregon State Public Health Laboratory                                                                                                                                                                              | Eugene Yeboah; John Fontana and Shane Sevey; Laura Tsaknaris; Rafia Razaque; Vanda Makris                                                                                                                                                                                                                                                                                                                                                                                                                                                                                                                                                                                                                                                    |
| EPI_ISL_2707957                                                                                                                                                                                                                                                                                                                                                                                                                                                                                                                                                                                                                                                                                                                          | Originating lab: Wales Specialist Virology Centre Sequencing lab: Pathogen Genomics Unit                           | Public Health Wales Microbiology Cardiff Wales Specialist Virology Centre                                                                                                                                          | Alec Birchley; Alexander Adams; Amy Gaskin; Angela Marchbank; Bree Gatica-Wilcox; Catherine Moore; Jason Coombes; Joanne Watkins; Joel Southgate; Johnathan Evans; Laura Gifford; Lauren Gilbert; Lee Graham; Malorie Perry; Matthew Bull; Nicole Pacchiarini; Sally Corden; Sara Kumziene-Summerhayes; Sara Rey; Sarah Taylor; Simon Cottrell; Sophie Jones; Tom Connor                                                                                                                                                                                                                                                                                                                                                                     |
| EPI_ISL_2760840, EPI_ISL_2760842, EPI_ISL_2760844, EPI_ISL_2768840, EPI_ISL_2768841, EPI_ISL_2768842, EPI_ISL_2768843                                                                                                                                                                                                                                                                                                                                                                                                                                                                                                                                                                                                                    |                                                                                                                    |                                                                                                                                                                                                                    |                                                                                                                                                                                                                                                                                                                                                                                                                                                                                                                                                                                                                                                                                                                                              |
| see above                                                                                                                                                                                                                                                                                                                                                                                                                                                                                                                                                                                                                                                                                                                                | Osaka Institute of Public Health, Morinomiya Center                                                                | Pathogen Genomics Center, National Institute of Infectious Diseases                                                                                                                                                | Kentaro Itokawa; Makoto Kuroda; Masanori Hashino; Rina Tanaka; Tsuyoshi Sekizuka                                                                                                                                                                                                                                                                                                                                                                                                                                                                                                                                                                                                                                                             |
| EPI_ISL_2876423                                                                                                                                                                                                                                                                                                                                                                                                                                                                                                                                                                                                                                                                                                                          | Osaka Prefecture                                                                                                   | Clinical Laboratory Medicine, Kyoto University Graduate School of Medicine                                                                                                                                         | Masaki Yamamoto; Miki Nagao; Yasufumi Matsumura                                                                                                                                                                                                                                                                                                                                                                                                                                                                                                                                                                                                                                                                                              |
| EPI_ISL_2612011                                                                                                                                                                                                                                                                                                                                                                                                                                                                                                                                                                                                                                                                                                                          | Ospedale Cardinale G. Panico                                                                                       | Istituto Zooprofilattico Sperimentale della Puglia e della Basilicata                                                                                                                                              | Bianco A.; Bruno A. R.; Capozzi L.; Del Sambro L.; Difato L.; Parisi A.; Simone D.                                                                                                                                                                                                                                                                                                                                                                                                                                                                                                                                                                                                                                                           |
| EPI_ISL_2602420                                                                                                                                                                                                                                                                                                                                                                                                                                                                                                                                                                                                                                                                                                                          | Ospedale San Giovanni Evangelista                                                                                  | INMI Lazzaro Spallanzani IRCCS                                                                                                                                                                                     | CEM Gruber; D Cerini; D Di Fusco; E Giombini; E Sperandio; F Santini; G Bonfiglio; G Orlandi; O Butera                                                                                                                                                                                                                                                                                                                                                                                                                                                                                                                                                                                                                                       |
| EPI_ISL_2888017                                                                                                                                                                                                                                                                                                                                                                                                                                                                                                                                                                                                                                                                                                                          | Ospedale Sandro Pertini ASL Roma2                                                                                  | Department of General Diagnostics; Department of Virology; Istituto Zooprofilattico Sperimentale del Lazio e della Toscana (IZSLT)                                                                                 | Alessia Franco; Antonella Cersini; Antonio Battisti.; Elena L. Diaconu; Fabiola Feltrin; Giuseppe Manna; Patricia Alba; Raffaella Conti; Teresa Scicluna; Virginia Carfora                                                                                                                                                                                                                                                                                                                                                                                                                                                                                                                                                                   |
| EPI_ISL_1919757, EPI_ISL_2264766, EPI_ISL_2612004, EPI_ISL_2757694, EPI_ISL_2757720                                                                                                                                                                                                                                                                                                                                                                                                                                                                                                                                                                                                                                                      | Ospedale Santa Caterina Novella                                                                                    | Istituto Zooprofilattico Sperimentale della Puglia e della Basilicata                                                                                                                                              | Bianco A.; Bruno A.; Bruno A. R.; Capozzi L.; Del Sambro L.; Difato L.; Parisi A.; Simone D.                                                                                                                                                                                                                                                                                                                                                                                                                                                                                                                                                                                                                                                 |
| EPI_ISL_2466287, EPI_ISL_2612005                                                                                                                                                                                                                                                                                                                                                                                                                                                                                                                                                                                                                                                                                                         | Ospedale Vito Fazzi                                                                                                | Istituto Zooprofilattico Sperimentale della Puglia e della Basilicata                                                                                                                                              | Bianco A.; Bruno A. R.; Capozzi L.; Del Sambro L.; Difato L.; Lobreglio G.; Parisi A.; Simone D.                                                                                                                                                                                                                                                                                                                                                                                                                                                                                                                                                                                                                                             |
| EPI_ISL_2602847                                                                                                                                                                                                                                                                                                                                                                                                                                                                                                                                                                                                                                                                                                                          | Ospedale di Genzano - ASL RM 6                                                                                     | INMI Lazzaro Spallanzani IRCCS                                                                                                                                                                                     | B Bartolini; E Conti; E Sperandio; F Messina; F Santini; G Bonfiglio; G Orlandi; G Tramini; O Butera                                                                                                                                                                                                                                                                                                                                                                                                                                                                                                                                                                                                                                         |
| EPI_ISL_2724999, EPI_ISL_2725002                                                                                                                                                                                                                                                                                                                                                                                                                                                                                                                                                                                                                                                                                                         | Ostfold Hospital Trust - Kales, Centre for Laboratory Medicine, Section for gene technology and infection serology | Norwegian Institute of Public Health, Department of Virology                                                                                                                                                       | Atiya R Ali; Debec Nadia; Engebretsen Serina Beate; Garcia Llorente Ignacio; Hilde Elshaug; Hilde Vollan; Jon Bråte; Kamilla Heddeland Instefjord; Karoline Bragstad; Kathrine Stene-Johansen; Line Victoria Moen; Marie Paulsen Madsen; Olav Hungnes; Pedersen Benedikte Nevjen; Rasmus Riis Kopperud                                                                                                                                                                                                                                                                                                                                                                                                                                       |
| EPI_ISL_2624539                                                                                                                                                                                                                                                                                                                                                                                                                                                                                                                                                                                                                                                                                                                          | Oxford Viromics, NDM, University of Oxford; Oxford University Hospitals; Basingstoke and North Hampshire Hospital  | COVID-19 Genomics UK (COG-UK) Consortium                                                                                                                                                                           | Alex Mobbs; Amy Trebes; Anita Justice; Catrin Moore; Christophe Fraser; David Bonsall; David Buck; Emma Wise; George Macintyre; Jessica Lynch; John Todd; Mariateresa de Cesare; Matilde Mori; Monique Andersson; Nathan Moore; Nick Cortes; Robert Shaw; Stephen Kidd; Tanya Golubchik; Timothy Peto                                                                                                                                                                                                                                                                                                                                                                                                                                        |
| EPI_ISL_2660900                                                                                                                                                                                                                                                                                                                                                                                                                                                                                                                                                                                                                                                                                                                          | PASTEUR MOLECULAR LABORATORY - INSACOG MEGHALAYA                                                                   | CSIR-Centre for Cellular and Molecular Biology-INSACOG                                                                                                                                                             | Amreshwar Vodapalli; Ara Sreenivas; Archana Bharadwaj Siva; B Himasri; Divya Tej Sowpati; E Marak; E Shadap; Karthik Bharadwaj Tallapaka; Lamuk Zaveri; Onkar Kulkarni; Payel Mukherjee; Priya Nurkuthy; R. Lyngdoh; Rakesh K Mishra; Shreekanth Verma; Sofia Banu; Sumedha Avadhanula; Tulasi Nagabandi; Valli Nagalakshmi Undamatla; Vidhyadhari Methuku                                                                                                                                                                                                                                                                                                                                                                                   |
| EPI_ISL_1824607                                                                                                                                                                                                                                                                                                                                                                                                                                                                                                                                                                                                                                                                                                                          | PKC Jagakarsa                                                                                                      | National Institute of Health Research and Development                                                                                                                                                              | Arie Ardiansyah Nugraha; Hana Apsari Pawestri; Hartanti Dian Ikawati; Kartika Dewi Puspa; Krisna Pangesti; Nelly Puspandari; Subangkit; Vivi Setiawaty                                                                                                                                                                                                                                                                                                                                                                                                                                                                                                                                                                                       |
| EPI_ISL_1824604                                                                                                                                                                                                                                                                                                                                                                                                                                                                                                                                                                                                                                                                                                                          | PRVKP FK UI                                                                                                        | National Institute of Health Research and Development                                                                                                                                                              | Arie Ardiansyah Nugraha; Hana Apsari Pawestri; Hartanti Dian Ikawati; Kartika Dewi Puspa; Krisna Pangesti; Nelly Puspandari; Subangkit; Vivi Setiawaty                                                                                                                                                                                                                                                                                                                                                                                                                                                                                                                                                                                       |
| EPI_ISL_1470937, EPI_ISL_2106292                                                                                                                                                                                                                                                                                                                                                                                                                                                                                                                                                                                                                                                                                                         | Pandemic Response Lab - NYC                                                                                        | Pandemic Response Lab, R&D                                                                                                                                                                                         | Cybill del Castillo; Dylan Law; Haiping Hao; Henry Lee; Jon Laurent; Katharine Nelson; Melissa Hopkins; Michael Hammerling; Pradeep Bugga; Shinyoung Clair Kang; Sol Rey; William Ward                                                                                                                                                                                                                                                                                                                                                                                                                                                                                                                                                       |
| EPI_ISL_2832128                                                                                                                                                                                                                                                                                                                                                                                                                                                                                                                                                                                                                                                                                                                          | Parc Tauli Hospital Universitari                                                                                   | Can Ruti SARS-CoV-2 Sequencing Hub (HUGTIP/IrsiCaixa/IGTP)                                                                                                                                                         | Alba Sánchez; Alexia Paris; Anna Not; Antoni E Bordoy; Bonaventura Clotet; Cristina Casañ; David Panisello; Francesc Catala-Moll; Gemma Clara; Ignacio Blanco; Laia Soler; Lauro Sumoy; Marc Noguera-Julian; Maria Casadellà; Mariona Parera; Mercedes Guerrero; Montserrat Giménez; Pere-Joan Cardona; Pilar Armengol; Roger Paredes; Verónica Saludes; and Elisa Martíro on behalf of the Can Ruti SARS-CoV-2 Sequencing Hub                                                                                                                                                                                                                                                                                                               |
| EPI_ISL_2330490, EPI_ISL_2335415, EPI_ISL_2337324, EPI_ISL_2337429, EPI_ISL_2760454, EPI_ISL_2768338, EPI_ISL_2768359, EPI_ISL_2768366, EPI_ISL_2768372, EPI_ISL_2770688, EPI_ISL_2770696, EPI_ISL_2770698, EPI_ISL_2772121                                                                                                                                                                                                                                                                                                                                                                                                                                                                                                              |                                                                                                                    |                                                                                                                                                                                                                    |                                                                                                                                                                                                                                                                                                                                                                                                                                                                                                                                                                                                                                                                                                                                              |
| see above                                                                                                                                                                                                                                                                                                                                                                                                                                                                                                                                                                                                                                                                                                                                | Pathogen Genomics Center, National Institute of Infectious Diseases                                                | Pathogen Genomics Center, National Institute of Infectious Diseases                                                                                                                                                | Kentaro Itokawa; Makoto Kuroda; Masanori Hashino; Rina Tanaka; Tsuyoshi Sekizuka                                                                                                                                                                                                                                                                                                                                                                                                                                                                                                                                                                                                                                                             |
| EPI_ISL_2894148                                                                                                                                                                                                                                                                                                                                                                                                                                                                                                                                                                                                                                                                                                                          | Pathology West - NSW Health Pathology                                                                              | NSW Health Pathology - Institute of Clinical Pathology and Medical Research; Westmead Hospital; University of Sydney                                                                                               | CIDM-PH et al.                                                                                                                                                                                                                                                                                                                                                                                                                                                                                                                                                                                                                                                                                                                               |
| EPI_ISL_2811984                                                                                                                                                                                                                                                                                                                                                                                                                                                                                                                                                                                                                                                                                                                          | Pekan Tajau Health Clinic                                                                                          | Institute for Medical Research, Infectious Disease Research Centre, National Institutes of Health, Ministry of Health Malaysia                                                                                     | Azizan MA; Kamel K; Mohd Zawawi Z; Ramly N; Robert F; Suppliah J; Thayan R                                                                                                                                                                                                                                                                                                                                                                                                                                                                                                                                                                                                                                                                   |
| EPI_ISL_2558052                                                                                                                                                                                                                                                                                                                                                                                                                                                                                                                                                                                                                                                                                                                          | Philippine Red Cross - Clark Molecular Laboratory                                                                  | Philippine Genome Center                                                                                                                                                                                           | Alethea R. de Guzman; Anna Ong-Lim; Arianne A. Zamora; Asia Louisa U. Chong; Benedict A. Maralit; Candice Francheska B. Tambaoan; Carlo M. Lapid; Celia Carlos; Devon Ray Pacial; Edsel Maurice Salvaña; El King D. Morado; Elcid Aaron R. Panglinan; Eva Maria Cutiongco-de la Paz; Francis A. Tablizo; Irish Coleen A. Asin; Jaime C. Montoya; Jan Michael C. Yap; Jo-Hannah S. Llamas; John Q. Wong; Joshua Gregor A. Dizon; Juan Antonio R. Magalang; Karol Sophia Agape R. Padilla; Kenneth M. Kim; Kris P. Punayan; Marc Edsel C. Ayes; Maria Rosario Singh-Vergeire and Cynthia P. Saloma; Maria Sofia L. Yangzon; Marissa Alejandria; Razel Nikka M. Hao; Renato Jacinto Q. Mantaring; Rianna Patricia S. Cruz; Sheila Mae M. Araiza |
| EPI_ISL_2013035                                                                                                                                                                                                                                                                                                                                                                                                                                                                                                                                                                                                                                                                                                                          | Plateforme Covid IDF, site Broussais                                                                               | HEGP - Laboratoire de Virologie                                                                                                                                                                                    | David Veyer; Héliène Péré; Julien Puech; Maxime Wack; Nabil Gastli; Nicolas Robillard; Sandrine Imbeaud                                                                                                                                                                                                                                                                                                                                                                                                                                                                                                                                                                                                                                      |
| EPI_ISL_2346306, EPI_ISL_2397207, EPI_ISL_2521971                                                                                                                                                                                                                                                                                                                                                                                                                                                                                                                                                                                                                                                                                        | Plateforme de testing Namuroise                                                                                    | Plateforme de testing Namuroise                                                                                                                                                                                    | Degosserie Jonathan; Demars Aurore; Denis Olivier; Lesly Nyinkeu Kemamen; Maschietto Céline; Mullier François; Nicolas Gilliard; Nobis Chloé; Otto Gaetan                                                                                                                                                                                                                                                                                                                                                                                                                                                                                                                                                                                    |
| EPI_ISL_1745199, EPI_ISL_2047647, EPI_ISL_2047650, EPI_ISL_2047652, EPI_ISL_2047653, EPI_ISL_2047654, EPI_ISL_2047656, EPI_ISL_2131297, EPI_ISL_2131303, EPI_ISL_2131345, EPI_ISL_2246063, EPI_ISL_2246064, EPI_ISL_2246115, EPI_ISL_2272671, EPI_ISL_2272672, EPI_ISL_2272678, EPI_ISL_2272690, EPI_ISL_2272775, EPI_ISL_2292722, EPI_ISL_2545603, EPI_ISL_2545612, EPI_ISL_2545635, EPI_ISL_2626861, EPI_ISL_2626890, EPI_ISL_2628111, EPI_ISL_2714807, EPI_ISL_2861583, EPI_ISL_2861585, EPI_ISL_2861660, EPI_ISL_2861662                                                                                                                                                                                                             |                                                                                                                    |                                                                                                                                                                                                                    |                                                                                                                                                                                                                                                                                                                                                                                                                                                                                                                                                                                                                                                                                                                                              |
| see above                                                                                                                                                                                                                                                                                                                                                                                                                                                                                                                                                                                                                                                                                                                                | Platform BIS UZA/UAntwerpen                                                                                        | Labo Klinische Biologie, UZA                                                                                                                                                                                       | Basil Britto Xavier; Christine Lammens; Herman Goossens; Ines Verbesselt; Jasmine Coppens; Kathleen Holemans; Marie Le Mercier; Veerle Matheussens                                                                                                                                                                                                                                                                                                                                                                                                                                                                                                                                                                                           |
| EPI_ISL_2550758, EPI_ISL_2550759                                                                                                                                                                                                                                                                                                                                                                                                                                                                                                                                                                                                                                                                                                         | Port Dickson Hospital                                                                                              | Institute for Medical Research, Infectious Disease Research Centre, National Institutes of Health, Ministry of Health Malaysia                                                                                     | Azizan MA; Kamel K; Mohd Zawawi Z; Ramly N; Robert F; Suppliah J; Thayan R                                                                                                                                                                                                                                                                                                                                                                                                                                                                                                                                                                                                                                                                   |
| EPI_ISL_2657216                                                                                                                                                                                                                                                                                                                                                                                                                                                                                                                                                                                                                                                                                                                          | Pracownia Biologii Molekularnej Laboratorium Centralne SPZOZ                                                       | 1. Tricity SARS-CoV-2 sequencing consortium: University of Gdansk, Medical University of Gdansk, Vaxican Ltd., Invicta Ltd. 2. National Institute of Public Health - National Institute of Hygiene, Warsaw, Poland | Celina Cybulska; Karolina Gackowska; Katarzyna Groth; Katarzyna Zacharczuk; Krystyna Bienkowska Szewczyk; Lukasz Rabalski; Maciej Grzybek; Maciej Kosinski; Magdalena Nowakowska; Marcin Lubocki; Małgorzata Sadkowska-Todys; Tomasz Wolkowicz                                                                                                                                                                                                                                                                                                                                                                                                                                                                                               |
| EPI_ISL_2264831, EPI_ISL_2466280, EPI_ISL_2466281, EPI_ISL_2466284, EPI_ISL_2532472, EPI_ISL_2611988, EPI_ISL_2611990, EPI_ISL_2611991, EPI_ISL_2611995, EPI_ISL_2757685, EPI_ISL_2820736, EPI_ISL_2820738                                                                                                                                                                                                                                                                                                                                                                                                                                                                                                                               |                                                                                                                    |                                                                                                                                                                                                                    |                                                                                                                                                                                                                                                                                                                                                                                                                                                                                                                                                                                                                                                                                                                                              |
| see above                                                                                                                                                                                                                                                                                                                                                                                                                                                                                                                                                                                                                                                                                                                                | Presidio di Brindisi Di Summa - Perrino                                                                            | Istituto Zooprofilattico Sperimentale della Puglia e della Basilicata                                                                                                                                              | Bianco A.; Capozzi L.; Del Sambro L.; Difato L.; Giannico A.; Manzari C.; Parisi A.; Pennuzzi G.; Pesole G.; Ridolfi D.; Santoro A.; Simone D.                                                                                                                                                                                                                                                                                                                                                                                                                                                                                                                                                                                               |
| EPI_ISL_1789673                                                                                                                                                                                                                                                                                                                                                                                                                                                                                                                                                                                                                                                                                                                          | Pro-Vitam Diagnostics and Research Laboratory                                                                      | Pro-Vitam Diagnostics and Research Laboratory                                                                                                                                                                      | Istvan Horvath; Kinga Rakosi; Monika Korodi; Szilard N. Fejer; Zsuzsanna Jenei                                                                                                                                                                                                                                                                                                                                                                                                                                                                                                                                                                                                                                                               |
| EPI_ISL_2543667                                                                                                                                                                                                                                                                                                                                                                                                                                                                                                                                                                                                                                                                                                                          | Provincial Public Health Reference Laboratory (PPHRL) P&SHD                                                        | Provincial Public Health Reference Laboratory (PPHRL) P&SHD                                                                                                                                                        | ANDLEEB HANIF                                                                                                                                                                                                                                                                                                                                                                                                                                                                                                                                                                                                                                                                                                                                |
| EPI_ISL_2341869, EPI_ISL_2341881, EPI_ISL_2341890, EPI_ISL_2341898, EPI_ISL_2341907                                                                                                                                                                                                                                                                                                                                                                                                                                                                                                                                                                                                                                                      | Pt. Jawahar Lal Nehru Memorial Medical College, Raipur                                                             | Institute of Life Sciences - INSACOG                                                                                                                                                                               | Ajay Parida; Amol M. Kanampalliwar; Arup Ghosh; Atimukta Jha; INSACOG Consortium; Omprakash Shiriwas; Punit Prasad; Rajeeb Swain; Rupesh Dash; Safal Walia; Sana Fatma; Shifu Aggarwal; Sunil K. Raghav                                                                                                                                                                                                                                                                                                                                                                                                                                                                                                                                      |
| EPI_ISL_2709998                                                                                                                                                                                                                                                                                                                                                                                                                                                                                                                                                                                                                                                                                                                          | Public Health Authority of the Slovak Republic                                                                     | Laboratory of Genomics and Bioinformatics, Comenius University Science Park                                                                                                                                        | Anna Gičová; Diana Rusňáková; Jakub Styk; Jaroslav Budiš; Miroslav Böhmer; Tatiana Sedláčková; Tomáš Szemes                                                                                                                                                                                                                                                                                                                                                                                                                                                                                                                                                                                                                                  |
| EPI_ISL_2699510                                                                                                                                                                                                                                                                                                                                                                                                                                                                                                                                                                                                                                                                                                                          | Public Health Laboratory, Minnesota Department of Health                                                           | University of Minnesota Genomics Center                                                                                                                                                                            | Corbin Dirkx; Daryl M. Gohl; Jaquelyn Kuriger-Laber; John Garbe; and Sean Wang                                                                                                                                                                                                                                                                                                                                                                                                                                                                                                                                                                                                                                                               |
| EPI_ISL_2433928                                                                                                                                                                                                                                                                                                                                                                                                                                                                                                                                                                                                                                                                                                                          | Public Health Virology-Forensic and Scientific Services                                                            | Public Health Virology-Forensic and Scientific Services                                                                                                                                                            | Alyssa T. Pyke                                                                                                                                                                                                                                                                                                                                                                                                                                                                                                                                                                                                                                                                                                                               |
| EPI_ISL_2801898                                                                                                                                                                                                                                                                                                                                                                                                                                                                                                                                                                                                                                                                                                                          | Pursat Rapid Response Team                                                                                         | Virology Unit, Institut Pasteur du Cambodge                                                                                                                                                                        | Cecile Troupin; Chau Darapeak; Chin Savuth; Erik A Karlsson; Jurre Y Siegers; Kraing Sidonn; Leakhena Pum; Ly Sovann; Veasna Duong; Yi Sengdoeum                                                                                                                                                                                                                                                                                                                                                                                                                                                                                                                                                                                             |
| EPI_ISL_2854780                                                                                                                                                                                                                                                                                                                                                                                                                                                                                                                                                                                                                                                                                                                          | Puskesmas kec Menteng                                                                                              | National Institute of Health Research and Development                                                                                                                                                              | Arie Ardiansyah Nugraha; Hana Apsari Pawestri; Hartanti Dian Ikawati; Kartika Dewi Puspa; Krisna Pangesti; Nelly Puspandari; Subangkit; Triyani Soekarso; Vivi Setiawaty                                                                                                                                                                                                                                                                                                                                                                                                                                                                                                                                                                     |



|                                                                                                                                                                                                                                                                                                                                                                                                                                                                                                                                                                                                                                                                                                                                                                                                                                                                                                                                                                                                                                                                                                                                                                                                                                                                                                                                                                                                                                                                                                                                                                                                                                                                                                                                                                                                                                                                                                                                                                                                                                                                                                                                                                                                                                                                                                                                                                                                                                                                                                                                                                                                                                                                       |                                                |                                                                                                                                                                                                                                                                                                                                                                                                                                                                                     |                                                                                                                                                                                                                                                                                                                                                                                                                                                           |
|-----------------------------------------------------------------------------------------------------------------------------------------------------------------------------------------------------------------------------------------------------------------------------------------------------------------------------------------------------------------------------------------------------------------------------------------------------------------------------------------------------------------------------------------------------------------------------------------------------------------------------------------------------------------------------------------------------------------------------------------------------------------------------------------------------------------------------------------------------------------------------------------------------------------------------------------------------------------------------------------------------------------------------------------------------------------------------------------------------------------------------------------------------------------------------------------------------------------------------------------------------------------------------------------------------------------------------------------------------------------------------------------------------------------------------------------------------------------------------------------------------------------------------------------------------------------------------------------------------------------------------------------------------------------------------------------------------------------------------------------------------------------------------------------------------------------------------------------------------------------------------------------------------------------------------------------------------------------------------------------------------------------------------------------------------------------------------------------------------------------------------------------------------------------------------------------------------------------------------------------------------------------------------------------------------------------------------------------------------------------------------------------------------------------------------------------------------------------------------------------------------------------------------------------------------------------------------------------------------------------------------------------------------------------------|------------------------------------------------|-------------------------------------------------------------------------------------------------------------------------------------------------------------------------------------------------------------------------------------------------------------------------------------------------------------------------------------------------------------------------------------------------------------------------------------------------------------------------------------|-----------------------------------------------------------------------------------------------------------------------------------------------------------------------------------------------------------------------------------------------------------------------------------------------------------------------------------------------------------------------------------------------------------------------------------------------------------|
| EPI_ISL_26236291,<br>EPI_ISL_2624033,<br>EPI_ISL_2624291                                                                                                                                                                                                                                                                                                                                                                                                                                                                                                                                                                                                                                                                                                                                                                                                                                                                                                                                                                                                                                                                                                                                                                                                                                                                                                                                                                                                                                                                                                                                                                                                                                                                                                                                                                                                                                                                                                                                                                                                                                                                                                                                                                                                                                                                                                                                                                                                                                                                                                                                                                                                              | Quadram Institute Bioscience                   | COVID-19 Genomics UK (COG-UK) Consortium                                                                                                                                                                                                                                                                                                                                                                                                                                            | Alexander J Trotter; Alison E. Mather; Alp Aydin; Ana P. Tedim; Anastasia Kolyva; Andrew Bell; Andrew J. Page; Claire Stuart; Dave J. Baker; Gemma L. Kay; John Wain; Justin O'Grady; Leonardo de Oliveira Martins; Lizzie Meadows; Maria Diaz; Mark Webber; Muhammed Yasin; Nabil-Fareed Alikhan; Ngozi Elumogo; Nicholas M. Thomson; Rachael Stanley; Rachel Gilroy; Reenesh Prakash; Samir Dervisevic; Samuel Bloomfield; Steven Rudder; Thanh Le-Viet |
| EPI_ISL_1938308, EPI_ISL_2274249, EPI_ISL_2385968, EPI_ISL_2385973, EPI_ISL_2507084, EPI_ISL_2507085, EPI_ISL_2507090, EPI_ISL_2507092, EPI_ISL_2507093, EPI_ISL_2507094, EPI_ISL_2507095, EPI_ISL_2507096, EPI_ISL_2603819, EPI_ISL_2603820, EPI_ISL_2603821, EPI_ISL_2661518                                                                                                                                                                                                                                                                                                                                                                                                                                                                                                                                                                                                                                                                                                                                                                                                                                                                                                                                                                                                                                                                                                                                                                                                                                                                                                                                                                                                                                                                                                                                                                                                                                                                                                                                                                                                                                                                                                                                                                                                                                                                                                                                                                                                                                                                                                                                                                                        | see above                                      | Queensland Health Forensic and Scientific Services                                                                                                                                                                                                                                                                                                                                                                                                                                  | Son Nguyen                                                                                                                                                                                                                                                                                                                                                                                                                                                |
| EPI_ISL_1648249, EPI_ISL_1753105, EPI_ISL_1798096, EPI_ISL_1924930, EPI_ISL_1989866, EPI_ISL_2133309, EPI_ISL_2133456, EPI_ISL_2143008, EPI_ISL_2143023, EPI_ISL_2143449, EPI_ISL_2204104, EPI_ISL_2247111, EPI_ISL_2268814, EPI_ISL_2268940, EPI_ISL_2268970, EPI_ISL_2269027, EPI_ISL_2397470, EPI_ISL_2440841, EPI_ISL_2529080, EPI_ISL_2529083, EPI_ISL_2529283, EPI_ISL_2652362, EPI_ISL_2868958, EPI_ISL_2869256, EPI_ISL_2869260, EPI_ISL_2869263, EPI_ISL_2869298, EPI_ISL_2869300, EPI_ISL_2869306, EPI_ISL_2869325, EPI_ISL_2869330, EPI_ISL_2869376, EPI_ISL_2869402, EPI_ISL_2869441, EPI_ISL_2869462, EPI_ISL_2869481, EPI_ISL_2869493, EPI_ISL_2869530, EPI_ISL_2869552, EPI_ISL_2869574, EPI_ISL_2869579, EPI_ISL_2869591, EPI_ISL_2869597, EPI_ISL_2869607, EPI_ISL_2869627, EPI_ISL_2869632, EPI_ISL_2870330, EPI_ISL_2870527, EPI_ISL_2870548, EPI_ISL_2870598, EPI_ISL_2870663, EPI_ISL_2870684, EPI_ISL_2870730, EPI_ISL_2870733, EPI_ISL_2870842, EPI_ISL_2870909, EPI_ISL_2870915, EPI_ISL_2870982, EPI_ISL_2871026, EPI_ISL_2871075, EPI_ISL_2871379, EPI_ISL_2871515, EPI_ISL_2871620, EPI_ISL_2871980, EPI_ISL_2871992, EPI_ISL_2872103, EPI_ISL_2873875, EPI_ISL_2873902, EPI_ISL_2873907, EPI_ISL_2873925, EPI_ISL_2873950, EPI_ISL_2873951, EPI_ISL_2873955, EPI_ISL_2873965, EPI_ISL_2873995, EPI_ISL_2873996, EPI_ISL_2873995, EPI_ISL_2873996, EPI_ISL_2874010, EPI_ISL_2874030, EPI_ISL_2874031, EPI_ISL_2874039, EPI_ISL_2874045, EPI_ISL_2874063, EPI_ISL_2874067, EPI_ISL_2874070, EPI_ISL_2874088, EPI_ISL_2874100, EPI_ISL_2874115, EPI_ISL_2874125, EPI_ISL_2874129, EPI_ISL_2874168, EPI_ISL_2874186, EPI_ISL_2874190, EPI_ISL_2874218, EPI_ISL_2874222, EPI_ISL_2874226, EPI_ISL_2874240, EPI_ISL_2874261, EPI_ISL_2874341, EPI_ISL_2874368, EPI_ISL_2874386, EPI_ISL_2874432, EPI_ISL_2874445, EPI_ISL_2874574, EPI_ISL_2874587, EPI_ISL_2874661, EPI_ISL_2874702, EPI_ISL_2874704, EPI_ISL_2874705, EPI_ISL_2874710, EPI_ISL_2874712, EPI_ISL_2874715, EPI_ISL_2874725, EPI_ISL_2874726, EPI_ISL_2874730, EPI_ISL_2874773, EPI_ISL_2874775, EPI_ISL_2874781, EPI_ISL_2874799, EPI_ISL_2874804, EPI_ISL_2874821, EPI_ISL_2874824, EPI_ISL_2874845, EPI_ISL_2874864, EPI_ISL_2874873, EPI_ISL_2874891, EPI_ISL_2874901, EPI_ISL_2874906, EPI_ISL_2874913, EPI_ISL_2874914, EPI_ISL_2874933, EPI_ISL_2874959, EPI_ISL_2874961, EPI_ISL_2874981, EPI_ISL_2874989, EPI_ISL_2874990, EPI_ISL_2874994, EPI_ISL_2875015, EPI_ISL_2875026, EPI_ISL_2875051, EPI_ISL_2875054, EPI_ISL_2875100, EPI_ISL_2875113, EPI_ISL_2875120, EPI_ISL_2875126, EPI_ISL_2875128, EPI_ISL_2875136, EPI_ISL_2875138, EPI_ISL_2875140, EPI_ISL_2875164 | see above                                      | Queensland Health Forensic and Scientific Services                                                                                                                                                                                                                                                                                                                                                                                                                                  |                                                                                                                                                                                                                                                                                                                                                                                                                                                           |
|                                                                                                                                                                                                                                                                                                                                                                                                                                                                                                                                                                                                                                                                                                                                                                                                                                                                                                                                                                                                                                                                                                                                                                                                                                                                                                                                                                                                                                                                                                                                                                                                                                                                                                                                                                                                                                                                                                                                                                                                                                                                                                                                                                                                                                                                                                                                                                                                                                                                                                                                                                                                                                                                       | Quest Diagnostics Incorporated                 | Centers for Disease Control and Prevention Division of Viral Diseases,<br>Pathogen Discovery                                                                                                                                                                                                                                                                                                                                                                                        | A. Gerasimova; A. Perez; Adrian Paskey; B. Anderson; Benjamin Rambo-Martin; Christopher Gulvick; Clinton R. Paden; Dakota Howard; Darlene Wagner; Dhwani Batra; Duncan MacCannell; F. Lacbawan; I. A. Shlyakhter; Jason Caravas; K.E. Livingston; Kara Moser; L.E. Bernstein; M. Hua; Matthew Schmeerer; P. Tanpalboon; Peter W. Cook; R. M. Kagan; R. Owen; R. V. Rolando; S. H. Rosenthal; Scott Sammons; Shatavia Morrison; Y. Liu; Yvette Unoarumhi   |
| EPI_ISL_2531894,<br>EPI_ISL_2531897,<br>EPI_ISL_2531901                                                                                                                                                                                                                                                                                                                                                                                                                                                                                                                                                                                                                                                                                                                                                                                                                                                                                                                                                                                                                                                                                                                                                                                                                                                                                                                                                                                                                                                                                                                                                                                                                                                                                                                                                                                                                                                                                                                                                                                                                                                                                                                                                                                                                                                                                                                                                                                                                                                                                                                                                                                                               | RIIP                                           | National Reference Center for Viruses of Respiratory Infections, Institut Pasteur, Paris                                                                                                                                                                                                                                                                                                                                                                                            | Angela Brisebarre; Camille Capel; Christophe Malabat; Corinne Maufrais; Etienne Simon-Lorière; Frédéric Lemoine; Louise Lefrançois; Marion Barbet; Maud Vanpeene; Méline Bizard; Stéphanie Guyomard-Rabenirina; Sylvie Behillili; Sylvie Van der Werf; Vincent Enouf                                                                                                                                                                                      |
| EPI_ISL_2784685                                                                                                                                                                                                                                                                                                                                                                                                                                                                                                                                                                                                                                                                                                                                                                                                                                                                                                                                                                                                                                                                                                                                                                                                                                                                                                                                                                                                                                                                                                                                                                                                                                                                                                                                                                                                                                                                                                                                                                                                                                                                                                                                                                                                                                                                                                                                                                                                                                                                                                                                                                                                                                                       | RM3                                            | National Institute for Infectious Diseases (INMI) L. Spallanzani I.R.C.C.S                                                                                                                                                                                                                                                                                                                                                                                                          | A Di Caro; B Bartolini; CEM Gruber; E Giombini; F Messina; F Santini; G Bonfiglio; M Rueca; MR Capobianchi; O Butera                                                                                                                                                                                                                                                                                                                                      |
| EPI_ISL_2868902,<br>EPI_ISL_2868910                                                                                                                                                                                                                                                                                                                                                                                                                                                                                                                                                                                                                                                                                                                                                                                                                                                                                                                                                                                                                                                                                                                                                                                                                                                                                                                                                                                                                                                                                                                                                                                                                                                                                                                                                                                                                                                                                                                                                                                                                                                                                                                                                                                                                                                                                                                                                                                                                                                                                                                                                                                                                                   | RS Cinta Kasih Tzu Chi                         | National Institute of Health Research and Development                                                                                                                                                                                                                                                                                                                                                                                                                               | Arie Ardiansyah Nugraha; Hana Aparsi Pawestri; Hartanti Dian Ikawati; Kartika Dewi Puspa; Krisna Pangesti; Nelly Puspandari; Subangkit; Triyani Soekarso; Vivi Setiawaty                                                                                                                                                                                                                                                                                  |
| EPI_ISL_2868915                                                                                                                                                                                                                                                                                                                                                                                                                                                                                                                                                                                                                                                                                                                                                                                                                                                                                                                                                                                                                                                                                                                                                                                                                                                                                                                                                                                                                                                                                                                                                                                                                                                                                                                                                                                                                                                                                                                                                                                                                                                                                                                                                                                                                                                                                                                                                                                                                                                                                                                                                                                                                                                       | RS Gading Pluit                                | National Institute of Health Research and Development                                                                                                                                                                                                                                                                                                                                                                                                                               | Arie Ardiansyah Nugraha; Hana Aparsi Pawestri; Hartanti Dian Ikawati; Kartika Dewi Puspa; Krisna Pangesti; Nelly Puspandari; Subangkit; Triyani Soekarso; Vivi Setiawaty                                                                                                                                                                                                                                                                                  |
| EPI_ISL_2614728                                                                                                                                                                                                                                                                                                                                                                                                                                                                                                                                                                                                                                                                                                                                                                                                                                                                                                                                                                                                                                                                                                                                                                                                                                                                                                                                                                                                                                                                                                                                                                                                                                                                                                                                                                                                                                                                                                                                                                                                                                                                                                                                                                                                                                                                                                                                                                                                                                                                                                                                                                                                                                                       | RS Grha Kedyo                                  | Eijkman Institute for Molecular Biology, National Research and Innovation Agency                                                                                                                                                                                                                                                                                                                                                                                                    | Amin Soebandrio; Edison Johar; Frilasita A Yudhaputri; Hidayat Trimarsanto; Iskandar Adnan; Khin Saw Myint; Lidwina Piliiani; Lydia V. Panggalo; Muhammad Rezki Rasyak; Safarina G Malik; Sukma Oktavianthi; Willy Agustine                                                                                                                                                                                                                               |
| EPI_ISL_2614736                                                                                                                                                                                                                                                                                                                                                                                                                                                                                                                                                                                                                                                                                                                                                                                                                                                                                                                                                                                                                                                                                                                                                                                                                                                                                                                                                                                                                                                                                                                                                                                                                                                                                                                                                                                                                                                                                                                                                                                                                                                                                                                                                                                                                                                                                                                                                                                                                                                                                                                                                                                                                                                       | RS Hermina Depok                               | Eijkman Institute for Molecular Biology, National Research and Innovation Agency                                                                                                                                                                                                                                                                                                                                                                                                    | Amin Soebandrio; Edison Johar; Frilasita A Yudhaputri; Hidayat Trimarsanto; Iskandar Adnan; Khin Saw Myint; Lidwina Piliiani; Lydia V. Panggalo; Muhammad Rezki Rasyak; Safarina G Malik; Sukma Oktavianthi; Willy Agustine                                                                                                                                                                                                                               |
| EPI_ISL_2854724                                                                                                                                                                                                                                                                                                                                                                                                                                                                                                                                                                                                                                                                                                                                                                                                                                                                                                                                                                                                                                                                                                                                                                                                                                                                                                                                                                                                                                                                                                                                                                                                                                                                                                                                                                                                                                                                                                                                                                                                                                                                                                                                                                                                                                                                                                                                                                                                                                                                                                                                                                                                                                                       | RS Hermina Depok                               | National Institute of Health Research and Development                                                                                                                                                                                                                                                                                                                                                                                                                               | ; Arie Ardiansyah Nugraha; Hana Aparsi Pawestri; Hartanti Dian Ikawati; Kartika Dewi Puspa; Krisna Pangesti; Nelly Puspandari; Subangkit; Triyani Soekarso; Vivi Setiawaty                                                                                                                                                                                                                                                                                |
| EPI_ISL_2617518                                                                                                                                                                                                                                                                                                                                                                                                                                                                                                                                                                                                                                                                                                                                                                                                                                                                                                                                                                                                                                                                                                                                                                                                                                                                                                                                                                                                                                                                                                                                                                                                                                                                                                                                                                                                                                                                                                                                                                                                                                                                                                                                                                                                                                                                                                                                                                                                                                                                                                                                                                                                                                                       | RS Hermina Kemayoran                           | National Institute of Health Research and Development                                                                                                                                                                                                                                                                                                                                                                                                                               | Arie Ardiansyah Nugraha; Hana Aparsi Pawestri; Hartanti Dian Ikawati; Kartika Dewi Puspa; Krisna Pangesti; Nelly Puspandari; Subangkit; Triyani Soekarso; Vivi Setiawaty                                                                                                                                                                                                                                                                                  |
| EPI_ISL_2617523                                                                                                                                                                                                                                                                                                                                                                                                                                                                                                                                                                                                                                                                                                                                                                                                                                                                                                                                                                                                                                                                                                                                                                                                                                                                                                                                                                                                                                                                                                                                                                                                                                                                                                                                                                                                                                                                                                                                                                                                                                                                                                                                                                                                                                                                                                                                                                                                                                                                                                                                                                                                                                                       | RS IMC Bintaro                                 | National Institute of Health Research and Development                                                                                                                                                                                                                                                                                                                                                                                                                               | Arie Ardiansyah Nugraha; Hana Aparsi Pawestri; Hartanti Dian Ikawati; Kartika Dewi Puspa; Krisna Pangesti; Nelly Puspandari; Subangkit; Triyani Soekarso; Vivi Setiawaty                                                                                                                                                                                                                                                                                  |
| EPI_ISL_2854748                                                                                                                                                                                                                                                                                                                                                                                                                                                                                                                                                                                                                                                                                                                                                                                                                                                                                                                                                                                                                                                                                                                                                                                                                                                                                                                                                                                                                                                                                                                                                                                                                                                                                                                                                                                                                                                                                                                                                                                                                                                                                                                                                                                                                                                                                                                                                                                                                                                                                                                                                                                                                                                       | RS Ichsan Medical Centre Bintaro Tangsel       | National Institute of Health Research and Development                                                                                                                                                                                                                                                                                                                                                                                                                               | ; Arie Ardiansyah Nugraha; Hana Aparsi Pawestri; Hartanti Dian Ikawati; Kartika Dewi Puspa; Krisna Pangesti; Nelly Puspandari; Subangkit; Triyani Soekarso; Vivi Setiawaty                                                                                                                                                                                                                                                                                |
| EPI_ISL_2854749,<br>EPI_ISL_2868905                                                                                                                                                                                                                                                                                                                                                                                                                                                                                                                                                                                                                                                                                                                                                                                                                                                                                                                                                                                                                                                                                                                                                                                                                                                                                                                                                                                                                                                                                                                                                                                                                                                                                                                                                                                                                                                                                                                                                                                                                                                                                                                                                                                                                                                                                                                                                                                                                                                                                                                                                                                                                                   | RS Kartika Pulomas                             | National Institute of Health Research and Development                                                                                                                                                                                                                                                                                                                                                                                                                               | Arie Ardiansyah Nugraha; Hana Aparsi Pawestri; Hartanti Dian Ikawati; Kartika Dewi Puspa; Krisna Pangesti; Nelly Puspandari; Subangkit; Triyani Soekarso; Vivi Setiawaty                                                                                                                                                                                                                                                                                  |
| EPI_ISL_2709390,<br>EPI_ISL_2709395                                                                                                                                                                                                                                                                                                                                                                                                                                                                                                                                                                                                                                                                                                                                                                                                                                                                                                                                                                                                                                                                                                                                                                                                                                                                                                                                                                                                                                                                                                                                                                                                                                                                                                                                                                                                                                                                                                                                                                                                                                                                                                                                                                                                                                                                                                                                                                                                                                                                                                                                                                                                                                   | RS OMNI Pulomas                                | Eijkman Institute for Molecular Biology, National Research and Innovation Agency                                                                                                                                                                                                                                                                                                                                                                                                    | Amin Soebandrio; Edison Johar; Frilasita A Yudhaputri; Hidayat Trimarsanto; Iskandar Adnan; Khin Saw Myint; Lidwina Piliiani; Lydia V. Panggalo; Muhammad Rezki Rasyak; Safarina G Malik; Sukma Oktavianthi; Willy Agustine                                                                                                                                                                                                                               |
| EPI_ISL_2614725, EPI_ISL_2614726, EPI_ISL_2614727, EPI_ISL_2614731, EPI_ISL_2709366, EPI_ISL_2709367, EPI_ISL_2709368                                                                                                                                                                                                                                                                                                                                                                                                                                                                                                                                                                                                                                                                                                                                                                                                                                                                                                                                                                                                                                                                                                                                                                                                                                                                                                                                                                                                                                                                                                                                                                                                                                                                                                                                                                                                                                                                                                                                                                                                                                                                                                                                                                                                                                                                                                                                                                                                                                                                                                                                                 | see above                                      | Eijkman Institute for Molecular Biology, National Research and Innovation Agency                                                                                                                                                                                                                                                                                                                                                                                                    | Amin Soebandrio; Edison Johar; Frilasita A Yudhaputri; Hidayat Trimarsanto; Iskandar Adnan; Khin Saw Myint; Lidwina Piliiani; Lydia V. Panggalo; Muhammad Rezki Rasyak; Safarina G Malik; Sukma Oktavianthi; Willy Agustine                                                                                                                                                                                                                               |
| EPI_ISL_2709394                                                                                                                                                                                                                                                                                                                                                                                                                                                                                                                                                                                                                                                                                                                                                                                                                                                                                                                                                                                                                                                                                                                                                                                                                                                                                                                                                                                                                                                                                                                                                                                                                                                                                                                                                                                                                                                                                                                                                                                                                                                                                                                                                                                                                                                                                                                                                                                                                                                                                                                                                                                                                                                       | RS Permata Cibubur                             | Eijkman Institute for Molecular Biology, National Research and Innovation Agency                                                                                                                                                                                                                                                                                                                                                                                                    | Amin Soebandrio; Edison Johar; Frilasita A Yudhaputri; Hidayat Trimarsanto; Iskandar Adnan; Khin Saw Myint; Lidwina Piliiani; Lydia V. Panggalo; Muhammad Rezki Rasyak; Safarina G Malik; Sukma Oktavianthi; Willy Agustine                                                                                                                                                                                                                               |
| EPI_ISL_2614735, EPI_ISL_2614737, EPI_ISL_2614738, EPI_ISL_2709374, EPI_ISL_2709376, EPI_ISL_2709391, EPI_ISL_2811836                                                                                                                                                                                                                                                                                                                                                                                                                                                                                                                                                                                                                                                                                                                                                                                                                                                                                                                                                                                                                                                                                                                                                                                                                                                                                                                                                                                                                                                                                                                                                                                                                                                                                                                                                                                                                                                                                                                                                                                                                                                                                                                                                                                                                                                                                                                                                                                                                                                                                                                                                 | see above                                      | Eijkman Institute for Molecular Biology, National Research and Innovation Agency                                                                                                                                                                                                                                                                                                                                                                                                    | Amin Soebandrio; Edison Johar; Frilasita A Yudhaputri; Hidayat Trimarsanto; Iskandar Adnan; Khin Saw Myint; Lidwina Piliiani; Lydia V. Panggalo; Muhammad Rezki Rasyak; Safarina G Malik; Sukma Oktavianthi; Willy Agustine                                                                                                                                                                                                                               |
| EPI_ISL_2896198                                                                                                                                                                                                                                                                                                                                                                                                                                                                                                                                                                                                                                                                                                                                                                                                                                                                                                                                                                                                                                                                                                                                                                                                                                                                                                                                                                                                                                                                                                                                                                                                                                                                                                                                                                                                                                                                                                                                                                                                                                                                                                                                                                                                                                                                                                                                                                                                                                                                                                                                                                                                                                                       | RS Pusat Otak Nasional Prof dr. Mahar Mardjono | National Institute of Health Research and Development                                                                                                                                                                                                                                                                                                                                                                                                                               | Arie Ardiansyah Nugraha; Hana Aparsi Pawestri; Hartanti Dian Ikawati; Kartika Dewi Puspa; Krisna Pangesti; Nelly Puspandari; Subangkit; Triyani Soekarso; Vivi Setiawaty                                                                                                                                                                                                                                                                                  |
| EPI_ISL_2709362, EPI_ISL_2709363, EPI_ISL_2709365, EPI_ISL_2709371, EPI_ISL_2709372, EPI_ISL_2709379, EPI_ISL_2709380                                                                                                                                                                                                                                                                                                                                                                                                                                                                                                                                                                                                                                                                                                                                                                                                                                                                                                                                                                                                                                                                                                                                                                                                                                                                                                                                                                                                                                                                                                                                                                                                                                                                                                                                                                                                                                                                                                                                                                                                                                                                                                                                                                                                                                                                                                                                                                                                                                                                                                                                                 | see above                                      | Eijkman Institute for Molecular Biology, National Research and Innovation Agency                                                                                                                                                                                                                                                                                                                                                                                                    | Amin Soebandrio; Edison Johar; Frilasita A Yudhaputri; Hidayat Trimarsanto; Iskandar Adnan; Khin Saw Myint; Lidwina Piliiani; Lydia V. Panggalo; Muhammad Rezki Rasyak; Safarina G Malik; Sukma Oktavianthi; Willy Agustine                                                                                                                                                                                                                               |
| EPI_ISL_2709392                                                                                                                                                                                                                                                                                                                                                                                                                                                                                                                                                                                                                                                                                                                                                                                                                                                                                                                                                                                                                                                                                                                                                                                                                                                                                                                                                                                                                                                                                                                                                                                                                                                                                                                                                                                                                                                                                                                                                                                                                                                                                                                                                                                                                                                                                                                                                                                                                                                                                                                                                                                                                                                       | RS Sentra Medika Cibinong                      | Eijkman Institute for Molecular Biology, National Research and Innovation Agency                                                                                                                                                                                                                                                                                                                                                                                                    | Amin Soebandrio; Edison Johar; Frilasita A Yudhaputri; Hidayat Trimarsanto; Iskandar Adnan; Khin Saw Myint; Lidwina Piliiani; Lydia V. Panggalo; Muhammad Rezki Rasyak; Safarina G Malik; Sukma Oktavianthi; Willy Agustine                                                                                                                                                                                                                               |
| EPI_ISL_2614732                                                                                                                                                                                                                                                                                                                                                                                                                                                                                                                                                                                                                                                                                                                                                                                                                                                                                                                                                                                                                                                                                                                                                                                                                                                                                                                                                                                                                                                                                                                                                                                                                                                                                                                                                                                                                                                                                                                                                                                                                                                                                                                                                                                                                                                                                                                                                                                                                                                                                                                                                                                                                                                       | RS Sumber Waras                                | Eijkman Institute for Molecular Biology, National Research and Innovation Agency                                                                                                                                                                                                                                                                                                                                                                                                    | Amin Soebandrio; Edison Johar; Frilasita A Yudhaputri; Hidayat Trimarsanto; Iskandar Adnan; Khin Saw Myint; Lidwina Piliiani; Lydia V. Panggalo; Muhammad Rezki Rasyak; Safarina G Malik; Sukma Oktavianthi; Willy Agustine                                                                                                                                                                                                                               |
| EPI_ISL_2262263                                                                                                                                                                                                                                                                                                                                                                                                                                                                                                                                                                                                                                                                                                                                                                                                                                                                                                                                                                                                                                                                                                                                                                                                                                                                                                                                                                                                                                                                                                                                                                                                                                                                                                                                                                                                                                                                                                                                                                                                                                                                                                                                                                                                                                                                                                                                                                                                                                                                                                                                                                                                                                                       | RS Umum Kartika Pulomas                        | National Institute of Health Research and Development                                                                                                                                                                                                                                                                                                                                                                                                                               | Arie Ardiansyah Nugraha; Hana Aparsi Pawestri; Hartanti Dian Ikawati; Kartika Dewi Puspa; Krisna Pangesti; Nelly Puspandari; Subangkit; Triyani Soekarso; Vivi Setiawaty                                                                                                                                                                                                                                                                                  |
| EPI_ISL_2617513,<br>EPI_ISL_2617516,<br>EPI_ISL_2617517                                                                                                                                                                                                                                                                                                                                                                                                                                                                                                                                                                                                                                                                                                                                                                                                                                                                                                                                                                                                                                                                                                                                                                                                                                                                                                                                                                                                                                                                                                                                                                                                                                                                                                                                                                                                                                                                                                                                                                                                                                                                                                                                                                                                                                                                                                                                                                                                                                                                                                                                                                                                               | RS Umum Medistra                               | National Institute of Health Research and Development                                                                                                                                                                                                                                                                                                                                                                                                                               | Arie Ardiansyah Nugraha; Hana Aparsi Pawestri; Hartanti Dian Ikawati; Kartika Dewi Puspa; Krisna Pangesti; Nelly Puspandari; Subangkit; Triyani Soekarso; Vivi Setiawaty                                                                                                                                                                                                                                                                                  |
| EPI_ISL_2709388                                                                                                                                                                                                                                                                                                                                                                                                                                                                                                                                                                                                                                                                                                                                                                                                                                                                                                                                                                                                                                                                                                                                                                                                                                                                                                                                                                                                                                                                                                                                                                                                                                                                                                                                                                                                                                                                                                                                                                                                                                                                                                                                                                                                                                                                                                                                                                                                                                                                                                                                                                                                                                                       | RSCM                                           | Eijkman Institute for Molecular Biology, National Research and Innovation Agency                                                                                                                                                                                                                                                                                                                                                                                                    | Amin Soebandrio; Edison Johar; Frilasita A Yudhaputri; Hidayat Trimarsanto; Iskandar Adnan; Khin Saw Myint; Lidwina Piliiani; Lydia V. Panggalo; Muhammad Rezki Rasyak; Safarina G Malik; Sukma Oktavianthi; Willy Agustine                                                                                                                                                                                                                               |
| EPI_ISL_2631455                                                                                                                                                                                                                                                                                                                                                                                                                                                                                                                                                                                                                                                                                                                                                                                                                                                                                                                                                                                                                                                                                                                                                                                                                                                                                                                                                                                                                                                                                                                                                                                                                                                                                                                                                                                                                                                                                                                                                                                                                                                                                                                                                                                                                                                                                                                                                                                                                                                                                                                                                                                                                                                       | RSK Paru Karawang                              | Indonesian Institute of Sciences (LIPI)/National Agency of Research and Innovation (BRIN) and National Institute of Health Research and Development (NIHRD)                                                                                                                                                                                                                                                                                                                         | Anggia Prasetyoputri; Eko Wahyu Putro; Herjuno A. Nugroho; Idris; Indriawati; Isa Nuryana; Listiana Oktavia; Puspita Lisdianti; Sri Swasthikawati; Subangkit; Syam B. Iryanto; Vivi Setiawaty; Yayuk Sri Rahayu; Yuliawati                                                                                                                                                                                                                                |
| EPI_ISL_2262283,<br>EPI_ISL_2262285,<br>EPI_ISL_2262286,<br>EPI_ISL_2262289,<br>EPI_ISL_2262291                                                                                                                                                                                                                                                                                                                                                                                                                                                                                                                                                                                                                                                                                                                                                                                                                                                                                                                                                                                                                                                                                                                                                                                                                                                                                                                                                                                                                                                                                                                                                                                                                                                                                                                                                                                                                                                                                                                                                                                                                                                                                                                                                                                                                                                                                                                                                                                                                                                                                                                                                                       | RSPI Prof. Dr. Sulianti Saroso                 | National Institute of Health Research and Development                                                                                                                                                                                                                                                                                                                                                                                                                               | Arie Ardiansyah Nugraha; Hana Aparsi Pawestri; Hartanti Dian Ikawati; Kartika Dewi Puspa; Krisna Pangesti; Nelly Puspandari; Subangkit; Triyani Soekarso; Vivi Setiawaty                                                                                                                                                                                                                                                                                  |
| EPI_ISL_2868879,<br>EPI_ISL_2868886                                                                                                                                                                                                                                                                                                                                                                                                                                                                                                                                                                                                                                                                                                                                                                                                                                                                                                                                                                                                                                                                                                                                                                                                                                                                                                                                                                                                                                                                                                                                                                                                                                                                                                                                                                                                                                                                                                                                                                                                                                                                                                                                                                                                                                                                                                                                                                                                                                                                                                                                                                                                                                   | RSPI Sulianti Saroso                           | National Institute of Health Research and Development                                                                                                                                                                                                                                                                                                                                                                                                                               | Arie Ardiansyah Nugraha; Hana Aparsi Pawestri; Hartanti Dian Ikawati; Kartika Dewi Puspa; Krisna Pangesti; Nelly Puspandari; Subangkit; Triyani Soekarso; Vivi Setiawaty                                                                                                                                                                                                                                                                                  |
| EPI_ISL_2709393,<br>EPI_ISL_2709398,<br>EPI_ISL_2709399                                                                                                                                                                                                                                                                                                                                                                                                                                                                                                                                                                                                                                                                                                                                                                                                                                                                                                                                                                                                                                                                                                                                                                                                                                                                                                                                                                                                                                                                                                                                                                                                                                                                                                                                                                                                                                                                                                                                                                                                                                                                                                                                                                                                                                                                                                                                                                                                                                                                                                                                                                                                               | RSU Adhyaksa                                   | Eijkman Institute for Molecular Biology, National Research and Innovation Agency                                                                                                                                                                                                                                                                                                                                                                                                    | Amin Soebandrio; Edison Johar; Frilasita A Yudhaputri; Hidayat Trimarsanto; Iskandar Adnan; Khin Saw Myint; Lidwina Piliiani; Lydia V. Panggalo; Muhammad Rezki Rasyak; Safarina G Malik; Sukma Oktavianthi; Willy Agustine                                                                                                                                                                                                                               |
| EPI_ISL_2709396,<br>EPI_ISL_2709397                                                                                                                                                                                                                                                                                                                                                                                                                                                                                                                                                                                                                                                                                                                                                                                                                                                                                                                                                                                                                                                                                                                                                                                                                                                                                                                                                                                                                                                                                                                                                                                                                                                                                                                                                                                                                                                                                                                                                                                                                                                                                                                                                                                                                                                                                                                                                                                                                                                                                                                                                                                                                                   | RSU HGA Depok                                  | Eijkman Institute for Molecular Biology, National Research and Innovation Agency                                                                                                                                                                                                                                                                                                                                                                                                    | Amin Soebandrio; Edison Johar; Frilasita A Yudhaputri; Hidayat Trimarsanto; Iskandar Adnan; Khin Saw Myint; Lidwina Piliiani; Lydia V. Panggalo; Muhammad Rezki Rasyak; Safarina G Malik; Sukma Oktavianthi; Willy Agustine                                                                                                                                                                                                                               |
| EPI_ISL_2854741,<br>EPI_ISL_2854742,<br>EPI_ISL_2854743,<br>EPI_ISL_2854744                                                                                                                                                                                                                                                                                                                                                                                                                                                                                                                                                                                                                                                                                                                                                                                                                                                                                                                                                                                                                                                                                                                                                                                                                                                                                                                                                                                                                                                                                                                                                                                                                                                                                                                                                                                                                                                                                                                                                                                                                                                                                                                                                                                                                                                                                                                                                                                                                                                                                                                                                                                           | RSU Kartika Pulomas                            | National Institute of Health Research and Development                                                                                                                                                                                                                                                                                                                                                                                                                               | ; Arie Ardiansyah Nugraha; Hana Aparsi Pawestri; Hartanti Dian Ikawati; Kartika Dewi Puspa; Krisna Pangesti; Nelly Puspandari; Subangkit; Triyani Soekarso; Vivi Setiawaty                                                                                                                                                                                                                                                                                |
| EPI_ISL_2854777                                                                                                                                                                                                                                                                                                                                                                                                                                                                                                                                                                                                                                                                                                                                                                                                                                                                                                                                                                                                                                                                                                                                                                                                                                                                                                                                                                                                                                                                                                                                                                                                                                                                                                                                                                                                                                                                                                                                                                                                                                                                                                                                                                                                                                                                                                                                                                                                                                                                                                                                                                                                                                                       | RSU Permata Depok                              | National Institute of Health Research and Development                                                                                                                                                                                                                                                                                                                                                                                                                               | Arie Ardiansyah Nugraha; Hana Aparsi Pawestri; Hartanti Dian Ikawati; Kartika Dewi Puspa; Krisna Pangesti; Nelly Puspandari; Subangkit; Triyani Soekarso; Vivi Setiawaty                                                                                                                                                                                                                                                                                  |
| EPI_ISL_2233089                                                                                                                                                                                                                                                                                                                                                                                                                                                                                                                                                                                                                                                                                                                                                                                                                                                                                                                                                                                                                                                                                                                                                                                                                                                                                                                                                                                                                                                                                                                                                                                                                                                                                                                                                                                                                                                                                                                                                                                                                                                                                                                                                                                                                                                                                                                                                                                                                                                                                                                                                                                                                                                       | RSUD Abdul Moeis                               | National Institute of Health Research and Development                                                                                                                                                                                                                                                                                                                                                                                                                               | Arie Ardiansyah Nugraha; Hana Aparsi Pawestri; Hartanti Dian Ikawati; Kartika Dewi Puspa; Krisna Pangesti; Nelly Puspandari; Subangkit; Triyani Soekarso; Vivi Setiawaty                                                                                                                                                                                                                                                                                  |
| EPI_ISL_2854747                                                                                                                                                                                                                                                                                                                                                                                                                                                                                                                                                                                                                                                                                                                                                                                                                                                                                                                                                                                                                                                                                                                                                                                                                                                                                                                                                                                                                                                                                                                                                                                                                                                                                                                                                                                                                                                                                                                                                                                                                                                                                                                                                                                                                                                                                                                                                                                                                                                                                                                                                                                                                                                       | RSUD Ciawi                                     | National Institute of Health Research and Development                                                                                                                                                                                                                                                                                                                                                                                                                               | ; Arie Ardiansyah Nugraha; Hana Aparsi Pawestri; Hartanti Dian Ikawati; Kartika Dewi Puspa; Krisna Pangesti; Nelly Puspandari; Subangkit; Triyani Soekarso; Vivi Setiawaty                                                                                                                                                                                                                                                                                |
| EPI_ISL_2709400                                                                                                                                                                                                                                                                                                                                                                                                                                                                                                                                                                                                                                                                                                                                                                                                                                                                                                                                                                                                                                                                                                                                                                                                                                                                                                                                                                                                                                                                                                                                                                                                                                                                                                                                                                                                                                                                                                                                                                                                                                                                                                                                                                                                                                                                                                                                                                                                                                                                                                                                                                                                                                                       | RSUD Cileungsi                                 | Eijkman Institute for Molecular Biology, National Research and Innovation Agency                                                                                                                                                                                                                                                                                                                                                                                                    | Amin Soebandrio; Edison Johar; Frilasita A Yudhaputri; Hidayat Trimarsanto; Iskandar Adnan; Khin Saw Myint; Lidwina Piliiani; Lydia V. Panggalo; Muhammad Rezki Rasyak; Safarina G Malik; Sukma Oktavianthi; Willy Agustine                                                                                                                                                                                                                               |
| EPI_ISL_2502615                                                                                                                                                                                                                                                                                                                                                                                                                                                                                                                                                                                                                                                                                                                                                                                                                                                                                                                                                                                                                                                                                                                                                                                                                                                                                                                                                                                                                                                                                                                                                                                                                                                                                                                                                                                                                                                                                                                                                                                                                                                                                                                                                                                                                                                                                                                                                                                                                                                                                                                                                                                                                                                       | RSUD dr Loekmono Hadi                          | Genetics Working Group (Pokja Genetik) Faculty of Medicine, Public Health and Nursing Universitas Gadjah Mada (FK-KMK UGM); Disease Investigation Center Wates Ministry of Agriculture Indonesia; Department of Microbiology FK-KMK UGM; Laboratorium Diagnostik Yayasan Tahlia World Mosquito Program (WMP) Yogyakarta Center for Tropical Medicine FK-KMK UGM; Integrated Research Center FK-KMK UGM; Department of Computer Science and Electronics FMIPA UGM; RSUP Dr. Sardjito | Afiahayati; Dwi AA Nugrahaningsih; Dwi Indaryati; Dyah A Puspitarani; Edwin W. Daniwijaya; Eggi Arguni; Endah Supriyati; Gunadi; Hendra Wibawa; Indarto Sulistiyono; Kristy Iskandar; Ludhang P. Rizki; Marcellus; Mohamad S. Hakim; Nungki Anggorowati; Pramesti G Dewi; Siswanto; Susan Simanjaya; Titik Nuryastuti; Tri Wibawa                                                                                                                         |
| EPI_ISL_2502687, EPI_ISL_2502764, EPI_ISL_2506041, EPI_ISL_2534079, EPI_ISL_2534379, EPI_ISL_2534457, EPI_ISL_2534489, EPI_ISL_2534490, EPI_ISL_2534518                                                                                                                                                                                                                                                                                                                                                                                                                                                                                                                                                                                                                                                                                                                                                                                                                                                                                                                                                                                                                                                                                                                                                                                                                                                                                                                                                                                                                                                                                                                                                                                                                                                                                                                                                                                                                                                                                                                                                                                                                                                                                                                                                                                                                                                                                                                                                                                                                                                                                                               | see above                                      | Genetics Working Group (Pokja Genetik) Faculty of Medicine, Public Health and Nursing Universitas Gadjah Mada (FK-KMK UGM); Disease                                                                                                                                                                                                                                                                                                                                                 | Afiahayati; Alvina A Setiawan; Cita S Amalia; Dwi AA Nugrahaningsih; Dwi Indaryati; Dyah A Puspitarani; Edwin W. Daniwijaya; Eggi Arguni; Endah Supriyati; Gunadi; Hana F Hanifin; Hendra Wibawa; Indarto Sulistiyono; Irene Tania; Khanza a Vujira; Kristy Iskandar; Ludhang P. Rizki; Marcellus; Mohamad S. Hakim; Nungki Anggorowati; Pramesti G Dewi; Siswanto; Susan Simanjaya; Titik Nuryastuti; Tri Wibawa                                         |

|                                                                                                                                                                                                                                                                                                                                                                                                                                                                                                                                                                                                                                                                                                                                                                                                                                                                                                                                                                                                                                                                                                                                                                                                                                                                                                                                                                                                                                                                                                                                                                                                                                                                                                                                                                                                                                                                                                                                                                                                                                                                                                                                                                                                                                                                                                                                                                                                                                                                                                                                                                                                                                                                                                                                                                                                                                                                                                                                                                                                                                                                                                                                                                                                                                                                                                                                                                                                                                                                                                                                                                                                                                                                                                                                                                                                                                                                                                                                                                                                                                                                                                                                                                                                                                                                                                                                                                                                                                                                                                                                                                                                                                                                                                                                                                                                                                                                                                                                                                                                                                                                                                                                                                                                                                                                                                                                                                                                                                                                                                                                                                                                                                                                                                                                                                                                                                                                                                                                                                                                                                                                                                                                                                                                                                                                                                                                                                                                                                                                                                                                                                                                                                                                                                                                                                                                                                                                                                                                                                                                                                                                                                                                                                                                                                                                                                                                                                                                                                                                                                                                                                                                                                                                                                                                                                                                                                                                                                                                                                                                                                                                                                                                                                                                                                                                                                                                                                                                                                                                                                                                                                                                                                                                                                                                                                                                                                                                                                                                                                                                                                                                                                                                                                                                                                                                                                                                                                                                                                                                                                                                                                                                                                                                                                                                                                                                                                                                                                                                                                                                                                                                                                                                                                                                                                                                                                                                                                                                                                                                                                                                                                                                                                                                                                                                                                                                                                                                                                                                                                                                                                                                                                                                                                                                                                                                                                                                                                                                                                                                                                                                                                                                                                                                                                                                                                                                                                                                                                                                                                                                                                                                                                                                                                                                                                                                                                                                                                                                                                                                                                                                                                                                                                                                                                                                                                                                                                                                                                                                                                                                                                                                                                                                                                                                                                                                                                                                                                                                                                                |                                                                                |                                                                                                                                                                                                                                                                                                                                                                |                                                                                                                                                                                                                                                                                                                                                                                                               |
|------------------------------------------------------------------------------------------------------------------------------------------------------------------------------------------------------------------------------------------------------------------------------------------------------------------------------------------------------------------------------------------------------------------------------------------------------------------------------------------------------------------------------------------------------------------------------------------------------------------------------------------------------------------------------------------------------------------------------------------------------------------------------------------------------------------------------------------------------------------------------------------------------------------------------------------------------------------------------------------------------------------------------------------------------------------------------------------------------------------------------------------------------------------------------------------------------------------------------------------------------------------------------------------------------------------------------------------------------------------------------------------------------------------------------------------------------------------------------------------------------------------------------------------------------------------------------------------------------------------------------------------------------------------------------------------------------------------------------------------------------------------------------------------------------------------------------------------------------------------------------------------------------------------------------------------------------------------------------------------------------------------------------------------------------------------------------------------------------------------------------------------------------------------------------------------------------------------------------------------------------------------------------------------------------------------------------------------------------------------------------------------------------------------------------------------------------------------------------------------------------------------------------------------------------------------------------------------------------------------------------------------------------------------------------------------------------------------------------------------------------------------------------------------------------------------------------------------------------------------------------------------------------------------------------------------------------------------------------------------------------------------------------------------------------------------------------------------------------------------------------------------------------------------------------------------------------------------------------------------------------------------------------------------------------------------------------------------------------------------------------------------------------------------------------------------------------------------------------------------------------------------------------------------------------------------------------------------------------------------------------------------------------------------------------------------------------------------------------------------------------------------------------------------------------------------------------------------------------------------------------------------------------------------------------------------------------------------------------------------------------------------------------------------------------------------------------------------------------------------------------------------------------------------------------------------------------------------------------------------------------------------------------------------------------------------------------------------------------------------------------------------------------------------------------------------------------------------------------------------------------------------------------------------------------------------------------------------------------------------------------------------------------------------------------------------------------------------------------------------------------------------------------------------------------------------------------------------------------------------------------------------------------------------------------------------------------------------------------------------------------------------------------------------------------------------------------------------------------------------------------------------------------------------------------------------------------------------------------------------------------------------------------------------------------------------------------------------------------------------------------------------------------------------------------------------------------------------------------------------------------------------------------------------------------------------------------------------------------------------------------------------------------------------------------------------------------------------------------------------------------------------------------------------------------------------------------------------------------------------------------------------------------------------------------------------------------------------------------------------------------------------------------------------------------------------------------------------------------------------------------------------------------------------------------------------------------------------------------------------------------------------------------------------------------------------------------------------------------------------------------------------------------------------------------------------------------------------------------------------------------------------------------------------------------------------------------------------------------------------------------------------------------------------------------------------------------------------------------------------------------------------------------------------------------------------------------------------------------------------------------------------------------------------------------------------------------------------------------------------------------------------------------------------------------------------------------------------------------------------------------------------------------------------------------------------------------------------------------------------------------------------------------------------------------------------------------------------------------------------------------------------------------------------------------------------------------------------------------------------------------------------------------------------------------------------------------------------------------------------------------------------------------------------------------------------------------------------------------------------------------------------------------------------------------------------------------------------------------------------------------------------------------------------------------------------------------------------------------------------------------------------------------------------------------------------------------------------------------------------------------------------------------------------------------------------------------------------------------------------------------------------------------------------------------------------------------------------------------------------------------------------------------------------------------------------------------------------------------------------------------------------------------------------------------------------------------------------------------------------------------------------------------------------------------------------------------------------------------------------------------------------------------------------------------------------------------------------------------------------------------------------------------------------------------------------------------------------------------------------------------------------------------------------------------------------------------------------------------------------------------------------------------------------------------------------------------------------------------------------------------------------------------------------------------------------------------------------------------------------------------------------------------------------------------------------------------------------------------------------------------------------------------------------------------------------------------------------------------------------------------------------------------------------------------------------------------------------------------------------------------------------------------------------------------------------------------------------------------------------------------------------------------------------------------------------------------------------------------------------------------------------------------------------------------------------------------------------------------------------------------------------------------------------------------------------------------------------------------------------------------------------------------------------------------------------------------------------------------------------------------------------------------------------------------------------------------------------------------------------------------------------------------------------------------------------------------------------------------------------------------------------------------------------------------------------------------------------------------------------------------------------------------------------------------------------------------------------------------------------------------------------------------------------------------------------------------------------------------------------------------------------------------------------------------------------------------------------------------------------------------------------------------------------------------------------------------------------------------------------------------------------------------------------------------------------------------------------------------------------------------------------------------------------------------------------------------------------------------------------------------------------------------------------------------------------------------------------------------------------------------------------------------------------------------------------------------------------------------------------------------------------------------------------------------------------------------------------------------------------------------------------------------------------------------------------------------------------------------------------------------------------------------------------------------------------------------------------------------------------------------------------------------------------------------------------------------------------------------------------------------------------------------------------------------------------------------------------------------------------------------------------------------------------------------------------------------------------------------------------------------------------------------------------------------------------------------------------------------------------------------------------------------------------------------------------------------------------------------------------------------------------------------------------------------------------------------------------------------------------------------------------------------------------------------------------------------------------------------------------------------------------------------------------------------------------------------------------------------------------------------------------------------------------------------------------------------------------------------------------------------------------------------------------------------------------------------------------------------------------------------------------------------------------------------------------------|--------------------------------------------------------------------------------|----------------------------------------------------------------------------------------------------------------------------------------------------------------------------------------------------------------------------------------------------------------------------------------------------------------------------------------------------------------|---------------------------------------------------------------------------------------------------------------------------------------------------------------------------------------------------------------------------------------------------------------------------------------------------------------------------------------------------------------------------------------------------------------|
|                                                                                                                                                                                                                                                                                                                                                                                                                                                                                                                                                                                                                                                                                                                                                                                                                                                                                                                                                                                                                                                                                                                                                                                                                                                                                                                                                                                                                                                                                                                                                                                                                                                                                                                                                                                                                                                                                                                                                                                                                                                                                                                                                                                                                                                                                                                                                                                                                                                                                                                                                                                                                                                                                                                                                                                                                                                                                                                                                                                                                                                                                                                                                                                                                                                                                                                                                                                                                                                                                                                                                                                                                                                                                                                                                                                                                                                                                                                                                                                                                                                                                                                                                                                                                                                                                                                                                                                                                                                                                                                                                                                                                                                                                                                                                                                                                                                                                                                                                                                                                                                                                                                                                                                                                                                                                                                                                                                                                                                                                                                                                                                                                                                                                                                                                                                                                                                                                                                                                                                                                                                                                                                                                                                                                                                                                                                                                                                                                                                                                                                                                                                                                                                                                                                                                                                                                                                                                                                                                                                                                                                                                                                                                                                                                                                                                                                                                                                                                                                                                                                                                                                                                                                                                                                                                                                                                                                                                                                                                                                                                                                                                                                                                                                                                                                                                                                                                                                                                                                                                                                                                                                                                                                                                                                                                                                                                                                                                                                                                                                                                                                                                                                                                                                                                                                                                                                                                                                                                                                                                                                                                                                                                                                                                                                                                                                                                                                                                                                                                                                                                                                                                                                                                                                                                                                                                                                                                                                                                                                                                                                                                                                                                                                                                                                                                                                                                                                                                                                                                                                                                                                                                                                                                                                                                                                                                                                                                                                                                                                                                                                                                                                                                                                                                                                                                                                                                                                                                                                                                                                                                                                                                                                                                                                                                                                                                                                                                                                                                                                                                                                                                                                                                                                                                                                                                                                                                                                                                                                                                                                                                                                                                                                                                                                                                                                                                                                                                                                                                                                |                                                                                | Investigation Center Wates Ministry of Agriculture Indonesia;<br>Department of Microbiology FK-KMK UGM; Laboratorium Diagnostik<br>Yayasan Tahiya World Mosquito Program (WMP) Yogyakarta Center for<br>Tropical Medicine FK-KMK UGM; Integrated Research Center FK-KMK<br>UGM; Department of Computer Science and Electronics FMIPA UGM;<br>RSUP Dr. Sardjito |                                                                                                                                                                                                                                                                                                                                                                                                               |
| EPI_ISL_2617504                                                                                                                                                                                                                                                                                                                                                                                                                                                                                                                                                                                                                                                                                                                                                                                                                                                                                                                                                                                                                                                                                                                                                                                                                                                                                                                                                                                                                                                                                                                                                                                                                                                                                                                                                                                                                                                                                                                                                                                                                                                                                                                                                                                                                                                                                                                                                                                                                                                                                                                                                                                                                                                                                                                                                                                                                                                                                                                                                                                                                                                                                                                                                                                                                                                                                                                                                                                                                                                                                                                                                                                                                                                                                                                                                                                                                                                                                                                                                                                                                                                                                                                                                                                                                                                                                                                                                                                                                                                                                                                                                                                                                                                                                                                                                                                                                                                                                                                                                                                                                                                                                                                                                                                                                                                                                                                                                                                                                                                                                                                                                                                                                                                                                                                                                                                                                                                                                                                                                                                                                                                                                                                                                                                                                                                                                                                                                                                                                                                                                                                                                                                                                                                                                                                                                                                                                                                                                                                                                                                                                                                                                                                                                                                                                                                                                                                                                                                                                                                                                                                                                                                                                                                                                                                                                                                                                                                                                                                                                                                                                                                                                                                                                                                                                                                                                                                                                                                                                                                                                                                                                                                                                                                                                                                                                                                                                                                                                                                                                                                                                                                                                                                                                                                                                                                                                                                                                                                                                                                                                                                                                                                                                                                                                                                                                                                                                                                                                                                                                                                                                                                                                                                                                                                                                                                                                                                                                                                                                                                                                                                                                                                                                                                                                                                                                                                                                                                                                                                                                                                                                                                                                                                                                                                                                                                                                                                                                                                                                                                                                                                                                                                                                                                                                                                                                                                                                                                                                                                                                                                                                                                                                                                                                                                                                                                                                                                                                                                                                                                                                                                                                                                                                                                                                                                                                                                                                                                                                                                                                                                                                                                                                                                                                                                                                                                                                                                                                                                                                                | RSUPP Persahabatan Jakarta                                                     | National Institute of Health Research and Development                                                                                                                                                                                                                                                                                                          | Arie Ardiansyah Nugraha; Hana Apsari Pawestri; Hartanti Dian Ikawati; Kartika Dewi Puspa; Krisna Pangesti; Nelly Puspandari; Subangkit; Triyani Soekarso; Vivi Setiawaty                                                                                                                                                                                                                                      |
| EPI_ISL_2678103, EPI_ISL_2678104, EPI_ISL_2678105, EPI_ISL_2802834, EPI_ISL_2802835, EPI_ISL_2802841, EPI_ISL_2802846, EPI_ISL_2802853, EPI_ISL_2802854, EPI_ISL_2802855                                                                                                                                                                                                                                                                                                                                                                                                                                                                                                                                                                                                                                                                                                                                                                                                                                                                                                                                                                                                                                                                                                                                                                                                                                                                                                                                                                                                                                                                                                                                                                                                                                                                                                                                                                                                                                                                                                                                                                                                                                                                                                                                                                                                                                                                                                                                                                                                                                                                                                                                                                                                                                                                                                                                                                                                                                                                                                                                                                                                                                                                                                                                                                                                                                                                                                                                                                                                                                                                                                                                                                                                                                                                                                                                                                                                                                                                                                                                                                                                                                                                                                                                                                                                                                                                                                                                                                                                                                                                                                                                                                                                                                                                                                                                                                                                                                                                                                                                                                                                                                                                                                                                                                                                                                                                                                                                                                                                                                                                                                                                                                                                                                                                                                                                                                                                                                                                                                                                                                                                                                                                                                                                                                                                                                                                                                                                                                                                                                                                                                                                                                                                                                                                                                                                                                                                                                                                                                                                                                                                                                                                                                                                                                                                                                                                                                                                                                                                                                                                                                                                                                                                                                                                                                                                                                                                                                                                                                                                                                                                                                                                                                                                                                                                                                                                                                                                                                                                                                                                                                                                                                                                                                                                                                                                                                                                                                                                                                                                                                                                                                                                                                                                                                                                                                                                                                                                                                                                                                                                                                                                                                                                                                                                                                                                                                                                                                                                                                                                                                                                                                                                                                                                                                                                                                                                                                                                                                                                                                                                                                                                                                                                                                                                                                                                                                                                                                                                                                                                                                                                                                                                                                                                                                                                                                                                                                                                                                                                                                                                                                                                                                                                                                                                                                                                                                                                                                                                                                                                                                                                                                                                                                                                                                                                                                                                                                                                                                                                                                                                                                                                                                                                                                                                                                                                                                                                                                                                                                                                                                                                                                                                                                                                                                                                                                                                       |                                                                                |                                                                                                                                                                                                                                                                                                                                                                |                                                                                                                                                                                                                                                                                                                                                                                                               |
| see above                                                                                                                                                                                                                                                                                                                                                                                                                                                                                                                                                                                                                                                                                                                                                                                                                                                                                                                                                                                                                                                                                                                                                                                                                                                                                                                                                                                                                                                                                                                                                                                                                                                                                                                                                                                                                                                                                                                                                                                                                                                                                                                                                                                                                                                                                                                                                                                                                                                                                                                                                                                                                                                                                                                                                                                                                                                                                                                                                                                                                                                                                                                                                                                                                                                                                                                                                                                                                                                                                                                                                                                                                                                                                                                                                                                                                                                                                                                                                                                                                                                                                                                                                                                                                                                                                                                                                                                                                                                                                                                                                                                                                                                                                                                                                                                                                                                                                                                                                                                                                                                                                                                                                                                                                                                                                                                                                                                                                                                                                                                                                                                                                                                                                                                                                                                                                                                                                                                                                                                                                                                                                                                                                                                                                                                                                                                                                                                                                                                                                                                                                                                                                                                                                                                                                                                                                                                                                                                                                                                                                                                                                                                                                                                                                                                                                                                                                                                                                                                                                                                                                                                                                                                                                                                                                                                                                                                                                                                                                                                                                                                                                                                                                                                                                                                                                                                                                                                                                                                                                                                                                                                                                                                                                                                                                                                                                                                                                                                                                                                                                                                                                                                                                                                                                                                                                                                                                                                                                                                                                                                                                                                                                                                                                                                                                                                                                                                                                                                                                                                                                                                                                                                                                                                                                                                                                                                                                                                                                                                                                                                                                                                                                                                                                                                                                                                                                                                                                                                                                                                                                                                                                                                                                                                                                                                                                                                                                                                                                                                                                                                                                                                                                                                                                                                                                                                                                                                                                                                                                                                                                                                                                                                                                                                                                                                                                                                                                                                                                                                                                                                                                                                                                                                                                                                                                                                                                                                                                                                                                                                                                                                                                                                                                                                                                                                                                                                                                                                                                                      | Ramathibodi Hospital                                                           | COVID-19 Network Investigations (CONI) Alliance                                                                                                                                                                                                                                                                                                                | Angkana Huang; Anthony R. Jones; Arporn Wangwiwatsin; Bhakbhoon Panthan; Chonticha Klungtong; Duangkamon Loesbanluechai; Ekawat Pasomsub; Elizabeth Batty; Insee Sensorn; Janjira Thaipadungpanit; Khajohn Joonlasak; Kingkan Rakmanee; Krittikorn Kumpornsin; Namfon Kotanan; Stefan Fernandez; Thanat Chookajorn; Theerarat Kochakarn; Treewat Watthanachockchai; Wasun Chantraita; Wudtichai Manasatienkij |
| EPI_ISL_1564356, EPI_ISL_1652717, EPI_ISL_1857699                                                                                                                                                                                                                                                                                                                                                                                                                                                                                                                                                                                                                                                                                                                                                                                                                                                                                                                                                                                                                                                                                                                                                                                                                                                                                                                                                                                                                                                                                                                                                                                                                                                                                                                                                                                                                                                                                                                                                                                                                                                                                                                                                                                                                                                                                                                                                                                                                                                                                                                                                                                                                                                                                                                                                                                                                                                                                                                                                                                                                                                                                                                                                                                                                                                                                                                                                                                                                                                                                                                                                                                                                                                                                                                                                                                                                                                                                                                                                                                                                                                                                                                                                                                                                                                                                                                                                                                                                                                                                                                                                                                                                                                                                                                                                                                                                                                                                                                                                                                                                                                                                                                                                                                                                                                                                                                                                                                                                                                                                                                                                                                                                                                                                                                                                                                                                                                                                                                                                                                                                                                                                                                                                                                                                                                                                                                                                                                                                                                                                                                                                                                                                                                                                                                                                                                                                                                                                                                                                                                                                                                                                                                                                                                                                                                                                                                                                                                                                                                                                                                                                                                                                                                                                                                                                                                                                                                                                                                                                                                                                                                                                                                                                                                                                                                                                                                                                                                                                                                                                                                                                                                                                                                                                                                                                                                                                                                                                                                                                                                                                                                                                                                                                                                                                                                                                                                                                                                                                                                                                                                                                                                                                                                                                                                                                                                                                                                                                                                                                                                                                                                                                                                                                                                                                                                                                                                                                                                                                                                                                                                                                                                                                                                                                                                                                                                                                                                                                                                                                                                                                                                                                                                                                                                                                                                                                                                                                                                                                                                                                                                                                                                                                                                                                                                                                                                                                                                                                                                                                                                                                                                                                                                                                                                                                                                                                                                                                                                                                                                                                                                                                                                                                                                                                                                                                                                                                                                                                                                                                                                                                                                                                                                                                                                                                                                                                                                                                                                              | Randex Laboratories                                                            | Wellcome Sanger Institute for the COVID-19 Genomics UK (COG-UK) Consortium                                                                                                                                                                                                                                                                                     | Cordelia Langford; David K. Jackson; Dominic Kwiatkowski; Ewan Harrison; Ian Johnston; Jeffrey Barrett; John Sillitoe on behalf of the Wellcome Sanger Institute COVID-19 Surveillance Team; Randex Laboratories and Alex Alderton; Roberto Amato; Sonia Goncalves                                                                                                                                            |
| EPI_ISL_2433618                                                                                                                                                                                                                                                                                                                                                                                                                                                                                                                                                                                                                                                                                                                                                                                                                                                                                                                                                                                                                                                                                                                                                                                                                                                                                                                                                                                                                                                                                                                                                                                                                                                                                                                                                                                                                                                                                                                                                                                                                                                                                                                                                                                                                                                                                                                                                                                                                                                                                                                                                                                                                                                                                                                                                                                                                                                                                                                                                                                                                                                                                                                                                                                                                                                                                                                                                                                                                                                                                                                                                                                                                                                                                                                                                                                                                                                                                                                                                                                                                                                                                                                                                                                                                                                                                                                                                                                                                                                                                                                                                                                                                                                                                                                                                                                                                                                                                                                                                                                                                                                                                                                                                                                                                                                                                                                                                                                                                                                                                                                                                                                                                                                                                                                                                                                                                                                                                                                                                                                                                                                                                                                                                                                                                                                                                                                                                                                                                                                                                                                                                                                                                                                                                                                                                                                                                                                                                                                                                                                                                                                                                                                                                                                                                                                                                                                                                                                                                                                                                                                                                                                                                                                                                                                                                                                                                                                                                                                                                                                                                                                                                                                                                                                                                                                                                                                                                                                                                                                                                                                                                                                                                                                                                                                                                                                                                                                                                                                                                                                                                                                                                                                                                                                                                                                                                                                                                                                                                                                                                                                                                                                                                                                                                                                                                                                                                                                                                                                                                                                                                                                                                                                                                                                                                                                                                                                                                                                                                                                                                                                                                                                                                                                                                                                                                                                                                                                                                                                                                                                                                                                                                                                                                                                                                                                                                                                                                                                                                                                                                                                                                                                                                                                                                                                                                                                                                                                                                                                                                                                                                                                                                                                                                                                                                                                                                                                                                                                                                                                                                                                                                                                                                                                                                                                                                                                                                                                                                                                                                                                                                                                                                                                                                                                                                                                                                                                                                                                                                                | Regional Medical Science Center 2 Phitsanulok                                  | Division of Genomic Medicine and Innovation support, Department of Medical Sciences, Ministry of Public Health, Thailand                                                                                                                                                                                                                                       | Archawin Rojanawiwat; Jirapha Pakdee; Natthakul Bunneang; Nuanjun Wichukhinda; Penpittha Thawong; Pilailuk Akkapaiboon Okada; Pundharika Piboonsiri; Surakameth Mahasirimongkol; Warittha Sawaengdee                                                                                                                                                                                                          |
| EPI_ISL_2877032, EPI_ISL_2877033                                                                                                                                                                                                                                                                                                                                                                                                                                                                                                                                                                                                                                                                                                                                                                                                                                                                                                                                                                                                                                                                                                                                                                                                                                                                                                                                                                                                                                                                                                                                                                                                                                                                                                                                                                                                                                                                                                                                                                                                                                                                                                                                                                                                                                                                                                                                                                                                                                                                                                                                                                                                                                                                                                                                                                                                                                                                                                                                                                                                                                                                                                                                                                                                                                                                                                                                                                                                                                                                                                                                                                                                                                                                                                                                                                                                                                                                                                                                                                                                                                                                                                                                                                                                                                                                                                                                                                                                                                                                                                                                                                                                                                                                                                                                                                                                                                                                                                                                                                                                                                                                                                                                                                                                                                                                                                                                                                                                                                                                                                                                                                                                                                                                                                                                                                                                                                                                                                                                                                                                                                                                                                                                                                                                                                                                                                                                                                                                                                                                                                                                                                                                                                                                                                                                                                                                                                                                                                                                                                                                                                                                                                                                                                                                                                                                                                                                                                                                                                                                                                                                                                                                                                                                                                                                                                                                                                                                                                                                                                                                                                                                                                                                                                                                                                                                                                                                                                                                                                                                                                                                                                                                                                                                                                                                                                                                                                                                                                                                                                                                                                                                                                                                                                                                                                                                                                                                                                                                                                                                                                                                                                                                                                                                                                                                                                                                                                                                                                                                                                                                                                                                                                                                                                                                                                                                                                                                                                                                                                                                                                                                                                                                                                                                                                                                                                                                                                                                                                                                                                                                                                                                                                                                                                                                                                                                                                                                                                                                                                                                                                                                                                                                                                                                                                                                                                                                                                                                                                                                                                                                                                                                                                                                                                                                                                                                                                                                                                                                                                                                                                                                                                                                                                                                                                                                                                                                                                                                                                                                                                                                                                                                                                                                                                                                                                                                                                                                                                                                               | Regional Medical Sciences Center 1/1 Chiangrai                                 | National Institute of Health, Department of Medical Sciences, Ministry of Public Health, Thailand                                                                                                                                                                                                                                                              | ; Natchaya Khiahsang; Nuttida Thongpramul; Pakorn Piromtong; Pilailuk Okada; Ratana Tacharoenmuang; Siripaporn Phuyung; Sittiporn Parminen; Sunthareeya Waicharoen; Thanutsapa Thanadachakul; Warawan Wongboot; sirikanda wimol                                                                                                                                                                               |
| EPI_ISL_2877034, EPI_ISL_2877035, EPI_ISL_2877036, EPI_ISL_2877037                                                                                                                                                                                                                                                                                                                                                                                                                                                                                                                                                                                                                                                                                                                                                                                                                                                                                                                                                                                                                                                                                                                                                                                                                                                                                                                                                                                                                                                                                                                                                                                                                                                                                                                                                                                                                                                                                                                                                                                                                                                                                                                                                                                                                                                                                                                                                                                                                                                                                                                                                                                                                                                                                                                                                                                                                                                                                                                                                                                                                                                                                                                                                                                                                                                                                                                                                                                                                                                                                                                                                                                                                                                                                                                                                                                                                                                                                                                                                                                                                                                                                                                                                                                                                                                                                                                                                                                                                                                                                                                                                                                                                                                                                                                                                                                                                                                                                                                                                                                                                                                                                                                                                                                                                                                                                                                                                                                                                                                                                                                                                                                                                                                                                                                                                                                                                                                                                                                                                                                                                                                                                                                                                                                                                                                                                                                                                                                                                                                                                                                                                                                                                                                                                                                                                                                                                                                                                                                                                                                                                                                                                                                                                                                                                                                                                                                                                                                                                                                                                                                                                                                                                                                                                                                                                                                                                                                                                                                                                                                                                                                                                                                                                                                                                                                                                                                                                                                                                                                                                                                                                                                                                                                                                                                                                                                                                                                                                                                                                                                                                                                                                                                                                                                                                                                                                                                                                                                                                                                                                                                                                                                                                                                                                                                                                                                                                                                                                                                                                                                                                                                                                                                                                                                                                                                                                                                                                                                                                                                                                                                                                                                                                                                                                                                                                                                                                                                                                                                                                                                                                                                                                                                                                                                                                                                                                                                                                                                                                                                                                                                                                                                                                                                                                                                                                                                                                                                                                                                                                                                                                                                                                                                                                                                                                                                                                                                                                                                                                                                                                                                                                                                                                                                                                                                                                                                                                                                                                                                                                                                                                                                                                                                                                                                                                                                                                                                                                                             | Regional Medical Sciences Center 8 Udonthani                                   | National Institute of Health, Department of Medical Sciences, Ministry of Public Health, Thailand                                                                                                                                                                                                                                                              | ; Natchaya Khiahsang; Nuttida Thongpramul; Pakorn Piromtong; Pilailuk Okada; Ratana Tacharoenmuang; Siripaporn Phuyung; Sittiporn Parminen; Sunthareeya Waicharoen; Thanutsapa Thanadachakul; Warawan Wongboot; sirikanda wimol                                                                                                                                                                               |
| EPI_ISL_2812026, EPI_ISL_2812027                                                                                                                                                                                                                                                                                                                                                                                                                                                                                                                                                                                                                                                                                                                                                                                                                                                                                                                                                                                                                                                                                                                                                                                                                                                                                                                                                                                                                                                                                                                                                                                                                                                                                                                                                                                                                                                                                                                                                                                                                                                                                                                                                                                                                                                                                                                                                                                                                                                                                                                                                                                                                                                                                                                                                                                                                                                                                                                                                                                                                                                                                                                                                                                                                                                                                                                                                                                                                                                                                                                                                                                                                                                                                                                                                                                                                                                                                                                                                                                                                                                                                                                                                                                                                                                                                                                                                                                                                                                                                                                                                                                                                                                                                                                                                                                                                                                                                                                                                                                                                                                                                                                                                                                                                                                                                                                                                                                                                                                                                                                                                                                                                                                                                                                                                                                                                                                                                                                                                                                                                                                                                                                                                                                                                                                                                                                                                                                                                                                                                                                                                                                                                                                                                                                                                                                                                                                                                                                                                                                                                                                                                                                                                                                                                                                                                                                                                                                                                                                                                                                                                                                                                                                                                                                                                                                                                                                                                                                                                                                                                                                                                                                                                                                                                                                                                                                                                                                                                                                                                                                                                                                                                                                                                                                                                                                                                                                                                                                                                                                                                                                                                                                                                                                                                                                                                                                                                                                                                                                                                                                                                                                                                                                                                                                                                                                                                                                                                                                                                                                                                                                                                                                                                                                                                                                                                                                                                                                                                                                                                                                                                                                                                                                                                                                                                                                                                                                                                                                                                                                                                                                                                                                                                                                                                                                                                                                                                                                                                                                                                                                                                                                                                                                                                                                                                                                                                                                                                                                                                                                                                                                                                                                                                                                                                                                                                                                                                                                                                                                                                                                                                                                                                                                                                                                                                                                                                                                                                                                                                                                                                                                                                                                                                                                                                                                                                                                                                                                                               | Rembau Health Clinic                                                           | Institute for Medical Research, Infectious Disease Research Centre, National Institutes of Health, Ministry of Health Malaysia                                                                                                                                                                                                                                 | Azizan MA; Kamel K; Mohd Zawawi Z; Ramly N; Robert F; Suppiah J; Thayan R                                                                                                                                                                                                                                                                                                                                     |
| EPI_ISL_2742191, EPI_ISL_2744951, EPI_ISL_2745419, EPI_ISL_2745736, EPI_ISL_2747215, EPI_ISL_2818034                                                                                                                                                                                                                                                                                                                                                                                                                                                                                                                                                                                                                                                                                                                                                                                                                                                                                                                                                                                                                                                                                                                                                                                                                                                                                                                                                                                                                                                                                                                                                                                                                                                                                                                                                                                                                                                                                                                                                                                                                                                                                                                                                                                                                                                                                                                                                                                                                                                                                                                                                                                                                                                                                                                                                                                                                                                                                                                                                                                                                                                                                                                                                                                                                                                                                                                                                                                                                                                                                                                                                                                                                                                                                                                                                                                                                                                                                                                                                                                                                                                                                                                                                                                                                                                                                                                                                                                                                                                                                                                                                                                                                                                                                                                                                                                                                                                                                                                                                                                                                                                                                                                                                                                                                                                                                                                                                                                                                                                                                                                                                                                                                                                                                                                                                                                                                                                                                                                                                                                                                                                                                                                                                                                                                                                                                                                                                                                                                                                                                                                                                                                                                                                                                                                                                                                                                                                                                                                                                                                                                                                                                                                                                                                                                                                                                                                                                                                                                                                                                                                                                                                                                                                                                                                                                                                                                                                                                                                                                                                                                                                                                                                                                                                                                                                                                                                                                                                                                                                                                                                                                                                                                                                                                                                                                                                                                                                                                                                                                                                                                                                                                                                                                                                                                                                                                                                                                                                                                                                                                                                                                                                                                                                                                                                                                                                                                                                                                                                                                                                                                                                                                                                                                                                                                                                                                                                                                                                                                                                                                                                                                                                                                                                                                                                                                                                                                                                                                                                                                                                                                                                                                                                                                                                                                                                                                                                                                                                                                                                                                                                                                                                                                                                                                                                                                                                                                                                                                                                                                                                                                                                                                                                                                                                                                                                                                                                                                                                                                                                                                                                                                                                                                                                                                                                                                                                                                                                                                                                                                                                                                                                                                                                                                                                                                                                                                                                                           | Respiratory Virus Unit, Microbiology Services Colindale, Public Health England | COVID-19 Genomics UK (COG-UK) Consortium                                                                                                                                                                                                                                                                                                                       | PHE Covid Sequencing Team                                                                                                                                                                                                                                                                                                                                                                                     |
| EPI_ISL_2798352, EPI_ISL_2798988                                                                                                                                                                                                                                                                                                                                                                                                                                                                                                                                                                                                                                                                                                                                                                                                                                                                                                                                                                                                                                                                                                                                                                                                                                                                                                                                                                                                                                                                                                                                                                                                                                                                                                                                                                                                                                                                                                                                                                                                                                                                                                                                                                                                                                                                                                                                                                                                                                                                                                                                                                                                                                                                                                                                                                                                                                                                                                                                                                                                                                                                                                                                                                                                                                                                                                                                                                                                                                                                                                                                                                                                                                                                                                                                                                                                                                                                                                                                                                                                                                                                                                                                                                                                                                                                                                                                                                                                                                                                                                                                                                                                                                                                                                                                                                                                                                                                                                                                                                                                                                                                                                                                                                                                                                                                                                                                                                                                                                                                                                                                                                                                                                                                                                                                                                                                                                                                                                                                                                                                                                                                                                                                                                                                                                                                                                                                                                                                                                                                                                                                                                                                                                                                                                                                                                                                                                                                                                                                                                                                                                                                                                                                                                                                                                                                                                                                                                                                                                                                                                                                                                                                                                                                                                                                                                                                                                                                                                                                                                                                                                                                                                                                                                                                                                                                                                                                                                                                                                                                                                                                                                                                                                                                                                                                                                                                                                                                                                                                                                                                                                                                                                                                                                                                                                                                                                                                                                                                                                                                                                                                                                                                                                                                                                                                                                                                                                                                                                                                                                                                                                                                                                                                                                                                                                                                                                                                                                                                                                                                                                                                                                                                                                                                                                                                                                                                                                                                                                                                                                                                                                                                                                                                                                                                                                                                                                                                                                                                                                                                                                                                                                                                                                                                                                                                                                                                                                                                                                                                                                                                                                                                                                                                                                                                                                                                                                                                                                                                                                                                                                                                                                                                                                                                                                                                                                                                                                                                                                                                                                                                                                                                                                                                                                                                                                                                                                                                                                                                               | Riga East University Hospital, National Microbiology Reference Laboratory      | Riga East University Hospital, National Microbiology Reference Laboratory; Eurofins Genomics Europe Sequencing GmbH                                                                                                                                                                                                                                            | Arzu Algulieva; Diāna Dušacka; Dārta Pūpola; Ilva Pole; Jevgenijs Bodrenko; Jūlija Čevere; Reinis Vangravs; Reinis Zeltmatis; Sergejs Nīkišins; Girts Šķenders                                                                                                                                                                                                                                                |
| EPI_ISL_2321160, EPI_ISL_2839562, EPI_ISL_2839563                                                                                                                                                                                                                                                                                                                                                                                                                                                                                                                                                                                                                                                                                                                                                                                                                                                                                                                                                                                                                                                                                                                                                                                                                                                                                                                                                                                                                                                                                                                                                                                                                                                                                                                                                                                                                                                                                                                                                                                                                                                                                                                                                                                                                                                                                                                                                                                                                                                                                                                                                                                                                                                                                                                                                                                                                                                                                                                                                                                                                                                                                                                                                                                                                                                                                                                                                                                                                                                                                                                                                                                                                                                                                                                                                                                                                                                                                                                                                                                                                                                                                                                                                                                                                                                                                                                                                                                                                                                                                                                                                                                                                                                                                                                                                                                                                                                                                                                                                                                                                                                                                                                                                                                                                                                                                                                                                                                                                                                                                                                                                                                                                                                                                                                                                                                                                                                                                                                                                                                                                                                                                                                                                                                                                                                                                                                                                                                                                                                                                                                                                                                                                                                                                                                                                                                                                                                                                                                                                                                                                                                                                                                                                                                                                                                                                                                                                                                                                                                                                                                                                                                                                                                                                                                                                                                                                                                                                                                                                                                                                                                                                                                                                                                                                                                                                                                                                                                                                                                                                                                                                                                                                                                                                                                                                                                                                                                                                                                                                                                                                                                                                                                                                                                                                                                                                                                                                                                                                                                                                                                                                                                                                                                                                                                                                                                                                                                                                                                                                                                                                                                                                                                                                                                                                                                                                                                                                                                                                                                                                                                                                                                                                                                                                                                                                                                                                                                                                                                                                                                                                                                                                                                                                                                                                                                                                                                                                                                                                                                                                                                                                                                                                                                                                                                                                                                                                                                                                                                                                                                                                                                                                                                                                                                                                                                                                                                                                                                                                                                                                                                                                                                                                                                                                                                                                                                                                                                                                                                                                                                                                                                                                                                                                                                                                                                                                                                                                                                              | Royal Darwin Hospital Pathology                                                | MDU-PHL                                                                                                                                                                                                                                                                                                                                                        | Caly L.; Druce J.; M.L.; Meumann, E.; N.L.; Sait; Seemann T.; Sherry                                                                                                                                                                                                                                                                                                                                          |
| EPI_ISL_2250189, EPI_ISL_2250190, EPI_ISL_2250191, EPI_ISL_2250196, EPI_ISL_2250197, EPI_ISL_2250198, EPI_ISL_2250200, EPI_ISL_2250202, EPI_ISL_2250204, EPI_ISL_2250206, EPI_ISL_2250207, EPI_ISL_2250216, EPI_ISL_2250218, EPI_ISL_2250219, EPI_ISL_2250220                                                                                                                                                                                                                                                                                                                                                                                                                                                                                                                                                                                                                                                                                                                                                                                                                                                                                                                                                                                                                                                                                                                                                                                                                                                                                                                                                                                                                                                                                                                                                                                                                                                                                                                                                                                                                                                                                                                                                                                                                                                                                                                                                                                                                                                                                                                                                                                                                                                                                                                                                                                                                                                                                                                                                                                                                                                                                                                                                                                                                                                                                                                                                                                                                                                                                                                                                                                                                                                                                                                                                                                                                                                                                                                                                                                                                                                                                                                                                                                                                                                                                                                                                                                                                                                                                                                                                                                                                                                                                                                                                                                                                                                                                                                                                                                                                                                                                                                                                                                                                                                                                                                                                                                                                                                                                                                                                                                                                                                                                                                                                                                                                                                                                                                                                                                                                                                                                                                                                                                                                                                                                                                                                                                                                                                                                                                                                                                                                                                                                                                                                                                                                                                                                                                                                                                                                                                                                                                                                                                                                                                                                                                                                                                                                                                                                                                                                                                                                                                                                                                                                                                                                                                                                                                                                                                                                                                                                                                                                                                                                                                                                                                                                                                                                                                                                                                                                                                                                                                                                                                                                                                                                                                                                                                                                                                                                                                                                                                                                                                                                                                                                                                                                                                                                                                                                                                                                                                                                                                                                                                                                                                                                                                                                                                                                                                                                                                                                                                                                                                                                                                                                                                                                                                                                                                                                                                                                                                                                                                                                                                                                                                                                                                                                                                                                                                                                                                                                                                                                                                                                                                                                                                                                                                                                                                                                                                                                                                                                                                                                                                                                                                                                                                                                                                                                                                                                                                                                                                                                                                                                                                                                                                                                                                                                                                                                                                                                                                                                                                                                                                                                                                                                                                                                                                                                                                                                                                                                                                                                                                                                                                                                                                                                                                  |                                                                                |                                                                                                                                                                                                                                                                                                                                                                |                                                                                                                                                                                                                                                                                                                                                                                                               |
| see above                                                                                                                                                                                                                                                                                                                                                                                                                                                                                                                                                                                                                                                                                                                                                                                                                                                                                                                                                                                                                                                                                                                                                                                                                                                                                                                                                                                                                                                                                                                                                                                                                                                                                                                                                                                                                                                                                                                                                                                                                                                                                                                                                                                                                                                                                                                                                                                                                                                                                                                                                                                                                                                                                                                                                                                                                                                                                                                                                                                                                                                                                                                                                                                                                                                                                                                                                                                                                                                                                                                                                                                                                                                                                                                                                                                                                                                                                                                                                                                                                                                                                                                                                                                                                                                                                                                                                                                                                                                                                                                                                                                                                                                                                                                                                                                                                                                                                                                                                                                                                                                                                                                                                                                                                                                                                                                                                                                                                                                                                                                                                                                                                                                                                                                                                                                                                                                                                                                                                                                                                                                                                                                                                                                                                                                                                                                                                                                                                                                                                                                                                                                                                                                                                                                                                                                                                                                                                                                                                                                                                                                                                                                                                                                                                                                                                                                                                                                                                                                                                                                                                                                                                                                                                                                                                                                                                                                                                                                                                                                                                                                                                                                                                                                                                                                                                                                                                                                                                                                                                                                                                                                                                                                                                                                                                                                                                                                                                                                                                                                                                                                                                                                                                                                                                                                                                                                                                                                                                                                                                                                                                                                                                                                                                                                                                                                                                                                                                                                                                                                                                                                                                                                                                                                                                                                                                                                                                                                                                                                                                                                                                                                                                                                                                                                                                                                                                                                                                                                                                                                                                                                                                                                                                                                                                                                                                                                                                                                                                                                                                                                                                                                                                                                                                                                                                                                                                                                                                                                                                                                                                                                                                                                                                                                                                                                                                                                                                                                                                                                                                                                                                                                                                                                                                                                                                                                                                                                                                                                                                                                                                                                                                                                                                                                                                                                                                                                                                                                                                                      | Royal Darwin Hospital Pathology                                                | Microbiological Diagnostic Unit Public Health Laboratory (MDU-PHL)                                                                                                                                                                                                                                                                                             | Caly L.; Druce J.; M.L.; Meumann, E.; N.L.; Sait; Seemann T.; Sherry                                                                                                                                                                                                                                                                                                                                          |
| EPI_ISL_1969246, EPI_ISL_1969247                                                                                                                                                                                                                                                                                                                                                                                                                                                                                                                                                                                                                                                                                                                                                                                                                                                                                                                                                                                                                                                                                                                                                                                                                                                                                                                                                                                                                                                                                                                                                                                                                                                                                                                                                                                                                                                                                                                                                                                                                                                                                                                                                                                                                                                                                                                                                                                                                                                                                                                                                                                                                                                                                                                                                                                                                                                                                                                                                                                                                                                                                                                                                                                                                                                                                                                                                                                                                                                                                                                                                                                                                                                                                                                                                                                                                                                                                                                                                                                                                                                                                                                                                                                                                                                                                                                                                                                                                                                                                                                                                                                                                                                                                                                                                                                                                                                                                                                                                                                                                                                                                                                                                                                                                                                                                                                                                                                                                                                                                                                                                                                                                                                                                                                                                                                                                                                                                                                                                                                                                                                                                                                                                                                                                                                                                                                                                                                                                                                                                                                                                                                                                                                                                                                                                                                                                                                                                                                                                                                                                                                                                                                                                                                                                                                                                                                                                                                                                                                                                                                                                                                                                                                                                                                                                                                                                                                                                                                                                                                                                                                                                                                                                                                                                                                                                                                                                                                                                                                                                                                                                                                                                                                                                                                                                                                                                                                                                                                                                                                                                                                                                                                                                                                                                                                                                                                                                                                                                                                                                                                                                                                                                                                                                                                                                                                                                                                                                                                                                                                                                                                                                                                                                                                                                                                                                                                                                                                                                                                                                                                                                                                                                                                                                                                                                                                                                                                                                                                                                                                                                                                                                                                                                                                                                                                                                                                                                                                                                                                                                                                                                                                                                                                                                                                                                                                                                                                                                                                                                                                                                                                                                                                                                                                                                                                                                                                                                                                                                                                                                                                                                                                                                                                                                                                                                                                                                                                                                                                                                                                                                                                                                                                                                                                                                                                                                                                                                                                                               | Rumah Sakit Umum Daerah Palangkaraya                                           | National Institute of Health Research and Development                                                                                                                                                                                                                                                                                                          | Arie Ardiansyah Nugraha; Hana Apsari Pawestri; Hartanti Dian Ikawati; Kartika Dewi Puspa; Krisna Pangesti; Nelly Puspandari; Subangkit; Triyani Soekarso; Vivi Setiawaty                                                                                                                                                                                                                                      |
| EPI_ISL_2840618                                                                                                                                                                                                                                                                                                                                                                                                                                                                                                                                                                                                                                                                                                                                                                                                                                                                                                                                                                                                                                                                                                                                                                                                                                                                                                                                                                                                                                                                                                                                                                                                                                                                                                                                                                                                                                                                                                                                                                                                                                                                                                                                                                                                                                                                                                                                                                                                                                                                                                                                                                                                                                                                                                                                                                                                                                                                                                                                                                                                                                                                                                                                                                                                                                                                                                                                                                                                                                                                                                                                                                                                                                                                                                                                                                                                                                                                                                                                                                                                                                                                                                                                                                                                                                                                                                                                                                                                                                                                                                                                                                                                                                                                                                                                                                                                                                                                                                                                                                                                                                                                                                                                                                                                                                                                                                                                                                                                                                                                                                                                                                                                                                                                                                                                                                                                                                                                                                                                                                                                                                                                                                                                                                                                                                                                                                                                                                                                                                                                                                                                                                                                                                                                                                                                                                                                                                                                                                                                                                                                                                                                                                                                                                                                                                                                                                                                                                                                                                                                                                                                                                                                                                                                                                                                                                                                                                                                                                                                                                                                                                                                                                                                                                                                                                                                                                                                                                                                                                                                                                                                                                                                                                                                                                                                                                                                                                                                                                                                                                                                                                                                                                                                                                                                                                                                                                                                                                                                                                                                                                                                                                                                                                                                                                                                                                                                                                                                                                                                                                                                                                                                                                                                                                                                                                                                                                                                                                                                                                                                                                                                                                                                                                                                                                                                                                                                                                                                                                                                                                                                                                                                                                                                                                                                                                                                                                                                                                                                                                                                                                                                                                                                                                                                                                                                                                                                                                                                                                                                                                                                                                                                                                                                                                                                                                                                                                                                                                                                                                                                                                                                                                                                                                                                                                                                                                                                                                                                                                                                                                                                                                                                                                                                                                                                                                                                                                                                                                                                                                | S.C. Laboratorio Analisi, ASL 3 Liguria                                        | U.O. Igiene, Ospedale Policlinico San Martino                                                                                                                                                                                                                                                                                                                  | Bruzzese Bianca; Caligiuri Patrizia; De Pace Vanessa; Domnich Alexander; Icardi Giancarlo on behalf of SARS-CoV-2 ITALIAN RESEARCH ENTERPRISE (SCIRE) Collaborative Group; Orsi Andrea; Ricucci Valentina; Spitaleri Antonino                                                                                                                                                                                 |
| EPI_ISL_2462342, EPI_ISL_2462343, EPI_ISL_2462344, EPI_ISL_2462345, EPI_ISL_2462346, EPI_ISL_2462348, EPI_ISL_2462359, EPI_ISL_2462364, EPI_ISL_2462367, EPI_ISL_2462368, EPI_ISL_2839979, EPI_ISL_2839980, EPI_ISL_2839982, EPI_ISL_2839989, EPI_ISL_2839993                                                                                                                                                                                                                                                                                                                                                                                                                                                                                                                                                                                                                                                                                                                                                                                                                                                                                                                                                                                                                                                                                                                                                                                                                                                                                                                                                                                                                                                                                                                                                                                                                                                                                                                                                                                                                                                                                                                                                                                                                                                                                                                                                                                                                                                                                                                                                                                                                                                                                                                                                                                                                                                                                                                                                                                                                                                                                                                                                                                                                                                                                                                                                                                                                                                                                                                                                                                                                                                                                                                                                                                                                                                                                                                                                                                                                                                                                                                                                                                                                                                                                                                                                                                                                                                                                                                                                                                                                                                                                                                                                                                                                                                                                                                                                                                                                                                                                                                                                                                                                                                                                                                                                                                                                                                                                                                                                                                                                                                                                                                                                                                                                                                                                                                                                                                                                                                                                                                                                                                                                                                                                                                                                                                                                                                                                                                                                                                                                                                                                                                                                                                                                                                                                                                                                                                                                                                                                                                                                                                                                                                                                                                                                                                                                                                                                                                                                                                                                                                                                                                                                                                                                                                                                                                                                                                                                                                                                                                                                                                                                                                                                                                                                                                                                                                                                                                                                                                                                                                                                                                                                                                                                                                                                                                                                                                                                                                                                                                                                                                                                                                                                                                                                                                                                                                                                                                                                                                                                                                                                                                                                                                                                                                                                                                                                                                                                                                                                                                                                                                                                                                                                                                                                                                                                                                                                                                                                                                                                                                                                                                                                                                                                                                                                                                                                                                                                                                                                                                                                                                                                                                                                                                                                                                                                                                                                                                                                                                                                                                                                                                                                                                                                                                                                                                                                                                                                                                                                                                                                                                                                                                                                                                                                                                                                                                                                                                                                                                                                                                                                                                                                                                                                                                                                                                                                                                                                                                                                                                                                                                                                                                                                                                                                                                  |                                                                                |                                                                                                                                                                                                                                                                                                                                                                |                                                                                                                                                                                                                                                                                                                                                                                                               |
| see above                                                                                                                                                                                                                                                                                                                                                                                                                                                                                                                                                                                                                                                                                                                                                                                                                                                                                                                                                                                                                                                                                                                                                                                                                                                                                                                                                                                                                                                                                                                                                                                                                                                                                                                                                                                                                                                                                                                                                                                                                                                                                                                                                                                                                                                                                                                                                                                                                                                                                                                                                                                                                                                                                                                                                                                                                                                                                                                                                                                                                                                                                                                                                                                                                                                                                                                                                                                                                                                                                                                                                                                                                                                                                                                                                                                                                                                                                                                                                                                                                                                                                                                                                                                                                                                                                                                                                                                                                                                                                                                                                                                                                                                                                                                                                                                                                                                                                                                                                                                                                                                                                                                                                                                                                                                                                                                                                                                                                                                                                                                                                                                                                                                                                                                                                                                                                                                                                                                                                                                                                                                                                                                                                                                                                                                                                                                                                                                                                                                                                                                                                                                                                                                                                                                                                                                                                                                                                                                                                                                                                                                                                                                                                                                                                                                                                                                                                                                                                                                                                                                                                                                                                                                                                                                                                                                                                                                                                                                                                                                                                                                                                                                                                                                                                                                                                                                                                                                                                                                                                                                                                                                                                                                                                                                                                                                                                                                                                                                                                                                                                                                                                                                                                                                                                                                                                                                                                                                                                                                                                                                                                                                                                                                                                                                                                                                                                                                                                                                                                                                                                                                                                                                                                                                                                                                                                                                                                                                                                                                                                                                                                                                                                                                                                                                                                                                                                                                                                                                                                                                                                                                                                                                                                                                                                                                                                                                                                                                                                                                                                                                                                                                                                                                                                                                                                                                                                                                                                                                                                                                                                                                                                                                                                                                                                                                                                                                                                                                                                                                                                                                                                                                                                                                                                                                                                                                                                                                                                                                                                                                                                                                                                                                                                                                                                                                                                                                                                                                                                                      | SA Pathology                                                                   | SA Pathology                                                                                                                                                                                                                                                                                                                                                   | Caitlin Selway; Chuan Kok Lim; Geoff Higgins; Ivan Bastian; Lex Leong; Mark Turra                                                                                                                                                                                                                                                                                                                             |
| EPI_ISL_1927305, EPI_ISL_1927400, EPI_ISL_1927401, EPI_ISL_1927403, EPI_ISL_1927404, EPI_ISL_1927405, EPI_ISL_1927407, EPI_ISL_1927408, EPI_ISL_1927410, EPI_ISL_1927411, EPI_ISL_1927413, EPI_ISL_1927414, EPI_ISL_1927416, EPI_ISL_1927417, EPI_ISL_1927419, EPI_ISL_1927420, EPI_ISL_1927422, EPI_ISL_1927423, EPI_ISL_1927424, EPI_ISL_1927426, EPI_ISL_2131671, EPI_ISL_2131672, EPI_ISL_2131673, EPI_ISL_2131676, EPI_ISL_2131677, EPI_ISL_2131691, EPI_ISL_2131692, EPI_ISL_2131693, EPI_ISL_2131694, EPI_ISL_2131695, EPI_ISL_2131696, EPI_ISL_2131697, EPI_ISL_2131698, EPI_ISL_2131701, EPI_ISL_2131702, EPI_ISL_2131703, EPI_ISL_2131704, EPI_ISL_2131705, EPI_ISL_2131706, EPI_ISL_2131708, EPI_ISL_2131709, EPI_ISL_2131712, EPI_ISL_2131714, EPI_ISL_2131716, EPI_ISL_2131717, EPI_ISL_2131719, EPI_ISL_2131721, EPI_ISL_2131724, EPI_ISL_2131725, EPI_ISL_2131726, EPI_ISL_2131730, EPI_ISL_2131731, EPI_ISL_2131732, EPI_ISL_2131733, EPI_ISL_2131734, EPI_ISL_2131736, EPI_ISL_2131738, EPI_ISL_2131744, EPI_ISL_2131748, EPI_ISL_2131764, EPI_ISL_2131769, EPI_ISL_2253111, EPI_ISL_2253121, EPI_ISL_2329929, EPI_ISL_2447617, EPI_ISL_2447667, EPI_ISL_2621755, EPI_ISL_2621756, EPI_ISL_2621759, EPI_ISL_2621760, EPI_ISL_2621761, EPI_ISL_2621770, EPI_ISL_2674810, EPI_ISL_2760890, EPI_ISL_2761075, EPI_ISL_2762358, EPI_ISL_2765503, EPI_ISL_2770204, EPI_ISL_2770210, EPI_ISL_2770211, EPI_ISL_2771592, EPI_ISL_2771593, EPI_ISL_2776922, EPI_ISL_2776923, EPI_ISL_2776924, EPI_ISL_2776925, EPI_ISL_2776926, EPI_ISL_2776927, EPI_ISL_2776928, EPI_ISL_2776929, EPI_ISL_2776930, EPI_ISL_2776931, EPI_ISL_2776932, EPI_ISL_2776933, EPI_ISL_2776934, EPI_ISL_2776935, EPI_ISL_2776936, EPI_ISL_2776937, EPI_ISL_2776938, EPI_ISL_2776939, EPI_ISL_2776940, EPI_ISL_2776941, EPI_ISL_2776942, EPI_ISL_2776943, EPI_ISL_2776944, EPI_ISL_2776945, EPI_ISL_2776946, EPI_ISL_2776947, EPI_ISL_2776948, EPI_ISL_2776949, EPI_ISL_2776950, EPI_ISL_2776951, EPI_ISL_2776952, EPI_ISL_2776953, EPI_ISL_2776954, EPI_ISL_2776955, EPI_ISL_2776956, EPI_ISL_2776957, EPI_ISL_2776958, EPI_ISL_2776959, EPI_ISL_2776960, EPI_ISL_2776961, EPI_ISL_2776962, EPI_ISL_2776963, EPI_ISL_2776964, EPI_ISL_2776965, EPI_ISL_2776966, EPI_ISL_2776967, EPI_ISL_2776968, EPI_ISL_2776969, EPI_ISL_2776970, EPI_ISL_2776971, EPI_ISL_2776972, EPI_ISL_2776973, EPI_ISL_2776974, EPI_ISL_2776975, EPI_ISL_2776976, EPI_ISL_2776977, EPI_ISL_2776978, EPI_ISL_2776979, EPI_ISL_2776980, EPI_ISL_2776981, EPI_ISL_2776982, EPI_ISL_2776983, EPI_ISL_2776984, EPI_ISL_2776985, EPI_ISL_2776986, EPI_ISL_2776987, EPI_ISL_2776988, EPI_ISL_2776989, EPI_ISL_2776990, EPI_ISL_2776991, EPI_ISL_2776992, EPI_ISL_2776993, EPI_ISL_2776994, EPI_ISL_2776995, EPI_ISL_2776996, EPI_ISL_2776997, EPI_ISL_2776998, EPI_ISL_2776999, EPI_ISL_2777000, EPI_ISL_2777001, EPI_ISL_2777002, EPI_ISL_2777003, EPI_ISL_2777004, EPI_ISL_2777005, EPI_ISL_2777006, EPI_ISL_2777007, EPI_ISL_2777008, EPI_ISL_2777009, EPI_ISL_2777010, EPI_ISL_2777011, EPI_ISL_2777012, EPI_ISL_2777013, EPI_ISL_2777014, EPI_ISL_2777015, EPI_ISL_2777016, EPI_ISL_2777017, EPI_ISL_2777018, EPI_ISL_2777019, EPI_ISL_2777020, EPI_ISL_2777021, EPI_ISL_2777022, EPI_ISL_2777023, EPI_ISL_2777024, EPI_ISL_2777025, EPI_ISL_2777026, EPI_ISL_2777027, EPI_ISL_2777028, EPI_ISL_2777029, EPI_ISL_2777030, EPI_ISL_2777031, EPI_ISL_2777032, EPI_ISL_2777033, EPI_ISL_2777034, EPI_ISL_2777035, EPI_ISL_2777036, EPI_ISL_2777037, EPI_ISL_2777038, EPI_ISL_2777039, EPI_ISL_2777040, EPI_ISL_2777041, EPI_ISL_2777042, EPI_ISL_2777043, EPI_ISL_2777044, EPI_ISL_2777045, EPI_ISL_2777046, EPI_ISL_2777047, EPI_ISL_2777048, EPI_ISL_2777049, EPI_ISL_2777050, EPI_ISL_2777051, EPI_ISL_2777052, EPI_ISL_2777053, EPI_ISL_2777054, EPI_ISL_2777055, EPI_ISL_2777056, EPI_ISL_2777057, EPI_ISL_2777058, EPI_ISL_2777059, EPI_ISL_2777060, EPI_ISL_2777061, EPI_ISL_2777062, EPI_ISL_2777063, EPI_ISL_2777064, EPI_ISL_2777065, EPI_ISL_2777066, EPI_ISL_2777067, EPI_ISL_2777068, EPI_ISL_2777069, EPI_ISL_2777070, EPI_ISL_2777071, EPI_ISL_2777072, EPI_ISL_2777073, EPI_ISL_2777074, EPI_ISL_2777075, EPI_ISL_2777076, EPI_ISL_2777077, EPI_ISL_2777078, EPI_ISL_2777079, EPI_ISL_2777080, EPI_ISL_2777081, EPI_ISL_2777082, EPI_ISL_2777083, EPI_ISL_2777084, EPI_ISL_2777085, EPI_ISL_2777086, EPI_ISL_2777087, EPI_ISL_2777088, EPI_ISL_2777089, EPI_ISL_2777090, EPI_ISL_2777091, EPI_ISL_2777092, EPI_ISL_2777093, EPI_ISL_2777094, EPI_ISL_2777095, EPI_ISL_2777096, EPI_ISL_2777097, EPI_ISL_2777098, EPI_ISL_2777099, EPI_ISL_2777100, EPI_ISL_2777101, EPI_ISL_2777102, EPI_ISL_2777103, EPI_ISL_2777104, EPI_ISL_2777105, EPI_ISL_2777106, EPI_ISL_2777107, EPI_ISL_2777108, EPI_ISL_2777109, EPI_ISL_2777110, EPI_ISL_2777111, EPI_ISL_2777112, EPI_ISL_2777113, EPI_ISL_2777114, EPI_ISL_2777115, EPI_ISL_2777116, EPI_ISL_2777117, EPI_ISL_2777118, EPI_ISL_2777119, EPI_ISL_2777120, EPI_ISL_2777121, EPI_ISL_2777122, EPI_ISL_2777123, EPI_ISL_2777124, EPI_ISL_2777125, EPI_ISL_2777126, EPI_ISL_2777127, EPI_ISL_2777128, EPI_ISL_2777129, EPI_ISL_2777130, EPI_ISL_2777131, EPI_ISL_2777132, EPI_ISL_2777133, EPI_ISL_2777134, EPI_ISL_2777135, EPI_ISL_2777136, EPI_ISL_2777137, EPI_ISL_2777138, EPI_ISL_2777139, EPI_ISL_2777140, EPI_ISL_2777141, EPI_ISL_2777142, EPI_ISL_2777143, EPI_ISL_2777144, EPI_ISL_2777145, EPI_ISL_2777146, EPI_ISL_2777147, EPI_ISL_2777148, EPI_ISL_2777149, EPI_ISL_2777150, EPI_ISL_2777151, EPI_ISL_2777152, EPI_ISL_2777153, EPI_ISL_2777154, EPI_ISL_2777155, EPI_ISL_2777156, EPI_ISL_2777157, EPI_ISL_2777158, EPI_ISL_2777159, EPI_ISL_2777160, EPI_ISL_2777161, EPI_ISL_2777162, EPI_ISL_2777163, EPI_ISL_2777164, EPI_ISL_2777165, EPI_ISL_2777166, EPI_ISL_2777167, EPI_ISL_2777168, EPI_ISL_2777169, EPI_ISL_2777170, EPI_ISL_2777171, EPI_ISL_2777172, EPI_ISL_2777173, EPI_ISL_2777174, EPI_ISL_2777175, EPI_ISL_2777176, EPI_ISL_2777177, EPI_ISL_2777178, EPI_ISL_2777179, EPI_ISL_2777180, EPI_ISL_2777181, EPI_ISL_2777182, EPI_ISL_2777183, EPI_ISL_2777184, EPI_ISL_2777185, EPI_ISL_2777186, EPI_ISL_2777187, EPI_ISL_2777188, EPI_ISL_2777189, EPI_ISL_2777190, EPI_ISL_2777191, EPI_ISL_2777192, EPI_ISL_2777193, EPI_ISL_2777194, EPI_ISL_2777195, EPI_ISL_2777196, EPI_ISL_2777197, EPI_ISL_2777198, EPI_ISL_2777199, EPI_ISL_2777200, EPI_ISL_2777201, EPI_ISL_2777202, EPI_ISL_2777203, EPI_ISL_2777204, EPI_ISL_2777205, EPI_ISL_2777206, EPI_ISL_2777207, EPI_ISL_2777208, EPI_ISL_2777209, EPI_ISL_2777210, EPI_ISL_2777211, EPI_ISL_2777212, EPI_ISL_2777213, EPI_ISL_2777214, EPI_ISL_2777215, EPI_ISL_2777216, EPI_ISL_2777217, EPI_ISL_2777218, EPI_ISL_2777219, EPI_ISL_2777220, EPI_ISL_2777221, EPI_ISL_2777222, EPI_ISL_2777223, EPI_ISL_2777224, EPI_ISL_2777225, EPI_ISL_2777226, EPI_ISL_2777227, EPI_ISL_2777228, EPI_ISL_2777229, EPI_ISL_2777230, EPI_ISL_2777231, EPI_ISL_2777232, EPI_ISL_2777233, EPI_ISL_2777234, EPI_ISL_2777235, EPI_ISL_2777236, EPI_ISL_2777237, EPI_ISL_2777238, EPI_ISL_2777239, EPI_ISL_2777240, EPI_ISL_2777241, EPI_ISL_2777242, EPI_ISL_2777243, EPI_ISL_2777244, EPI_ISL_2777245, EPI_ISL_2777246, EPI_ISL_2777247, EPI_ISL_2777248, EPI_ISL_2777249, EPI_ISL_2777250, EPI_ISL_2777251, EPI_ISL_2777252, EPI_ISL_2777253, EPI_ISL_2777254, EPI_ISL_2777255, EPI_ISL_2777256, EPI_ISL_2777257, EPI_ISL_2777258, EPI_ISL_2777259, EPI_ISL_2777260, EPI_ISL_2777261, EPI_ISL_2777262, EPI_ISL_2777263, EPI_ISL_2777264, EPI_ISL_2777265, EPI_ISL_2777266, EPI_ISL_2777267, EPI_ISL_2777268, EPI_ISL_2777269, EPI_ISL_2777270, EPI_ISL_2777271, EPI_ISL_2777272, EPI_ISL_2777273, EPI_ISL_2777274, EPI_ISL_2777275, EPI_ISL_2777276, EPI_ISL_2777277, EPI_ISL_2777278, EPI_ISL_2777279, EPI_ISL_2777280, EPI_ISL_2777281, EPI_ISL_2777282, EPI_ISL_2777283, EPI_ISL_2777284, EPI_ISL_2777285, EPI_ISL_2777286, EPI_ISL_2777287, EPI_ISL_2777288, EPI_ISL_2777289, EPI_ISL_2777290, EPI_ISL_2777291, EPI_ISL_2777292, EPI_ISL_2777293, EPI_ISL_2777294, EPI_ISL_2777295, EPI_ISL_2777296, EPI_ISL_2777297, EPI_ISL_2777298, EPI_ISL_2777299, EPI_ISL_2777300, EPI_ISL_2777301, EPI_ISL_2777302, EPI_ISL_2777303, EPI_ISL_2777304, EPI_ISL_2777305, EPI_ISL_2777306, EPI_ISL_2777307, EPI_ISL_2777308, EPI_ISL_2777309, EPI_ISL_2777310, EPI_ISL_2777311, EPI_ISL_2777312, EPI_ISL_2777313, EPI_ISL_2777314, EPI_ISL_2777315, EPI_ISL_2777316, EPI_ISL_2777317, EPI_ISL_2777318, EPI_ISL_2777319, EPI_ISL_2777320, EPI_ISL_2777321, EPI_ISL_2777322, EPI_ISL_2777323, EPI_ISL_2777324, EPI_ISL_2777325, EPI_ISL_2777326, EPI_ISL_2777327, EPI_ISL_2777328, EPI_ISL_2777329, EPI_ISL_2777330, EPI_ISL_2777331, EPI_ISL_2777332, EPI_ISL_2777333, EPI_ISL_2777334, EPI_ISL_2777335, EPI_ISL_2777336, EPI_ISL_2777337, EPI_ISL_2777338, EPI_ISL_2777339, EPI_ISL_2777340, EPI_ISL_2777341, EPI_ISL_2777342, EPI_ISL_2777343, EPI_ISL_2777344, EPI_ISL_2777345, EPI_ISL_2777346, EPI_ISL_2777347, EPI_ISL_2777348, EPI_ISL_2777349, EPI_ISL_2777350, EPI_ISL_2777351, EPI_ISL_2777352, EPI_ISL_2777353, EPI_ISL_2777354, EPI_ISL_2777355, EPI_ISL_2777356, EPI_ISL_2777357, EPI_ISL_2777358, EPI_ISL_2777359, EPI_ISL_2777360, EPI_ISL_2777361, EPI_ISL_2777362, EPI_ISL_2777363, EPI_ISL_2777364, EPI_ISL_2777365, EPI_ISL_2777366, EPI_ISL_2777367, EPI_ISL_2777368, EPI_ISL_2777369, EPI_ISL_2777370, EPI_ISL_2777371, EPI_ISL_2777372, EPI_ISL_2777373, EPI_ISL_2777374, EPI_ISL_2777375, EPI_ISL_2777376, EPI_ISL_2777377, EPI_ISL_2777378, EPI_ISL_2777379, EPI_ISL_2777380, EPI_ISL_2777381, EPI_ISL_2777382, EPI_ISL_2777383, EPI_ISL_2777384, EPI_ISL_2777385, EPI_ISL_2777386, EPI_ISL_2777387, EPI_ISL_2777388, EPI_ISL_2777389, EPI_ISL_2777390, EPI_ISL_2777391, EPI_ISL_2777392, EPI_ISL_2777393, EPI_ISL_2777394, EPI_ISL_2777395, EPI_ISL_2777396, EPI_ISL_2777397, EPI_ISL_2777398, EPI_ISL_2777399, EPI_ISL_2777400, EPI_ISL_2777401, EPI_ISL_2777402, EPI_ISL_2777403, EPI_ISL_2777404, EPI_ISL_2777405, EPI_ISL_2777406, EPI_ISL_2777407, EPI_ISL_2777408, EPI_ISL_2777409, EPI_ISL_2777410, EPI_ISL_2777411, EPI_ISL_2777412, EPI_ISL_2777413, EPI_ISL_2777414, EPI_ISL_2777415, EPI_ISL_2777416, EPI_ISL_2777417, EPI_ISL_2777418, EPI_ISL_2777419, EPI_ISL_2777420, EPI_ISL_2777421, EPI_ISL_2777422, EPI_ISL_2777423, EPI_ISL_2777424, EPI_ISL_2777425, EPI_ISL_2777426, EPI_ISL_2777427, EPI_ISL_2777428, EPI_ISL_2777429, EPI_ISL_2777430, EPI_ISL_2777431, EPI_ISL_2777432, EPI_ISL_2777433, EPI_ISL_2777434, EPI_ISL_2777435, EPI_ISL_2777436, EPI_ISL_2777437, EPI_ISL_2777438, EPI_ISL_2777439, EPI_ISL_2777440, EPI_ISL_2777441, EPI_ISL_2777442, EPI_ISL_2777443, EPI_ISL_2777444, EPI_ISL_2777445, EPI_ISL_2777446, EPI_ISL_2777447, EPI_ISL_2777448, EPI_ISL_2777449, EPI_ISL_2777450, EPI_ISL_2777451, EPI_ISL_2777452, EPI_ISL_2777453, EPI_ISL_2777454, EPI_ISL_2777455, EPI_ISL_2777456, EPI_ISL_2777457, EPI_ISL_2777458, EPI_ISL_2777459, EPI_ISL_2777460, EPI_ISL_2777461, EPI_ISL_2777462, EPI_ISL_2777463, EPI_ISL_2777464, EPI_ISL_2777465, EPI_ISL_2777466, EPI_ISL_2777467, EPI_ISL_2777468, EPI_ISL_2777469, EPI_ISL_2777470, EPI_ISL_2777471, EPI_ISL_2777472, EPI_ISL_2777473, EPI_ISL_2777474, EPI_ISL_2777475, EPI_ISL_2777476, EPI_ISL_2777477, EPI_ISL_2777478, EPI_ISL_2777479, EPI_ISL_2777480, EPI_ISL_2777481, EPI_ISL_2777482, EPI_ISL_2777483, EPI_ISL_2777484, EPI_ISL_2777485, EPI_ISL_2777486, EPI_ISL_2777487, EPI_ISL_2777488, EPI_ISL_2777489, EPI_ISL_2777490, EPI_ISL_2777491, EPI_ISL_2777492, EPI_ISL_2777493, EPI_ISL_2777494, EPI_ISL_2777495, EPI_ISL_2777496, EPI_ISL_2777497, EPI_ISL_2777498, EPI_ISL_2777499, EPI_ISL_2777500, EPI_ISL_2777501, EPI_ISL_2777502, EPI_ISL_2777503, EPI_ISL_2777504, EPI_ISL_2777505, EPI_ISL_2777506, EPI_ISL_2777507, EPI_ISL_2777508, EPI_ISL_2777509, EPI_ISL_2777510, EPI_ISL_2777511, EPI_ISL_2777512, EPI_ISL_2777513, EPI_ISL_2777514, EPI_ISL_2777515, EPI_ISL_2777516, EPI_ISL_2777517, EPI_ISL_2777518, EPI_ISL_2777519, EPI_ISL_2777520, EPI_ISL_2777521, EPI_ISL_2777522, EPI_ISL_2777523, EPI_ISL_2777524, EPI_ISL_2777525, EPI_ISL_2777526, EPI_ISL_2777527, EPI_ISL_2777528, EPI_ISL_2777529, EPI_ISL_2777530, EPI_ISL_2777531, EPI_ISL_2777532, EPI_ISL_2777533, EPI_ISL_2777534, EPI_ISL_2777535, EPI_ISL_2777536, EPI_ISL_2777537, EPI_ISL_2777538, EPI_ISL_2777539, EPI_ISL_2777540, EPI_ISL_2777541, EPI_ISL_2777542, EPI_ISL_2777543, EPI_ISL_2777544, EPI_ISL_2777545, EPI_ISL_2777546, EPI_ISL_2777547, EPI_ISL_2777548, EPI_ISL_2777549, EPI_ISL_2777550, EPI_ISL_2777551, EPI_ISL_2777552, EPI_ISL_2777553, EPI_ISL_2777554, EPI_ISL_2777555, EPI_ISL_2777556, EPI_ISL_2777557, EPI_ISL_2777558, EPI_ISL_2777559, EPI_ISL_2777560, EPI_ISL_2777561, EPI_ISL_2777562, EPI_ISL_2777563, EPI_ISL_2777564, EPI_ISL_2777565, EPI_ISL_2777566, EPI_ISL_2777567, EPI_ISL_2777568, EPI_ISL_2777569, EPI_ISL_2777570, EPI_ISL_2777571, EPI_ISL_2777572, EPI_ISL_2777573, EPI_ISL_2777574, EPI_ISL_2777575, EPI_ISL_2777576, EPI_ISL_2777577, EPI_ISL_2777578, EPI_ISL_2777579, EPI_ISL_2777580, EPI_ISL_2777581, EPI_ISL_2777582, EPI_ISL_2777583, EPI_ISL_2777584, EPI_ISL_2777585, EPI_ISL_2777586, EPI_ISL_2777587, EPI_ISL_2777588, EPI_ISL_2777589, EPI_ISL_2777590, EPI_ISL_2777591, EPI_ISL_2777592, EPI_ISL_2777593, EPI_ISL_2777594, EPI_ISL_2777595, EPI_ISL_2777596, EPI_ISL_2777597, EPI_ISL_2777598, EPI_ISL |                                                                                |                                                                                                                                                                                                                                                                                                                                                                |                                                                                                                                                                                                                                                                                                                                                                                                               |

|                                                                                                                                                                                                                                                                                                                                                                                                                                                                                                                                                                                                                                                                                                                                                                                                                                                                                                                                                                                                                                                                                                                                                                                                                                                                                                                                                                                                                                                                                                                                                                                                                                                                                                                                                                                                                                                                                                                                                                                                                                                                                                                                                                                                                                                                                                                                                                                                                                                                                                                                                |                                                                                                   |                                                                                                                                |                                                                                                                                                                                                                                                                                                                                                                                 |
|------------------------------------------------------------------------------------------------------------------------------------------------------------------------------------------------------------------------------------------------------------------------------------------------------------------------------------------------------------------------------------------------------------------------------------------------------------------------------------------------------------------------------------------------------------------------------------------------------------------------------------------------------------------------------------------------------------------------------------------------------------------------------------------------------------------------------------------------------------------------------------------------------------------------------------------------------------------------------------------------------------------------------------------------------------------------------------------------------------------------------------------------------------------------------------------------------------------------------------------------------------------------------------------------------------------------------------------------------------------------------------------------------------------------------------------------------------------------------------------------------------------------------------------------------------------------------------------------------------------------------------------------------------------------------------------------------------------------------------------------------------------------------------------------------------------------------------------------------------------------------------------------------------------------------------------------------------------------------------------------------------------------------------------------------------------------------------------------------------------------------------------------------------------------------------------------------------------------------------------------------------------------------------------------------------------------------------------------------------------------------------------------------------------------------------------------------------------------------------------------------------------------------------------------|---------------------------------------------------------------------------------------------------|--------------------------------------------------------------------------------------------------------------------------------|---------------------------------------------------------------------------------------------------------------------------------------------------------------------------------------------------------------------------------------------------------------------------------------------------------------------------------------------------------------------------------|
| EPI_ISL_2035737, EPI_ISL_2035739, EPI_ISL_2035744, EPI_ISL_2035747, EPI_ISL_2035748, EPI_ISL_2420473                                                                                                                                                                                                                                                                                                                                                                                                                                                                                                                                                                                                                                                                                                                                                                                                                                                                                                                                                                                                                                                                                                                                                                                                                                                                                                                                                                                                                                                                                                                                                                                                                                                                                                                                                                                                                                                                                                                                                                                                                                                                                                                                                                                                                                                                                                                                                                                                                                           |                                                                                                   |                                                                                                                                |                                                                                                                                                                                                                                                                                                                                                                                 |
| see above                                                                                                                                                                                                                                                                                                                                                                                                                                                                                                                                                                                                                                                                                                                                                                                                                                                                                                                                                                                                                                                                                                                                                                                                                                                                                                                                                                                                                                                                                                                                                                                                                                                                                                                                                                                                                                                                                                                                                                                                                                                                                                                                                                                                                                                                                                                                                                                                                                                                                                                                      | San Gallicano Dermatological Institute I.F.O.                                                     | INMI Lazzaro Spallanzani IRCCS                                                                                                 | A Di Caro; B Bartolini; CEM Gruber; E Giombini; E Trento; EG Di Domenico; F Ensoli; F Messina; F Pimpinelli; F Santini; G Bonfiglio; G D'Agosto; G Prignano; M Pontone; M Rueca; MR Capobianchi; O Butera                                                                                                                                                                       |
| EPI_ISL_2691268                                                                                                                                                                                                                                                                                                                                                                                                                                                                                                                                                                                                                                                                                                                                                                                                                                                                                                                                                                                                                                                                                                                                                                                                                                                                                                                                                                                                                                                                                                                                                                                                                                                                                                                                                                                                                                                                                                                                                                                                                                                                                                                                                                                                                                                                                                                                                                                                                                                                                                                                | Santa Clara Valley Medical Center                                                                 | Santa Clara County Public Health Laboratory                                                                                    | Santa Clara County Public Health Department                                                                                                                                                                                                                                                                                                                                     |
| EPI_ISL_2140071                                                                                                                                                                                                                                                                                                                                                                                                                                                                                                                                                                                                                                                                                                                                                                                                                                                                                                                                                                                                                                                                                                                                                                                                                                                                                                                                                                                                                                                                                                                                                                                                                                                                                                                                                                                                                                                                                                                                                                                                                                                                                                                                                                                                                                                                                                                                                                                                                                                                                                                                | Servicio Virosis Respiratorias-Departamento Virologia-INEI                                        | Instituto Nacional Enfermedades Infecciosas C.G.Malbran                                                                        | Avaro M.; Baumeister E.; Benedetti E.; Campos J.; Cisterna D.; Dattero ME; Lorenzo F.; Molina V.; Perandonos C.; Poklepovich T.; Pontoriero A.; Russo M.; Tuduri E.                                                                                                                                                                                                             |
| EPI_ISL_2426646, EPI_ISL_2426647, EPI_ISL_2558004, EPI_ISL_2558005, EPI_ISL_2558006, EPI_ISL_2558042, EPI_ISL_2689692, EPI_ISL_2689695, EPI_ISL_2689730, EPI_ISL_2689734, EPI_ISL_2758576, EPI_ISL_2861038                                                                                                                                                                                                                                                                                                                                                                                                                                                                                                                                                                                                                                                                                                                                                                                                                                                                                                                                                                                                                                                                                                                                                                                                                                                                                                                                                                                                                                                                                                                                                                                                                                                                                                                                                                                                                                                                                                                                                                                                                                                                                                                                                                                                                                                                                                                                     |                                                                                                   |                                                                                                                                |                                                                                                                                                                                                                                                                                                                                                                                 |
| see above                                                                                                                                                                                                                                                                                                                                                                                                                                                                                                                                                                                                                                                                                                                                                                                                                                                                                                                                                                                                                                                                                                                                                                                                                                                                                                                                                                                                                                                                                                                                                                                                                                                                                                                                                                                                                                                                                                                                                                                                                                                                                                                                                                                                                                                                                                                                                                                                                                                                                                                                      | Servicio de Microbiología Hospital Ramon y Cajal                                                  | Servicio de Microbiología Hospital Ramon y Cajal                                                                               | Galan JC; Martinez L. Abreu M; Ponce M.; y Gonzalez-Alba JM                                                                                                                                                                                                                                                                                                                     |
| EPI_ISL_2510580, EPI_ISL_2516722                                                                                                                                                                                                                                                                                                                                                                                                                                                                                                                                                                                                                                                                                                                                                                                                                                                                                                                                                                                                                                                                                                                                                                                                                                                                                                                                                                                                                                                                                                                                                                                                                                                                                                                                                                                                                                                                                                                                                                                                                                                                                                                                                                                                                                                                                                                                                                                                                                                                                                               | Servicio de Microbiología Clínica (Complejo Hospitalario de Navarra, Pamplona)                    | Centro de Secuenciación NASERTIC                                                                                               | Ana Miqueleiz; Ana Navascués; Carmen Ezpeleta Baquedano                                                                                                                                                                                                                                                                                                                         |
| EPI_ISL_2658260                                                                                                                                                                                                                                                                                                                                                                                                                                                                                                                                                                                                                                                                                                                                                                                                                                                                                                                                                                                                                                                                                                                                                                                                                                                                                                                                                                                                                                                                                                                                                                                                                                                                                                                                                                                                                                                                                                                                                                                                                                                                                                                                                                                                                                                                                                                                                                                                                                                                                                                                | Servicio de Microbiología, Consorcio Hospital General Universitario de Valencia                   | SeqCOVID-SPAIN consortium/IBV(CSIC)                                                                                            | Begoña Fuster Escrivá; Carme Salvador García; Concepción Gimeno Cardona and SeqCOVID-SPAIN consortium; María Dolores Ocete; Rafael Medina González                                                                                                                                                                                                                              |
| EPI_ISL_2600916                                                                                                                                                                                                                                                                                                                                                                                                                                                                                                                                                                                                                                                                                                                                                                                                                                                                                                                                                                                                                                                                                                                                                                                                                                                                                                                                                                                                                                                                                                                                                                                                                                                                                                                                                                                                                                                                                                                                                                                                                                                                                                                                                                                                                                                                                                                                                                                                                                                                                                                                | Servicio de Microbiología, Hospital Clínico Universitario de Valencia                             | SeqCOVID-SPAIN consortium/IBV(CSIC)                                                                                            | David Navarro Ortega; Eliseo Albert Vicent; Ignacio Torres and SeqCOVID-SPAIN consortium                                                                                                                                                                                                                                                                                        |
| EPI_ISL_2627516, EPI_ISL_2627521                                                                                                                                                                                                                                                                                                                                                                                                                                                                                                                                                                                                                                                                                                                                                                                                                                                                                                                                                                                                                                                                                                                                                                                                                                                                                                                                                                                                                                                                                                                                                                                                                                                                                                                                                                                                                                                                                                                                                                                                                                                                                                                                                                                                                                                                                                                                                                                                                                                                                                               | Servicio de Microbiología, Hospital Universitario Doctor Peset                                    | SeqCOVID-SPAIN consortium/IBV(CSIC)                                                                                            | José Miguel Nogueira Coito and SeqCOVID-SPAIN consortium; Juan Alberola Enguñados; Juan José Camarena Miñana; Rosa González Pellicer                                                                                                                                                                                                                                            |
| EPI_ISL_2360252, EPI_ISL_2360254                                                                                                                                                                                                                                                                                                                                                                                                                                                                                                                                                                                                                                                                                                                                                                                                                                                                                                                                                                                                                                                                                                                                                                                                                                                                                                                                                                                                                                                                                                                                                                                                                                                                                                                                                                                                                                                                                                                                                                                                                                                                                                                                                                                                                                                                                                                                                                                                                                                                                                               | Shahid Ghodossi Laboratory                                                                        | National Influenza Center                                                                                                      | A Nejadi; F Ajaminejad; F Ajaminejad and T Mokhtari Azad; J Yavarian; K Sadeghi; N Ghavvami; N Ghavvami and T Mokhtari Azad; NZ Shafiei Jandaghi; V Salimi                                                                                                                                                                                                                      |
| EPI_ISL_2545226, EPI_ISL_2545227, EPI_ISL_2545236, EPI_ISL_2545240, EPI_ISL_2545243, EPI_ISL_2545247, EPI_ISL_2545251, EPI_ISL_2545265, EPI_ISL_2545267, EPI_ISL_2545270, EPI_ISL_2545276, EPI_ISL_2545277, EPI_ISL_2545292, EPI_ISL_2545295, EPI_ISL_2545296, EPI_ISL_2545297, EPI_ISL_2545299, EPI_ISL_2545302, EPI_ISL_2545303, EPI_ISL_2567007, EPI_ISL_2567021, EPI_ISL_2567040, EPI_ISL_2567042, EPI_ISL_2567071, EPI_ISL_2811423, EPI_ISL_2811429, EPI_ISL_2811449, EPI_ISL_2811452, EPI_ISL_2811456, EPI_ISL_2811459, EPI_ISL_2811467, EPI_ISL_2811471, EPI_ISL_2811473, EPI_ISL_2811487, EPI_ISL_2811493, EPI_ISL_2811504, EPI_ISL_2811535, EPI_ISL_2811565, EPI_ISL_2811577, EPI_ISL_2811579, EPI_ISL_2811600, EPI_ISL_2811610, EPI_ISL_2811642, EPI_ISL_2811664, EPI_ISL_2811678, EPI_ISL_2811690, EPI_ISL_2811712, EPI_ISL_2834268, EPI_ISL_2834270, EPI_ISL_2834272, EPI_ISL_2834274, EPI_ISL_2834276, EPI_ISL_2834278, EPI_ISL_2834280, EPI_ISL_2834282, EPI_ISL_2834284, EPI_ISL_2834285, EPI_ISL_2834288, EPI_ISL_2834289, EPI_ISL_2834309, EPI_ISL_2834311, EPI_ISL_2834314, EPI_ISL_2834316, EPI_ISL_2834322, EPI_ISL_2834326, EPI_ISL_2834332, EPI_ISL_2834334, EPI_ISL_2834337, EPI_ISL_2834339, EPI_ISL_2834344, EPI_ISL_2834345, EPI_ISL_2834346, EPI_ISL_2834350, EPI_ISL_2834352, EPI_ISL_2834353, EPI_ISL_2834384, EPI_ISL_2834387, EPI_ISL_2834392, EPI_ISL_2834393, EPI_ISL_2834400, EPI_ISL_2834407, EPI_ISL_2834408, EPI_ISL_2834414, EPI_ISL_2834416, EPI_ISL_2834423, EPI_ISL_2834426, EPI_ISL_2834428, EPI_ISL_2834437, EPI_ISL_2834438, EPI_ISL_2834439, EPI_ISL_2834447, EPI_ISL_2834449, EPI_ISL_2834450, EPI_ISL_2834458, EPI_ISL_2834470, EPI_ISL_2834474, EPI_ISL_2834482, EPI_ISL_2834489, EPI_ISL_2834493, EPI_ISL_2834494, EPI_ISL_2834496, EPI_ISL_2834500, EPI_ISL_2834511, EPI_ISL_2834517, EPI_ISL_2834519, EPI_ISL_2834522, EPI_ISL_2834524                                                                                                                                                                                                                                                                                                                                                                                                                                                                                                                                                                                                                                                      |                                                                                                   |                                                                                                                                |                                                                                                                                                                                                                                                                                                                                                                                 |
| see above                                                                                                                                                                                                                                                                                                                                                                                                                                                                                                                                                                                                                                                                                                                                                                                                                                                                                                                                                                                                                                                                                                                                                                                                                                                                                                                                                                                                                                                                                                                                                                                                                                                                                                                                                                                                                                                                                                                                                                                                                                                                                                                                                                                                                                                                                                                                                                                                                                                                                                                                      | Shamir Medical Center (Asaf Harofe)                                                               | Shamir Medical Center (Asaf Harofe)                                                                                            | Abu Hamad Ramzia; Adina Bar Chaim; Anna Vishnevsky; Chen Weiner; Netta Zuckerman; Nir Rainy; Patricia Benveniste-Lekovitz; Reut Sorek Abramovich; Yevgeni Yegorov                                                                                                                                                                                                               |
| EPI_ISL_2608422, EPI_ISL_2608423                                                                                                                                                                                                                                                                                                                                                                                                                                                                                                                                                                                                                                                                                                                                                                                                                                                                                                                                                                                                                                                                                                                                                                                                                                                                                                                                                                                                                                                                                                                                                                                                                                                                                                                                                                                                                                                                                                                                                                                                                                                                                                                                                                                                                                                                                                                                                                                                                                                                                                               | Siem Reap Provincial Laboratory                                                                   | Virology Unit, Institut Pasteur du Cambodge                                                                                    | Cecile Troupin; Chau Darapehak; Chin Savuth; Erik A Karlsson; Jurre Y Siegers; Kraing Sidonn; Leakhena Pum; Ly Sovann; Veasna Duong; Yi Sengdoeum                                                                                                                                                                                                                               |
| EPI_ISL_2566445                                                                                                                                                                                                                                                                                                                                                                                                                                                                                                                                                                                                                                                                                                                                                                                                                                                                                                                                                                                                                                                                                                                                                                                                                                                                                                                                                                                                                                                                                                                                                                                                                                                                                                                                                                                                                                                                                                                                                                                                                                                                                                                                                                                                                                                                                                                                                                                                                                                                                                                                | Singapore General Hospital                                                                        | Department of Microbiology                                                                                                     | Chayaporn Suphavilai; James Sim Heng Chiak; Karrie Ko; Kenneth Xin Long Chan; Kern Rei Chng; Kian Sing Chan; Kun Lee Lim; Lynette Oon; Niranjan Nagarajan; Nurdyana Abdul Rahman; Sui Sin Goh                                                                                                                                                                                   |
| EPI_ISL_2816202, EPI_ISL_2816206, EPI_ISL_2816211                                                                                                                                                                                                                                                                                                                                                                                                                                                                                                                                                                                                                                                                                                                                                                                                                                                                                                                                                                                                                                                                                                                                                                                                                                                                                                                                                                                                                                                                                                                                                                                                                                                                                                                                                                                                                                                                                                                                                                                                                                                                                                                                                                                                                                                                                                                                                                                                                                                                                              | Skiflovskoy Research Institute of Emergency Medicine                                              | WHO National Influenza Centre Russian Federation                                                                               | Andrey Komissarov; Artem Fadeev; Daria Danilenko; Dmitry Lioznov; Elena Nabieva; Georgij Bazynkin; Kirill Varchenko; Ksenia Safina; Kseniya Komissarova; Maria Pisareva; Mikhail Bakaev; Nikita Yolshin; Oula Mansour; Tamila Musaeva; Veronika Eder                                                                                                                            |
| EPI_ISL_2761446, EPI_ISL_2762059                                                                                                                                                                                                                                                                                                                                                                                                                                                                                                                                                                                                                                                                                                                                                                                                                                                                                                                                                                                                                                                                                                                                                                                                                                                                                                                                                                                                                                                                                                                                                                                                                                                                                                                                                                                                                                                                                                                                                                                                                                                                                                                                                                                                                                                                                                                                                                                                                                                                                                               | Sonic - Labor Staber Nürnberg                                                                     | Robert Koch Institute                                                                                                          |                                                                                                                                                                                                                                                                                                                                                                                 |
| EPI_ISL_2260735, EPI_ISL_2260774, EPI_ISL_2388738, EPI_ISL_2762002                                                                                                                                                                                                                                                                                                                                                                                                                                                                                                                                                                                                                                                                                                                                                                                                                                                                                                                                                                                                                                                                                                                                                                                                                                                                                                                                                                                                                                                                                                                                                                                                                                                                                                                                                                                                                                                                                                                                                                                                                                                                                                                                                                                                                                                                                                                                                                                                                                                                             | Sonic - MVZ Medizinisches Labor Bremen GmbH                                                       | Robert Koch Institute                                                                                                          |                                                                                                                                                                                                                                                                                                                                                                                 |
| EPI_ISL_1904449, EPI_ISL_1904454, EPI_ISL_1904457, EPI_ISL_1904459, EPI_ISL_1904460, EPI_ISL_1904462, EPI_ISL_1904463, EPI_ISL_1904464, EPI_ISL_1904465, EPI_ISL_1904466, EPI_ISL_1904468, EPI_ISL_1904469, EPI_ISL_1904470, EPI_ISL_2405109, EPI_ISL_2405110, EPI_ISL_2405113, EPI_ISL_2405117, EPI_ISL_2462434, EPI_ISL_2650455, EPI_ISL_2650460, EPI_ISL_2828017                                                                                                                                                                                                                                                                                                                                                                                                                                                                                                                                                                                                                                                                                                                                                                                                                                                                                                                                                                                                                                                                                                                                                                                                                                                                                                                                                                                                                                                                                                                                                                                                                                                                                                                                                                                                                                                                                                                                                                                                                                                                                                                                                                            |                                                                                                   |                                                                                                                                |                                                                                                                                                                                                                                                                                                                                                                                 |
| see above                                                                                                                                                                                                                                                                                                                                                                                                                                                                                                                                                                                                                                                                                                                                                                                                                                                                                                                                                                                                                                                                                                                                                                                                                                                                                                                                                                                                                                                                                                                                                                                                                                                                                                                                                                                                                                                                                                                                                                                                                                                                                                                                                                                                                                                                                                                                                                                                                                                                                                                                      | South Eastern Area Laboratory Services (SEALS)                                                    | NSW Health Pathology - Institute of Clinical Pathology and Medical Research; Westmead Hospital; University of Sydney           | CIDM-PH et al.                                                                                                                                                                                                                                                                                                                                                                  |
| EPI_ISL_2833681                                                                                                                                                                                                                                                                                                                                                                                                                                                                                                                                                                                                                                                                                                                                                                                                                                                                                                                                                                                                                                                                                                                                                                                                                                                                                                                                                                                                                                                                                                                                                                                                                                                                                                                                                                                                                                                                                                                                                                                                                                                                                                                                                                                                                                                                                                                                                                                                                                                                                                                                | Spital Limmattal                                                                                  | Institute of Medical Virology                                                                                                  | Alexandra Trkola; Annette Audigé; Cyril Shah; Gabriela Ziltener; Guido Bloemberg; Jon Huder; Jürg Böni; Kevin Steiner; Maria Grünberg; Maryam Zaheri; Michael Huber; Riccarda Capaul; Stefan Schmutz; Verena Kufner                                                                                                                                                             |
| EPI_ISL_2833683, EPI_ISL_2833684, EPI_ISL_2858697                                                                                                                                                                                                                                                                                                                                                                                                                                                                                                                                                                                                                                                                                                                                                                                                                                                                                                                                                                                                                                                                                                                                                                                                                                                                                                                                                                                                                                                                                                                                                                                                                                                                                                                                                                                                                                                                                                                                                                                                                                                                                                                                                                                                                                                                                                                                                                                                                                                                                              | Spital Männedorf AG                                                                               | Institute of Medical Virology                                                                                                  | Alexandra Trkola; Annette Audigé; Cyril Shah; Gabriela Ziltener; Guido Bloemberg; Jon Huder; Jürg Böni; Kevin Steiner; Maria Grünberg; Maryam Zaheri; Michael Huber; Riccarda Capaul; Stefan Schmutz; Verena Kufner                                                                                                                                                             |
| EPI_ISL_2510859                                                                                                                                                                                                                                                                                                                                                                                                                                                                                                                                                                                                                                                                                                                                                                                                                                                                                                                                                                                                                                                                                                                                                                                                                                                                                                                                                                                                                                                                                                                                                                                                                                                                                                                                                                                                                                                                                                                                                                                                                                                                                                                                                                                                                                                                                                                                                                                                                                                                                                                                | Spital Mšnnedorf AG                                                                               | Institute of Medical Virology                                                                                                  | Alexandra Trkola; Annette Audigé; Catharine Aquino; Cyril Shah; Daniel Ehrsam; Gabriela Ziltener; Guido Bloemberg; Hubert Rehrauer; Isabel Střrmer; Joel Wirz; Jon Huder; Jřrg Bšni; Kevin Steiner; Maria Grřnberg; Maryam Zaheri; Michael Huber; Riccarda Capaul; Stefan Schmutz; Verena Kufner; Weihong Qi                                                                    |
| EPI_ISL_2362528, EPI_ISL_2362530, EPI_ISL_2834141, EPI_ISL_2861376                                                                                                                                                                                                                                                                                                                                                                                                                                                                                                                                                                                                                                                                                                                                                                                                                                                                                                                                                                                                                                                                                                                                                                                                                                                                                                                                                                                                                                                                                                                                                                                                                                                                                                                                                                                                                                                                                                                                                                                                                                                                                                                                                                                                                                                                                                                                                                                                                                                                             | St James's Hospital, Dublin 8, Ireland.                                                           | ELDA biotech                                                                                                                   | Brendan Crowley; Deirdre M. Broderick; Peter R. Flanagan                                                                                                                                                                                                                                                                                                                        |
| EPI_ISL_2876015, EPI_ISL_2876016, EPI_ISL_2876025, EPI_ISL_2876041                                                                                                                                                                                                                                                                                                                                                                                                                                                                                                                                                                                                                                                                                                                                                                                                                                                                                                                                                                                                                                                                                                                                                                                                                                                                                                                                                                                                                                                                                                                                                                                                                                                                                                                                                                                                                                                                                                                                                                                                                                                                                                                                                                                                                                                                                                                                                                                                                                                                             | St Vincent's Pathology (SydPath)                                                                  | NSW Health Pathology - Institute of Clinical Pathology and Medical Research; Westmead Hospital; University of Sydney           | CIDM-PH et al.                                                                                                                                                                                                                                                                                                                                                                  |
| EPI_ISL_2360241, EPI_ISL_2833694                                                                                                                                                                                                                                                                                                                                                                                                                                                                                                                                                                                                                                                                                                                                                                                                                                                                                                                                                                                                                                                                                                                                                                                                                                                                                                                                                                                                                                                                                                                                                                                                                                                                                                                                                                                                                                                                                                                                                                                                                                                                                                                                                                                                                                                                                                                                                                                                                                                                                                               | Stadtsptital Triemli                                                                              | Institute of Medical Virology                                                                                                  | Alexandra Trkola; Annette Audigé; Cyril Shah; Gabriela Ziltener; Guido Bloemberg; Jon Huder; Jürg Böni; Kevin Steiner; Maria Grünberg; Maryam Zaheri; Michael Huber; Riccarda Capaul; Stefan Schmutz; Verena Kufner                                                                                                                                                             |
| EPI_ISL_2377955, EPI_ISL_2800635                                                                                                                                                                                                                                                                                                                                                                                                                                                                                                                                                                                                                                                                                                                                                                                                                                                                                                                                                                                                                                                                                                                                                                                                                                                                                                                                                                                                                                                                                                                                                                                                                                                                                                                                                                                                                                                                                                                                                                                                                                                                                                                                                                                                                                                                                                                                                                                                                                                                                                               | State Testing Facility                                                                            | Altius Institute for Biomedical Research                                                                                       | Alex Isner; Alex Nguyen; Amanda Gale; Audra Johnson; Clem Green; Daniel Bates; Eric Thorland; Jacob Rodriguez; Jean Robinson; Jerema Nelson; Jessica Kunder; John Stamatoyannopoulos; Joshua Richards; Julia Wald; Kneshay Harper; Lauren Mitchell; Mark Frerker; Matt Hartman; Michael Buckley; Muhammad Halimoun; Rebecca Bruders; Sadie Patraw; Sofia Olsson; Tobias Ragoczy |
| EPI_ISL_1914584                                                                                                                                                                                                                                                                                                                                                                                                                                                                                                                                                                                                                                                                                                                                                                                                                                                                                                                                                                                                                                                                                                                                                                                                                                                                                                                                                                                                                                                                                                                                                                                                                                                                                                                                                                                                                                                                                                                                                                                                                                                                                                                                                                                                                                                                                                                                                                                                                                                                                                                                | State Virus Research and Diagnostic Laboratory (VRDL), AIIMS Raipur                               | State Virus Research and Diagnostic Laboratory (VRDL), AIIMS Raipur                                                            | Anudita Bhargava; Kuldeep Sharma; Priyanka Singh; Pushpendra Singh; Sanjay Singh Negi; Sonya Sharma                                                                                                                                                                                                                                                                             |
| EPI_ISL_2684247, EPI_ISL_2684307, EPI_ISL_2684814, EPI_ISL_2684859, EPI_ISL_2685126, EPI_ISL_2685164, EPI_ISL_2685428, EPI_ISL_2685473, EPI_ISL_2685521, EPI_ISL_2685602, EPI_ISL_2685763                                                                                                                                                                                                                                                                                                                                                                                                                                                                                                                                                                                                                                                                                                                                                                                                                                                                                                                                                                                                                                                                                                                                                                                                                                                                                                                                                                                                                                                                                                                                                                                                                                                                                                                                                                                                                                                                                                                                                                                                                                                                                                                                                                                                                                                                                                                                                      |                                                                                                   |                                                                                                                                |                                                                                                                                                                                                                                                                                                                                                                                 |
| see above                                                                                                                                                                                                                                                                                                                                                                                                                                                                                                                                                                                                                                                                                                                                                                                                                                                                                                                                                                                                                                                                                                                                                                                                                                                                                                                                                                                                                                                                                                                                                                                                                                                                                                                                                                                                                                                                                                                                                                                                                                                                                                                                                                                                                                                                                                                                                                                                                                                                                                                                      | Statens Serum Institut Bioinformatics and Microbial Genomics                                      | Statens Serum Institut Bioinformatics and Microbial Genomics                                                                   | Danish Covid-19 Genome Consortium                                                                                                                                                                                                                                                                                                                                               |
| EPI_ISL_2678466                                                                                                                                                                                                                                                                                                                                                                                                                                                                                                                                                                                                                                                                                                                                                                                                                                                                                                                                                                                                                                                                                                                                                                                                                                                                                                                                                                                                                                                                                                                                                                                                                                                                                                                                                                                                                                                                                                                                                                                                                                                                                                                                                                                                                                                                                                                                                                                                                                                                                                                                | Städtisches Klinikum Dresden Institut für Klinische Chemie und Laboratoriumsmedizin               | Robert Koch Institute                                                                                                          |                                                                                                                                                                                                                                                                                                                                                                                 |
| EPI_ISL_2812706                                                                                                                                                                                                                                                                                                                                                                                                                                                                                                                                                                                                                                                                                                                                                                                                                                                                                                                                                                                                                                                                                                                                                                                                                                                                                                                                                                                                                                                                                                                                                                                                                                                                                                                                                                                                                                                                                                                                                                                                                                                                                                                                                                                                                                                                                                                                                                                                                                                                                                                                | Sultan Haji Ahmad Shah Hospital                                                                   | Institute for Medical Research, Infectious Disease Research Centre, National Institutes of Health, Ministry of Health Malaysia | Azizan MA; Kamel K; Mohd Zawawi Z; Ramly N; Robert F; Suppiah J; Thayan R                                                                                                                                                                                                                                                                                                       |
| EPI_ISL_2091024                                                                                                                                                                                                                                                                                                                                                                                                                                                                                                                                                                                                                                                                                                                                                                                                                                                                                                                                                                                                                                                                                                                                                                                                                                                                                                                                                                                                                                                                                                                                                                                                                                                                                                                                                                                                                                                                                                                                                                                                                                                                                                                                                                                                                                                                                                                                                                                                                                                                                                                                | Sultanah Aminah Hospital, Johor Bahru                                                             | Institute for Medical Research, Infectious Disease Research Centre, National Institutes of Health, Ministry of Health Malaysia | Azizan MA; Kamel K; Mohd Zawawi Z; Ramly N; Robert F; Suppiah J; Thayan R                                                                                                                                                                                                                                                                                                       |
| EPI_ISL_1972356, EPI_ISL_2091020                                                                                                                                                                                                                                                                                                                                                                                                                                                                                                                                                                                                                                                                                                                                                                                                                                                                                                                                                                                                                                                                                                                                                                                                                                                                                                                                                                                                                                                                                                                                                                                                                                                                                                                                                                                                                                                                                                                                                                                                                                                                                                                                                                                                                                                                                                                                                                                                                                                                                                               | Sungai Buloh Hospital                                                                             | Institute for Medical Research, Infectious Disease Research Centre, National Institutes of Health, Ministry of Health Malaysia | Azizan MA; Kamel K; Mohd Zawawi Z; Ramly N; Robert F; Suppiah J; Thayan R                                                                                                                                                                                                                                                                                                       |
| EPI_ISL_2510687, EPI_ISL_2570808, EPI_ISL_2570809, EPI_ISL_2570811, EPI_ISL_2617435, EPI_ISL_2617436, EPI_ISL_2617437, EPI_ISL_2693670                                                                                                                                                                                                                                                                                                                                                                                                                                                                                                                                                                                                                                                                                                                                                                                                                                                                                                                                                                                                                                                                                                                                                                                                                                                                                                                                                                                                                                                                                                                                                                                                                                                                                                                                                                                                                                                                                                                                                                                                                                                                                                                                                                                                                                                                                                                                                                                                         |                                                                                                   |                                                                                                                                |                                                                                                                                                                                                                                                                                                                                                                                 |
| see above                                                                                                                                                                                                                                                                                                                                                                                                                                                                                                                                                                                                                                                                                                                                                                                                                                                                                                                                                                                                                                                                                                                                                                                                                                                                                                                                                                                                                                                                                                                                                                                                                                                                                                                                                                                                                                                                                                                                                                                                                                                                                                                                                                                                                                                                                                                                                                                                                                                                                                                                      | Surabaya Health Office                                                                            | Institute of Tropical Disease, Universitas Airlangga                                                                           | Aldise M Nastri; Febria Rachmanita; Gatot Soegiarto; Herlin Ferliana; Jezy R Dewantari; Kazufumi Shimizu; Krisnoadi Rahardjo; Laksmi Wulandari; Maria I Lusida; Resti Yudhawati; Rima R Prasetya; Soetjipto; Yasuko Mori                                                                                                                                                        |
| EPI_ISL_1808683, EPI_ISL_1808686, EPI_ISL_1899297, EPI_ISL_2032727, EPI_ISL_2033405, EPI_ISL_2033751, EPI_ISL_2034582, EPI_ISL_2034589, EPI_ISL_2205865, EPI_ISL_2209223, EPI_ISL_2257706, EPI_ISL_2414357, EPI_ISL_2414459, EPI_ISL_2414464, EPI_ISL_2414793, EPI_ISL_2415198, EPI_ISL_2415482, EPI_ISL_2415484, EPI_ISL_2415611, EPI_ISL_2416022, EPI_ISL_2416025, EPI_ISL_2418112, EPI_ISL_2418223, EPI_ISL_2418250, EPI_ISL_2418275, EPI_ISL_2418290, EPI_ISL_2418297, EPI_ISL_2418305, EPI_ISL_2418315, EPI_ISL_2418322, EPI_ISL_2418328, EPI_ISL_2418647, EPI_ISL_2584419, EPI_ISL_2584480, EPI_ISL_2613548, EPI_ISL_2613550, EPI_ISL_2613551, EPI_ISL_2615371, EPI_ISL_2618839, EPI_ISL_2618844, EPI_ISL_2618847, EPI_ISL_2618883, EPI_ISL_2618891, EPI_ISL_2618893, EPI_ISL_2618971, EPI_ISL_2618972, EPI_ISL_2618974, EPI_ISL_2618976, EPI_ISL_2618980, EPI_ISL_2618994, EPI_ISL_2619174, EPI_ISL_2619176, EPI_ISL_2619177, EPI_ISL_2619178, EPI_ISL_2619266, EPI_ISL_2619267, EPI_ISL_2619550, EPI_ISL_2619555, EPI_ISL_2619559, EPI_ISL_2619571, EPI_ISL_2619588, EPI_ISL_2619595, EPI_ISL_2619619, EPI_ISL_2619625, EPI_ISL_2619626, EPI_ISL_2619630, EPI_ISL_2619631, EPI_ISL_2619632, EPI_ISL_2619644, EPI_ISL_2619703, EPI_ISL_2792631, EPI_ISL_2792665, EPI_ISL_2792676, EPI_ISL_2792861, EPI_ISL_2792888, EPI_ISL_2793073, EPI_ISL_2793127, EPI_ISL_2793135, EPI_ISL_2793136, EPI_ISL_2793157, EPI_ISL_2793203, EPI_ISL_2793275, EPI_ISL_2793280, EPI_ISL_2793433, EPI_ISL_2793440, EPI_ISL_2793443, EPI_ISL_2793445, EPI_ISL_2793446, EPI_ISL_2793449, EPI_ISL_2793452, EPI_ISL_2793454, EPI_ISL_2793457, EPI_ISL_2793469, EPI_ISL_2793479, EPI_ISL_2793485, EPI_ISL_2793496, EPI_ISL_2793499, EPI_ISL_2793544, EPI_ISL_2793624, EPI_ISL_2793709, EPI_ISL_2793742, EPI_ISL_2793807, EPI_ISL_2793875, EPI_ISL_2793887, EPI_ISL_2793892, EPI_ISL_2793986, EPI_ISL_2793992, EPI_ISL_2794006, EPI_ISL_2794008, EPI_ISL_2794087, EPI_ISL_2794267, EPI_ISL_2794959, EPI_ISL_2795205, EPI_ISL_2795215, EPI_ISL_2795249, EPI_ISL_2795261, EPI_ISL_2795359, EPI_ISL_2795364, EPI_ISL_2795370, EPI_ISL_2795399, EPI_ISL_2795400, EPI_ISL_2795405, EPI_ISL_2795409, EPI_ISL_2795440, EPI_ISL_2795447, EPI_ISL_2795459, EPI_ISL_2795512, EPI_ISL_2795581, EPI_ISL_2795601, EPI_ISL_2820812, EPI_ISL_2888082, EPI_ISL_2888102, EPI_ISL_2888141, EPI_ISL_2888163, EPI_ISL_2888175, EPI_ISL_2888176, EPI_ISL_2888179, EPI_ISL_2888185, EPI_ISL_2888197, EPI_ISL_2888509, EPI_ISL_2888585, EPI_ISL_2888722, EPI_ISL_2888773, EPI_ISL_2888778 |                                                                                                   |                                                                                                                                |                                                                                                                                                                                                                                                                                                                                                                                 |
| see above                                                                                                                                                                                                                                                                                                                                                                                                                                                                                                                                                                                                                                                                                                                                                                                                                                                                                                                                                                                                                                                                                                                                                                                                                                                                                                                                                                                                                                                                                                                                                                                                                                                                                                                                                                                                                                                                                                                                                                                                                                                                                                                                                                                                                                                                                                                                                                                                                                                                                                                                      | Swedish national genomic surveillance program of SARS-CoV-2                                       | The Public Health Agency of Sweden                                                                                             | Alma Brolund; Maria Lind Karlberg; Maximilian Riess; Swedish national genomic surveillance program of SARS-CoV-2                                                                                                                                                                                                                                                                |
| EPI_ISL_1969243                                                                                                                                                                                                                                                                                                                                                                                                                                                                                                                                                                                                                                                                                                                                                                                                                                                                                                                                                                                                                                                                                                                                                                                                                                                                                                                                                                                                                                                                                                                                                                                                                                                                                                                                                                                                                                                                                                                                                                                                                                                                                                                                                                                                                                                                                                                                                                                                                                                                                                                                | Swissbel Hotel Airport                                                                            | National Institute of Health Research and Development                                                                          | Arie Ardiansyah Nugraha; Hana Apsari Pawestri; Hartanti Dian Ikawati; Kartika Dewi Puspa; Krisna Pangesti; Nelly Puspandari; Subangkit; Triyani Soekarso; Viro Setiawaty                                                                                                                                                                                                        |
| EPI_ISL_2876044                                                                                                                                                                                                                                                                                                                                                                                                                                                                                                                                                                                                                                                                                                                                                                                                                                                                                                                                                                                                                                                                                                                                                                                                                                                                                                                                                                                                                                                                                                                                                                                                                                                                                                                                                                                                                                                                                                                                                                                                                                                                                                                                                                                                                                                                                                                                                                                                                                                                                                                                | Sydney South West Pathology Service (SSWPS) - Liverpool Hospital - NSW Health Pathology           | NSW Health Pathology - Institute of Clinical Pathology and Medical Research; Westmead Hospital; University of Sydney           | CIDM-PH et al.                                                                                                                                                                                                                                                                                                                                                                  |
| EPI_ISL_2405111, EPI_ISL_2405112, EPI_ISL_2462421, EPI_ISL_2650469                                                                                                                                                                                                                                                                                                                                                                                                                                                                                                                                                                                                                                                                                                                                                                                                                                                                                                                                                                                                                                                                                                                                                                                                                                                                                                                                                                                                                                                                                                                                                                                                                                                                                                                                                                                                                                                                                                                                                                                                                                                                                                                                                                                                                                                                                                                                                                                                                                                                             | Sydney South West Pathology Service (SSWPS) - Royal Prince Alfred Hospital - NSW Health Pathology | NSW Health Pathology - Institute of Clinical Pathology and Medical Research; Westmead Hospital; University of Sydney           | CIDM-PH et al.                                                                                                                                                                                                                                                                                                                                                                  |
| EPI_ISL_2248985, EPI_ISL_2249005, EPI_ISL_2249015                                                                                                                                                                                                                                                                                                                                                                                                                                                                                                                                                                                                                                                                                                                                                                                                                                                                                                                                                                                                                                                                                                                                                                                                                                                                                                                                                                                                                                                                                                                                                                                                                                                                                                                                                                                                                                                                                                                                                                                                                                                                                                                                                                                                                                                                                                                                                                                                                                                                                              | Synlab                                                                                            | Instituto Nacional de Saude (INSA)                                                                                             | Borges et al                                                                                                                                                                                                                                                                                                                                                                    |
| EPI_ISL_2267288                                                                                                                                                                                                                                                                                                                                                                                                                                                                                                                                                                                                                                                                                                                                                                                                                                                                                                                                                                                                                                                                                                                                                                                                                                                                                                                                                                                                                                                                                                                                                                                                                                                                                                                                                                                                                                                                                                                                                                                                                                                                                                                                                                                                                                                                                                                                                                                                                                                                                                                                | Synlab MVZ Augsburg                                                                               | Robert Koch Institute                                                                                                          |                                                                                                                                                                                                                                                                                                                                                                                 |
| EPI_ISL_2611028, EPI_ISL_2768092                                                                                                                                                                                                                                                                                                                                                                                                                                                                                                                                                                                                                                                                                                                                                                                                                                                                                                                                                                                                                                                                                                                                                                                                                                                                                                                                                                                                                                                                                                                                                                                                                                                                                                                                                                                                                                                                                                                                                                                                                                                                                                                                                                                                                                                                                                                                                                                                                                                                                                               | Synlab Suisse SA                                                                                  | Clinical Bacteriology                                                                                                          | Adrian Egli; Alfredo Mari; Fanny Wegner; Hans Hirsch; Helena MB Seth-Smith; Julia Bielicki; Karoline Leuzinger; Manuel Battegay; Tim Roloff                                                                                                                                                                                                                                     |

|                                                                                                                                                                                                                                                                                                                                                                                                                                         |                                                                                               |                                                                                                                                                                                                                                |                                                                                                                                                                                                                                                                                                                                                                                                                                                                                           |
|-----------------------------------------------------------------------------------------------------------------------------------------------------------------------------------------------------------------------------------------------------------------------------------------------------------------------------------------------------------------------------------------------------------------------------------------|-----------------------------------------------------------------------------------------------|--------------------------------------------------------------------------------------------------------------------------------------------------------------------------------------------------------------------------------|-------------------------------------------------------------------------------------------------------------------------------------------------------------------------------------------------------------------------------------------------------------------------------------------------------------------------------------------------------------------------------------------------------------------------------------------------------------------------------------------|
| EPI_ISL_2423549,<br>EPI_ISL_2443304                                                                                                                                                                                                                                                                                                                                                                                                     | TXDSHS                                                                                        | TXDSHS                                                                                                                                                                                                                         | Anita Pokharel; Bonnie Oh; Chun Wang; Grace Kubin; Jenny Zhang; Karen Bobier; Lorraine Rodriguez; Maliha Rahman; Mayela Pedrueza; Myong Koag; Rachel Lee; Rashmi Tuladhar                                                                                                                                                                                                                                                                                                                 |
| EPI_ISL_2363996,<br>EPI_ISL_2363998,<br>EPI_ISL_2364003,<br>EPI_ISL_2364004,<br>EPI_ISL_2644978,<br>EPI_ISL_2644988                                                                                                                                                                                                                                                                                                                     | TYKS, Kiilinen mikrobiologia                                                                  | Expert Microbiology, National Institute for Health and Welfare                                                                                                                                                                 | Carita Savolainen-Kopra; Erika Lindh; Haider al-Hello; Jani Halkilahti; Kirsi Liitsola; Niina Ikonen; Olli Vapalahti; Pekka Ellonen; Phuoc Truong; Päivi Laurila; Ravi Kant; Sari Hannula; Soile Blomqvist; Teemu Smura                                                                                                                                                                                                                                                                   |
| EPI_ISL_2081386, EPI_ISL_2800908, EPI_ISL_2800910, EPI_ISL_2800911, EPI_ISL_2800912, EPI_ISL_2833815, EPI_ISL_2833913                                                                                                                                                                                                                                                                                                                   |                                                                                               |                                                                                                                                                                                                                                |                                                                                                                                                                                                                                                                                                                                                                                                                                                                                           |
| see above                                                                                                                                                                                                                                                                                                                                                                                                                               | Tampa General Hospital Esoteric Lab                                                           | Tampa General Hospital Esoteric Research & Development Lab                                                                                                                                                                     | Amorce Lima; Deanna Becker; Dominic Uy; Elaine Vendrone; Grant Vestal; Jon Faughn; Jorge Mecias-Frias; Suzane Silbert; Vicki Healer                                                                                                                                                                                                                                                                                                                                                       |
| EPI_ISL_2501034,<br>EPI_ISL_2501035,<br>EPI_ISL_2801904,<br>EPI_ISL_2801905,<br>EPI_ISL_2801906                                                                                                                                                                                                                                                                                                                                         | Tboung Khmum Rapid Response Team                                                              | Virology Unit, Institut Pasteur du Cambodge                                                                                                                                                                                    | Cecile Troupin; Chau Darapeak; Chin Savuth; Erik A Karlsson; Jurre Y Siegers; Kraing Sidonn; Leakhena Pum; Ly Sovann; Veasna Duong; Yi Sengdoeum                                                                                                                                                                                                                                                                                                                                          |
| EPI_ISL_1838134                                                                                                                                                                                                                                                                                                                                                                                                                         | The National Centre for Cell Science                                                          | CSIR-Centre for Cellular and Molecular Biology-INSACOG                                                                                                                                                                         | Ajay Pillai; Amareshwar Vodapalli; Ara Sreenivas; Archana Bharadwaj Silva; B Himasri; Blessy B John; Dhiraj Paul; Divya Tej Sowpati; INSACOG Consortium team; Karthik Bharadwaj Tallapaka; Lamuk Zaveri; Manoj Kumar Bhat; Mitali Inamdar; Mohak P Gujar; Onkar Kulkarni; Payel Mukherjee; Rakesh K Mishra; Sharath Chandra Thota; Shivang P. Bhanushali; Shreekanth Verma; Sofia Banu; Sonal Manik Chavan; Tulasi Nagabandi; Valli Nagalakshmi Undamatla; Viswagithe S L; Yogesh Shouche |
| EPI_ISL_2551582<br>EPI_ISL_2562788                                                                                                                                                                                                                                                                                                                                                                                                      | Tochigi Prefectural Institute of Environment and Health<br>TriCore Reference Laboratories     | Genome Analysis Center, Kamma Memorial Hospital<br>Center for Global Health, University of New Mexico Health Sciences Center                                                                                                   | Fuminori Mizukoshi; Hanako Yazawa; Hiroshi Kamma; Jun Ishii; Kaori Watanabe; Michiaki Masuda; Satoko Soma; Takuya Yazawa; Yoshiko Hitomi<br>Cecilia Thompson; Darrell Dinwiddie; Daryl Domman; Karissa Culbreath; Kendra Pesko; Kurt Schwalm; Valerie Morley                                                                                                                                                                                                                              |
| EPI_ISL_2649992                                                                                                                                                                                                                                                                                                                                                                                                                         | Tuanku Ampuan Najihah Hospital, Kuala Pilah                                                   | Institute for Medical Research, Infectious Disease Research Centre, National Institutes of Health, Ministry of Health Malaysia                                                                                                 | Azizan MA; Kamel K; Mohd Zawawi Z; Ramly N; Robert F; Suppiah J; Thayan R                                                                                                                                                                                                                                                                                                                                                                                                                 |
| EPI_ISL_2878097,<br>EPI_ISL_2878104                                                                                                                                                                                                                                                                                                                                                                                                     | UAB Diagnostikos laboratorija                                                                 | National Public Health Surveillance Laboratory                                                                                                                                                                                 | Ana Steponkiene; Danas Baksa; Jelena Razmuk; Lukas Vasionis; Lukas Zemaitis; Migle Gabrielaite; Svajune Muralyte                                                                                                                                                                                                                                                                                                                                                                          |
| EPI_ISL_2694582,<br>EPI_ISL_2694583,<br>EPI_ISL_2694584                                                                                                                                                                                                                                                                                                                                                                                 | UAB InMedica                                                                                  | National Public Health Surveillance Laboratory                                                                                                                                                                                 | Ana Steponkiene; Danas Baksa; Jelena Razmuk; Lukas Vasionis; Lukas Zemaitis; Migle Gabrielaite; Svajune Muralyte                                                                                                                                                                                                                                                                                                                                                                          |
| EPI_ISL_2644785,<br>EPI_ISL_2878075                                                                                                                                                                                                                                                                                                                                                                                                     | UAB Medicina practica laboratorija                                                            | Institute of Biotechnology, Life Sciences Center, Vilnius University                                                                                                                                                           | Albertas Timinskas; Alma Gedvilaite; Danguole Ziogiene; Emilija Vasiliunaite; Milda Norkiene                                                                                                                                                                                                                                                                                                                                                                                              |
| EPI_ISL_2448883                                                                                                                                                                                                                                                                                                                                                                                                                         | UCK                                                                                           | 1. National Institute of Public Health - National Institute of Hygiene, Warsaw, Poland 2. Biobank Lab, University of Lodz 3. Laboratory of Respiratory Viruses, Teaching and Clinical Center of the Medical University of Lodz | Dominik Strapagiel; Izabela Dróżdż; Jakub Lach; Katarzyna Zacharczuk; Klaudyna Królikowska; Maciej Borowiec; Magdalena Nowakowska; Magdalena Traczyk-Borszyńska; Marcin Słomka; Marta Sobalska-Kwapis; Małgorzata Sadkowska-Todys; Tomasz Płoszaj; Tomasz Wolkowicz                                                                                                                                                                                                                       |
| EPI_ISL_2597819                                                                                                                                                                                                                                                                                                                                                                                                                         | UCK                                                                                           | 1. Tricity SARS-CoV-2 sequencing consortium: University of Gdansk, Medical University of Gdansk, Vaxican Ltd., Invicta Ltd. 2. National Institute of Public Health - National Institute of Hygiene, Warsaw, Poland             | Celina Cybulska; Karolina Gackowska; Katarzyna Groth; Katarzyna Zacharczuk; Krystyna Bienkowska Szewczyk; Lukasz Rabalski; Maciej Grzybek; Maciej Kosinski; Magdalena Nowakowska; Marcin Lubocki; Małgorzata Sadkowska-Todys; Tomasz Wolkowicz                                                                                                                                                                                                                                            |
| EPI_ISL_2695124, EPI_ISL_2695125, EPI_ISL_2695130, EPI_ISL_2695132, EPI_ISL_2695134, EPI_ISL_2695136, EPI_ISL_2695144, EPI_ISL_2895164                                                                                                                                                                                                                                                                                                  |                                                                                               |                                                                                                                                                                                                                                |                                                                                                                                                                                                                                                                                                                                                                                                                                                                                           |
| see above                                                                                                                                                                                                                                                                                                                                                                                                                               | ULS Castelo Branco                                                                            | Instituto Nacional de Saude (INSA)                                                                                                                                                                                             | Borges et al                                                                                                                                                                                                                                                                                                                                                                                                                                                                              |
| EPI_ISL_2340230                                                                                                                                                                                                                                                                                                                                                                                                                         | ULS Litoral Alentejano                                                                        | Instituto Nacional de Saude (INSA)                                                                                                                                                                                             | Borges et al                                                                                                                                                                                                                                                                                                                                                                                                                                                                              |
| EPI_ISL_2249202                                                                                                                                                                                                                                                                                                                                                                                                                         | ULS Litoral Alentejano                                                                        | Instituto Nacional de Saude (INSA) and Centro de Investigação em Biodiversidade e Recursos Geneticos (CIBIO), Universidade do Porto                                                                                            | Borges et al                                                                                                                                                                                                                                                                                                                                                                                                                                                                              |
| EPI_ISL_2249115, EPI_ISL_2695165, EPI_ISL_2695170, EPI_ISL_2695172, EPI_ISL_2695173, EPI_ISL_2695174, EPI_ISL_2695175, EPI_ISL_2695176, EPI_ISL_2695204, EPI_ISL_2695205, EPI_ISL_2695206, EPI_ISL_2695210, EPI_ISL_2695217, EPI_ISL_2695218                                                                                                                                                                                            |                                                                                               |                                                                                                                                                                                                                                |                                                                                                                                                                                                                                                                                                                                                                                                                                                                                           |
| see above                                                                                                                                                                                                                                                                                                                                                                                                                               | ULS Litoral Alentejano                                                                        | Instituto Nacional de Saude (INSA) and Institute of Biomedicine (iBiMed), Universidade de Aveiro                                                                                                                               | Borges et al                                                                                                                                                                                                                                                                                                                                                                                                                                                                              |
| EPI_ISL_2376292,<br>EPI_ISL_2376294,<br>EPI_ISL_2376405,<br>EPI_ISL_2376406,<br>EPI_ISL_2376408                                                                                                                                                                                                                                                                                                                                         | ULSS 2 Marca Trevigiana                                                                       | Istituto Zooprofilattico Sperimentale delle Venezie                                                                                                                                                                            | Adelaide Milani; Alessia Schivo; Alice Fusaro; Ambra Pastori; Annalisa Salvati; Antonia Ricci; Calogero Terregino; Edoardo Giussani; Elisa Palumbo; Erika Giorgia Quaranta; Isabella Monne; Luca Tassoni                                                                                                                                                                                                                                                                                  |
| EPI_ISL_2376289,<br>EPI_ISL_2376290,<br>EPI_ISL_2376291,<br>EPI_ISL_2376379,<br>EPI_ISL_2376380,<br>EPI_ISL_2392108                                                                                                                                                                                                                                                                                                                     | ULSS 3 Venezia                                                                                | Istituto Zooprofilattico Sperimentale delle Venezie                                                                                                                                                                            | Adelaide Milani; Alessia Schivo; Alice Fusaro; Ambra Pastori; Annalisa Salvati; Antonia Ricci; Calogero Terregino; Edoardo Giussani; Elisa Palumbo; Erika Giorgia Quaranta; Isabella Monne; Luca Tassoni                                                                                                                                                                                                                                                                                  |
| EPI_ISL_2376285,<br>EPI_ISL_2376288                                                                                                                                                                                                                                                                                                                                                                                                     | ULSS 4 Veneto Orientale                                                                       | Istituto Zooprofilattico Sperimentale delle Venezie                                                                                                                                                                            | Adelaide Milani; Alessia Schivo; Alice Fusaro; Ambra Pastori; Annalisa Salvati; Antonia Ricci; Calogero Terregino; Edoardo Giussani; Elisa Palumbo; Erika Giorgia Quaranta; Isabella Monne; Luca Tassoni                                                                                                                                                                                                                                                                                  |
| EPI_ISL_2448534                                                                                                                                                                                                                                                                                                                                                                                                                         | ULSS 7 Pedemontana - Distretto 2                                                              | Istituto Zooprofilattico Sperimentale delle Venezie                                                                                                                                                                            | Adelaide Milani; Alessia Schivo; Alice Fusaro; Ambra Pastori; Annalisa Salvati; Antonia Ricci; Calogero Terregino; Edoardo Giussani; Elisa Palumbo; Erika Giorgia Quaranta; Isabella Monne; Luca Tassoni                                                                                                                                                                                                                                                                                  |
| EPI_ISL_2376296,<br>EPI_ISL_2376297,<br>EPI_ISL_2448430,<br>EPI_ISL_2448618,<br>EPI_ISL_2448619,<br>EPI_ISL_2448620                                                                                                                                                                                                                                                                                                                     | ULSS 8 Berica                                                                                 | Istituto Zooprofilattico Sperimentale delle Venezie                                                                                                                                                                            | Adelaide Milani; Alessia Schivo; Alice Fusaro; Ambra Pastori; Annalisa Salvati; Antonia Ricci; Calogero Terregino; Edoardo Giussani; Elisa Palumbo; Erika Giorgia Quaranta; Isabella Monne; Luca Tassoni                                                                                                                                                                                                                                                                                  |
| EPI_ISL_2543732                                                                                                                                                                                                                                                                                                                                                                                                                         | UM im. Karola Marcinkowskiego w Poznaniu Laboratorium UCA_Covid-19                            | 1. National Institute of Public Health - National Institute of Hygiene, Warsaw, Poland 2. Biobank Lab, University of Lodz 3. Laboratory of Respiratory Viruses, Teaching and Clinical Center of the Medical University of Lodz | Dominik Strapagiel; Izabela Dróżdż; Jakub Lach; Katarzyna Zacharczuk; Klaudyna Królikowska; Maciej Borowiec; Magdalena Nowakowska; Magdalena Traczyk-Borszyńska; Marcin Słomka; Marta Sobalska-Kwapis; Małgorzata Sadkowska-Todys; Tomasz Płoszaj; Tomasz Wolkowicz                                                                                                                                                                                                                       |
| EPI_ISL_2726793                                                                                                                                                                                                                                                                                                                                                                                                                         | UM im. Karola Marcinkowskiego w Poznaniu Laboratorium UCA_Covid-19 Centrum Biologii Medycznej | 1. National Institute of Public Health - National Institute of Hygiene, Warsaw, Poland 2. Biobank Lab, University of Lodz 3. Laboratory of Respiratory Viruses, Teaching and Clinical Center of the Medical University of Lodz | Dominik Strapagiel; Izabela Dróżdż; Jakub Lach; Katarzyna Zacharczuk; Klaudyna Królikowska; Maciej Borowiec; Magdalena Nowakowska; Magdalena Traczyk-Borszyńska; Marcin Słomka; Marta Sobalska-Kwapis; Małgorzata Sadkowska-Todys; Tomasz Płoszaj; Tomasz Wolkowicz                                                                                                                                                                                                                       |
| EPI_ISL_1993936,<br>EPI_ISL_2099526,<br>EPI_ISL_2132653                                                                                                                                                                                                                                                                                                                                                                                 | UMC Groningen, Clinical Virology, Department of Medical Microbiology and Infection Prevention | UMC Groningen, Clinical Virology, Department of Medical Microbiology and Infection Prevention                                                                                                                                  | Alexander Friedrich; Coretta Van Leer-Buter; Erley Lizarazo-Forero; Hubert Niesters; Lilli Gard; Marjolain Knoester; Monika Fliss; Sigrid Rosema; Xuewei Zhou                                                                                                                                                                                                                                                                                                                             |
| EPI_ISL_2658352,<br>EPI_ISL_2886117,<br>EPI_ISL_2886121,<br>EPI_ISL_2887964                                                                                                                                                                                                                                                                                                                                                             | UMC Utrecht                                                                                   | UMC Utrecht                                                                                                                                                                                                                    | Annemarie Wensing; Anniek Tanja; Pascal Mantiri; Rob Schuurman                                                                                                                                                                                                                                                                                                                                                                                                                            |
| EPI_ISL_2249037, EPI_ISL_2628687, EPI_ISL_2628850, EPI_ISL_2628923, EPI_ISL_2628927, EPI_ISL_2628964, EPI_ISL_2645947, EPI_ISL_2645961, EPI_ISL_2645965, EPI_ISL_2645979, EPI_ISL_2646008, EPI_ISL_2646041, EPI_ISL_2646057, EPI_ISL_2646096, EPI_ISL_2796353, EPI_ISL_2810493, EPI_ISL_2810644, EPI_ISL_2810648, EPI_ISL_2810658, EPI_ISL_2810682, EPI_ISL_2810744, EPI_ISL_2895501, EPI_ISL_2895619, EPI_ISL_2895623, EPI_ISL_2895628 |                                                                                               |                                                                                                                                                                                                                                |                                                                                                                                                                                                                                                                                                                                                                                                                                                                                           |
| see above                                                                                                                                                                                                                                                                                                                                                                                                                               | UNILABS                                                                                       | Instituto Nacional de Saude (INSA)                                                                                                                                                                                             | Borges et al                                                                                                                                                                                                                                                                                                                                                                                                                                                                              |
| EPI_ISL_2810382                                                                                                                                                                                                                                                                                                                                                                                                                         | UNILABS                                                                                       | Instituto Nacional de Saude (INSA) and BioSystems & Integrative Sciences Institute (BioSI) Genomics Unit, FCUL                                                                                                                 | Borges et al                                                                                                                                                                                                                                                                                                                                                                                                                                                                              |
| EPI_ISL_2796012,<br>EPI_ISL_2796021,<br>EPI_ISL_2796032,<br>EPI_ISL_2796038,<br>EPI_ISL_2796154,<br>EPI_ISL_2796174                                                                                                                                                                                                                                                                                                                     | UNILABS                                                                                       | Instituto Nacional de Saude (INSA) and Instituto Gulbenkian de Ciencia (IGC)                                                                                                                                                   | Borges et al                                                                                                                                                                                                                                                                                                                                                                                                                                                                              |
| EPI_ISL_2854707                                                                                                                                                                                                                                                                                                                                                                                                                         | UPTD LABKESDA Kota Samarinda                                                                  | National Institute of Health Research and Development                                                                                                                                                                          | Arie Ardiansyah Nugraha; Hana Aparsi Pawestri; Hartanti Dian Ikawati; Kartika Dewi Puspa; Krisna Pangesti; Nelly Puspandari; Subangkit; Triyani Soekarso; Vivi Setiawaty                                                                                                                                                                                                                                                                                                                  |
| EPI_ISL_2715293                                                                                                                                                                                                                                                                                                                                                                                                                         | US Air Force School of Aerospace Medicine                                                     | US Air Force School of Aerospace Medicine                                                                                                                                                                                      | Amanda Javorina; Anthony Fries; Carol Garrett; Clarise Starr; Elizabeth Macias; Jennifer Meyer; Sarah Purves; William Gruner                                                                                                                                                                                                                                                                                                                                                              |
| EPI_ISL_1620980, EPI_ISL_1715512, EPI_ISL_1826132, EPI_ISL_1850287, EPI_ISL_2002689, EPI_ISL_2031536, EPI_ISL_2082516, EPI_ISL_2618216, EPI_ISL_2618292, EPI_ISL_2802933, EPI_ISL_2803144, EPI_ISL_2803159                                                                                                                                                                                                                              |                                                                                               |                                                                                                                                                                                                                                |                                                                                                                                                                                                                                                                                                                                                                                                                                                                                           |

|                                                                                                                                                                                                                                                                                                                                                                                                                                                                                                                                                                                                                                                                                                                                                                                                                                                                                                                                                                                        |                                                                                                                                  |                                                                                                                                                                                                                                                                                                                                                                                                                                                                                     |                                                                                                                                                                                                                                                                                                                                                                                                                                                                                                                                                                                                                                                                                                                                                                                                                                                                                                                                                                                                                                                                                                                                                                                                                                                                                                                                                                                                                                                                                                                                                                                                                                            |
|----------------------------------------------------------------------------------------------------------------------------------------------------------------------------------------------------------------------------------------------------------------------------------------------------------------------------------------------------------------------------------------------------------------------------------------------------------------------------------------------------------------------------------------------------------------------------------------------------------------------------------------------------------------------------------------------------------------------------------------------------------------------------------------------------------------------------------------------------------------------------------------------------------------------------------------------------------------------------------------|----------------------------------------------------------------------------------------------------------------------------------|-------------------------------------------------------------------------------------------------------------------------------------------------------------------------------------------------------------------------------------------------------------------------------------------------------------------------------------------------------------------------------------------------------------------------------------------------------------------------------------|--------------------------------------------------------------------------------------------------------------------------------------------------------------------------------------------------------------------------------------------------------------------------------------------------------------------------------------------------------------------------------------------------------------------------------------------------------------------------------------------------------------------------------------------------------------------------------------------------------------------------------------------------------------------------------------------------------------------------------------------------------------------------------------------------------------------------------------------------------------------------------------------------------------------------------------------------------------------------------------------------------------------------------------------------------------------------------------------------------------------------------------------------------------------------------------------------------------------------------------------------------------------------------------------------------------------------------------------------------------------------------------------------------------------------------------------------------------------------------------------------------------------------------------------------------------------------------------------------------------------------------------------|
| see above                                                                                                                                                                                                                                                                                                                                                                                                                                                                                                                                                                                                                                                                                                                                                                                                                                                                                                                                                                              | UW Virology Lab                                                                                                                  | UW Virology Lab                                                                                                                                                                                                                                                                                                                                                                                                                                                                     | Alexander Greninger; Hong Xie; Keith R Jerome; Lasata Shrestha; Meeli-Li Huang; Michelle Lin; Nathan Breit; Noah R. Baker; Patrick Mathias; Pavitra Roychoudhury; Ricardo Perez; Robert J. Livingston; Saraswathi Sathees; Sean Ellis; Shah Mohamed Bakhash; Tien V. Nguyen                                                                                                                                                                                                                                                                                                                                                                                                                                                                                                                                                                                                                                                                                                                                                                                                                                                                                                                                                                                                                                                                                                                                                                                                                                                                                                                                                                |
| EPI_ISL_2681130, EPI_ISL_2681218, EPI_ISL_2801578, EPI_ISL_2801595                                                                                                                                                                                                                                                                                                                                                                                                                                                                                                                                                                                                                                                                                                                                                                                                                                                                                                                     | Unidad de Investigación Médica de Yucatán (UIMY)                                                                                 | Instituto de Biotecnología de la UNAM                                                                                                                                                                                                                                                                                                                                                                                                                                               | ; Alejandra García-Gasca; Alejandra Hernández-Terán; Alejandro Sánchez-Flores; Alfredo Herrera-Estrella; Alicia Ocaña-Mondragón; Andreu Comas-García; Angel Gustavo Salas-Lais; Antonio Loza Román; Bernardo Martínez-Miguel; Blanca Taboada; Brenda Irasema Maldonado-Meza; Bruno Gómez-Gil; Carla Ivón Herrera-Najera; Carlos F. Arias; Celia Boukadidja; Clara Esperanza Santacruz-Tinoco; Concepción Grajales-Muñiz; Consorcio Mexicano de Vigilancia Genómica (CoVigen-Mex). Authors (in alphabetical order): Julio Elias Alvarado-Yaah; Cristóbal Cháidez-Quiróz; Célida Duque Molina; Célida Martínez- Rodríguez; Daniel Fregoso-Rueda; Daniel Lira Morales; Eduardo Becerril-Vargas; Fernando Fontove-Herrera; Fidencio Mejía-Nepomuceno; Francisco Pulido; Gloria Elena Espinosa-Ayala; Gloria María Molina-Salinas; Gloria Vazquez; Hector Esteban Paz-Juárez; Hector Montoya-Fuentes; Helen Haydee Fernanda Ramirez-Plascencia; Irvin González-López; Jean Pierre González; Jesús Hernández; Joel Armando Vázquez-Pérez; Jorge Salas-Hernández; José Antonio Enciso-Moreno; José Arturo Martínez-Orozco; José Esteban Muñoz-Medina; José de Jesús Nuñez-Contreras; Juan Bautista Chale-Dzul; Julissa Enciso-Ibarra; Luis Alberto Ochoa-Carrera; Margarita Matías-Florentino; Mario Mújica-Sánchez; Marissa Perez-García; María Guadalupe Santiago-Mauricio; María Guadalupe de Jesús Mireles-Rivera; Nelly Sélem-Mojica; Pavel Isa; Ricardo Ciria Merce; Ricardo Grande; Rosa María Gutiérrez Rios; Santiago Ávila-Rios; Selene Zárate; Susana Lopez; Verónica Mata-Haro; Victor Eduardo García-Arias; Víctor Hugo Borja-Aburto |
| EPI_ISL_2837266, EPI_ISL_2837299                                                                                                                                                                                                                                                                                                                                                                                                                                                                                                                                                                                                                                                                                                                                                                                                                                                                                                                                                       | Unidade de apoio ao diagnostico da COVID - UNADIG                                                                                | Bioinformatics Laboratory / LNCC                                                                                                                                                                                                                                                                                                                                                                                                                                                    | Alessandra P Lamarca; Alexandra L Gerber; Amílcar Tanuri; Ana Paula de C Guimarães; Ana Tereza R Vasconcelos; Andrea Cony Cavalcanti; Caio Luiz Pereira Ribeiro; Cassia Alves; Cintia Policarpo; Claudia Maria Braga de Mello; Cristiane Gomes da Silva; Diana Mariani; Douglas Terra Machado; Flavio Dias da Silva; Gleidson da Silva de Oliveira; Leandro Magalhaes de Souza; Liliane Cavalcante; Luiz G P de Almeida; Marcio Henrique de Oliveira Garcia; Mario Sergio Ribeiro; Ronaldo da Silva F Jr; Silvia Carvalho                                                                                                                                                                                                                                                                                                                                                                                                                                                                                                                                                                                                                                                                                                                                                                                                                                                                                                                                                                                                                                                                                                                  |
| EPI_ISL_2678452                                                                                                                                                                                                                                                                                                                                                                                                                                                                                                                                                                                                                                                                                                                                                                                                                                                                                                                                                                        | Uniklinikum Carl Gustav Carus an der TU Dresden; Institut für Virologie                                                          | Robert Koch Institute                                                                                                                                                                                                                                                                                                                                                                                                                                                               |                                                                                                                                                                                                                                                                                                                                                                                                                                                                                                                                                                                                                                                                                                                                                                                                                                                                                                                                                                                                                                                                                                                                                                                                                                                                                                                                                                                                                                                                                                                                                                                                                                            |
| EPI_ISL_2832815, EPI_ISL_2833593, EPI_ISL_2833594, EPI_ISL_2833598, EPI_ISL_2840167                                                                                                                                                                                                                                                                                                                                                                                                                                                                                                                                                                                                                                                                                                                                                                                                                                                                                                    | Unilabs                                                                                                                          | Karolinska University Hospital                                                                                                                                                                                                                                                                                                                                                                                                                                                      | Annelie Bjerkner; Isak Sylvin; Jan Albert; Karolina Iininbergs; Lina Guerra Blomqvist; Lynda Eneh; Martin Ekman; Martina Wahlund; Robert Dyrdak; Sandra Broddesson; Tanja Normark; Tobias Allander; Valtteri Wirta; Zhibing Yun                                                                                                                                                                                                                                                                                                                                                                                                                                                                                                                                                                                                                                                                                                                                                                                                                                                                                                                                                                                                                                                                                                                                                                                                                                                                                                                                                                                                            |
| EPI_ISL_2483123, EPI_ISL_2820867, EPI_ISL_2820880                                                                                                                                                                                                                                                                                                                                                                                                                                                                                                                                                                                                                                                                                                                                                                                                                                                                                                                                      | Unilabs Laboratory Medicine                                                                                                      | Norwegian Institute of Public Health, Department of Virology                                                                                                                                                                                                                                                                                                                                                                                                                        | Atiya R Ali; Debech Nadia; Engebretsen Serina Beate; Garcia Llorente Ignacio; Hilde Elshaug; Hilde Vollan; Jon Bråte; Kamilla Heddeland Instefjord; Karoline Bragstad; Kathrine Stene-Johansen; Line Victoria Moen; Marie Paulsen Madsen; Olav Hungnes; Pedersen Benedikte Nevjen; Rasmus Riis Kopperud                                                                                                                                                                                                                                                                                                                                                                                                                                                                                                                                                                                                                                                                                                                                                                                                                                                                                                                                                                                                                                                                                                                                                                                                                                                                                                                                    |
| EPI_ISL_2622828, EPI_ISL_2816496                                                                                                                                                                                                                                                                                                                                                                                                                                                                                                                                                                                                                                                                                                                                                                                                                                                                                                                                                       | University College London, Great Ormond Street Hospital for Children NHS Foundation Trust, Imperial College Healthcare NHS Trust | COVID-19 Genomics UK (COG-UK) Consortium                                                                                                                                                                                                                                                                                                                                                                                                                                            | Alison Holmes; Charlotte Williams; Helena Tutill; Jacqueline Findlay; James Price; Judith Breuer; Julianne Brown; Kathryn Harris; Leysa Forrest; Marius Cotic; Mark Kristiansen; Nadua Bayzid; Paola Niola; Paola Resende Silva; Patricia Dyal; Paul Randell; Rachel Williams; Samuel Weeks; Sergi Castellano; Sunando Roy; Tony Brooks; Yasmin Panchbhaya                                                                                                                                                                                                                                                                                                                                                                                                                                                                                                                                                                                                                                                                                                                                                                                                                                                                                                                                                                                                                                                                                                                                                                                                                                                                                 |
| EPI_ISL_2841707                                                                                                                                                                                                                                                                                                                                                                                                                                                                                                                                                                                                                                                                                                                                                                                                                                                                                                                                                                        | University Hospital of Northern Norway, Department for Microbiology and Infectious Disease Control                               | Norwegian Institute of Public Health, Department of Virology                                                                                                                                                                                                                                                                                                                                                                                                                        | Atiya R Ali; Debech Nadia; Engebretsen Serina Beate; Garcia Llorente Ignacio; Hilde Elshaug; Hilde Vollan; Jon Bråte; Kamilla Heddeland Instefjord; Karoline Bragstad; Kathrine Stene-Johansen; Line Victoria Moen; Marie Paulsen Madsen; Olav Hungnes; Pedersen Benedikte Nevjen; Rasmus Riis Kopperud                                                                                                                                                                                                                                                                                                                                                                                                                                                                                                                                                                                                                                                                                                                                                                                                                                                                                                                                                                                                                                                                                                                                                                                                                                                                                                                                    |
| EPI_ISL_1811202, EPI_ISL_1963298, EPI_ISL_1963299, EPI_ISL_1963300, EPI_ISL_2104479, EPI_ISL_2104494, EPI_ISL_2213568, EPI_ISL_2213571, EPI_ISL_2213579, EPI_ISL_2213582, EPI_ISL_2213584, EPI_ISL_2343033, EPI_ISL_2343068, EPI_ISL_2343125, EPI_ISL_2490656, EPI_ISL_2490657, EPI_ISL_2681456, EPI_ISL_2681461, EPI_ISL_2790082, EPI_ISL_2790084, EPI_ISL_2790088, EPI_ISL_2790092, EPI_ISL_2790094, EPI_ISL_2885473, EPI_ISL_2885480, EPI_ISL_2885497, EPI_ISL_2885498, EPI_ISL_2885502, EPI_ISL_2885504                                                                                                                                                                                                                                                                                                                                                                                                                                                                            | HUG, Laboratory of Virology and the Health2030 Genome Center                                                                     | Ana Rita Goncalves; Deborah Penet; Emmanouil Dermitzakis; Henri Pegeot; Ioannis Xenarios; Keith Harshman; Laurent Kaiser; Lorenzo Cerutti; Melyssa Elies; Samuel Cordey                                                                                                                                                                                                                                                                                                             |                                                                                                                                                                                                                                                                                                                                                                                                                                                                                                                                                                                                                                                                                                                                                                                                                                                                                                                                                                                                                                                                                                                                                                                                                                                                                                                                                                                                                                                                                                                                                                                                                                            |
| see above                                                                                                                                                                                                                                                                                                                                                                                                                                                                                                                                                                                                                                                                                                                                                                                                                                                                                                                                                                              | University Hospitals of Geneva, Laboratory of Virology                                                                           |                                                                                                                                                                                                                                                                                                                                                                                                                                                                                     |                                                                                                                                                                                                                                                                                                                                                                                                                                                                                                                                                                                                                                                                                                                                                                                                                                                                                                                                                                                                                                                                                                                                                                                                                                                                                                                                                                                                                                                                                                                                                                                                                                            |
| EPI_ISL_1922125                                                                                                                                                                                                                                                                                                                                                                                                                                                                                                                                                                                                                                                                                                                                                                                                                                                                                                                                                                        | University of Bari Biomedical Sciences and Human Oncology                                                                        | University of Bari Biomedical Sciences and Human Oncology                                                                                                                                                                                                                                                                                                                                                                                                                           | Accogli M.; Chironna M.; Loconsole D.; Sallustio A.                                                                                                                                                                                                                                                                                                                                                                                                                                                                                                                                                                                                                                                                                                                                                                                                                                                                                                                                                                                                                                                                                                                                                                                                                                                                                                                                                                                                                                                                                                                                                                                        |
| EPI_ISL_2692117                                                                                                                                                                                                                                                                                                                                                                                                                                                                                                                                                                                                                                                                                                                                                                                                                                                                                                                                                                        | University of Illinois at Chicago                                                                                                | RIPHL at Rush University Medical Center                                                                                                                                                                                                                                                                                                                                                                                                                                             | Felix Araujo Perez; Julie Bentea; Kevin Kunstman; Laura Furtado; Marieta Hyde; Max Kolton; Omar Perez; Stefan Green                                                                                                                                                                                                                                                                                                                                                                                                                                                                                                                                                                                                                                                                                                                                                                                                                                                                                                                                                                                                                                                                                                                                                                                                                                                                                                                                                                                                                                                                                                                        |
| EPI_ISL_2003438, EPI_ISL_2500011                                                                                                                                                                                                                                                                                                                                                                                                                                                                                                                                                                                                                                                                                                                                                                                                                                                                                                                                                       | University of Liège COVID-19 testing center                                                                                      | GIGA Medical Genomics                                                                                                                                                                                                                                                                                                                                                                                                                                                               | Bouchra Boujemla; Cécile Meex; Fabrice Bureau; Keith Durkin; Laurent Gillet; Maria Artesi; Marie-Pierre Hayette; Nathalie Renotte; Pierrette Melin; Raphaël Boreux; Sébastien Bontems; Vincent Bours; Wouter Coppieters                                                                                                                                                                                                                                                                                                                                                                                                                                                                                                                                                                                                                                                                                                                                                                                                                                                                                                                                                                                                                                                                                                                                                                                                                                                                                                                                                                                                                    |
| EPI_ISL_2803661, EPI_ISL_2803662, EPI_ISL_2803663, EPI_ISL_2803665, EPI_ISL_2803666, EPI_ISL_2803668, EPI_ISL_2803689, EPI_ISL_2803691, EPI_ISL_2803692, EPI_ISL_2803693, EPI_ISL_2803694, EPI_ISL_2803695, EPI_ISL_2803696, EPI_ISL_2803697, EPI_ISL_2803698, EPI_ISL_2803700, EPI_ISL_2803702, EPI_ISL_2803703, EPI_ISL_2803704, EPI_ISL_2803705, EPI_ISL_2803706, EPI_ISL_2803707, EPI_ISL_2803708, EPI_ISL_2803709, EPI_ISL_2803710, EPI_ISL_2803711, EPI_ISL_2803712, EPI_ISL_2803713, EPI_ISL_2803715, EPI_ISL_2803716, EPI_ISL_2803717, EPI_ISL_2803718, EPI_ISL_2803719, EPI_ISL_2803720, EPI_ISL_2803721, EPI_ISL_2803722, EPI_ISL_2803723, EPI_ISL_2803725, EPI_ISL_2803726, EPI_ISL_2803727, EPI_ISL_2803728, EPI_ISL_2803729, EPI_ISL_2803730, EPI_ISL_2803731, EPI_ISL_2803732, EPI_ISL_2803733, EPI_ISL_2803734, EPI_ISL_2803735, EPI_ISL_2803736, EPI_ISL_2803738, EPI_ISL_2803739, EPI_ISL_2803740, EPI_ISL_2803741, EPI_ISL_2803742, EPI_ISL_2803743, EPI_ISL_2803744 | UNZAVET and PATH                                                                                                                 | Daniel Bridges; Mulenga Mwenda-Chimfwembe; Ngonda Saasa; ZNPHI and ZGSC                                                                                                                                                                                                                                                                                                                                                                                                             |                                                                                                                                                                                                                                                                                                                                                                                                                                                                                                                                                                                                                                                                                                                                                                                                                                                                                                                                                                                                                                                                                                                                                                                                                                                                                                                                                                                                                                                                                                                                                                                                                                            |
| see above                                                                                                                                                                                                                                                                                                                                                                                                                                                                                                                                                                                                                                                                                                                                                                                                                                                                                                                                                                              | University of Zambia, School of Veterinary Medicine                                                                              |                                                                                                                                                                                                                                                                                                                                                                                                                                                                                     |                                                                                                                                                                                                                                                                                                                                                                                                                                                                                                                                                                                                                                                                                                                                                                                                                                                                                                                                                                                                                                                                                                                                                                                                                                                                                                                                                                                                                                                                                                                                                                                                                                            |
| EPI_ISL_2558055                                                                                                                                                                                                                                                                                                                                                                                                                                                                                                                                                                                                                                                                                                                                                                                                                                                                                                                                                                        | University of the Philippines National Institutes of Health (UP NIH)                                                             | Philippine Genome Center                                                                                                                                                                                                                                                                                                                                                                                                                                                            | Alethea R. de Guzman; Anna Ong-Lim; Arianne A. Zamora; Asia Louisa U. Chong; Benedict A. Maralit; Candice Francheska B. Tambaao; Carlo M. Lapid; Celia Carlos; Devon Ray Pacial; Edsel Maurice Salvaña; El King D. Morado; Elcid Aaron R. Panglinan; Eva Maria Cutingco-co de la Paz; Francis A. Tablizo; Irish Coleen A. Asin; Jaime C. Montoya; Jan Michael C. Yap; Jo-Hannah S. Llamas; John Q. Wong; Joshua Gregor A. Dizon; Juan Antonio R. Magalang; Karol Sophia Agape R. Padilla; Kenneth M. Kim; Kris P. Punayan; Marc Edsel C. Ayes; Francis A. Tablizo; Maria Rosario Singh-Vergeire and Cynthia P. Saloma; Maria Sofia L. Yangson; Marissa Alejandra; Razel Nikka M. Hao; Renato Jacinto Q. Mantaring; Rainna Patricia S. Cruz; Sheila Mae M. Araiza                                                                                                                                                                                                                                                                                                                                                                                                                                                                                                                                                                                                                                                                                                                                                                                                                                                                           |
| EPI_ISL_2600538, EPI_ISL_2686067                                                                                                                                                                                                                                                                                                                                                                                                                                                                                                                                                                                                                                                                                                                                                                                                                                                                                                                                                       | Università degli Studi di Perugia                                                                                                | Istituto Zooprofilattico Sperimentale dell'Abruzzo e Molise "G. Caporale"                                                                                                                                                                                                                                                                                                                                                                                                           | Ancora M; Biagetti M; Calistri P; Camilioni B; Cammà C; Curini V; Delli Compagni E; Di Domenico M; Di Pasquale A; Giammarioli M; Lorusso A; Mangone I; Marcacci M; Mencacci A; Puglia I; Rinaldi A; Savini G; Scialabba S                                                                                                                                                                                                                                                                                                                                                                                                                                                                                                                                                                                                                                                                                                                                                                                                                                                                                                                                                                                                                                                                                                                                                                                                                                                                                                                                                                                                                  |
| EPI_ISL_2769117, EPI_ISL_2858698, EPI_ISL_2875836, EPI_ISL_2875938, EPI_ISL_2875941, EPI_ISL_2875942                                                                                                                                                                                                                                                                                                                                                                                                                                                                                                                                                                                                                                                                                                                                                                                                                                                                                   | UniversitätsSpital Zürich                                                                                                        | Institute of Medical Virology                                                                                                                                                                                                                                                                                                                                                                                                                                                       | Alexandra Trkola; Annette Audigé; Catharine Aquino; Cyril Shah; Daniel Ehrsam; Gabriela Ziltener; Guido Bloemberg; Hubert Rehrauer; Isabel Stürmer; Joel Wirz; Jon Huder; Jürg Böni; Kevin Steiner; Maria Grünberg; Maryam Zaheri; Michael Huber; Riccarda Capaul; Stefan Schmutz; Verena Kufner; Weihong Qi                                                                                                                                                                                                                                                                                                                                                                                                                                                                                                                                                                                                                                                                                                                                                                                                                                                                                                                                                                                                                                                                                                                                                                                                                                                                                                                               |
| EPI_ISL_2360239, EPI_ISL_2761960                                                                                                                                                                                                                                                                                                                                                                                                                                                                                                                                                                                                                                                                                                                                                                                                                                                                                                                                                       | UniversitätsSpital Zürich 009                                                                                                    | Institute of Medical Virology                                                                                                                                                                                                                                                                                                                                                                                                                                                       | Alexandra Trkola; Annette Audigé; Cyril Shah; Gabriela Ziltener; Guido Bloemberg; Jon Huder; Jürg Böni; Kevin Steiner; Maria Grünberg; Maryam Zaheri; Michael Huber; Riccarda Capaul; Stefan Schmutz; Verena Kufner                                                                                                                                                                                                                                                                                                                                                                                                                                                                                                                                                                                                                                                                                                                                                                                                                                                                                                                                                                                                                                                                                                                                                                                                                                                                                                                                                                                                                        |
| EPI_ISL_2761960                                                                                                                                                                                                                                                                                                                                                                                                                                                                                                                                                                                                                                                                                                                                                                                                                                                                                                                                                                        | Universitätsklinikum Frankfurt - Institut für Medizinische Virologie                                                             | Robert Koch Institute                                                                                                                                                                                                                                                                                                                                                                                                                                                               |                                                                                                                                                                                                                                                                                                                                                                                                                                                                                                                                                                                                                                                                                                                                                                                                                                                                                                                                                                                                                                                                                                                                                                                                                                                                                                                                                                                                                                                                                                                                                                                                                                            |
| EPI_ISL_2290622                                                                                                                                                                                                                                                                                                                                                                                                                                                                                                                                                                                                                                                                                                                                                                                                                                                                                                                                                                        | Uniwersyteckie Centrum Kliniczne                                                                                                 | 1. National Institute of Public Health - National Institute of Hygiene, Warsaw, Poland 2. Biobank Lab, University of Lodz 3. Laboratory of Respiratory Viruses, Teaching and Clinical Center of the Medical University of Lodz                                                                                                                                                                                                                                                      | Dominik Strapagiel; Izabela Drózdż; Jakub Lach; Katarzyna Zacharczuk; Klaudyna Królikowska; Maciej Borowiec; Magdalena Nowakowska; Magdalena Traczyk-Borszyńska; Marcin Słomka; Marta Sobalska-Kwapis; Małgorzata Sadkowska-Todys; Tomasz Płoszaj; Tomasz Wolkowicz                                                                                                                                                                                                                                                                                                                                                                                                                                                                                                                                                                                                                                                                                                                                                                                                                                                                                                                                                                                                                                                                                                                                                                                                                                                                                                                                                                        |
| EPI_ISL_2840601, EPI_ISL_2840602, EPI_ISL_2840603, EPI_ISL_2840604                                                                                                                                                                                                                                                                                                                                                                                                                                                                                                                                                                                                                                                                                                                                                                                                                                                                                                                     | Urban Institute for Disease Prevention and Control                                                                               | National Institute of Health, Department of Medical Sciences, Ministry of Public Health, Thailand                                                                                                                                                                                                                                                                                                                                                                                   | ; Natchaya Khidsang; Nuttida Thongpramul; Pakorn Promtong; Pilailuk Okada; Ratana Tacharoenmuang; Siripaporn Phuygun; Sittiporn Parmnen; Sunthareeya Waicharoen; Thanutsapa Thanadachakul; Warawan Wongboot; sirikanda wimol                                                                                                                                                                                                                                                                                                                                                                                                                                                                                                                                                                                                                                                                                                                                                                                                                                                                                                                                                                                                                                                                                                                                                                                                                                                                                                                                                                                                               |
| EPI_ISL_2020949                                                                                                                                                                                                                                                                                                                                                                                                                                                                                                                                                                                                                                                                                                                                                                                                                                                                                                                                                                        | Urban Public Health Centre (UPHC), SECTOR-2, Gandhinagar                                                                         | Gujarat Biotechnology Research Centre                                                                                                                                                                                                                                                                                                                                                                                                                                               | Amit Kanani; Amrutlal Patel; Bhargav Waghela; Bhumika Prajapati; Chaitanya Joshi; Dinesh Kumar; Janvi Raval; Kalpesh Goswami; Madhvi Joshi; Nilen Patel; Nitesh Shah; Nitin Savaliya; Ramesh Pandit; Sonal Sharma; Tejendra Purohit; Twinkle Soni; Umang Mishra; Zarna Patel; Zuber Saiyed                                                                                                                                                                                                                                                                                                                                                                                                                                                                                                                                                                                                                                                                                                                                                                                                                                                                                                                                                                                                                                                                                                                                                                                                                                                                                                                                                 |
| EPI_ISL_2291743, EPI_ISL_2678942, EPI_ISL_2856341, EPI_ISL_2856542, EPI_ISL_2856648, EPI_ISL_2857081, EPI_ISL_2857269, EPI_ISL_2857287, EPI_ISL_2857891                                                                                                                                                                                                                                                                                                                                                                                                                                                                                                                                                                                                                                                                                                                                                                                                                                | Utah Public Health Laboratory                                                                                                    | Utah Public Health Laboratory                                                                                                                                                                                                                                                                                                                                                                                                                                                       | Erin L. Young; Kelly F. Oakeson; Olinto Linares-Perdomo; Tara Gallagher                                                                                                                                                                                                                                                                                                                                                                                                                                                                                                                                                                                                                                                                                                                                                                                                                                                                                                                                                                                                                                                                                                                                                                                                                                                                                                                                                                                                                                                                                                                                                                    |
| EPI_ISL_1824682, EPI_ISL_1824683, EPI_ISL_1824684, EPI_ISL_2285157, EPI_ISL_2285158, EPI_ISL_2285159, EPI_ISL_2285160                                                                                                                                                                                                                                                                                                                                                                                                                                                                                                                                                                                                                                                                                                                                                                                                                                                                  | VITHAS Lab                                                                                                                       | Microbiology Department, Complexo Hospitalario Universitario de Vigo                                                                                                                                                                                                                                                                                                                                                                                                                | Camacho AT; Perez S; Requeiro B                                                                                                                                                                                                                                                                                                                                                                                                                                                                                                                                                                                                                                                                                                                                                                                                                                                                                                                                                                                                                                                                                                                                                                                                                                                                                                                                                                                                                                                                                                                                                                                                            |
| EPI_ISL_2001196, EPI_ISL_2017735                                                                                                                                                                                                                                                                                                                                                                                                                                                                                                                                                                                                                                                                                                                                                                                                                                                                                                                                                       | VRDL, Government Medical College (GMC), Surat                                                                                    | Gujarat Biotechnology Research Centre                                                                                                                                                                                                                                                                                                                                                                                                                                               | Chaitanya Joshi; Dinesh Kumar; Janvi Raval; Madhvi Joshi; Neeta Khandelwal; Nitesh Shah; Nitin Savaliya; Ramesh Pandit; Sonal Sharma; Twinkle Soni; Umang Mishra; Zarna Patel; Zuber Saiyed                                                                                                                                                                                                                                                                                                                                                                                                                                                                                                                                                                                                                                                                                                                                                                                                                                                                                                                                                                                                                                                                                                                                                                                                                                                                                                                                                                                                                                                |
| EPI_ISL_2379667, EPI_ISL_2420172, EPI_ISL_2420215, EPI_ISL_2420238, EPI_ISL_2521350, EPI_ISL_2521371, EPI_ISL_2622049, EPI_ISL_2622050, EPI_ISL_2622055, EPI_ISL_2622063, EPI_ISL_2622067, EPI_ISL_2622076, EPI_ISL_2731277, EPI_ISL_2731278                                                                                                                                                                                                                                                                                                                                                                                                                                                                                                                                                                                                                                                                                                                                           | Valais Hospital, Central Institute                                                                                               | Valais Hospital, Central Institute                                                                                                                                                                                                                                                                                                                                                                                                                                                  | Alexis Dumoulin; Deborah Penet; Emmanouil Dermitzakis; Henri Pegeot; Ioannis Xenarios; Keith Harshman; Lorenzo Cerutti; Melyssa Elies                                                                                                                                                                                                                                                                                                                                                                                                                                                                                                                                                                                                                                                                                                                                                                                                                                                                                                                                                                                                                                                                                                                                                                                                                                                                                                                                                                                                                                                                                                      |
| see above                                                                                                                                                                                                                                                                                                                                                                                                                                                                                                                                                                                                                                                                                                                                                                                                                                                                                                                                                                              | Valais Hospital, Central Institute                                                                                               |                                                                                                                                                                                                                                                                                                                                                                                                                                                                                     |                                                                                                                                                                                                                                                                                                                                                                                                                                                                                                                                                                                                                                                                                                                                                                                                                                                                                                                                                                                                                                                                                                                                                                                                                                                                                                                                                                                                                                                                                                                                                                                                                                            |
| EPI_ISL_1662284                                                                                                                                                                                                                                                                                                                                                                                                                                                                                                                                                                                                                                                                                                                                                                                                                                                                                                                                                                        | Veer Surendra Sai Institute of Medical Sciences and Research, Burla, Sambalpur                                                   | Institute of Life Sciences - INSACOG                                                                                                                                                                                                                                                                                                                                                                                                                                                | Ajay Parida; Amol M. Kanampalliwar; Anup Ghosh; Atimukta Jha; INSACOG Consortium; Punit Prasad; Rajeeb Swain; Rupesh Dash; Safal Walia; Shifu Aggarwal; Sunil K. Raghav                                                                                                                                                                                                                                                                                                                                                                                                                                                                                                                                                                                                                                                                                                                                                                                                                                                                                                                                                                                                                                                                                                                                                                                                                                                                                                                                                                                                                                                                    |
| EPI_ISL_2675078, EPI_ISL_2675080, EPI_ISL_2675093, EPI_ISL_2675094, EPI_ISL_2725077, EPI_ISL_2790020, EPI_ISL_2790022                                                                                                                                                                                                                                                                                                                                                                                                                                                                                                                                                                                                                                                                                                                                                                                                                                                                  | Vestfold Hospital, Toensberg Department of Microbiology                                                                          | Norwegian Institute of Public Health, Department of Virology                                                                                                                                                                                                                                                                                                                                                                                                                        | Atiya R Ali; Debech Nadia; Engebretsen Serina Beate; Garcia Llorente Ignacio; Hilde Elshaug; Hilde Vollan; Jon Bråte; Kamilla Heddeland Instefjord; Karoline Bragstad; Kathrine Stene-Johansen; Line Victoria Moen; Marie Paulsen Madsen; Olav Hungnes; Pedersen Benedikte Nevjen; Rasmus Riis Kopperud                                                                                                                                                                                                                                                                                                                                                                                                                                                                                                                                                                                                                                                                                                                                                                                                                                                                                                                                                                                                                                                                                                                                                                                                                                                                                                                                    |
| EPI_ISL_2820895, EPI_ISL_2820932                                                                                                                                                                                                                                                                                                                                                                                                                                                                                                                                                                                                                                                                                                                                                                                                                                                                                                                                                       | Vestfold Hospital, Toensberg Department of Microbiology                                                                          | Norwegian Institute of Public Health, Department of Virology                                                                                                                                                                                                                                                                                                                                                                                                                        | Atiya R Ali; Debech Nadia; Engebretsen Serina Beate; Garcia Llorente Ignacio; Hilde Elshaug; Hilde Vollan; Jon Bråte; Kamilla Heddeland Instefjord; Karoline Bragstad; Kathrine Stene-Johansen; Line Victoria Moen; Marie Paulsen Madsen; Olav Hungnes; Pedersen Benedikte Nevjen; Rasmus Riis Kopperud                                                                                                                                                                                                                                                                                                                                                                                                                                                                                                                                                                                                                                                                                                                                                                                                                                                                                                                                                                                                                                                                                                                                                                                                                                                                                                                                    |
| EPI_ISL_2878070, EPI_ISL_2885922                                                                                                                                                                                                                                                                                                                                                                                                                                                                                                                                                                                                                                                                                                                                                                                                                                                                                                                                                       | Viešoji įstaiga Klaipėdos universitetinė ligoninė                                                                                | Institute of Biotechnology, Life Sciences Center, Vilnius University                                                                                                                                                                                                                                                                                                                                                                                                                | Albertas Timinskas; Alma Gedvilaitė; Danguolė Ziogienė; Emilija Vasiliunaite; Milda Norkiene                                                                                                                                                                                                                                                                                                                                                                                                                                                                                                                                                                                                                                                                                                                                                                                                                                                                                                                                                                                                                                                                                                                                                                                                                                                                                                                                                                                                                                                                                                                                               |
| EPI_ISL_2885938, EPI_ISL_2885944, EPI_ISL_2885945, EPI_ISL_2885946                                                                                                                                                                                                                                                                                                                                                                                                                                                                                                                                                                                                                                                                                                                                                                                                                                                                                                                     | Viešoji įstaiga Vilniaus universiteto ligoninė Santaros klinikos                                                                 | Institute of Biotechnology, Life Sciences Center, Vilnius University                                                                                                                                                                                                                                                                                                                                                                                                                | Albertas Timinskas; Alma Gedvilaitė; Danguolė Ziogienė; Emilija Vasiliunaite; Milda Norkiene                                                                                                                                                                                                                                                                                                                                                                                                                                                                                                                                                                                                                                                                                                                                                                                                                                                                                                                                                                                                                                                                                                                                                                                                                                                                                                                                                                                                                                                                                                                                               |
| EPI_ISL_1914236, EPI_ISL_1914237, EPI_ISL_1914238, EPI_ISL_1914239                                                                                                                                                                                                                                                                                                                                                                                                                                                                                                                                                                                                                                                                                                                                                                                                                                                                                                                     | Viollier AG                                                                                                                      | Department of Biosystems Science and Engineering, ETH Zurich                                                                                                                                                                                                                                                                                                                                                                                                                        | Andrea Patrignani; Andrea Cabral de Gouvea; Catharine Aquino; Chaoran Chen; Christian Beisel; Christiane Beckmann; Christoph Noppen; David Dreifuss; Deborah Penet; Doris Popovic; Elodie Burcklen; Emmanouil Dermitzakis; Griffin White; Henri Pegeot; Ina Nissen; Ioannis Xenarios; Ivan Topolsky; Jay Tracy; Katharina Jahn; Keith Harshman; Lara Fuhrmann; Laura Neff; Lennart Opitz; Lorenzo Cerutti; Maria Domenica Mocchia; Maurice Redondo; Mirjam Feldkamp; Natascha Santacroce; Niko Beerenwinkel; Noemie Santamaria de Souza; Olivier Kobel; Philipp Jablonski; Ralph Schlapbach; Rebecca Denes; Sarah Nadeau; Simon Gruter; Sophie Seidel; Tanja Stadler; Timothy Sykes                                                                                                                                                                                                                                                                                                                                                                                                                                                                                                                                                                                                                                                                                                                                                                                                                                                                                                                                                        |
| EPI_ISL_1750690, EPI_ISL_2017208, EPI_ISL_2017223, EPI_ISL_2017224, EPI_ISL_2017225, EPI_ISL_2018995, EPI_ISL_2019465, EPI_ISL_2212778, EPI_ISL_2307592, EPI_ISL_2307932, EPI_ISL_2308031, EPI_ISL_2375015, EPI_ISL_2375080, EPI_ISL_2375122, EPI_ISL_2375177, EPI_ISL_2375211, EPI_ISL_2375282, EPI_ISL_2462656, EPI_ISL_2462658, EPI_ISL_2462835, EPI_ISL_2462851, EPI_ISL_2462855, EPI_ISL_2544326, EPI_ISL_2544338, EPI_ISL_2544374, EPI_ISL_2544422, EPI_ISL_2611051, EPI_ISL_2662307, EPI_ISL_2662356, EPI_ISL_2662390, EPI_ISL_2662428, EPI_ISL_2662433, EPI_ISL_2662435, EPI_ISL_2724835, EPI_ISL_2724389, EPI_ISL_2724446, EPI_ISL_2724449, EPI_ISL_2724454, EPI_ISL_2724455, EPI_ISL_2724509, EPI_ISL_2724510, EPI_ISL_2820562, EPI_ISL_2820583, EPI_ISL_2820585, EPI_ISL_2820600                                                                                                                                                                                            | Department of Biosystems Science and Engineering, ETH Zurich                                                                     | Andrea Patrignani; Andrea Patrizia Salzmann; Andrea Cabral de Gouvea; Catharine Aquino; Chaoran Chen; Christian Beisel; Christiane Beckmann; Christoph Noppen; Daniel Ehrsam; David Dreifuss; Deborah Penet; Doris Popovic; Elodie Burcklen; Emmanouil Dermitzakis; Griffin White; Henri Pegeot; Henriette Kúrth; Ina Nissen; Ioannis Xenarios; Isabel Stürmer; Jay Tracy; Katharina Jahn; Keith Harshman; Kim Philipp Jablonski; Lara Fuhrmann; Laura Neff; Lennart Opitz; Lorenzo |                                                                                                                                                                                                                                                                                                                                                                                                                                                                                                                                                                                                                                                                                                                                                                                                                                                                                                                                                                                                                                                                                                                                                                                                                                                                                                                                                                                                                                                                                                                                                                                                                                            |
| see above                                                                                                                                                                                                                                                                                                                                                                                                                                                                                                                                                                                                                                                                                                                                                                                                                                                                                                                                                                              | Viollier AG                                                                                                                      | Department of Biosystems Science and Engineering, ETH Zurich                                                                                                                                                                                                                                                                                                                                                                                                                        | Andrea Patrignani; Andrea Patrizia Salzmann; Andrea Cabral de Gouvea; Catharine Aquino; Chaoran Chen; Christian Beisel; Christiane Beckmann; Christoph Noppen; Daniel Ehrsam; David Dreifuss; Deborah Penet; Doris Popovic; Elodie Burcklen; Emmanouil Dermitzakis; Griffin White; Henri Pegeot; Henriette Kúrth; Ina Nissen; Ioannis Xenarios; Isabel Stürmer; Jay Tracy; Katharina Jahn; Keith Harshman; Kim Philipp Jablonski; Lara Fuhrmann; Laura Neff; Lennart Opitz; Lorenzo                                                                                                                                                                                                                                                                                                                                                                                                                                                                                                                                                                                                                                                                                                                                                                                                                                                                                                                                                                                                                                                                                                                                                        |

|                                                                                                                                                                                                                                                                                                                                                                                                                                                                                                                                                                                                                                                                                                                                                                                                                                                                                                                                                                                                                                                                                                                                                                                                                                                                                                                                                                                                                                                                                                                                                                                                                                                                                                                                                                                                                                                                                                                                                                                                                                                                                                                                                                                                                                                                                                                                                                                                                                                                                                                                                                                                                                                                                                                                                                                                                                                                                                                                                                                                                                                                                                                                                                                                                                                                                                                                                                                                                                                                                                                                                                                                                                                                                                                                                                                                                                                                                                                                                                                                                                                                                                                                                                                                                                                                                                                                                                                                                                                                                                                                                                                                                                                                                                                                                                                                                                                                                                                                                                                                                                                                                                                                                                                                                                                                                                                                                                                                                                                                                                                                                                                                                                                                                                                                                                                                                                                                                                                                                                                                                                                                                                                                                                                                                                                                                                                                                                                                                                                                                                                                                                                                                                                                                                                                                                                                                                                                                                                                                                                                                                                                                                                                                                                                                                                                                                                                                                                                                                                                                                                                                                                                                                                                                                                                                                                                                                                                                                                                                                                                                                                                                                                                                                                                                                                                                                                                                                                                                                                                                                                                                                                                                                                                                                                                                                                                                                                                                                                                                                                                                                                                                                                                                                                                                                                                                                                                                                                                                                                                                                                                                                                                                                                                                                                                                                                                                                                                                                                                                                                                                                                                                                                                                                                                                                                                                                                                                                                                                                                                                                                                                                                                                                                                                                                                                                                                                                                                                                                                                                                                                                                                                                                                                                                                                                                            |                                                                                                                         |                                                                                                                                                                                                                                                                                   |                                                                                                                                                                                                                                                                                                                                                                                                                         |
|------------------------------------------------------------------------------------------------------------------------------------------------------------------------------------------------------------------------------------------------------------------------------------------------------------------------------------------------------------------------------------------------------------------------------------------------------------------------------------------------------------------------------------------------------------------------------------------------------------------------------------------------------------------------------------------------------------------------------------------------------------------------------------------------------------------------------------------------------------------------------------------------------------------------------------------------------------------------------------------------------------------------------------------------------------------------------------------------------------------------------------------------------------------------------------------------------------------------------------------------------------------------------------------------------------------------------------------------------------------------------------------------------------------------------------------------------------------------------------------------------------------------------------------------------------------------------------------------------------------------------------------------------------------------------------------------------------------------------------------------------------------------------------------------------------------------------------------------------------------------------------------------------------------------------------------------------------------------------------------------------------------------------------------------------------------------------------------------------------------------------------------------------------------------------------------------------------------------------------------------------------------------------------------------------------------------------------------------------------------------------------------------------------------------------------------------------------------------------------------------------------------------------------------------------------------------------------------------------------------------------------------------------------------------------------------------------------------------------------------------------------------------------------------------------------------------------------------------------------------------------------------------------------------------------------------------------------------------------------------------------------------------------------------------------------------------------------------------------------------------------------------------------------------------------------------------------------------------------------------------------------------------------------------------------------------------------------------------------------------------------------------------------------------------------------------------------------------------------------------------------------------------------------------------------------------------------------------------------------------------------------------------------------------------------------------------------------------------------------------------------------------------------------------------------------------------------------------------------------------------------------------------------------------------------------------------------------------------------------------------------------------------------------------------------------------------------------------------------------------------------------------------------------------------------------------------------------------------------------------------------------------------------------------------------------------------------------------------------------------------------------------------------------------------------------------------------------------------------------------------------------------------------------------------------------------------------------------------------------------------------------------------------------------------------------------------------------------------------------------------------------------------------------------------------------------------------------------------------------------------------------------------------------------------------------------------------------------------------------------------------------------------------------------------------------------------------------------------------------------------------------------------------------------------------------------------------------------------------------------------------------------------------------------------------------------------------------------------------------------------------------------------------------------------------------------------------------------------------------------------------------------------------------------------------------------------------------------------------------------------------------------------------------------------------------------------------------------------------------------------------------------------------------------------------------------------------------------------------------------------------------------------------------------------------------------------------------------------------------------------------------------------------------------------------------------------------------------------------------------------------------------------------------------------------------------------------------------------------------------------------------------------------------------------------------------------------------------------------------------------------------------------------------------------------------------------------------------------------------------------------------------------------------------------------------------------------------------------------------------------------------------------------------------------------------------------------------------------------------------------------------------------------------------------------------------------------------------------------------------------------------------------------------------------------------------------------------------------------------------------------------------------------------------------------------------------------------------------------------------------------------------------------------------------------------------------------------------------------------------------------------------------------------------------------------------------------------------------------------------------------------------------------------------------------------------------------------------------------------------------------------------------------------------------------------------------------------------------------------------------------------------------------------------------------------------------------------------------------------------------------------------------------------------------------------------------------------------------------------------------------------------------------------------------------------------------------------------------------------------------------------------------------------------------------------------------------------------------------------------------------------------------------------------------------------------------------------------------------------------------------------------------------------------------------------------------------------------------------------------------------------------------------------------------------------------------------------------------------------------------------------------------------------------------------------------------------------------------------------------------------------------------------------------------------------------------------------------------------------------------------------------------------------------------------------------------------------------------------------------------------------------------------------------------------------------------------------------------------------------------------------------------------------------------------------------------------------------------------------------------------------------------------------------------------------------------------------------------------------------------------------------------------------------------------------------------------------------------------------------------------------------------------------------------------------------------------------------------------------------------------------------------------------------------------------------------------------------------------------------------------------------------------------------------------------------------------------------------------------------------------------------------------------------------------------------------------------------------------------------------------------------------------------------------------------------------------------------------------------------------------------------------------------------------------------------------------------------------------------------------------------------------------------------------------------------------------------------------------------------------------------------------------------------------------------------------------------------------------------------------------------------------------------------------------------------------------------------------------------------------------------------------------------------------------------------------------------------------------------------------------------------------------------------------------------------------------------------------------------------------------------------------------------------------------------------------------------------------------------------------------------------------------------------------------------------------------------------------------------------------------------------------------------------------------------------------------------------------------------------------------------------------------------------------------------------------------------------------------------------------------------|-------------------------------------------------------------------------------------------------------------------------|-----------------------------------------------------------------------------------------------------------------------------------------------------------------------------------------------------------------------------------------------------------------------------------|-------------------------------------------------------------------------------------------------------------------------------------------------------------------------------------------------------------------------------------------------------------------------------------------------------------------------------------------------------------------------------------------------------------------------|
|                                                                                                                                                                                                                                                                                                                                                                                                                                                                                                                                                                                                                                                                                                                                                                                                                                                                                                                                                                                                                                                                                                                                                                                                                                                                                                                                                                                                                                                                                                                                                                                                                                                                                                                                                                                                                                                                                                                                                                                                                                                                                                                                                                                                                                                                                                                                                                                                                                                                                                                                                                                                                                                                                                                                                                                                                                                                                                                                                                                                                                                                                                                                                                                                                                                                                                                                                                                                                                                                                                                                                                                                                                                                                                                                                                                                                                                                                                                                                                                                                                                                                                                                                                                                                                                                                                                                                                                                                                                                                                                                                                                                                                                                                                                                                                                                                                                                                                                                                                                                                                                                                                                                                                                                                                                                                                                                                                                                                                                                                                                                                                                                                                                                                                                                                                                                                                                                                                                                                                                                                                                                                                                                                                                                                                                                                                                                                                                                                                                                                                                                                                                                                                                                                                                                                                                                                                                                                                                                                                                                                                                                                                                                                                                                                                                                                                                                                                                                                                                                                                                                                                                                                                                                                                                                                                                                                                                                                                                                                                                                                                                                                                                                                                                                                                                                                                                                                                                                                                                                                                                                                                                                                                                                                                                                                                                                                                                                                                                                                                                                                                                                                                                                                                                                                                                                                                                                                                                                                                                                                                                                                                                                                                                                                                                                                                                                                                                                                                                                                                                                                                                                                                                                                                                                                                                                                                                                                                                                                                                                                                                                                                                                                                                                                                                                                                                                                                                                                                                                                                                                                                                                                                                                                                                                                                                            |                                                                                                                         | Cerutti; Maria Domenica Moccia; Maurice Redondo; Mirjam Feldkamp; Natascha Santacrose; Niko Beerenwinkel; Noemie Santamaria de Souza; Olivier Kobel; Philipp Jablonski; Ralph Schlachbach; Rebecca Denes; Sarah Nadeau; Simon Grüter; Sophie Seidel; Tanja Stadler; Timothy Sykes |                                                                                                                                                                                                                                                                                                                                                                                                                         |
| EPI_ISL_1200241, EPI_ISL_1200242                                                                                                                                                                                                                                                                                                                                                                                                                                                                                                                                                                                                                                                                                                                                                                                                                                                                                                                                                                                                                                                                                                                                                                                                                                                                                                                                                                                                                                                                                                                                                                                                                                                                                                                                                                                                                                                                                                                                                                                                                                                                                                                                                                                                                                                                                                                                                                                                                                                                                                                                                                                                                                                                                                                                                                                                                                                                                                                                                                                                                                                                                                                                                                                                                                                                                                                                                                                                                                                                                                                                                                                                                                                                                                                                                                                                                                                                                                                                                                                                                                                                                                                                                                                                                                                                                                                                                                                                                                                                                                                                                                                                                                                                                                                                                                                                                                                                                                                                                                                                                                                                                                                                                                                                                                                                                                                                                                                                                                                                                                                                                                                                                                                                                                                                                                                                                                                                                                                                                                                                                                                                                                                                                                                                                                                                                                                                                                                                                                                                                                                                                                                                                                                                                                                                                                                                                                                                                                                                                                                                                                                                                                                                                                                                                                                                                                                                                                                                                                                                                                                                                                                                                                                                                                                                                                                                                                                                                                                                                                                                                                                                                                                                                                                                                                                                                                                                                                                                                                                                                                                                                                                                                                                                                                                                                                                                                                                                                                                                                                                                                                                                                                                                                                                                                                                                                                                                                                                                                                                                                                                                                                                                                                                                                                                                                                                                                                                                                                                                                                                                                                                                                                                                                                                                                                                                                                                                                                                                                                                                                                                                                                                                                                                                                                                                                                                                                                                                                                                                                                                                                                                                                                                                                                                                                           | Viral Respiratory Infections Laboratory, Cantacuzino National Military-Medical Institute                                | Cantacuzino Institute Virology                                                                                                                                                                                                                                                    | Carmen Cherciu; Mihaela Lazar; Mihaela Oprea; Sorin Dinu                                                                                                                                                                                                                                                                                                                                                                |
| EPI_ISL_2135844                                                                                                                                                                                                                                                                                                                                                                                                                                                                                                                                                                                                                                                                                                                                                                                                                                                                                                                                                                                                                                                                                                                                                                                                                                                                                                                                                                                                                                                                                                                                                                                                                                                                                                                                                                                                                                                                                                                                                                                                                                                                                                                                                                                                                                                                                                                                                                                                                                                                                                                                                                                                                                                                                                                                                                                                                                                                                                                                                                                                                                                                                                                                                                                                                                                                                                                                                                                                                                                                                                                                                                                                                                                                                                                                                                                                                                                                                                                                                                                                                                                                                                                                                                                                                                                                                                                                                                                                                                                                                                                                                                                                                                                                                                                                                                                                                                                                                                                                                                                                                                                                                                                                                                                                                                                                                                                                                                                                                                                                                                                                                                                                                                                                                                                                                                                                                                                                                                                                                                                                                                                                                                                                                                                                                                                                                                                                                                                                                                                                                                                                                                                                                                                                                                                                                                                                                                                                                                                                                                                                                                                                                                                                                                                                                                                                                                                                                                                                                                                                                                                                                                                                                                                                                                                                                                                                                                                                                                                                                                                                                                                                                                                                                                                                                                                                                                                                                                                                                                                                                                                                                                                                                                                                                                                                                                                                                                                                                                                                                                                                                                                                                                                                                                                                                                                                                                                                                                                                                                                                                                                                                                                                                                                                                                                                                                                                                                                                                                                                                                                                                                                                                                                                                                                                                                                                                                                                                                                                                                                                                                                                                                                                                                                                                                                                                                                                                                                                                                                                                                                                                                                                                                                                                                                                                                            | Viral Respiratory Lab, National Institute for Biomedical Research (INRB)                                                | Pathogen Sequencing Lab, National Institute for Biomedical Research (INRB)                                                                                                                                                                                                        | Allison Black; Amuri Aziza; Andrew Rambaut; Catherine Pratt; Eddy Kinganda-Lusamaki; Edith Nkwembe; Emmanuel Lokilo Lofiko; Francisca Muyembe Mawete; Ian Goodfellow; James Hadfield; Jean Claude Makangara; Jean-Jacques Muyembe Tamfum; Josh Quick; Kristian Andersen; Matthias Pauthner; Michael Wiley; Nick Loman; Placide Mbala-Kingebeni; Steve Ahuka-Mundeki; Trevor Bedford                                     |
| EPI_ISL_2549198, EPI_ISL_2549199                                                                                                                                                                                                                                                                                                                                                                                                                                                                                                                                                                                                                                                                                                                                                                                                                                                                                                                                                                                                                                                                                                                                                                                                                                                                                                                                                                                                                                                                                                                                                                                                                                                                                                                                                                                                                                                                                                                                                                                                                                                                                                                                                                                                                                                                                                                                                                                                                                                                                                                                                                                                                                                                                                                                                                                                                                                                                                                                                                                                                                                                                                                                                                                                                                                                                                                                                                                                                                                                                                                                                                                                                                                                                                                                                                                                                                                                                                                                                                                                                                                                                                                                                                                                                                                                                                                                                                                                                                                                                                                                                                                                                                                                                                                                                                                                                                                                                                                                                                                                                                                                                                                                                                                                                                                                                                                                                                                                                                                                                                                                                                                                                                                                                                                                                                                                                                                                                                                                                                                                                                                                                                                                                                                                                                                                                                                                                                                                                                                                                                                                                                                                                                                                                                                                                                                                                                                                                                                                                                                                                                                                                                                                                                                                                                                                                                                                                                                                                                                                                                                                                                                                                                                                                                                                                                                                                                                                                                                                                                                                                                                                                                                                                                                                                                                                                                                                                                                                                                                                                                                                                                                                                                                                                                                                                                                                                                                                                                                                                                                                                                                                                                                                                                                                                                                                                                                                                                                                                                                                                                                                                                                                                                                                                                                                                                                                                                                                                                                                                                                                                                                                                                                                                                                                                                                                                                                                                                                                                                                                                                                                                                                                                                                                                                                                                                                                                                                                                                                                                                                                                                                                                                                                                                                                                           | Virology Department, Central Health Laboratory                                                                          | The Francis Crick Institute                                                                                                                                                                                                                                                       | Bahador BS; Crawford M; Daniels RS; Goldstone R; Harvey R; Manraj SS; Nicod J; Patel H; Ramuth M; Sonoro J                                                                                                                                                                                                                                                                                                              |
| EPI_ISL_2354628, EPI_ISL_2354633                                                                                                                                                                                                                                                                                                                                                                                                                                                                                                                                                                                                                                                                                                                                                                                                                                                                                                                                                                                                                                                                                                                                                                                                                                                                                                                                                                                                                                                                                                                                                                                                                                                                                                                                                                                                                                                                                                                                                                                                                                                                                                                                                                                                                                                                                                                                                                                                                                                                                                                                                                                                                                                                                                                                                                                                                                                                                                                                                                                                                                                                                                                                                                                                                                                                                                                                                                                                                                                                                                                                                                                                                                                                                                                                                                                                                                                                                                                                                                                                                                                                                                                                                                                                                                                                                                                                                                                                                                                                                                                                                                                                                                                                                                                                                                                                                                                                                                                                                                                                                                                                                                                                                                                                                                                                                                                                                                                                                                                                                                                                                                                                                                                                                                                                                                                                                                                                                                                                                                                                                                                                                                                                                                                                                                                                                                                                                                                                                                                                                                                                                                                                                                                                                                                                                                                                                                                                                                                                                                                                                                                                                                                                                                                                                                                                                                                                                                                                                                                                                                                                                                                                                                                                                                                                                                                                                                                                                                                                                                                                                                                                                                                                                                                                                                                                                                                                                                                                                                                                                                                                                                                                                                                                                                                                                                                                                                                                                                                                                                                                                                                                                                                                                                                                                                                                                                                                                                                                                                                                                                                                                                                                                                                                                                                                                                                                                                                                                                                                                                                                                                                                                                                                                                                                                                                                                                                                                                                                                                                                                                                                                                                                                                                                                                                                                                                                                                                                                                                                                                                                                                                                                                                                                                                                                           | Virology Department, Royal Infirmary of Edinburgh, NHS Lothian / School of Biological Sciences, University of Edinburgh | COVID-19 Genomics UK (COG-UK) Consortium                                                                                                                                                                                                                                          | Colquhoun R; Cotton S; Dewar R; Gallagher A; Hill V; Jackson B; Maloney D; McCrone JT; McHugh M; O'Toole Á; Rambaut A; Rooke S; Scher E; Templeton K; Yu X                                                                                                                                                                                                                                                              |
| EPI_ISL_2627360, EPI_ISL_2627362, EPI_ISL_2627363, EPI_ISL_2627365, EPI_ISL_2627367, EPI_ISL_2627368, EPI_ISL_2627369, EPI_ISL_2627370, EPI_ISL_2627372, EPI_ISL_2627373, EPI_ISL_2627374, EPI_ISL_2627375, EPI_ISL_2627376, EPI_ISL_2627377, EPI_ISL_2627378, EPI_ISL_2627379, EPI_ISL_2627380, EPI_ISL_2627381, EPI_ISL_2627382, EPI_ISL_2627383, EPI_ISL_2627384, EPI_ISL_2627385, EPI_ISL_2627386, EPI_ISL_2627387, EPI_ISL_2627390, EPI_ISL_2627391, EPI_ISL_2627392, EPI_ISL_2627393                                                                                                                                                                                                                                                                                                                                                                                                                                                                                                                                                                                                                                                                                                                                                                                                                                                                                                                                                                                                                                                                                                                                                                                                                                                                                                                                                                                                                                                                                                                                                                                                                                                                                                                                                                                                                                                                                                                                                                                                                                                                                                                                                                                                                                                                                                                                                                                                                                                                                                                                                                                                                                                                                                                                                                                                                                                                                                                                                                                                                                                                                                                                                                                                                                                                                                                                                                                                                                                                                                                                                                                                                                                                                                                                                                                                                                                                                                                                                                                                                                                                                                                                                                                                                                                                                                                                                                                                                                                                                                                                                                                                                                                                                                                                                                                                                                                                                                                                                                                                                                                                                                                                                                                                                                                                                                                                                                                                                                                                                                                                                                                                                                                                                                                                                                                                                                                                                                                                                                                                                                                                                                                                                                                                                                                                                                                                                                                                                                                                                                                                                                                                                                                                                                                                                                                                                                                                                                                                                                                                                                                                                                                                                                                                                                                                                                                                                                                                                                                                                                                                                                                                                                                                                                                                                                                                                                                                                                                                                                                                                                                                                                                                                                                                                                                                                                                                                                                                                                                                                                                                                                                                                                                                                                                                                                                                                                                                                                                                                                                                                                                                                                                                                                                                                                                                                                                                                                                                                                                                                                                                                                                                                                                                                                                                                                                                                                                                                                                                                                                                                                                                                                                                                                                                                                                                                                                                                                                                                                                                                                                                                                                                                                                                                                                                                                 |                                                                                                                         |                                                                                                                                                                                                                                                                                   |                                                                                                                                                                                                                                                                                                                                                                                                                         |
| see above                                                                                                                                                                                                                                                                                                                                                                                                                                                                                                                                                                                                                                                                                                                                                                                                                                                                                                                                                                                                                                                                                                                                                                                                                                                                                                                                                                                                                                                                                                                                                                                                                                                                                                                                                                                                                                                                                                                                                                                                                                                                                                                                                                                                                                                                                                                                                                                                                                                                                                                                                                                                                                                                                                                                                                                                                                                                                                                                                                                                                                                                                                                                                                                                                                                                                                                                                                                                                                                                                                                                                                                                                                                                                                                                                                                                                                                                                                                                                                                                                                                                                                                                                                                                                                                                                                                                                                                                                                                                                                                                                                                                                                                                                                                                                                                                                                                                                                                                                                                                                                                                                                                                                                                                                                                                                                                                                                                                                                                                                                                                                                                                                                                                                                                                                                                                                                                                                                                                                                                                                                                                                                                                                                                                                                                                                                                                                                                                                                                                                                                                                                                                                                                                                                                                                                                                                                                                                                                                                                                                                                                                                                                                                                                                                                                                                                                                                                                                                                                                                                                                                                                                                                                                                                                                                                                                                                                                                                                                                                                                                                                                                                                                                                                                                                                                                                                                                                                                                                                                                                                                                                                                                                                                                                                                                                                                                                                                                                                                                                                                                                                                                                                                                                                                                                                                                                                                                                                                                                                                                                                                                                                                                                                                                                                                                                                                                                                                                                                                                                                                                                                                                                                                                                                                                                                                                                                                                                                                                                                                                                                                                                                                                                                                                                                                                                                                                                                                                                                                                                                                                                                                                                                                                                                                                                                  | Virology Laboratory, International Centre for Diarrhoeal Disease Research, Bangladesh (ICDDR,B)                         | Virology Laboratory, International Centre for Diarrhoeal Disease Research, Bangladesh (ICDDR,B)                                                                                                                                                                                   | Md. Mahfuzur Rahman; Mohammad Enayet Hossain; Mohammed Ziaur Rahman; Mojinu Miah; Mustafizur Rahman; Rashedul Hasan                                                                                                                                                                                                                                                                                                     |
| EPI_ISL_1970571, EPI_ISL_1970572, EPI_ISL_2081229, EPI_ISL_2884494, EPI_ISL_2884627, EPI_ISL_2884629                                                                                                                                                                                                                                                                                                                                                                                                                                                                                                                                                                                                                                                                                                                                                                                                                                                                                                                                                                                                                                                                                                                                                                                                                                                                                                                                                                                                                                                                                                                                                                                                                                                                                                                                                                                                                                                                                                                                                                                                                                                                                                                                                                                                                                                                                                                                                                                                                                                                                                                                                                                                                                                                                                                                                                                                                                                                                                                                                                                                                                                                                                                                                                                                                                                                                                                                                                                                                                                                                                                                                                                                                                                                                                                                                                                                                                                                                                                                                                                                                                                                                                                                                                                                                                                                                                                                                                                                                                                                                                                                                                                                                                                                                                                                                                                                                                                                                                                                                                                                                                                                                                                                                                                                                                                                                                                                                                                                                                                                                                                                                                                                                                                                                                                                                                                                                                                                                                                                                                                                                                                                                                                                                                                                                                                                                                                                                                                                                                                                                                                                                                                                                                                                                                                                                                                                                                                                                                                                                                                                                                                                                                                                                                                                                                                                                                                                                                                                                                                                                                                                                                                                                                                                                                                                                                                                                                                                                                                                                                                                                                                                                                                                                                                                                                                                                                                                                                                                                                                                                                                                                                                                                                                                                                                                                                                                                                                                                                                                                                                                                                                                                                                                                                                                                                                                                                                                                                                                                                                                                                                                                                                                                                                                                                                                                                                                                                                                                                                                                                                                                                                                                                                                                                                                                                                                                                                                                                                                                                                                                                                                                                                                                                                                                                                                                                                                                                                                                                                                                                                                                                                                                                                                                       | Virology Laboratory, Scientific Department, Army Medical Center                                                         | Virology Laboratory, Scientific Department, Army Medical Center                                                                                                                                                                                                                   | Anella Monte; Anna Anselmo; Antonella Fortunato; Filippo Molinari; Florigio Lista; Francesco Giordani; Giancarlo Petralito; Glandomenico Cerreto; Giulia Campoli; Lucia Nicosia; Marzia Cavalli; Riccardo De Sanctis; Rossella Brandi; Silvia Fillo; Stella Lia Vanessa Vera Fain                                                                                                                                       |
| EPI_ISL_2501060, EPI_ISL_2608428, EPI_ISL_2608429, EPI_ISL_2608440, EPI_ISL_2693911, EPI_ISL_2693913, EPI_ISL_2693914, EPI_ISL_2693915, EPI_ISL_2693919, EPI_ISL_2693920, EPI_ISL_2693921, EPI_ISL_2693926, EPI_ISL_2693936, EPI_ISL_2693937, EPI_ISL_2693938, EPI_ISL_2693942, EPI_ISL_2801922, EPI_ISL_2801923                                                                                                                                                                                                                                                                                                                                                                                                                                                                                                                                                                                                                                                                                                                                                                                                                                                                                                                                                                                                                                                                                                                                                                                                                                                                                                                                                                                                                                                                                                                                                                                                                                                                                                                                                                                                                                                                                                                                                                                                                                                                                                                                                                                                                                                                                                                                                                                                                                                                                                                                                                                                                                                                                                                                                                                                                                                                                                                                                                                                                                                                                                                                                                                                                                                                                                                                                                                                                                                                                                                                                                                                                                                                                                                                                                                                                                                                                                                                                                                                                                                                                                                                                                                                                                                                                                                                                                                                                                                                                                                                                                                                                                                                                                                                                                                                                                                                                                                                                                                                                                                                                                                                                                                                                                                                                                                                                                                                                                                                                                                                                                                                                                                                                                                                                                                                                                                                                                                                                                                                                                                                                                                                                                                                                                                                                                                                                                                                                                                                                                                                                                                                                                                                                                                                                                                                                                                                                                                                                                                                                                                                                                                                                                                                                                                                                                                                                                                                                                                                                                                                                                                                                                                                                                                                                                                                                                                                                                                                                                                                                                                                                                                                                                                                                                                                                                                                                                                                                                                                                                                                                                                                                                                                                                                                                                                                                                                                                                                                                                                                                                                                                                                                                                                                                                                                                                                                                                                                                                                                                                                                                                                                                                                                                                                                                                                                                                                                                                                                                                                                                                                                                                                                                                                                                                                                                                                                                                                                                                                                                                                                                                                                                                                                                                                                                                                                                                                                                                                                           |                                                                                                                         |                                                                                                                                                                                                                                                                                   |                                                                                                                                                                                                                                                                                                                                                                                                                         |
| see above                                                                                                                                                                                                                                                                                                                                                                                                                                                                                                                                                                                                                                                                                                                                                                                                                                                                                                                                                                                                                                                                                                                                                                                                                                                                                                                                                                                                                                                                                                                                                                                                                                                                                                                                                                                                                                                                                                                                                                                                                                                                                                                                                                                                                                                                                                                                                                                                                                                                                                                                                                                                                                                                                                                                                                                                                                                                                                                                                                                                                                                                                                                                                                                                                                                                                                                                                                                                                                                                                                                                                                                                                                                                                                                                                                                                                                                                                                                                                                                                                                                                                                                                                                                                                                                                                                                                                                                                                                                                                                                                                                                                                                                                                                                                                                                                                                                                                                                                                                                                                                                                                                                                                                                                                                                                                                                                                                                                                                                                                                                                                                                                                                                                                                                                                                                                                                                                                                                                                                                                                                                                                                                                                                                                                                                                                                                                                                                                                                                                                                                                                                                                                                                                                                                                                                                                                                                                                                                                                                                                                                                                                                                                                                                                                                                                                                                                                                                                                                                                                                                                                                                                                                                                                                                                                                                                                                                                                                                                                                                                                                                                                                                                                                                                                                                                                                                                                                                                                                                                                                                                                                                                                                                                                                                                                                                                                                                                                                                                                                                                                                                                                                                                                                                                                                                                                                                                                                                                                                                                                                                                                                                                                                                                                                                                                                                                                                                                                                                                                                                                                                                                                                                                                                                                                                                                                                                                                                                                                                                                                                                                                                                                                                                                                                                                                                                                                                                                                                                                                                                                                                                                                                                                                                                                                                                  | Virology Unit, Institut Pasteur du Cambodge                                                                             | Virology Unit, Institut Pasteur du Cambodge                                                                                                                                                                                                                                       | Cecile Troupin; Chau Darapheak; Chin Savuth; Erik A Karlsson; Jurre Y Siegers; Kraing Sidonn; Leakhena Pum; Ly Sovann; Veasna Duong; Yi Sengdoeurn                                                                                                                                                                                                                                                                      |
| EPI_ISL_2363818, EPI_ISL_2363821, EPI_ISL_2508228, EPI_ISL_2645129                                                                                                                                                                                                                                                                                                                                                                                                                                                                                                                                                                                                                                                                                                                                                                                                                                                                                                                                                                                                                                                                                                                                                                                                                                                                                                                                                                                                                                                                                                                                                                                                                                                                                                                                                                                                                                                                                                                                                                                                                                                                                                                                                                                                                                                                                                                                                                                                                                                                                                                                                                                                                                                                                                                                                                                                                                                                                                                                                                                                                                                                                                                                                                                                                                                                                                                                                                                                                                                                                                                                                                                                                                                                                                                                                                                                                                                                                                                                                                                                                                                                                                                                                                                                                                                                                                                                                                                                                                                                                                                                                                                                                                                                                                                                                                                                                                                                                                                                                                                                                                                                                                                                                                                                                                                                                                                                                                                                                                                                                                                                                                                                                                                                                                                                                                                                                                                                                                                                                                                                                                                                                                                                                                                                                                                                                                                                                                                                                                                                                                                                                                                                                                                                                                                                                                                                                                                                                                                                                                                                                                                                                                                                                                                                                                                                                                                                                                                                                                                                                                                                                                                                                                                                                                                                                                                                                                                                                                                                                                                                                                                                                                                                                                                                                                                                                                                                                                                                                                                                                                                                                                                                                                                                                                                                                                                                                                                                                                                                                                                                                                                                                                                                                                                                                                                                                                                                                                                                                                                                                                                                                                                                                                                                                                                                                                                                                                                                                                                                                                                                                                                                                                                                                                                                                                                                                                                                                                                                                                                                                                                                                                                                                                                                                                                                                                                                                                                                                                                                                                                                                                                                                                                                                                                         | Vita Laboratoriöt Oy                                                                                                    | Expert Microbiology, National Institute for Health and Welfare                                                                                                                                                                                                                    | Carita Savolainen-Kopra; Erika Lindh; Haider al-Hello; Jani Hakilahti; Kirsi Liitsola; Niina Ikonen; Olli Vapalahti; Pekka Ellonen; Phuoc Truong; Päivi Laurila; Ravi Kant; Sari Hannula; Soile Blomqvist; Teemu Smura                                                                                                                                                                                                  |
| EPI_ISL_2444966, EPI_ISL_2503925                                                                                                                                                                                                                                                                                                                                                                                                                                                                                                                                                                                                                                                                                                                                                                                                                                                                                                                                                                                                                                                                                                                                                                                                                                                                                                                                                                                                                                                                                                                                                                                                                                                                                                                                                                                                                                                                                                                                                                                                                                                                                                                                                                                                                                                                                                                                                                                                                                                                                                                                                                                                                                                                                                                                                                                                                                                                                                                                                                                                                                                                                                                                                                                                                                                                                                                                                                                                                                                                                                                                                                                                                                                                                                                                                                                                                                                                                                                                                                                                                                                                                                                                                                                                                                                                                                                                                                                                                                                                                                                                                                                                                                                                                                                                                                                                                                                                                                                                                                                                                                                                                                                                                                                                                                                                                                                                                                                                                                                                                                                                                                                                                                                                                                                                                                                                                                                                                                                                                                                                                                                                                                                                                                                                                                                                                                                                                                                                                                                                                                                                                                                                                                                                                                                                                                                                                                                                                                                                                                                                                                                                                                                                                                                                                                                                                                                                                                                                                                                                                                                                                                                                                                                                                                                                                                                                                                                                                                                                                                                                                                                                                                                                                                                                                                                                                                                                                                                                                                                                                                                                                                                                                                                                                                                                                                                                                                                                                                                                                                                                                                                                                                                                                                                                                                                                                                                                                                                                                                                                                                                                                                                                                                                                                                                                                                                                                                                                                                                                                                                                                                                                                                                                                                                                                                                                                                                                                                                                                                                                                                                                                                                                                                                                                                                                                                                                                                                                                                                                                                                                                                                                                                                                                                                                                           | Vitomed Sp. z o.o.                                                                                                      | 1. Academic Center for Pathomorphological and Genetic-Molecular Diagnostics ltd, Bialystok, Poland 2. National Institute of Public Health - National Institute of Hygiene, Warsaw, Poland                                                                                         | Anetta Sulewska; Jacek Nikliński; Janusz Dzięcioł; Joanna Kiśluk; Katarzyna Zacharczuk; Konrad Raczkowski; Magdalena Nowakowska; Małgorzata Sadkowska-Todys; Piotr Karabowicz; Piotr Majewski; Przemysław Bieчек. Joanna Reszeć; Radosław Charkiewicz; Tomasz Wolkowicz                                                                                                                                                 |
| EPI_ISL_2836955                                                                                                                                                                                                                                                                                                                                                                                                                                                                                                                                                                                                                                                                                                                                                                                                                                                                                                                                                                                                                                                                                                                                                                                                                                                                                                                                                                                                                                                                                                                                                                                                                                                                                                                                                                                                                                                                                                                                                                                                                                                                                                                                                                                                                                                                                                                                                                                                                                                                                                                                                                                                                                                                                                                                                                                                                                                                                                                                                                                                                                                                                                                                                                                                                                                                                                                                                                                                                                                                                                                                                                                                                                                                                                                                                                                                                                                                                                                                                                                                                                                                                                                                                                                                                                                                                                                                                                                                                                                                                                                                                                                                                                                                                                                                                                                                                                                                                                                                                                                                                                                                                                                                                                                                                                                                                                                                                                                                                                                                                                                                                                                                                                                                                                                                                                                                                                                                                                                                                                                                                                                                                                                                                                                                                                                                                                                                                                                                                                                                                                                                                                                                                                                                                                                                                                                                                                                                                                                                                                                                                                                                                                                                                                                                                                                                                                                                                                                                                                                                                                                                                                                                                                                                                                                                                                                                                                                                                                                                                                                                                                                                                                                                                                                                                                                                                                                                                                                                                                                                                                                                                                                                                                                                                                                                                                                                                                                                                                                                                                                                                                                                                                                                                                                                                                                                                                                                                                                                                                                                                                                                                                                                                                                                                                                                                                                                                                                                                                                                                                                                                                                                                                                                                                                                                                                                                                                                                                                                                                                                                                                                                                                                                                                                                                                                                                                                                                                                                                                                                                                                                                                                                                                                                                                                                                            | WACCBIP, University of Ghana, Accra, Ghana                                                                              | WACCBIP, University of Ghana, Volta Road, Legon-Accra, Ghana                                                                                                                                                                                                                      | Collins M. Morang'a; Dominic S.Y. Amuzu; Evelyn B. Quansah; Evelyn Y. Bonney; Frederick Tei-Maya; Ivy A. Asante; Joe K. Mutungi; John K. Odoom; Joseph H.K. Bonney; Joyce M. Ngoi; Lawrence Ofori-Boadu; Lucas N. Amenga-Etego and Gordon A. Awandare; Mildred Adusei-Poku; Nicaise T. Ndam; Peter K Quashie; Philip M. Soglo; Samirah Saiid; Vincent Appiah; Violette V. M'cornack; William K. Ampofo; Yaw Bediako     |
| EPI_ISL_1789541, EPI_ISL_1789542, EPI_ISL_2385077, EPI_ISL_2385081, EPI_ISL_2385085, EPI_ISL_2385090, EPI_ISL_2385091, EPI_ISL_2385095, EPI_ISL_2385096, EPI_ISL_2385101, EPI_ISL_2385113, EPI_ISL_2385114, EPI_ISL_2385116, EPI_ISL_2385119, EPI_ISL_2385123, EPI_ISL_2385125, EPI_ISL_2385129, EPI_ISL_2385138, EPI_ISL_2385142, EPI_ISL_2385143, EPI_ISL_2385144, EPI_ISL_2385145, EPI_ISL_2385146, EPI_ISL_2385147, EPI_ISL_2385148, EPI_ISL_2385149, EPI_ISL_2385152, EPI_ISL_2385158, EPI_ISL_2385159, EPI_ISL_2385162, EPI_ISL_2385163, EPI_ISL_2385165, EPI_ISL_2385167, EPI_ISL_2385169, EPI_ISL_2385170, EPI_ISL_2385172, EPI_ISL_2385173, EPI_ISL_2385174, EPI_ISL_2385175, EPI_ISL_2385176, EPI_ISL_2385178, EPI_ISL_2385179, EPI_ISL_2385184, EPI_ISL_2385185, EPI_ISL_2385188, EPI_ISL_2385189, EPI_ISL_2385193, EPI_ISL_2385195, EPI_ISL_2385204, EPI_ISL_2385206, EPI_ISL_2385311, EPI_ISL_2385319, EPI_ISL_2385323, EPI_ISL_2385324, EPI_ISL_2450462, EPI_ISL_2450465, EPI_ISL_2450466, EPI_ISL_2450479, EPI_ISL_2450489, EPI_ISL_2450499, EPI_ISL_2450503, EPI_ISL_2450508, EPI_ISL_2450510, EPI_ISL_2450521, EPI_ISL_2450525, EPI_ISL_2450526, EPI_ISL_2450527, EPI_ISL_2450530, EPI_ISL_2450535, EPI_ISL_2450536, EPI_ISL_2450538, EPI_ISL_2450540, EPI_ISL_2450542, EPI_ISL_2450543, EPI_ISL_2450544, EPI_ISL_2450545, EPI_ISL_2450546, EPI_ISL_2450547, EPI_ISL_2450548, EPI_ISL_2450549, EPI_ISL_2450550, EPI_ISL_2450551, EPI_ISL_2450552, EPI_ISL_2450553, EPI_ISL_2450554, EPI_ISL_2450555, EPI_ISL_2450556, EPI_ISL_2450557, EPI_ISL_2450558, EPI_ISL_2450559, EPI_ISL_2450560, EPI_ISL_2450561, EPI_ISL_2450562, EPI_ISL_2450563, EPI_ISL_2450564, EPI_ISL_2450565, EPI_ISL_2450566, EPI_ISL_2450567, EPI_ISL_2450568, EPI_ISL_2450569, EPI_ISL_2450570, EPI_ISL_2450571, EPI_ISL_2450572, EPI_ISL_2450573, EPI_ISL_2450574, EPI_ISL_2450575, EPI_ISL_2450576, EPI_ISL_2450577, EPI_ISL_2450578, EPI_ISL_2450579, EPI_ISL_2450580, EPI_ISL_2450581, EPI_ISL_2450582, EPI_ISL_2450583, EPI_ISL_2450584, EPI_ISL_2450585, EPI_ISL_2450586, EPI_ISL_2450587, EPI_ISL_2450588, EPI_ISL_2450589, EPI_ISL_2450590, EPI_ISL_2450591, EPI_ISL_2450592, EPI_ISL_2450593, EPI_ISL_2450594, EPI_ISL_2450595, EPI_ISL_2450596, EPI_ISL_2450597, EPI_ISL_2450598, EPI_ISL_2450599, EPI_ISL_2450600, EPI_ISL_2450601, EPI_ISL_2450602, EPI_ISL_2450603, EPI_ISL_2450604, EPI_ISL_2462879, EPI_ISL_2523389, EPI_ISL_2523406, EPI_ISL_2523444, EPI_ISL_2523469, EPI_ISL_2523480, EPI_ISL_2523503, EPI_ISL_2523516, EPI_ISL_2523522, EPI_ISL_2523549, EPI_ISL_2523559, EPI_ISL_2523568, EPI_ISL_2523678, EPI_ISL_2523738, EPI_ISL_2523747, EPI_ISL_2523762, EPI_ISL_2523768, EPI_ISL_2523783, EPI_ISL_2523789, EPI_ISL_2523794, EPI_ISL_2523799, EPI_ISL_2523804, EPI_ISL_2523809, EPI_ISL_2523814, EPI_ISL_2523819, EPI_ISL_2523824, EPI_ISL_2523829, EPI_ISL_2523834, EPI_ISL_2523839, EPI_ISL_2523844, EPI_ISL_2523849, EPI_ISL_2523854, EPI_ISL_2523859, EPI_ISL_2523864, EPI_ISL_2523869, EPI_ISL_2523874, EPI_ISL_2523879, EPI_ISL_2523884, EPI_ISL_2523889, EPI_ISL_2523894, EPI_ISL_2523899, EPI_ISL_2523904, EPI_ISL_2523909, EPI_ISL_2523914, EPI_ISL_2523919, EPI_ISL_2523924, EPI_ISL_2523929, EPI_ISL_2523934, EPI_ISL_2523939, EPI_ISL_2523944, EPI_ISL_2523949, EPI_ISL_2523954, EPI_ISL_2523959, EPI_ISL_2523964, EPI_ISL_2523969, EPI_ISL_2523974, EPI_ISL_2523979, EPI_ISL_2523984, EPI_ISL_2523989, EPI_ISL_2523994, EPI_ISL_2523999, EPI_ISL_2524004, EPI_ISL_2524009, EPI_ISL_2524014, EPI_ISL_2524019, EPI_ISL_2524024, EPI_ISL_2524029, EPI_ISL_2524034, EPI_ISL_2524039, EPI_ISL_2524044, EPI_ISL_2524049, EPI_ISL_2524054, EPI_ISL_2524059, EPI_ISL_2524064, EPI_ISL_2524069, EPI_ISL_2524074, EPI_ISL_2524079, EPI_ISL_2524084, EPI_ISL_2524089, EPI_ISL_2524094, EPI_ISL_2524099, EPI_ISL_2524104, EPI_ISL_2524109, EPI_ISL_2524114, EPI_ISL_2524119, EPI_ISL_2524124, EPI_ISL_2524129, EPI_ISL_2524134, EPI_ISL_2524139, EPI_ISL_2524144, EPI_ISL_2524149, EPI_ISL_2524154, EPI_ISL_2524159, EPI_ISL_2524164, EPI_ISL_2524169, EPI_ISL_2524174, EPI_ISL_2524179, EPI_ISL_2524184, EPI_ISL_2524189, EPI_ISL_2524194, EPI_ISL_2524199, EPI_ISL_2524204, EPI_ISL_2524209, EPI_ISL_2524214, EPI_ISL_2524219, EPI_ISL_2524224, EPI_ISL_2524229, EPI_ISL_2524234, EPI_ISL_2524239, EPI_ISL_2524244, EPI_ISL_2524249, EPI_ISL_2524254, EPI_ISL_2524259, EPI_ISL_2524264, EPI_ISL_2524269, EPI_ISL_2524274, EPI_ISL_2524279, EPI_ISL_2524284, EPI_ISL_2524289, EPI_ISL_2524294, EPI_ISL_2524299, EPI_ISL_2524304, EPI_ISL_2524309, EPI_ISL_2524314, EPI_ISL_2524319, EPI_ISL_2524324, EPI_ISL_2524329, EPI_ISL_2524334, EPI_ISL_2524339, EPI_ISL_2524344, EPI_ISL_2524349, EPI_ISL_2524354, EPI_ISL_2524359, EPI_ISL_2524364, EPI_ISL_2524369, EPI_ISL_2524374, EPI_ISL_2524379, EPI_ISL_2524384, EPI_ISL_2524389, EPI_ISL_2524394, EPI_ISL_2524399, EPI_ISL_2524404, EPI_ISL_2524409, EPI_ISL_2524414, EPI_ISL_2524419, EPI_ISL_2524424, EPI_ISL_2524429, EPI_ISL_2524434, EPI_ISL_2524439, EPI_ISL_2524444, EPI_ISL_2524449, EPI_ISL_2524454, EPI_ISL_2524459, EPI_ISL_2524464, EPI_ISL_2524469, EPI_ISL_2524474, EPI_ISL_2524479, EPI_ISL_2524484, EPI_ISL_2524489, EPI_ISL_2524494, EPI_ISL_2524499, EPI_ISL_2524504, EPI_ISL_2524509, EPI_ISL_2524514, EPI_ISL_2524519, EPI_ISL_2524524, EPI_ISL_2524529, EPI_ISL_2524534, EPI_ISL_2524539, EPI_ISL_2524544, EPI_ISL_2524549, EPI_ISL_2524554, EPI_ISL_2524559, EPI_ISL_2524564, EPI_ISL_2524569, EPI_ISL_2524574, EPI_ISL_2524579, EPI_ISL_2524584, EPI_ISL_2524589, EPI_ISL_2524594, EPI_ISL_2524599, EPI_ISL_2524604, EPI_ISL_2524609, EPI_ISL_2524614, EPI_ISL_2524619, EPI_ISL_2524624, EPI_ISL_2524629, EPI_ISL_2524634, EPI_ISL_2524639, EPI_ISL_2524644, EPI_ISL_2524649, EPI_ISL_2524654, EPI_ISL_2524659, EPI_ISL_2524664, EPI_ISL_2524669, EPI_ISL_2524674, EPI_ISL_2524679, EPI_ISL_2524684, EPI_ISL_2524689, EPI_ISL_2524694, EPI_ISL_2524699, EPI_ISL_2524704, EPI_ISL_2524709, EPI_ISL_2524714, EPI_ISL_2524719, EPI_ISL_2524724, EPI_ISL_2524729, EPI_ISL_2524734, EPI_ISL_2524739, EPI_ISL_2524744, EPI_ISL_2524749, EPI_ISL_2524754, EPI_ISL_2524759, EPI_ISL_2524764, EPI_ISL_2524769, EPI_ISL_2524774, EPI_ISL_2524779, EPI_ISL_2524784, EPI_ISL_2524789, EPI_ISL_2524794, EPI_ISL_2524799, EPI_ISL_2524804, EPI_ISL_2524809, EPI_ISL_2524814, EPI_ISL_2524819, EPI_ISL_2524824, EPI_ISL_2524829, EPI_ISL_2524834, EPI_ISL_2524839, EPI_ISL_2524844, EPI_ISL_2524849, EPI_ISL_2524854, EPI_ISL_2524859, EPI_ISL_2524864, EPI_ISL_2524869, EPI_ISL_2524874, EPI_ISL_2524879, EPI_ISL_2524884, EPI_ISL_2524889, EPI_ISL_2524894, EPI_ISL_2524899, EPI_ISL_2524904, EPI_ISL_2524909, EPI_ISL_2524914, EPI_ISL_2524919, EPI_ISL_2524924, EPI_ISL_2524929, EPI_ISL_2524934, EPI_ISL_2524939, EPI_ISL_2524944, EPI_ISL_2524949, EPI_ISL_2524954, EPI_ISL_2524959, EPI_ISL_2524964, EPI_ISL_2524969, EPI_ISL_2524974, EPI_ISL_2524979, EPI_ISL_2524984, EPI_ISL_2524989, EPI_ISL_2524994, EPI_ISL_2524999, EPI_ISL_2525004, EPI_ISL_2525009, EPI_ISL_2525014, EPI_ISL_2525019, EPI_ISL_2525024, EPI_ISL_2525029, EPI_ISL_2525034, EPI_ISL_2525039, EPI_ISL_2525044, EPI_ISL_2525049, EPI_ISL_2525054, EPI_ISL_2525059, EPI_ISL_2525064, EPI_ISL_2525069, EPI_ISL_2525074, EPI_ISL_2525079, EPI_ISL_2525084, EPI_ISL_2525089, EPI_ISL_2525094, EPI_ISL_2525099, EPI_ISL_2525104, EPI_ISL_2525109, EPI_ISL_2525114, EPI_ISL_2525119, EPI_ISL_2525124, EPI_ISL_2525129, EPI_ISL_2525134, EPI_ISL_2525139, EPI_ISL_2525144, EPI_ISL_2525149, EPI_ISL_2525154, EPI_ISL_2525159, EPI_ISL_2525164, EPI_ISL_2525169, EPI_ISL_2525174, EPI_ISL_2525179, EPI_ISL_2525184, EPI_ISL_2525189, EPI_ISL_2525194, EPI_ISL_2525199, EPI_ISL_2525204, EPI_ISL_2525209, EPI_ISL_2525214, EPI_ISL_2525219, EPI_ISL_2525224, EPI_ISL_2525229, EPI_ISL_2525234, EPI_ISL_2525239, EPI_ISL_2525244, EPI_ISL_2525249, EPI_ISL_2525254, EPI_ISL_2525259, EPI_ISL_2525264, EPI_ISL_2525269, EPI_ISL_2525274, EPI_ISL_2525279, EPI_ISL_2525284, EPI_ISL_2525289, EPI_ISL_2525294, EPI_ISL_2525299, EPI_ISL_2525304, EPI_ISL_2525309, EPI_ISL_2525314, EPI_ISL_2525319, EPI_ISL_2525324, EPI_ISL_2525329, EPI_ISL_2525334, EPI_ISL_2525339, EPI_ISL_2525344, EPI_ISL_2525349, EPI_ISL_2525354, EPI_ISL_2525359, EPI_ISL_2525364, EPI_ISL_2525369, EPI_ISL_2525374, EPI_ISL_2525379, EPI_ISL_2525384, EPI_ISL_2525389, EPI_ISL_2525394, EPI_ISL_2525399, EPI_ISL_2525404, EPI_ISL_2525409, EPI_ISL_2525414, EPI_ISL_2525419, EPI_ISL_2525424, EPI_ISL_2525429, EPI_ISL_2525434, EPI_ISL_2525439, EPI_ISL_2525444, EPI_ISL_2525449, EPI_ISL_2525454, EPI_ISL_2525459, EPI_ISL_2525464, EPI_ISL_2525469, EPI_ISL_2525474, EPI_ISL_2525479, EPI_ISL_2525484, EPI_ISL_2525489, EPI_ISL_2525494, EPI_ISL_2525499, EPI_ISL_2525504, EPI_ISL_2525509, EPI_ISL_2525514, EPI_ISL_2525519, EPI_ISL_2525524, EPI_ISL_2525529, EPI_ISL_2525534, EPI_ISL_2525539, EPI_ISL_2525544, EPI_ISL_2525549, EPI_ISL_2525554, EPI_ISL_2525559, EPI_ISL_2525564, EPI_ISL_2525569, EPI_ISL_2525574, EPI_ISL_2525579, EPI_ISL_2525584, EPI_ISL_2525589, EPI_ISL_2525594, EPI_ISL_2525599, EPI_ISL_2525604, EPI_ISL_2525609, EPI_ISL_2525614, EPI_ISL_2525619, EPI_ISL_2525624, EPI_ISL_2525629, EPI_ISL_2525634, EPI_ISL_2525639, EPI_ISL_2525644, EPI_ISL_2525649, EPI_ISL_2525654, EPI_ISL_2525659, EPI_ISL_2525664, EPI_ISL_2525669, EPI_ISL_2525674, EPI_ISL_2525679, EPI_ISL_2525684, EPI_ISL_2525689, EPI_ISL_2525694, EPI_ISL_2525699, EPI_ISL_2525704, EPI_ISL_2525709, EPI_ISL_2525714, EPI_ISL_2525719, EPI_ISL_2525724, EPI_ISL_2525729, EPI_ISL_2525734, EPI_ISL_2525739, EPI_ISL_2525744, EPI_ISL_2525749, EPI_ISL_2525754, EPI_ISL_2525759, EPI_ISL_2525764, EPI_ISL_2525769, EPI_ISL_2525774, EPI_ISL_2525779, EPI_ISL_2525784, EPI_ISL_2525789, EPI_ISL_2525794, EPI_ISL_2525799, EPI_ISL_2525804, EPI_ISL_2525809, EPI_ISL_2525814, EPI_ISL_2525819, EPI_ISL_2525824, EPI_ISL_2525829, EPI_ISL_2525834, EPI_ISL_2525839, EPI_ISL_2525844, EPI_ISL_2525849, EPI_ISL_2525854, EPI_ISL_2525859, EPI_ISL_2525864, EPI_ISL_2525869, EPI_ISL_2525874, EPI_ISL_2525879, EPI_ISL_2525884, EPI_ISL_2525889, EPI_ISL_2525894, EPI_ISL_2525899, EPI_ISL_2525904, EPI_ISL_2525909, EPI_ISL_2525914, EPI_ISL_2525919, EPI_ISL_2525924, EPI_ISL_2525929, EPI_ISL_2525934, EPI_ISL_2525939, EPI_ISL_2525944, EPI_ISL_2525949, EPI_ISL_2525954, EPI_ISL_2525959, EPI_ISL_2525964, EPI_ISL_2525969, EPI_ISL_2525974, EPI_ISL_2525979, EPI_ISL_2525984, EPI_ISL_2525989, EPI_ISL_2525994, EPI_ISL_2525999, EPI_ISL_2526004, EPI_ISL_2526009, EPI_ISL_2526014, EPI_ISL_2526019, EPI_ISL_2526024, EPI_ISL_2526029, EPI_ISL_2526034, EPI_ISL_2526039, EPI_ISL_2526044, EPI_ISL_2526049, EPI_ISL_2526054, EPI_ISL_2526059, EPI_ISL_2526064, EPI_ISL_2526069, EPI_ISL_2526074, EPI_ISL_2526079, EPI_ISL_2526084, EPI_ISL_2526089, EPI_ISL_2526094, EPI_ISL_2526099, EPI_ISL_2526104, EPI_ISL_2526109, EPI_ISL_2526114, EPI_ISL_2526119, EPI_ISL_2526124, EPI_ISL_2526129, EPI_ISL_2526134, EPI_ISL_2526139, EPI_ISL_2526144, EPI_ISL_2526149, EPI_ISL_2526154, EPI_ISL_2526159, EPI_ISL_2526164, EPI_ISL_2526169, EPI_ISL_2526174, EPI_ISL_2526179, EPI_ISL_2526184, EPI_ISL_2526189, EPI_ISL_2526194, EPI_ISL_2526199 |                                                                                                                         |                                                                                                                                                                                                                                                                                   |                                                                                                                                                                                                                                                                                                                                                                                                                         |
| see above                                                                                                                                                                                                                                                                                                                                                                                                                                                                                                                                                                                                                                                                                                                                                                                                                                                                                                                                                                                                                                                                                                                                                                                                                                                                                                                                                                                                                                                                                                                                                                                                                                                                                                                                                                                                                                                                                                                                                                                                                                                                                                                                                                                                                                                                                                                                                                                                                                                                                                                                                                                                                                                                                                                                                                                                                                                                                                                                                                                                                                                                                                                                                                                                                                                                                                                                                                                                                                                                                                                                                                                                                                                                                                                                                                                                                                                                                                                                                                                                                                                                                                                                                                                                                                                                                                                                                                                                                                                                                                                                                                                                                                                                                                                                                                                                                                                                                                                                                                                                                                                                                                                                                                                                                                                                                                                                                                                                                                                                                                                                                                                                                                                                                                                                                                                                                                                                                                                                                                                                                                                                                                                                                                                                                                                                                                                                                                                                                                                                                                                                                                                                                                                                                                                                                                                                                                                                                                                                                                                                                                                                                                                                                                                                                                                                                                                                                                                                                                                                                                                                                                                                                                                                                                                                                                                                                                                                                                                                                                                                                                                                                                                                                                                                                                                                                                                                                                                                                                                                                                                                                                                                                                                                                                                                                                                                                                                                                                                                                                                                                                                                                                                                                                                                                                                                                                                                                                                                                                                                                                                                                                                                                                                                                                                                                                                                                                                                                                                                                                                                                                                                                                                                                                                                                                                                                                                                                                                                                                                                                                                                                                                                                                                                                                                                                                                                                                                                                                                                                                                                                                                                                                                                                                                                                                                  | WHO National Influenza Centre Russian Federation                                                                        | WHO National Influenza Centre Russian Federation                                                                                                                                                                                                                                  | Alexey Masharsky; Andrey Komissarov; Artem Fadeev; Daria Danilenko; Dmitry Lioznov; Elena Nabeleva; Georgii Bazykin; Kirill Varchenko; Ksenia Safina; Kseniya Komissarova; Maria Baturova; Maria Pisareva; Maria Timofeeva; Mikhail Bakaev; Nikita Yolshin; Oula Mansour; Oula Masour; Tamila Musaeva; Veronika Eder                                                                                                    |
| EPI_ISL_2566734                                                                                                                                                                                                                                                                                                                                                                                                                                                                                                                                                                                                                                                                                                                                                                                                                                                                                                                                                                                                                                                                                                                                                                                                                                                                                                                                                                                                                                                                                                                                                                                                                                                                                                                                                                                                                                                                                                                                                                                                                                                                                                                                                                                                                                                                                                                                                                                                                                                                                                                                                                                                                                                                                                                                                                                                                                                                                                                                                                                                                                                                                                                                                                                                                                                                                                                                                                                                                                                                                                                                                                                                                                                                                                                                                                                                                                                                                                                                                                                                                                                                                                                                                                                                                                                                                                                                                                                                                                                                                                                                                                                                                                                                                                                                                                                                                                                                                                                                                                                                                                                                                                                                                                                                                                                                                                                                                                                                                                                                                                                                                                                                                                                                                                                                                                                                                                                                                                                                                                                                                                                                                                                                                                                                                                                                                                                                                                                                                                                                                                                                                                                                                                                                                                                                                                                                                                                                                                                                                                                                                                                                                                                                                                                                                                                                                                                                                                                                                                                                                                                                                                                                                                                                                                                                                                                                                                                                                                                                                                                                                                                                                                                                                                                                                                                                                                                                                                                                                                                                                                                                                                                                                                                                                                                                                                                                                                                                                                                                                                                                                                                                                                                                                                                                                                                                                                                                                                                                                                                                                                                                                                                                                                                                                                                                                                                                                                                                                                                                                                                                                                                                                                                                                                                                                                                                                                                                                                                                                                                                                                                                                                                                                                                                                                                                                                                                                                                                                                                                                                                                                                                                                                                                                                                                                                            | WSSE Gorzów Wlkp.                                                                                                       | 1. National Institute of Public Health - National Institute of Hygiene; 2. Eurofins Genomics Europe Sequencing GmbH                                                                                                                                                               | ECDC COVID-19 WGS support team; Eurofins Genomics Europe Sequencing Team; Gierczyński Rafał; Sadkowska-Todys Małgorzata; Wolkowicz Tomasz; Zacharczuk Katarzyna                                                                                                                                                                                                                                                         |
| EPI_ISL_1909092, EPI_ISL_1909093, EPI_ISL_1909094, EPI_ISL_1909095                                                                                                                                                                                                                                                                                                                                                                                                                                                                                                                                                                                                                                                                                                                                                                                                                                                                                                                                                                                                                                                                                                                                                                                                                                                                                                                                                                                                                                                                                                                                                                                                                                                                                                                                                                                                                                                                                                                                                                                                                                                                                                                                                                                                                                                                                                                                                                                                                                                                                                                                                                                                                                                                                                                                                                                                                                                                                                                                                                                                                                                                                                                                                                                                                                                                                                                                                                                                                                                                                                                                                                                                                                                                                                                                                                                                                                                                                                                                                                                                                                                                                                                                                                                                                                                                                                                                                                                                                                                                                                                                                                                                                                                                                                                                                                                                                                                                                                                                                                                                                                                                                                                                                                                                                                                                                                                                                                                                                                                                                                                                                                                                                                                                                                                                                                                                                                                                                                                                                                                                                                                                                                                                                                                                                                                                                                                                                                                                                                                                                                                                                                                                                                                                                                                                                                                                                                                                                                                                                                                                                                                                                                                                                                                                                                                                                                                                                                                                                                                                                                                                                                                                                                                                                                                                                                                                                                                                                                                                                                                                                                                                                                                                                                                                                                                                                                                                                                                                                                                                                                                                                                                                                                                                                                                                                                                                                                                                                                                                                                                                                                                                                                                                                                                                                                                                                                                                                                                                                                                                                                                                                                                                                                                                                                                                                                                                                                                                                                                                                                                                                                                                                                                                                                                                                                                                                                                                                                                                                                                                                                                                                                                                                                                                                                                                                                                                                                                                                                                                                                                                                                                                                                                                                                                         | WSSE Katowice                                                                                                           | 1. Academic Center for Pathomorphological and Genetic-Molecular Diagnostics Ltd, Białystok, Poland 2. National Institute of Public Health - National Institute of Hygiene, Warsaw, Poland                                                                                         | Anetta Sulewska; Jacek Nikliński; Janusz Dzięcioł; Joanna Kiśluk; Katarzyna Zacharczuk; Konrad Raczkowski; Magdalena Nowakowska; Małgorzata Sadkowska-Todys; Piotr Karabowicz; Piotr Majewski; Przemysław Bieчек. Joanna Reszeć; Radosław Charkiewicz; Tomasz Wolkowicz                                                                                                                                                 |
| EPI_ISL_2377205, EPI_ISL_2377207                                                                                                                                                                                                                                                                                                                                                                                                                                                                                                                                                                                                                                                                                                                                                                                                                                                                                                                                                                                                                                                                                                                                                                                                                                                                                                                                                                                                                                                                                                                                                                                                                                                                                                                                                                                                                                                                                                                                                                                                                                                                                                                                                                                                                                                                                                                                                                                                                                                                                                                                                                                                                                                                                                                                                                                                                                                                                                                                                                                                                                                                                                                                                                                                                                                                                                                                                                                                                                                                                                                                                                                                                                                                                                                                                                                                                                                                                                                                                                                                                                                                                                                                                                                                                                                                                                                                                                                                                                                                                                                                                                                                                                                                                                                                                                                                                                                                                                                                                                                                                                                                                                                                                                                                                                                                                                                                                                                                                                                                                                                                                                                                                                                                                                                                                                                                                                                                                                                                                                                                                                                                                                                                                                                                                                                                                                                                                                                                                                                                                                                                                                                                                                                                                                                                                                                                                                                                                                                                                                                                                                                                                                                                                                                                                                                                                                                                                                                                                                                                                                                                                                                                                                                                                                                                                                                                                                                                                                                                                                                                                                                                                                                                                                                                                                                                                                                                                                                                                                                                                                                                                                                                                                                                                                                                                                                                                                                                                                                                                                                                                                                                                                                                                                                                                                                                                                                                                                                                                                                                                                                                                                                                                                                                                                                                                                                                                                                                                                                                                                                                                                                                                                                                                                                                                                                                                                                                                                                                                                                                                                                                                                                                                                                                                                                                                                                                                                                                                                                                                                                                                                                                                                                                                                                                                           | WSSE Katowice                                                                                                           | 1. National Institute of Public Health - National Institute of Hygiene; 2. Eurofins Genomics Europe Sequencing GmbH                                                                                                                                                               | ECDC COVID-19 WGS support team; Eurofins Genomics Europe Sequencing Team; Gierczyński Rafał; Sadkowska-Todys Małgorzata; Wolkowicz Tomasz; Zacharczuk Katarzyna                                                                                                                                                                                                                                                         |
| EPI_ISL_2131214                                                                                                                                                                                                                                                                                                                                                                                                                                                                                                                                                                                                                                                                                                                                                                                                                                                                                                                                                                                                                                                                                                                                                                                                                                                                                                                                                                                                                                                                                                                                                                                                                                                                                                                                                                                                                                                                                                                                                                                                                                                                                                                                                                                                                                                                                                                                                                                                                                                                                                                                                                                                                                                                                                                                                                                                                                                                                                                                                                                                                                                                                                                                                                                                                                                                                                                                                                                                                                                                                                                                                                                                                                                                                                                                                                                                                                                                                                                                                                                                                                                                                                                                                                                                                                                                                                                                                                                                                                                                                                                                                                                                                                                                                                                                                                                                                                                                                                                                                                                                                                                                                                                                                                                                                                                                                                                                                                                                                                                                                                                                                                                                                                                                                                                                                                                                                                                                                                                                                                                                                                                                                                                                                                                                                                                                                                                                                                                                                                                                                                                                                                                                                                                                                                                                                                                                                                                                                                                                                                                                                                                                                                                                                                                                                                                                                                                                                                                                                                                                                                                                                                                                                                                                                                                                                                                                                                                                                                                                                                                                                                                                                                                                                                                                                                                                                                                                                                                                                                                                                                                                                                                                                                                                                                                                                                                                                                                                                                                                                                                                                                                                                                                                                                                                                                                                                                                                                                                                                                                                                                                                                                                                                                                                                                                                                                                                                                                                                                                                                                                                                                                                                                                                                                                                                                                                                                                                                                                                                                                                                                                                                                                                                                                                                                                                                                                                                                                                                                                                                                                                                                                                                                                                                                                                                                            | WSSE Warszawa                                                                                                           | 1. National Institute of Public Health - National Institute of Hygiene, Warsaw, Poland 2. Biobank Lab, University of Lodz 3. Laboratory of Respiratory Viruses, Teaching and Clinical Center of the Medical University of Lodz                                                    | Dominik Strapagiel; Izabela Dróżdż; Jakub Lach; Katarzyna Zacharczuk; Klaudyna Królikowska; Maciej Borowiec; Magdalena Nowakowska; Magdalena Traczyk-Borszyńska; Marcin Słomka; Marta Sobalska-Kwapis; Małgorzata Sadkowska-Todys; Tomasz Płoszaj; Tomasz Wolkowicz                                                                                                                                                     |
| EPI_ISL_2365681, EPI_ISL_2448918, EPI_ISL_2448927, EPI_ISL_2448928, EPI_ISL_2448929                                                                                                                                                                                                                                                                                                                                                                                                                                                                                                                                                                                                                                                                                                                                                                                                                                                                                                                                                                                                                                                                                                                                                                                                                                                                                                                                                                                                                                                                                                                                                                                                                                                                                                                                                                                                                                                                                                                                                                                                                                                                                                                                                                                                                                                                                                                                                                                                                                                                                                                                                                                                                                                                                                                                                                                                                                                                                                                                                                                                                                                                                                                                                                                                                                                                                                                                                                                                                                                                                                                                                                                                                                                                                                                                                                                                                                                                                                                                                                                                                                                                                                                                                                                                                                                                                                                                                                                                                                                                                                                                                                                                                                                                                                                                                                                                                                                                                                                                                                                                                                                                                                                                                                                                                                                                                                                                                                                                                                                                                                                                                                                                                                                                                                                                                                                                                                                                                                                                                                                                                                                                                                                                                                                                                                                                                                                                                                                                                                                                                                                                                                                                                                                                                                                                                                                                                                                                                                                                                                                                                                                                                                                                                                                                                                                                                                                                                                                                                                                                                                                                                                                                                                                                                                                                                                                                                                                                                                                                                                                                                                                                                                                                                                                                                                                                                                                                                                                                                                                                                                                                                                                                                                                                                                                                                                                                                                                                                                                                                                                                                                                                                                                                                                                                                                                                                                                                                                                                                                                                                                                                                                                                                                                                                                                                                                                                                                                                                                                                                                                                                                                                                                                                                                                                                                                                                                                                                                                                                                                                                                                                                                                                                                                                                                                                                                                                                                                                                                                                                                                                                                                                                                                                                                        | WSSE w Gdańsku                                                                                                          | 1. National Institute of Public Health - National Institute of Hygiene, Warsaw, Poland 2. Biobank Lab, University of Lodz 3. Laboratory of Respiratory Viruses, Teaching and Clinical Center of the Medical University of Lodz                                                    | Dominik Strapagiel; Izabela Dróżdż; Jakub Lach; Katarzyna Zacharczuk; Klaudyna Królikowska; Maciej Borowiec; Magdalena Nowakowska; Magdalena Traczyk-Borszyńska; Marcin Słomka; Marta Sobalska-Kwapis; Małgorzata Sadkowska-Todys; Tomasz Płoszaj; Tomasz Wolkowicz                                                                                                                                                     |
| EPI_ISL_2090620, EPI_ISL_2090622, EPI_ISL_2090623, EPI_ISL_2094440                                                                                                                                                                                                                                                                                                                                                                                                                                                                                                                                                                                                                                                                                                                                                                                                                                                                                                                                                                                                                                                                                                                                                                                                                                                                                                                                                                                                                                                                                                                                                                                                                                                                                                                                                                                                                                                                                                                                                                                                                                                                                                                                                                                                                                                                                                                                                                                                                                                                                                                                                                                                                                                                                                                                                                                                                                                                                                                                                                                                                                                                                                                                                                                                                                                                                                                                                                                                                                                                                                                                                                                                                                                                                                                                                                                                                                                                                                                                                                                                                                                                                                                                                                                                                                                                                                                                                                                                                                                                                                                                                                                                                                                                                                                                                                                                                                                                                                                                                                                                                                                                                                                                                                                                                                                                                                                                                                                                                                                                                                                                                                                                                                                                                                                                                                                                                                                                                                                                                                                                                                                                                                                                                                                                                                                                                                                                                                                                                                                                                                                                                                                                                                                                                                                                                                                                                                                                                                                                                                                                                                                                                                                                                                                                                                                                                                                                                                                                                                                                                                                                                                                                                                                                                                                                                                                                                                                                                                                                                                                                                                                                                                                                                                                                                                                                                                                                                                                                                                                                                                                                                                                                                                                                                                                                                                                                                                                                                                                                                                                                                                                                                                                                                                                                                                                                                                                                                                                                                                                                                                                                                                                                                                                                                                                                                                                                                                                                                                                                                                                                                                                                                                                                                                                                                                                                                                                                                                                                                                                                                                                                                                                                                                                                                                                                                                                                                                                                                                                                                                                                                                                                                                                                                                                         | WSSE w Warszawie                                                                                                        | National Institute of Public Health - National Institute of Hygiene                                                                                                                                                                                                               | Gierczyński Rafał; Sadkowska-Todys Małgorzata; Wolkowicz Tomasz; Zacharczuk Katarzyna                                                                                                                                                                                                                                                                                                                                   |
| EPI_ISL_2031771                                                                                                                                                                                                                                                                                                                                                                                                                                                                                                                                                                                                                                                                                                                                                                                                                                                                                                                                                                                                                                                                                                                                                                                                                                                                                                                                                                                                                                                                                                                                                                                                                                                                                                                                                                                                                                                                                                                                                                                                                                                                                                                                                                                                                                                                                                                                                                                                                                                                                                                                                                                                                                                                                                                                                                                                                                                                                                                                                                                                                                                                                                                                                                                                                                                                                                                                                                                                                                                                                                                                                                                                                                                                                                                                                                                                                                                                                                                                                                                                                                                                                                                                                                                                                                                                                                                                                                                                                                                                                                                                                                                                                                                                                                                                                                                                                                                                                                                                                                                                                                                                                                                                                                                                                                                                                                                                                                                                                                                                                                                                                                                                                                                                                                                                                                                                                                                                                                                                                                                                                                                                                                                                                                                                                                                                                                                                                                                                                                                                                                                                                                                                                                                                                                                                                                                                                                                                                                                                                                                                                                                                                                                                                                                                                                                                                                                                                                                                                                                                                                                                                                                                                                                                                                                                                                                                                                                                                                                                                                                                                                                                                                                                                                                                                                                                                                                                                                                                                                                                                                                                                                                                                                                                                                                                                                                                                                                                                                                                                                                                                                                                                                                                                                                                                                                                                                                                                                                                                                                                                                                                                                                                                                                                                                                                                                                                                                                                                                                                                                                                                                                                                                                                                                                                                                                                                                                                                                                                                                                                                                                                                                                                                                                                                                                                                                                                                                                                                                                                                                                                                                                                                                                                                                                                                                            | Weill Cornell Medicine                                                                                                  | New York Genome Center                                                                                                                                                                                                                                                            | Andre Corvelo; Arryn Craney; Chris Mason; Dayna M. Oschwald; Hanna Rennett; Lars F Westblade; Margaret Elizabeth Ross; Melissa Cushing; Michael Zody; Olivier Elemento; Priya Velu; Samantha Fennessey; Tom Maniatis                                                                                                                                                                                                    |
| EPI_ISL_2709409, EPI_ISL_2709410, EPI_ISL_2709411, EPI_ISL_2709412, EPI_ISL_2709413, EPI_ISL_2709414, EPI_ISL_2709415, EPI_ISL_2709418, EPI_ISL_2709422, EPI_ISL_2709423, EPI_ISL_2709424, EPI_ISL_2709426, EPI_ISL_2709427, EPI_ISL_2709436, EPI_ISL_2709443, EPI_ISL_2709445                                                                                                                                                                                                                                                                                                                                                                                                                                                                                                                                                                                                                                                                                                                                                                                                                                                                                                                                                                                                                                                                                                                                                                                                                                                                                                                                                                                                                                                                                                                                                                                                                                                                                                                                                                                                                                                                                                                                                                                                                                                                                                                                                                                                                                                                                                                                                                                                                                                                                                                                                                                                                                                                                                                                                                                                                                                                                                                                                                                                                                                                                                                                                                                                                                                                                                                                                                                                                                                                                                                                                                                                                                                                                                                                                                                                                                                                                                                                                                                                                                                                                                                                                                                                                                                                                                                                                                                                                                                                                                                                                                                                                                                                                                                                                                                                                                                                                                                                                                                                                                                                                                                                                                                                                                                                                                                                                                                                                                                                                                                                                                                                                                                                                                                                                                                                                                                                                                                                                                                                                                                                                                                                                                                                                                                                                                                                                                                                                                                                                                                                                                                                                                                                                                                                                                                                                                                                                                                                                                                                                                                                                                                                                                                                                                                                                                                                                                                                                                                                                                                                                                                                                                                                                                                                                                                                                                                                                                                                                                                                                                                                                                                                                                                                                                                                                                                                                                                                                                                                                                                                                                                                                                                                                                                                                                                                                                                                                                                                                                                                                                                                                                                                                                                                                                                                                                                                                                                                                                                                                                                                                                                                                                                                                                                                                                                                                                                                                                                                                                                                                                                                                                                                                                                                                                                                                                                                                                                                                                                                                                                                                                                                                                                                                                                                                                                                                                                                                                                                                                             |                                                                                                                         |                                                                                                                                                                                                                                                                                   |                                                                                                                                                                                                                                                                                                                                                                                                                         |
| see above                                                                                                                                                                                                                                                                                                                                                                                                                                                                                                                                                                                                                                                                                                                                                                                                                                                                                                                                                                                                                                                                                                                                                                                                                                                                                                                                                                                                                                                                                                                                                                                                                                                                                                                                                                                                                                                                                                                                                                                                                                                                                                                                                                                                                                                                                                                                                                                                                                                                                                                                                                                                                                                                                                                                                                                                                                                                                                                                                                                                                                                                                                                                                                                                                                                                                                                                                                                                                                                                                                                                                                                                                                                                                                                                                                                                                                                                                                                                                                                                                                                                                                                                                                                                                                                                                                                                                                                                                                                                                                                                                                                                                                                                                                                                                                                                                                                                                                                                                                                                                                                                                                                                                                                                                                                                                                                                                                                                                                                                                                                                                                                                                                                                                                                                                                                                                                                                                                                                                                                                                                                                                                                                                                                                                                                                                                                                                                                                                                                                                                                                                                                                                                                                                                                                                                                                                                                                                                                                                                                                                                                                                                                                                                                                                                                                                                                                                                                                                                                                                                                                                                                                                                                                                                                                                                                                                                                                                                                                                                                                                                                                                                                                                                                                                                                                                                                                                                                                                                                                                                                                                                                                                                                                                                                                                                                                                                                                                                                                                                                                                                                                                                                                                                                                                                                                                                                                                                                                                                                                                                                                                                                                                                                                                                                                                                                                                                                                                                                                                                                                                                                                                                                                                                                                                                                                                                                                                                                                                                                                                                                                                                                                                                                                                                                                                                                                                                                                                                                                                                                                                                                                                                                                                                                                                                                  | West Java Health Laboratory                                                                                             | Eijkman Institute for Molecular Biology, National Research and Innovation Agency; West Java Health Laboratory                                                                                                                                                                     | Amin Soebandrio; Azzania Fibriani; Cut Nur Cinthia Alamanda; Edison Johar; Ema Rahmawati; Filasista A Yudhaputri; Hidayat Trimarsanto; Iskandar Adnan; Khin Say Myint; Lidwina Priliiani; Lydia V. Pangallo; Muhammad Rezki Rasyak; Rifky Waluyajati Rachman; Ryan Bayusantika Ristandi; Safarina G Malik; Sukma Oktavianthi; Willy Augustine Ben Olsen; Jonathan Barnell; Katherine Wiggins; Mike Grose; and Phil Adam |
| EPI_ISL_2885887                                                                                                                                                                                                                                                                                                                                                                                                                                                                                                                                                                                                                                                                                                                                                                                                                                                                                                                                                                                                                                                                                                                                                                                                                                                                                                                                                                                                                                                                                                                                                                                                                                                                                                                                                                                                                                                                                                                                                                                                                                                                                                                                                                                                                                                                                                                                                                                                                                                                                                                                                                                                                                                                                                                                                                                                                                                                                                                                                                                                                                                                                                                                                                                                                                                                                                                                                                                                                                                                                                                                                                                                                                                                                                                                                                                                                                                                                                                                                                                                                                                                                                                                                                                                                                                                                                                                                                                                                                                                                                                                                                                                                                                                                                                                                                                                                                                                                                                                                                                                                                                                                                                                                                                                                                                                                                                                                                                                                                                                                                                                                                                                                                                                                                                                                                                                                                                                                                                                                                                                                                                                                                                                                                                                                                                                                                                                                                                                                                                                                                                                                                                                                                                                                                                                                                                                                                                                                                                                                                                                                                                                                                                                                                                                                                                                                                                                                                                                                                                                                                                                                                                                                                                                                                                                                                                                                                                                                                                                                                                                                                                                                                                                                                                                                                                                                                                                                                                                                                                                                                                                                                                                                                                                                                                                                                                                                                                                                                                                                                                                                                                                                                                                                                                                                                                                                                                                                                                                                                                                                                                                                                                                                                                                                                                                                                                                                                                                                                                                                                                                                                                                                                                                                                                                                                                                                                                                                                                                                                                                                                                                                                                                                                                                                                                                                                                                                                                                                                                                                                                                                                                                                                                                                                                                                                            | Wichita State University- Molecular Diagnostic Lab                                                                      | Kansas Health and Environmental Lab                                                                                                                                                                                                                                               | Abigail C. Shockey; Alicia J. Mooney; Erika M. Hanson; Kelsey R. Florek; Richard Griesser; Sara Wagner; Tonya Danz                                                                                                                                                                                                                                                                                                      |
| EPI_ISL_2558139                                                                                                                                                                                                                                                                                                                                                                                                                                                                                                                                                                                                                                                                                                                                                                                                                                                                                                                                                                                                                                                                                                                                                                                                                                                                                                                                                                                                                                                                                                                                                                                                                                                                                                                                                                                                                                                                                                                                                                                                                                                                                                                                                                                                                                                                                                                                                                                                                                                                                                                                                                                                                                                                                                                                                                                                                                                                                                                                                                                                                                                                                                                                                                                                                                                                                                                                                                                                                                                                                                                                                                                                                                                                                                                                                                                                                                                                                                                                                                                                                                                                                                                                                                                                                                                                                                                                                                                                                                                                                                                                                                                                                                                                                                                                                                                                                                                                                                                                                                                                                                                                                                                                                                                                                                                                                                                                                                                                                                                                                                                                                                                                                                                                                                                                                                                                                                                                                                                                                                                                                                                                                                                                                                                                                                                                                                                                                                                                                                                                                                                                                                                                                                                                                                                                                                                                                                                                                                                                                                                                                                                                                                                                                                                                                                                                                                                                                                                                                                                                                                                                                                                                                                                                                                                                                                                                                                                                                                                                                                                                                                                                                                                                                                                                                                                                                                                                                                                                                                                                                                                                                                                                                                                                                                                                                                                                                                                                                                                                                                                                                                                                                                                                                                                                                                                                                                                                                                                                                                                                                                                                                                                                                                                                                                                                                                                                                                                                                                                                                                                                                                                                                                                                                                                                                                                                                                                                                                                                                                                                                                                                                                                                                                                                                                                                                                                                                                                                                                                                                                                                                                                                                                                                                                                                                                            | Wisconsin State Laboratory of Hygiene Communicable Disease Division                                                     | Wisconsin State Laboratory of Hygiene Communicable Disease Division                                                                                                                                                                                                               |                                                                                                                                                                                                                                                                                                                                                                                                                         |
| EPI_ISL_2854269                                                                                                                                                                                                                                                                                                                                                                                                                                                                                                                                                                                                                                                                                                                                                                                                                                                                                                                                                                                                                                                                                                                                                                                                                                                                                                                                                                                                                                                                                                                                                                                                                                                                                                                                                                                                                                                                                                                                                                                                                                                                                                                                                                                                                                                                                                                                                                                                                                                                                                                                                                                                                                                                                                                                                                                                                                                                                                                                                                                                                                                                                                                                                                                                                                                                                                                                                                                                                                                                                                                                                                                                                                                                                                                                                                                                                                                                                                                                                                                                                                                                                                                                                                                                                                                                                                                                                                                                                                                                                                                                                                                                                                                                                                                                                                                                                                                                                                                                                                                                                                                                                                                                                                                                                                                                                                                                                                                                                                                                                                                                                                                                                                                                                                                                                                                                                                                                                                                                                                                                                                                                                                                                                                                                                                                                                                                                                                                                                                                                                                                                                                                                                                                                                                                                                                                                                                                                                                                                                                                                                                                                                                                                                                                                                                                                                                                                                                                                                                                                                                                                                                                                                                                                                                                                                                                                                                                                                                                                                                                                                                                                                                                                                                                                                                                                                                                                                                                                                                                                                                                                                                                                                                                                                                                                                                                                                                                                                                                                                                                                                                                                                                                                                                                                                                                                                                                                                                                                                                                                                                                                                                                                                                                                                                                                                                                                                                                                                                                                                                                                                                                                                                                                                                                                                                                                                                                                                                                                                                                                                                                                                                                                                                                                                                                                                                                                                                                                                                                                                                                                                                                                                                                                                                                                                                            | Wojewodzka Stacja Sanitarno-Epidemiologiczna w Lodzi, Oddzial Laboratorijny Mikrobiologii i Parazytologii               | Wojewodzka Stacja Sanitarno-Epidemiologiczna w Lodzi, Oddzial Laboratorijny Mikrobiologii i Parazytologii                                                                                                                                                                         | Agnieszka Karnowska                                                                                                                                                                                                                                                                                                                                                                                                     |

|                                                                                                                       |                                                         |                                                                                                                                                                           |
|-----------------------------------------------------------------------------------------------------------------------|---------------------------------------------------------|---------------------------------------------------------------------------------------------------------------------------------------------------------------------------|
| EPI_ISL_2561981, EPI_ISL_2561993, EPI_ISL_2561999, EPI_ISL_2562003, EPI_ISL_2562006, EPI_ISL_2562010, EPI_ISL_2562012 |                                                         |                                                                                                                                                                           |
| see above                                                                                                             | cerballiance-IDF                                        | Cerba lab                                                                                                                                                                 |
| EPI_ISL_2845197                                                                                                       | labopart - Medizinische Laboratorien Dresden            | Robert Koch Institute                                                                                                                                                     |
| EPI_ISL_2795753                                                                                                       | laboratoire Belle Epine                                 | Department of Virology, Henri Mondor University Hospital, Assistance Publique Hôpitaux de Paris, Université Paris-Est Créteil, INSERM U955                                |
| EPI_ISL_2760488                                                                                                       | nordlab - Partnerschaftspraxis für Laboratoriumsmedizin | Robert Koch Institute                                                                                                                                                     |
|                                                                                                                       |                                                         | Aude Lessenne; Bénédicte Roquebert; Emmanuel Lecorche; Kader Merah; Laura Verdurme; Patrice Herisson; Sabine Trombert-Paolantoni; Stéphanie Haim-Boukobza; Thierry Collin |
|                                                                                                                       |                                                         | Alexandre Soulier; Christophe Rodriguez; Elisabeth Trawinski; Guillaume Gricourt; Jean-Michel Pawlotsky; Melissa N'Debi; Slim Fourati; Vanessa Demontant                  |
